# Supplementary material for: HIV-1 nuclear import in macrophages is regulated by CPSF6-capsid interactions at the nuclear pore complex
Source: eLife. 2019 Jan 23;8:e41800. doi: 10.7554/eLife.41800 (PMC6400501; doi:10.7554/eLife.41800)
Supplement: Figure 1—figure supplement 3—source data 1. [file elife-41800-fig1-figsupp3-data1.xlsx]

## Sheet: Fig 1 - fig supp 3
Mean CA signal intensities of individual RTC/PIC
																															Not shown in the plot because of low number
				WT HIV-1									Statistical analysis													A77V HIV-1									Statistical analysis
				Cytoplasm NS	Cytoplasm KD	N.envelope NS	N.envelope KD	Nucleus NS	Nucleus KD				Table Analyzed	CPSF6 NS kd WT PIC			Table Analyzed	CPSF6 NS kd WT PIC			Table Analyzed	CPSF6 NS kd WT PIC				Cytoplasm NS	Cytoplasm KD	N.envelope NS	N.envelope KD	Nucleus NS	Nucleus KD				Table Analyzed	CPSF6 NS kd A77V PIC				Table Analyzed	CPSF6 NS kd A77V PIC				Table Analyzed	CPSF6 NS kd A77V PIC
				226.15	8213.36	4932.24	4309.88	98965.1	21355.5																	31846.2	45934.1	16485.4	32768.3	4256.31	13025.3
				136.67	17292.1	6513.09	13688.3	58909.8	50690				Column F	Nucleus KD			Column D	N.envelope KD			Column B	Cytoplasm KD				19832.9	271.43	11366.5	8288.33	37861.6	14173.4				Column F	Nucleus KD				Column B	Cytoplasm KD				Column D	N.envelope KD
				39399.5	31.52	20724.4	12988.3	32318.1	24.01				vs.	vs.			vs.	vs.			vs.	vs.				21838.2	671.26	20043.2	23367.5	91345.6					vs.	vs.				vs.	vs.				vs.	vs.
				35856.6	69821.6	27109.3	874.62	27740.7	44.49				Column E	Nucleus NS			Column C	N.envelope NS			Column A	Cytoplasm NS				2683.6	121.38	18587.5	19395.4						Column E	Nucleus NS				Column A	Cytoplasm NS				Column C	N.envelope NS
				34029.6	15224.2	30480.8	5780.01	59477.3	42892.5																	4501.27	65218.2	27808.8	12997.7
				91288	33543.1	1682.61	26411.1	34576.8	44453.5				Mann Whitney test				Mann Whitney test				Mann Whitney test					14127.1	35728.6	17214.1	1580.05						Mann Whitney test					Mann Whitney test					Mann Whitney test
				36648.4	11680.8	21249.4	11234.4	136786	38593.6				P value	0.9705			P value	0.923			P value	0.4826				15890.6	24900.8	8014.92	72416.3						P value	0.8				P value	0.2097				P value	0.4091
				116422	17031.2	13446.5	11234.4	73213.1	58409.3				Exact or approximate P value?	Exact			Exact or approximate P value?	Exact			Exact or approximate P value?	Approximate				4701.69	17253.9	9924.75	314.4						Exact or approximate P value?	Exact				Exact or approximate P value?	Approximate				Exact or approximate P value?	Exact
				24312.2	18597	9145.73	10675.7	105094	19019.5				P value summary	ns			P value summary	ns			P value summary	ns				4164.84	267.34	16891.7	5063.61						P value summary	ns				P value summary	ns				P value summary	ns
				9327.86	12743.3	4596.87	58745.4	117936	20579.4				Significantly different (P < 0.05)?	No			Significantly different (P < 0.05)?	No			Significantly different (P < 0.05)?	No				13575.4	75089.4	13398	10972.4						Significantly different (P < 0.05)?	No				Significantly different (P < 0.05)?	No				Significantly different (P < 0.05)?	No
				549.69	2817.24	8762.81	28208.2	55395.2	22724.1				One- or two-tailed P value?	Two-tailed			One- or two-tailed P value?	Two-tailed			One- or two-tailed P value?	Two-tailed				5083.13	1222.35	10722.6	17571.5						One- or two-tailed P value?	Two-tailed				One- or two-tailed P value?	Two-tailed				One- or two-tailed P value?	Two-tailed
				2036.53	727.2	16395.9	58745.4	59720.5	24872.5				Sum of ranks in column E,F	26685 , 6468			Sum of ranks in column C,D	6599 , 7766			Sum of ranks in column A,B	38105 , 47386				15090.6	3541.77	20188.2	5372.42						Sum of ranks in column E,F	10 , 5				Sum of ranks in column A,B	23012 , 12766				Sum of ranks in column C,D	4218 , 2110
				365.97	21131	11589.5	6268.76	42197	6518.88				Mann-Whitney U	5157			Mann-Whitney U	3518			Mann-Whitney U	20125				16742.9	2107.61	15132.9	82718						Mann-Whitney U	2				Mann-Whitney U	7615				Mann-Whitney U	1215
				90.86	30190.2	4109.38	1156.5	78210.9	44749.9																	18777.6	1035.09	24275.8	56857.8
				95618	27052.8	28596.3	9309.2	54833.3	53944.6				Difference between medians				Difference between medians				Difference between medians					16463.5	825.84	15637.6	22425.3						Difference between medians					Difference between medians					Difference between medians
				366.3	9980.2	15260.2	9914.83	89440.8	10114.2				Median of column E	41171, n=207			Median of column C	15795, n=78			Median of column A	22012, n=180				2000.2	2297.28	26049	6505.7						Median of column E	37862, n=3				Median of column A	17389, n=166				Median of column C	14624, n=77
				221.39	191.05	18995.8	4653.17	58672.4	50171.6				Median of column F	40301, n=50			Median of column D	14641, n=91			Median of column B	18412, n=233				1530.91	1073.63	7877.89	15563.1						Median of column F	13599, n=2				Median of column B	13833, n=101				Median of column D	14497, n=35
				51916.1	945.39	22782.8	7720.89	106342	29317.4				Difference: Actual	-870.4			Difference: Actual	-1154			Difference: Actual	-3600				13104.2	241.35	8629.12	17065.6						Difference: Actual	-24262				Difference: Actual	-3557				Difference: Actual	-126.6
				555.95	18597	17913.4	16810.5	113275	31197.4				Difference: Hodges-Lehmann	152.7			Difference: Hodges-Lehmann	183.1			Difference: Hodges-Lehmann	-758				9236.94	769.38	6787.63	34886.5						Difference: Hodges-Lehmann	-24262				Difference: Hodges-Lehmann	-1850				Difference: Hodges-Lehmann	2086
				19820.4	2817.24	14393.7	11934.4	150500	18619.9																	7949.71	95728.3	6673.41	14497.1
				166135	21131	3442.76	19285.9	124381	22546.3																	40370.7	57.07	15336.1	79824.9
				88926.3	30190.2	8186.91	7092.88	165434	5520.34																	1335.5	58873.2	12421.3	9680.48
				42439.9	27052.8	17453.4	3610.37	77954.3	76783																	92365.2	42117.9	65893.3	21587.3
				25204.2	9980.2	4514.48	13076.3	111479	92653.3																	10309.8	13832.7	5229.45	9532.15
				153318	55483.3	4668.45	25859.2	106930	103045																	1104.01	24115.7	19782.5	14404.9
				85114.1	78870.9	10811.2	17486.5	74052.9	34473.9																	1858.21	50379.1	10315	32178.9
				96.69	114944	14100.1	34946.1	65945.3	57845.5																	1995.46	34894.5	2777.24	10622.9
				36364.6	80898.9	23930.6	56637.4	84477.8	102854																	898.18	64641.9	6392.67	11066.6
				328.45	4410.23	16481.9	14641	68082.7	101280																	2159.56	56582.4	3457.43	33364.2
				12862.1	74884.2	15843.7	34083.9	85543.3	79940.4																	16290.8	3081.79	3401.12	14352.6
				415.38	40138.3	21163.5	11704	132667	39653.3																	20511.5	456.16	12392.2	81225.6
				21806.4	13863	1279.2	12325.8	101194	51530.2																	15578.3	2543.69	4138.45	10237
				5815.75	15926.8	16572.6	49162.3	137659	109333																	40322.3	3681.39	8557.98	29295.2
				43188.1	24390	18303.8	61758.9	192109	101693																	63666.6	337.69	13213.6	8719.62
				23213.9	7825.87	29146.9	4401.06	139613	98531.4																	69097.9	2551.55	14623.7	10667.9
				17560.9	23700.8	47355.8	36277.6	45938.9	101282																	89748.1	738.37	44766
				18503.3	85396	22044.7	11292.9	69948.8	3027.57																	116624	9816.2	6927.01
				5185.89	13361.9	20242.3	20793.2	37140.6	34371.1																	9914.19	60364.3	15973.9
				7242.62	27517.4	11147.9	3192.13	63916.4	58014.5																	36022.8	35793.4	16796.6
				17094.5	16273.7	39975.8	24545.1	45017.3	33332.7																	46489.9	30997.4	96220.6
				2120.45	13289.1	34713.1	36542.3	58624.1	28955.3																	66526.7	37102.6	11764.6
				28291.2	40138.3	3546.58	26261.7	63770.1	8686.38																	96186.1	6662.57	64575.2
				7257.21	13863	36464.7	2506.52	53962.4	9656.16																	46953.1	42263.4	12499.9
				38007.8	9953.77	11239.5	33628.2	71928.6	23123.3																	55876.8	5406.68	6364.81
				5104.38	15926.8	28352.4	54287.6	55238.4	8934.48																	120638	7676.53	21055.9
				14578	42722.5	62162.4	9806.42	109268	134817																	84938.6	21314.7	975.89
				26895.1	24390	724.41	1304.19	106622	110798																	18073.5	6063.44	16261.5
				29846.3	7825.87	14291.2	18099.4	27690.8	112044																	60871.7	2076.19	3392.9
				52101.5	23700.8	83784.5	5847.14	15838.7	40948.5																	77204.9	8662.03	9317.62
				6067.47	85396	9065.52	1799.67	28888.6	61281.4																	8679.31	983.24	87403.1
				9065.73	18411.8	3809.85	36162.9	21359.5																		23850.2	682.62	23523.4
				46116.4	13361.9	50591.5	23923.6	24678.3																		14006.3	1105.02	26775.6
				2254.68	12822.5	21420.7	90106.3	46276.9																		17493.4	583.26	59844.2
				5492.33	17668	6407.58	10568.8	32241.9																		51234.7	8765.34	838.65
				8126.49	8132.95	12591.2	27092.5	19511.4																		6241.7	120.52	19794.9
				2230.07	434.54	5405.75	9282.59	71477.4																		8964.15	1377.62	7445.94
				901.13	67.71	31936.3	16078.2	61395.7																		16.18	3773.31	27350.9
				19095.5	49515.2	35862.4	124462	126051																		72159.7	44.19	23308.7
				5161.73	6465.55	35432	254.83	113266																		45482	36412.7	53968.9
				15439.4	1016.51	7649.02	369.85	75715.1																		62150.2	54584.8	25088.1
				5230.06	3125.77	16727.8	64.53	88308																		94385.9	12356.2	10729.5
				6848.66	20784.8	54876.3	276.59	98978.6																		40080.6	31566.3	8012.48
				31477.1	4884.98	35044.6	8100.82	51311.1																		6870.14	8659.85	44778.2
				36885	2560.64	11993.9	36357.4	74144.4																		16787.1	12284.5	5793.94
				5887.06	1486.44	10079.5	15251	68620.8																		32377.1	34196.8	275542
				12779.9	13485.9	25847.2	176.6	1631.01																		19710.3	105640	569.35
				13847.6	45427.9	6651.74	13690.4	21343.1																		39919	9850.6	26765.8
				659.57	609.22	21283.4	3118.89	36312																		87971.8	40292.5	31245
				8944.1	11467.9	14897.4	1451	11937.7																		24727.3	20423.1	7761.04
				17479.2	342.96	15745.9	6388.91	53245																		133323	70611.1	18087.1
				420.92	62652.8	3688.34	50359.7	31516.8																		119682	55769.8	2117.97
				735.14	9569.39	12560.1	64899.2	15836.1																		2507.04	10975.6	81782
				10707.9	47743.5	925.98	51751.6	41564.8																		1287.99	56008.7	40381
				3779.78	3300.02	46280.1	75400.5	6907.15																		3698.8	14221.5	61360.6
				13771.3	34857.2	19136.1	54.75	50482.9																		1085.92	34949.6	1019.36
				16790.9	61376.5	112055	50265.8	30460.1																		36463.3	94466.9	9980.94
				11518.7	45585.2	4263.05	12256.1	33305																		26530.5	9109.98	20.26
				23327.9	30911.8	7839.13	16745.8	9296.13																		36388.4	11979.1
				48981.1	8212.01		9981.31	25286.1																		40722	56462.6
				21340.9	29695.4		17300.8	20761.1																		42734.1	76701.5
				34428.3	27759.7		17319.5	20873.3																		18768.7	25979.8
				14599.5	67097.5		38071.6	19638.8																		33654.6	12455.2
				56538.7	43698.3		75014.4	11420.8																		37579.4	11535.2
				27837.9	58665.6		14573.9	7506																		23.7	69867.6
				67265.5	44063.2		30659.1	46407.1																		12750.8	9859
				110215	58653.7		27799.5	17742.6																		1509.21	16806.3
				23962	57267.7		16471.1	4439.4																		51807.5	18793.4
				3004.23	44252.1		12679.2	38549.2																		54314.8	72225.2
				12623.7	42141.5		19657.1	64502.4																		5369.38	10320.1
				33019.7	39598.9		31248.2	54136.9																		10526.9	41263.8
				36899.7	159704		38310.2	37944																		14154.1	35089
				43726.3	17393.5			28191.2																		25914.3	42571.3
				12930	54230			26082.3																		7460.35	14881
				6762.33	50.43			24154.9																		15969.2	39540.2
				33160.5	10188.9			53046.3																		753.69	25686.2
				13600.7	14918.5			18295.8																		2916.3	13324.3
				23286.3	15004.7			32376																		1776.73	18838.7
				17209	13607.7			40804.6																		3758.96	24783.1
				31368.8	28814.9			28386.7																		12495.9	14797
				17206	31.98			64041.2																		14143.8	17045.9
				22837.7	16761.2			66438.3																		32530	9066.88
				41047.2	43586.3			29327.8																		9461.03
				13031.1	32816.5			41171.3																		1542.82
				52334.5	37343			1485.32																		10581.5
				41828.5	2269.83			50011.5																		18835.7
				32562.9	23935.6			4561.48																		10626.1
				35373.8	1474.32			6095.51																		22408.3
				1507.5	2980.27			62546.6																		24992.3
				4071.81	5849.74			33900.9																		23081.5
				44299.3	11592.5			54740.8																		50025.5
				81306.4	1987.59			64283.4																		22700.7
				43895.1	65431.6			43637																		90320.3
				23036	114482			2707.95																		131406
				4562.7	23030			53500.3																		3086.38
				70109.7	12237.6			1621.23																		2223.59
				25027.3	110426			65014.9																		24631.9
				20608.7	1289.32			7252.87																		19495.3
				18306.4	80567.1			60411.7																		108050
				20579.6	37784.7			44931.3																		76818.2
				16944.8	32313.8			66127.7																		78532.8
				10718.9	20480.3			42218.5																		6575.23
				10015.8	1413.67			21833.8																		21.01
				48109	16571.6			12012.6																		5142.13
				49323.8	264.26			71266.2																		203.35
				22962.3	835.93			5408.62																		33245.3
				31590.3	2184.34			30436.6																		8057.21
				7105.03	23916			39368.8																		14688.6
				10830.4	53675.5			50640.9																		345.21
				47573.6	41335.6			7045.67																		538.53
				20641.9	12090.2			48959.6																		21655.2
				7030.95	10180.1			3795.66																		41576.2
				8141	8888.22			86663.7																		17285.5
				5907.58	326.03			9568.11																		73933.7
				8638.42	108375			88598.7																		46380.2
				20264.3	59.19			34333.3																		14774.9
				12160.7	220.44			65928																		28730.6
				684.79	14526.3			69913.2																		105294
				52767.6	17849.7			54693.6																		50446.7
				49696.4	270.21			7290.19																		43643.5
				66182.5	430.8			68147.2																		59648.4
				18866.6	30133.6			71081																		113409
				57363.7	5464.05			23699.3																		4304.61
				76819.9	23163.3			5267.91																		111833
				661.59	73615.4			22138.7																		58362.2
				278.13	36087.1			6576.37																		31582
				24969.8	16669.6			25284.3																		105747
				25838	272948			31176.7																		102266
				105103	205891			26593.4																		1177.42
				66965.6	147479			24767.1																		17552.1
				13863.3	181662			42559.2																		63289.2
				26817.3	86043.2			30766.4																		56.05
				73762	80303.7			43883																		124753
				25618.9	210782			21432.2																		22239.1
				31625.6	120157			20614.8																		875.9
				38319.5	149958			3087.41																		4850
				22217.1	172737			28101.9																		3741.51
				26294.5	120600			3628.04																		486.72
				15191.5	256360			15616.5																		2953.84
				22543	33973.9			25353.9																		5038.83
				40437.4	144916			19420																		1382.01
				35728.1	24223.9			15498.9																		314.49
				39987.4	139196			56645.6																		130.91
				15053.9	3203.11			17577.6																		150.86
				38558.5	76225.5			65499.5																		704.89
				24026	34.07			36355																		778.01
				28285.3	144.72			64257.9																		337.5
				15261.2	36006.8			22460.9
				30291.1	417.44			36548.9
				23250.9	8446.16			2864.93
				15538	12600.4			38766.5
				13152.4	10752.7			49853.2
				14170.9	3622.19			1987.88
				40239.5	306.13			18117.7
				72771.9	113.72			29172.2
				34264.2	54.51			4017.66
				107869	611.96			16079.5
				122785	35005.5			11932.5
				137102	46814.1			38176.1
				118683	3.58			53637.8
				33351.3	48606.6			18319.1
					30.42			53773.2
					18747.1			59887.3
					30170			28386.5
					28820.2			69287.4
					6509.09			8333.62
					78.34			32788.5
					55615.9			5638.18
					56636			45633.3
					620.66			33835
					17.8			25432.5
					1513.59			23018.9
					48452.6			62272
					64958.6			22369.9
					27126.9			9890.93
					41634			52099.7
					53.5			12240
					114942			30439.9
					178062			25090.7
					65341.8			69862.2
					59972.1			40010.2
					128913			15790.4
					23647.3			54142.5
					50476.7			77241.4
					72588.4			59903.5
					4157.5			8988.91
					614.01			49172.4
					32416.2			63641.8
					162403
					106170
					592.34
					8562.01
					5518.55
					87385
					112297
					115232
					323.51
					64440.1
					118.39
					166.29
					768.19
					1563.9
					195.99
					3.08
					6
					24263.3
					5225.07
					315.79
					30.02
					2571.85
					8543.15
					24096.1
					13148.7
					21089.2
