# Supplementary material for: HIV-1 nuclear import in macrophages is regulated by CPSF6-capsid interactions at the nuclear pore complex
Source: eLife. 2019 Jan 23;8:e41800. doi: 10.7554/eLife.41800 (PMC6400501; doi:10.7554/eLife.41800)
Supplement: Figure 3—figure supplement 1—source data 1. [file elife-41800-fig3-figsupp1-data1.xlsx]

## Sheet: Fig 3 - fig supp 1A
Mean CPSF6 intensities per cell all wells - Related to Figure 3
	Donor 1			Donor 2			Donor 3			Donor 4			Donor 5			Donor 6					Statistical significance
	NS control	K/D		NS control	K/D		NS control	K/D		NS control	K/D		NS control	K/D		NS control	K/D				Table Analyzed	CPSF6kd Donor1			Table Analyzed	CPSF6 kd Donor 2			Table Analyzed	CPSF6 kd Donor 3			Table Analyzed	CPSF6 kd Donor 4			Table Analyzed	CPSF6 kd Donor 5			Table Analyzed	CPSF6 kd Donor 6
	140.634	120.442		147.254	183.652		154.697	20.2533		114	25.643		195.816	79.2909		141	72.4008
	124.532	102.335		163.919	21.7919		141.017	46.4479		123.121	61.2473		198.789	28.8229		81.7009	50.5546				Column B	K/D			Column A	NS control			Column A	NS control			Column B	K/D			Column B	K/D			Column B	K/D
	109.23	20.945		201.453	35.228		82.5438	22.6041		86.2661	87.5298		126.981	46.9969		176.3	49.325				vs.	vs.			vs.	vs.			vs.	vs.			vs.	vs.			vs.	vs.			vs.	vs.
	156.938	35.2667		170.326	196.246		86.4494	12.5729		114.97	66.3431		123.624	19.5046		140.411	16.1335				Column A	NS control			Column B	K/D			Column B	K/D			Column A	NS control			Column A	NS control			Column A	NS control
	58.0769	76.8951		217.008	13.2461		57.1761	16.2011		100.397	34.3757		178.823	51.3619		81.5094	34.8754
	133.15	111.017		135.483	106.787		117.271	13.5811		105.231	82.3218		181.821	42.0574		63.3926	19.7073				Mann Whitney test				Mann Whitney test				Mann Whitney test				Mann Whitney test				Mann Whitney test				Mann Whitney test
	8.47984	13.5762		18	13.5106		157.331	86.2711		78.7527	70.5065		191.851	75.9868		48.8037	31.9499				P value	<0.0001			P value	<0.0001			P value	<0.0001			P value	<0.0001			P value	<0.0001			P value	<0.0001
	5.93375	19.2646		25.0706	42.0974		62.6496	82.3967		114.339	62.4286		119.567	87.0111		61.6311	48.2206				Exact or approximate P value?	Approximate			Exact or approximate P value?	Approximate			Exact or approximate P value?	Approximate			Exact or approximate P value?	Approximate			Exact or approximate P value?	Approximate			Exact or approximate P value?	Approximate
	161.749	64.9971		139.306	31.7		74.8815	55.6024		127.125	16.4615		112.194	17.2893		285.526	50.2414				P value summary	****			P value summary	****			P value summary	****			P value summary	****			P value summary	****			P value summary	****
	64.3644	97.689		155.051	31.1431		51.6566	133.324		115.72	17.4541		197.663	32.4721		160.378	49.4673				Significantly different (P < 0.05)?	Yes			Significantly different (P < 0.05)?	Yes			Significantly different (P < 0.05)?	Yes			Significantly different (P < 0.05)?	Yes			Significantly different (P < 0.05)?	Yes			Significantly different (P < 0.05)?	Yes
	243.752	45.6491		208.254	123.086		72.3811	22.753		119.884	34.6478		117.634	102.403		175.422	42.7605				One- or two-tailed P value?	Two-tailed			One- or two-tailed P value?	Two-tailed			One- or two-tailed P value?	Two-tailed			One- or two-tailed P value?	Two-tailed			One- or two-tailed P value?	Two-tailed			One- or two-tailed P value?	Two-tailed
	164.967	102.591		122.211	144.951		81.2953	8.67667		39.9427	44.7489		216.438	67.6604		292.295	30.0035				Sum of ranks in column A,B	1677598 , 568542			Sum of ranks in column A,B	41975225 , 12987145			Sum of ranks in column A,B	148261376 , 77551750			Sum of ranks in column A,B	44614345 , 18268161			Sum of ranks in column A,B	121948356 , 50929360			Sum of ranks in column A,B	36855703 , 12392147
	198.506	51.4709		238.42	69.5924		74.9814	17.248		106.391	42.3321		211.081	142.523		234.11	17.5577				Mann-Whitney U	201746			Mann-Whitney U	6698314			Mann-Whitney U	29163547			Mann-Whitney U	2253191			Mann-Whitney U	10000732			Mann-Whitney U	2771456
	143.879	108.153		138.839	28.6424		66.4558	7.38658		120.971	39.1315		209.371	17.1108		198.049	107.809
	30.7028	102.527		145.557	147.94		80.8378	70.0906		104.313	108.009		167.97	68.572		84.7843	24.4232				Difference between medians				Difference between medians				Difference between medians				Difference between medians				Difference between medians				Difference between medians
	117.094	128.577		126.883	170.748		162.603	20.6965		138.433	19.2665		56.793	24.8902		80.7467	25.512				Median of column A	140.3, n=1263			Median of column A	139.9, n=6938			Median of column A	82.91, n=11414			Median of column A	107, n=5555			Median of column A	180.3, n=9547			Median of column A	106, n=5538
	150.993	22.934		170.279	170.703		150.651	33.1921		111.436	7.82534		187.303	17.6986		193.538	18.5158				Median of column B	77.44, n=856			Median of column B	98.63, n=3546			Median of column B	39.07, n=9837			Median of column B	40.27, n=5659			Median of column B	79.47, n=9047			Median of column B	42.8, n=4386
	24.5594	51.8387		152.985	32.3234		136.034	11.5037		141.678	32.9412		150.599	70.2478		204.663	129.919				Difference: Actual	-62.84			Difference: Actual	41.22			Difference: Actual	43.84			Difference: Actual	-66.75			Difference: Actual	-100.9			Difference: Actual	-63.2
	141.941	69.9805		194.809	35.9695		73.7345	105.501		86.2719	26.1663		122.058	29.3853		216.63	39.9177				Difference: Hodges-Lehmann	-60.92			Difference: Hodges-Lehmann	42.49			Difference: Hodges-Lehmann	37.68			Difference: Hodges-Lehmann	-65.07			Difference: Hodges-Lehmann	-96.03			Difference: Hodges-Lehmann	-61.65
	122.163	30.3386		168.866	184.834		65.7975	99.4281		125.012	95.2822		149.79	96.3723		77.9965	72.2257
	191.053	114.572		163.301	29.2701		73.8016	157.229		49.0598	55.3509		144.059	32.047		125.465	31.1757
	182.114	17.4985		155.498	136.749		65.2991	14.9347		146.964	76.1586		148.77	75.4617		136.36	39.477
	32.825	20.6139		132.331	20.1842		53.0034	43.7521		93.6517	33.6583		101.625	133.279		51.4457	58.5779
	152.173	62.6958		129.44	23.9548		152.665	38.1551		107.272	73.6557		199.722	114.139		155.235	39.6488
	31.3005	17.1518		55.4448	156.459		163.67	11.3027		98.9488	17.1889		118.598	90.6185		75.7758	9.6
	14.6519	84.7049		146.124	156.429		120.781	11.6334		131.392	48.864		151.149	53.4196		115.03	73.8419
	121.415	95.7355		125.927	17.9158		132.89	51.3525		103.551	21.483		146.936	115.099		76.3194	44.7733
	169.995	33.0164		131.037	16		89.8669	43.6053		182.032	12.728		216.547	88.0289		89.0628	29.349
	174.421	125.736		113.181	17.4704		46.3953	11.4613		111.664	29.277		118.605	57.0251		93.5725	59.2252
	152.601	17.9458		135.935	9.74576		62.3957	15.2977		129.159	19.5625		192.929	33.0836		52.9889	28.0405
	73.1859	105.879		116.631	86.4132		144.8	18.3661		110.831	45.3775		178.249	107.377		278.076	32.8293
	127.398	27.7816		144.696	223.994		88.7673	11.3473		117.933	13.3667		169.476	85.6927		52.1318	40.0225
	117.276	119.63		166.463	134.407		61.872	24.8419		161.487	16.5577		164.256	105.235		107.219	33.76
	109.273	77.252		137.57	87.9519		50.3311	15.5374		80.9937	19.7011		92.9966	91.0964		132.299	78.4931
	143.428	128.539		153.381	84.7872		74.8643	28.8656		102.997	13.0183		223.601	27.5144		91.8558	18.9639
	176.111	9.5995		180.028	194.057		82.3115	16.8581		135.718	24.8457		145.153	134.531		85.4206	32.9631
	129.326	133.623		154.399	14.6146		62.4498	32.7853		41.9179	26.0374		159.431	174.104		149.672	28.8113
	133	34.5144		67.3756	67.4785		49.4808	21.9698		142.813	37.4805		88.3709	47.9889		79.96	33.6496
	128.476	137.304		90.8161	146.851		68.0447	178.806		124.827	44.195		171.353	39.4179		132.894	43.5378
	165.249	111.429		83.2525	28.4119		146.304	70.8598		36.5067	79.8389		219.919	22.035		146.872	49.9346
	158.239	65.8635		146.179	136.881		62.851	11.0481		71.8028	19.3118		155.741	41.0641		129.596	45.8674
	155.604	94.7989		163.499	87.236		155.055	13.0368		115.878	43.3448		115.461	60.0276		63.7014	77.9612
	80.382	85.7622		128.449	5.93628		105.432	90.6442		114.741	15.2512		148.969	44.2367		150.761	54.7276
	175.959	112.486		37.4619	55.1121		67.6439	33.0712		144.141	11.1638		123.048	94.8789		68.5613	44.1052
	155.448	69.8266		13.1333	49.4467		70.221	9.337		103.877	50.4314		235.165	153.069		198.098	36.9828
	164.546	73.5506		121.253	116.755		81.3237	76.9867		110.374	16.2469		150.617	40.9488		189.411	35.7973
	165.142	26.4194		96.8637	169.549		70.4667	15.6506		114.113	81.6247		97.6433	55.5866		127.199	32.9136
	159.457	133.849		191.204	146.62		67.5994	98.5351		92.1196	96.9773		138.43	66.2871		57.1843	57.0674
	173.561	41.7029		122.144	133.317		86.792	63.1976		87.8133	46.0878		138.522	77.8213		102.425	34.0814
	138.705	97.4077		127.092	58.6416		145.509	71.8272		121.893	43.5972		103.333	28.8		79.9012	49.4044
	178.665	122.425		159.79	101.733		65.6827	62.1796		100.921	21.1098		138.233	113.1		80.361	17.2368
	147.763	70.9188		142.206	146.6		37.0068	9.07718		92.8281	25.7586		128.22	24.7492		47.9429	37.4087
	158.037	14.1032		159.416	15.4961		81.0533	153.13		98.0668	19.5866		218.286	31.252		127.902	13.628
	107.653	19.9945		224.492	74.2475		47.4373	83.0656		89.6868	11.4983		177.043	32.8362		125.433	52.9316
	169.332	32.4418		176.428	119.163		69.5417	12.2141		108.995	40.1205		197.179	98.8288		88.4699	30.8761
	158.555	21.8468		207.069	3.70039		143.356	14.481		120.427	22.762		124.625	48.4718		62.6183	9.86691
	151.192	31.2727		175.409	7.72199		67.788	89.9163		127.556	48.7571		189.7	26.3687		162.644	7.74621
	123.15	16.1866		148.728	6.37063		158.688	61.414		143.02	21.1351		166.397	144.836		159.891	19.866
	161.071	114.72		179.058	4.76513		142.281	22.8455		140.202	27.3768		201.929	130.695		177.282	36.3333
	207.811	40.3586		144.532	3.24919		70.5685	57.66		116.455	28.3014		104.228	86.8333		104.588	52.2253
	192.734	152.561		182.588	15.3167		60.1972	30.616		129.062	15.4234		114.578	103.057		59.2356	39.3852
	149.938	134.852		148.527	17.9393		114.069	12.659		104.528	5.93727		143.305	88.8805		148.114	26.8493
	157.512	20.1827		219.96	8.29197		45.3813	30.4318		102.398	27.5582		183.62	114.713		126.245	28.5663
	152.548	125.29		209.559	10.0907		104.076	18.6154		95.1165	22.7324		116.499	95.7576		153.652	66.6731
	148.346	28.281		218.91	4.08519		153.709	20.4587		117.218	28.176		238.542	88.21		64.464	37.9646
	120.61	136.065		178.162	11.9488		140.771	13.4403		109.573	31.9573		125.353	64.3015		59.6247	43.0325
	191.076	60.689		150.322	94.347		62.7243	10.4368		108.725	24.9151		153.429	25.8027		103.596	64.9614
	162.96	152.851		138.97	6.66667		76.297	10.0165		99.1076	20.6328		168.791	47.9964		58.937	43.4696
	143.526	132.738		168.481	14.8814		63.2119	13.9934		106.228	23		192.033	52.7587		107.931	50.2514
	110.37	14.5802		175.475	14.7013		58.8609	6.82949		39.8973	8.3125		69.8267	73.6655		45.5498	39.6107
	171.691	54.7495		70.9664	149.218		80.2455	9.27273		113.84	32.8373		169.335	36.907		189.611	68.609
	170.517	37.5336		203.025	5.188		141.166	25.7686		111.65	77.0024		159.405	71.2919		139.003	39.4417
	147.05	26.3505		90.7324	16.1911		70.5714	34.9439		104.851	19.7138		140.307	75.7315		218.992	22.1527
	149.284	71.9789		97.6025	11.2358		81.9568	10.713		93.073	25.3993		279.913	110.108		42.4474	13.5468
	39.8841	87.1683		164.775	44.0097		58.2635	23.2166		124.851	54.2836		141.467	57.941		137.86	11.8029
	137.662	97.7229		140.678	48.9533		45.3838	160.347		121.122	9.78851		149.603	83.2078		93.7472	67.2301
	188.037	49.6645		159.181	101.966		84.04	21.0269		109.869	40.6449		119.986	67.2127		220.045	42.1424
	139.819	51.4046		121.644	130.596		47.5885	8.96053		77.1744	27		238.908	29.5636		336.321	7.19502
	133.747	7.76768		79.0985	40.4765		45.8345	55.4869		124.231	35.4428		124.89	107.482		181.129	38.3242
	165.219	8.6		89.8218	131.242		67.9763	19.0232		113.169	20.7518		157.499	14.0438		57.8997	64.5112
	135.598	40.8258		143.357	108.256		60.0213	61.5623		92.6363	16.2128		202.177	33.093		245.94	85.3319
	115.574	84.3798		135.596	96.9388		81.3196	79.1972		99.3598	97.9551		104.022	50.309		171.783	40.0936
	117.329	82.8145		189.46	130.213		31.5954	25.041		125.044	23.9876		189.562	57.4917		83.5424	12.9545
	149.532	101.722		158.131	38.0347		49.6773	47.1317		95.4252	42.5565		119.219	46.4591		59.4053	19.9194
	163.338	13.5098		227.222	115.215		45.8815	11.144		6.23904	22.4773		95.0247	62.3047		134.19	46.0202
	140.937	136.784		135.814	130.361		50.9353	18.4583		98.8755	66.375		157.949	64.8987		97.713	18.805
	150.984	13.1375		190.463	19.9483		85.3939	15.7024		101.819	30.3615		106.206	50.8412		94.6336	50.367
	164.877	17.3974		164.977	21.763		60.7166	11.9611		99.3404	28.1548		122.398	20.5649		80.9525	15.57
	158.345	99.3912		192.904	15.284		57.8973	27.8647		89.8187	21.75		155.936	19.8561		109.908	73.8301
	215.997	40.9368		151.471	139.938		27.6864	10.9203		141.186	17.9421		160.603	89.3708		86.0194	7.34639
	161.541	80.3923		144.558	110.134		46.6878	17.2229		116.486	41.6131		156.846	87.6152		226.606	37.4686
	128.568	116.521		72.5498	154.116		65.3324	15.1568		125.611	13.1941		143	70.5105		113.486	48.8582
	183.521	54.1763		69.1391	166.111		59.0608	12.6447		98.7133	10.6751		157.478	92.4458		110.959	29.1602
	141.807	61.2154		173.488	83.9135		68.801	26.79		98.6135	61.8395		128.032	113.371		171.739	39.4419
	162.331	86.1765		154.442	127.322		44.5776	68.0566		105.715	20.976		142.742	18.6878		126.225	42.4582
	194.608	115.219		146.721	123.743		56.1903	37.8321		134.815	19.0145		182.298	30.8155		105.829	38.3401
	219.052	102.072		141.256	48.6561		77.1617	45.9058		111.969	27.024		175.357	179.375		142.283	33.7544
	162.968	184.621		107.304	147.901		26.4048	10.8156		38.773	52.4482		172.714	63.0593		114.306	37.9515
	103.088	59.4419		155.77	62.4055		64.1003	14.4691		105.379	34.3908		166.011	32.2186		102.459	64.0383
	131.341	12.4759		6.85653	69.4718		80.5961	49.8353		154.085	25.0221		123.871	128.99		71.8607	13.6157
	173.841	32.6279		171.12	17.6445		73.0823	44.5107		121.147	82.7801		130.851	21.5298		123.553	42.8707
	191.745	172.236		165.35	18.7325		52.7484	98.4587		118.456	8.07292		239.689	123.131		234.634	37.522
	235.73	110.912		212.256	180.113		60.8298	50.7258		131.757	34.8431		120.599	50.8464		208.736	50.9255
	127.075	39.9971		24.4134	40.0541		71.5362	66.0072		80.4717	27.805		175.623	66.1831		96.1535	16.1924
	155.293	153.016		144.401	18.7298		118.317	130.158		123.341	6.44032		152.031	124.339		117.009	8.65397
	141.128	118.152		86.9906	28.415		179.107	11.2231		100.034	19.1749		86.1847	21.3301		123.022	39.9094
	167.54	71.4535		160.947	168.732		133.305	10.7517		106.203	5.11151		159.528	75.1372		149.145	18.5323
	239.803	30.6244		180.021	116.097		84.7625	98.1994		103.973	23.6906		148.5	257.272		126.338	42.0335
	109.216	103.247		169.412	20.1844		87.7829	12.8734		105.237	11.6826		168.177	115.89		129.534	23.1621
	113.921	99.6623		202.203	32.4751		75.6754	20.359		99.0503	56.9758		125.548	28.2396		108.294	24.1759
	49.8762	38.7161		90.693	109.495		62.6064	134.962		117.092	21.6749		145.092	66.883		110.281	65.2962
	176.371	8.46703		192.602	12.096		60.8699	140.481		88.1302	44.4079		86.2435	57.8353		114.714	19.5483
	139.207	133.561		107.385	147.505		71.4536	19.0192		86.1597	24.8102		132.505	21.7347		55.1658	66.545
	181.069	32.8214		206.599	78.1931		43.3622	15.7513		131.236	21.6616		132.529	42.553		161.504	24.639
	153.211	30.0879		124.64	170.92		56.1605	31.3142		122.784	77.3216		204.835	33.007		125.284	39.4452
	109.473	48.6853		73.293	90.7239		55.4699	79.4167		102.861	32.8441		145.325	84.6261		48.9783	50.8075
	68.7657	125		179.759	8.79481		79.8084	18.1749		92.0932	45.1496		76.2417	26.4642		116.356	75.4883
	195.835	51.3363		102.141	125.735		67.52	139.193		67.2404	14.0953		131.829	38.4919		140.657	24.6826
	248.378	41.1092		119.766	132.45		64.4188	91.117		109.11	9.66265		123.634	145.583		43.0091	73.6971
	171.556	104.935		12.5366	37.7417		162.161	7.40045		87.3736	22.4717		165.531	28.5768		83.8105	69.3109
	197.078	30.9943		126.26	64.4478		76.8174	14.3926		111.588	49.571		154.868	66.6912		56.2525	40.32
	135.009	107.129		117.63	18.4558		62.7855	25.6189		171.97	26.1991		179.014	44.2651		229.842	42.4107
	71.7252	42.7537		166.454	51.8932		80.0909	12.7756		93.7929	93.3995		140.889	70.9027		22.1478	43.7672
	211.979	74.4797		152.824	131.651		67.5841	11.8196		105.6	61.6004		137.574	130.63		116.437	35.684
	151.859	113.155		156.379	159.769		82.4142	39.8252		167.7	32.5851		73.1959	80.9723		161.528	10.3323
	127.351	18.6055		96.4693	142.398		26.2948	63.6683		129.264	19.6604		198.825	65.0751		84.1642	69.8435
	205.175	116.165		100.702	74.3769		54.1752	79.0743		150.664	26.0476		136.385	18.9213		197.224	34.3322
	182.032	19.5588		196.397	105.1		68.3772	60.8618		124.946	29.3304		106.253	74.6016		125.229	115.044
	225.397	26.1729		105.436	64.7949		73.8913	10.6388		76.9833	18.7562		113.492	115.153		155.789	24.5568
	177.784	9.19331		73.0616	61.5593		63.016	8.74286		88.5432	10.2286		108.044	118.517		142.988	47.2824
	174.224	16.2589		99.0791	75.8321		55.398	6.68456		97.0253	27.873		179.182	41.4324		123.446	77.0919
	187.638	91.0798		150.318	62.6915		38.3138	19.137		99.9039	25.6493		197.116	94.5746		67.5691	24.7735
	151.698	110.421		129.627	10.5262		67.8834	16.7657		77.15	66.9531		241.39	35.6708		79.9897	9.48089
	188.812	15.4511		102.995	7.57478		86.1134	10.2581		174.27	24.1531		202.742	31.5127		83.0388	48.36
	158.492	112.262		160.694	155.627		66.8448	34.6904		113.836	32.4481		111.42	95.8333		67.0077	47.2918
	202.136	82.7869		165.33	88.75		53.5279	80.4902		23.3426	45.4295		187.153	156.71		345.012	45.3346
	156.779	86.3199		162.022	7.23614		61.3118	12.9916		89.3435	26.7011		172.338	26.402		140.38	9.00557
	145.656	54.6196		159.915	26.2736		74.4881	60.4912		81.9909	18.5036		207.04	31.3095		175.368	54.2413
	68.8944	132.511		109.983	40.9748		47.8678	11.6547		101.194	27.3246		207.221	73.3878		64.2549	33.0653
	165.87	31.6779		158.077	163.148		72.1203	36.2714		133.8	31.4242		172.597	109.365		74.9188	39.6219
	241.614	80.2414		168.333	144.645		62.6587	62.2049		102.037	30.7847		173.507	87.919		116.565	43.7617
	176.852	114.075		132.71	90.8585		78.7618	26.4097		120.859	18.0077		85.2857	111.141		217.449	38.0696
	149.862	17.9689		207.807	54.818		79.9247	145.525		73.1744	17.9798		222.545	73.6511		154.522	107.753
	158.885	34.8248		148.316	159.228		56.2466	56.48		46.132	48.7664		163.538	189.869		158.396	57.0909
	248.268	39.2673		119.998	85.0568		56.2374	23.5502		84.7679	17.2444		198.908	170.602		120.201	40.5244
	154.739	141.874		178.552	112.913		44.1429	12.0771		147.3	18.8893		137.63	130.797		85.4227	14.5575
	161.535	133.511		152.258	116.834		56.4975	19.5851		100.423	41.7842		163.753	117.08		144.096	49.7981
	13.465	146.829		91.4439	12.5519		63.0672	32.9657		111.334	10.6135		185.736	148.823		80.1527	49.9271
	83.1375	17.1622		163.681	173.321		56.6983	73.7116		136.945	27.4972		188.144	132.38		106.668	54.2568
	157.23	109.961		122.191	28.3564		75.997	21.7464		100.93	23.7711		176.38	55.6018		115.081	45.8195
	76.318	69.0411		146.995	32.7645		102.121	52.6435		111.493	5.60734		134.595	67.6561		94.7727	46.3781
	121.506	161.673		145.238	5.63604		68.9057	19.9003		136.659	26.2315		260.828	80.85		161.065	14.8967
	16.0189	132.291		193.905	75.3881		61.3571	18.8614		96.1078	21.9859		162.634	134.399		102.136	20.5238
	143.869	91.2566		134.258	83.7802		51.3295	99.5676		119.335	10.309		283.629	65.0055		137.387	115.608
	165.273	120.734		77.7226	157.841		42.9181	40.25		103.886	43.4044		174.446	26.3425		157.479	38.2557
	113.305	66.7111		216.5	156.264		60.488	16.8421		101.626	22.5062		127.553	36.2739		64.1796	59.0368
	110.666	30.847		23.1101	168.917		82.0578	25.226		99.4169	26.5058		154.502	118.374		113.712	44.9293
	165.578	124.132		135.851	22.7995		197.11	14.1855		107.691	65.3577		138.122	44.7418		189.946	96.511
	124.586	63.8347		173.902	108.666		54.6613	86.6693		98.9713	49.0071		156.344	116.072		114.481	53.2776
	112.122	67.6673		94.8824	87.6964		65.4408	7.75852		55.1646	39.6393		207.565	92.123		145.359	38.4536
	131.903	156.118		169.937	144.328		68.784	35.5991		89.8893	19.6936		150.46	82.0708		206.516	73.8375
	170.227	147.512		127.358	29.7222		82.9038	16.1743		113.129	18.8671		257.948	29.0395		70.3837	41.6056
	178.667	54.7891		173.27	106.24		77.7316	28.913		100.369	37.3157		250.042	116.942		109.728	43.5522
	169.974	104.765		167.236	37.273		49.1456	12.0291		175.026	25.9657		187.063	21.8271		86.5613	25.7413
	14.396	124.472		166.185	135.46		121.649	64.1582		137.745	27.7314		176.632	30.6678		97.4978	45.6951
	167.082	100.011		139.571	40.8313		66.7317	13.295		105.551	10.2266		127.877	26.5328		106.03	49.174
	179.703	19.7166		158.617	49.6239		35.2669	25.0588		96.5708	43.2734		142.251	71.0023		126.343	47.7737
	169.059	135.95		154.032	169.803		125.237	16.0782		123.26	19.7382		204.302	45.8704		194.321	34
	150.99	109.233		150.763	45.5097		85.0345	12.1846		96.9612	22.6899		321.263	34.8851		56.3324	45.6457
	127.153	177.618		171.357	108.044		148.014	23.888		157.336	20.9818		169.454	116.825		80.0191	55.9009
	122.2	45.8746		80.5052	131.386		56.1187	23.3343		102.157	27.3035		156.404	105.098		108.189	37.5492
	187.793	104.133		168.799	101.014		73.3038	7.16562		137.77	99.6509		99.176	93.6667		80.758	46.9917
	198.762	107.613		194.13	204.006		39.8529	74.5918		115.374	24.0836		190.059	116.103		158.869	31.6
	143.878	31.0031		170.265	116.101		68.7685	118.665		89.792	27.0458		148.571	98.342		72.7812	27.6356
	197.79	180.487		88.4026	12.4181		59.6456	29.1832		129.433	18.3399		174.147	62.6953		50.8214	24.0401
	165.098	114.907		105.662	66.0409		55.6237	76.4573		121.529	96.9689		240.379	40.1093		46.6484	13.5081
	154.586	54.6233		130.498	11.3864		58.2532	15.9129		91.1246	19.1196		245.176	45.9441		121.706	52.7659
	104.42	147.739		52.0082	57.3101		63.1695	65.8271		109.113	19.6012		165.741	108.563		140.609	41.7955
	105.048	113.176		221.86	102.359		62.5977	122.988		126.497	117.483		40.1554	27.3173		114.224	54.9877
	144.934	99.2987		119.407	179.851		83.5868	54.8477		86.0643	31.9974		183.395	96.4967		164.596	42.2888
	194.161	23.5088		170.986	49.4591		126.451	31.3048		84.6704	40.7596		175.678	131.113		105.176	103.569
	194.232	120.97		154.654	115.642		62.0836	142.29		82.7774	49.7822		187.552	63.8731		96.2966	39.2036
	107.184	79.9399		155.257	112.754		63.2607	112.127		125.821	66.5828		112.24	165.614		101.485	8.27978
	8.24231	149.076		141.891	67.7828		43.6063	147.58		125.314	25.7105		119.731	195.826		70.3536	50.3739
	82.1524	13.9471		130.31	109.87		60.9331	107.035		97.6412	85.6313		207.244	65.4532		31.4158	57.9542
	202.907	64.9696		23.7556	104.832		80.1163	112.049		87.8933	59.4204		206.357	53.1114		61.5746	62.4646
	107.887	62.7829		150.947	21.5652		51.897	20.5454		131.482	91.9239		211.429	165.388		165.496	48.8132
	167.684	55.1053		166.075	16.7806		66.0516	174.364		133.192	23.974		105.34	38.6866		124.147	21.2745
	26.4779	128.819		96.5019	17.6855		48.827	29.9619		100.615	26.4089		117.284	36.599		134.476	33.1579
	147.088	118.549		135.309	21.6803		46.9157	19.0457		84.2362	41.1239		139.96	71.1438		124.555	43.7399
	16.7611	42.787		129.235	148.22		52.9609	61.5551		109.933	79.9607		96.5815	138.022		166.003	79.2698
	6.70863	170.049		113.956	103.342		63.3328	19.9596		129.304	29.0935		192.168	116.566		125.583	69.4915
	5.55312	133.334		188.589	19.1846		105.188	79.7405		113.712	40.4669		192.664	44.1136		116.312	58.6931
	113.682	12.2919		129.409	135.534		85.9088	13.6667		101.819	44.4986		135.72	61.8453		89.7081	91.6589
	84.711	45.3396		196.528	120.479		28.664	102.9		64.1432	19.0722		138.881	164.79		64.6667	97.5882
	168.046	108.218		89.3417	124.512		49.0378	74.1522		98.2272	29.2902		90.8068	111.887		84.276	52.3708
	112.062	88.7636		183.103	60.9658		36.7273	24.8944		147.432	21.284		241.074	68.1965		117.464	42.1365
	88.0282	111.515		142.477	46.3085		68.3386	21.2214		116.468	24.3958		154.684	19.8116		89.137	66.604
	140.874	55.9179		127.021	142.085		89.68	5.184		147.045	29.7214		154.615	49.8148		135.88	63.3529
	237.668	94.037		128.736	123.228		62.9429	120.747		119.674	16.9471		178.079	73.9745		52.2155	49.4815
	135.231	134.163		125.297	27.8721		56.6333	25.6215		122.326	68.9974		118.016	31.5068		159.536	64.2338
	109.627	62.3639		150.3	28.5658		66.8889	20.3381		108.722	37.0115		123.894	35.9602		133.72	52.502
	84.3042	103.329		145.73	28.3079		80.2713	12.5287		148.604	19.8033		178.481	112.581		170.249	46.4761
	80.2617	12.3204		141.734	8.93249		122.158	5.65428		108.427	39.2852		114.555	94.2902		133.416	51.9114
	45.5025	67.0373		128.642	62.244		82.1104	14.0905		136.631	38.5122		118.016	53.4257		157.435	40.0489
	50.1889	144.677		186.703	13.4803		74.5094	55.3065		139.18	17.766		74.3849	67.8		95.3802	24.6692
	102.294	117.353		138.833	130.791		78.1337	139.951		99.0615	52.298		97.2771	41.2197		97.1592	40.1929
	2.61628	85.1028		144.637	120.347		76.1458	10.6325		139.661	11.1271		139.033	109.29		80.0433	50.6159
	134.177	129.81		148.395	119.017		43.6807	122.801		73.3344	30.558		98.0803	14.9929		75.2759	47.1889
	198.496	173.07		130.796	29.2562		76.5896	8.46482		99.6821	34.6159		165.788	82.1757		55.3935	50.3915
	161.456	35.2151		145.47	135.67		45.9346	116.564		105.285	73.8885		145.033	26.0622		170.359	39.6753
	168.57	10.0759		138.986	15.8611		96.8736	97.3703		108.845	16.0435		156.516	31.0489		244.853	47.5458
	116.97	26.5593		153.523	8.69278		139.91	154.14		95.5031	35.3433		100.807	19.89		124.425	8.77083
	156.16	75.0353		172.182	9.76498		76.7184	140.045		136.338	54.6744		133	47.5293		75.5234	45.8617
	98.0468	31.7934		135.403	68.0633		73.7178	144.387		52.3828	9.57438		132.344	73.5488		51.7641	38.2756
	63.2454	123.36		174.415	146.167		83.0779	35.2073		126.404	85.9602		131.889	48.3921		128.552	26.093
	111.459	78.7808		179.929	12.1941		74.0988	14.7631		130.812	42.9486		164.78	24.9589		85.7928	15.3766
	149.154	19.052		139.72	27.5777		74.1699	32.7922		109.491	19.1011		154.039	77.0021		105.971	36.0511
	73.8704	100.179		188.601	123.141		131.879	14.8986		142.812	30.4573		174.166	215.463		175.554	59.7596
	138.647	82.4613		173.217	16.2098		74.9316	121.66		105.901	81.5603		191.491	20.7699		147.499	66.4727
	165.333	52.2902		182.301	130.678		70.0031	34.3548		110.752	16.1667		144.443	172.651		129.894	42.986
	128.266	92.2779		180.879	118.423		66.9786	114.166		107.111	16.3333		135.416	34.0542		87.459	31.7157
	187.638	15.211		95.4252	15.5339		68.3447	80.0119		81.0343	52.6075		199.571	54.0565		125.562	35.8865
	157.166	25.2887		100.052	11.8653		100.63	17.1189		86.3007	19.0628		171.101	53.3881		155.906	93.0771
	144.501	31.0909		130.369	50.4524		95.3294	46.4358		95.6948	82.2744		179.418	105.588		114.359	58.1365
	176.978	98.35		122.404	42.2		121.899	23.7264		119.165	25.0194		99.5722	34.3571		78.3968	6.50169
	136.655	53.5844		140.147	117.914		73.5206	18.739		140.022	39.3007		185.359	58.187		163.703	50.0993
	177.605	50.581		159.175	44.5489		77.8333	92.4311		116.848	34.3343		127.558	121.509		51.468	34.9148
	192.847	9.23977		210.026	66.2023		56.1742	89.0496		133.057	29.3195		82.7062	27.8053		85.4763	29.7992
	207.938	31.1506		211.574	192.138		92.3262	21.8109		133.686	32.0326		182.985	95.9811		112.881	61.2447
	213.912	57.674		187.864	127.587		79.9795	28.1329		108.697	32.3905		132.229	130.444		72.5216	39.1465
	168.765	96.0087		12.2742	31.6598		69.0028	11.3717		119.481	8.03556		169.701	86.3094		82.9922	13.579
	205.949	25.3476		174.454	46.1138		57.625	13.088		150.184	91.6615		197.145	42.1488		66.0871	39.3318
	98.5013	13.1342		174.077	95.1927		60.9294	36.7485		154.219	32.376		141.607	87.5189		87.905	47.0156
	185.688	137.735		200.086	123.343		92.0882	98.4912		119.129	54.7862		194.776	84.1351		144.516	14.8385
	133.493	112.563		153.98	119.73		75.3234	21.6717		108.069	15.926		162.268	47.1553		102.948	23.417
	171.775	51.3844		106.554	153.943		140.205	90.9605		151.55	24.705		230.244	21.3159		64.3244	47.6506
	86.8262	78.8989		119.391	62.0209		73.4123	178.534		90.5067	42.699		123.954	221.005		109.694	21.1863
	186.128	96.8278		116.821	105.983		170.564	16.3134		123.944	37.3424		117.936	38		241.531	20.076
	87.6296	115.91		92.555	89.8165		67	17.5056		93.8837	16.3636		121.584	40.2576		137.51	46.6633
	199.54	98.3872		100.467	72.5		181.509	23.67		98.3275	32.9595		175.571	95.4429		122.253	45.2902
	77.8688	81.7984		88.3704	131.147		72.6299	22.1562		106.947	45.803		187.339	132.936		98.4477	40.0451
	150.871	76.7454		112.559	14.1355		104.636	37.7373		70.5604	21.4621		161.944	27.9278		105.571	16.6636
	181.122	37.1008		167.432	100.22		64.2696	13.1801		134.468	41.146		158.907	81.085		118.05	12.2429
	144.954	9.71854		113.615	131.286		48.5458	36.2251		137.925	31.6117		144.3	45.604		73.1868	42.0037
	145.575	43.7705		136.856	26.5165		38.1014	61.5556		97.7486	23.62		115.843	36.2246		182.452	14.9372
	128.071	128.876		143.145	12.9475		53.2924	23.5706		77.6179	31.8841		115.364	130.715		117.442	39.5085
	159.309	30.1711		186.228	11.0622		41.442	130.045		93.9719	36.5049		141.49	137.974		154.528	36.9144
	154.553	74.436		137.272	107.381		60.7644	13.2035		141.021	93.8605		191.195	102.865		134.391	43.7
	137.761	21.5156		172.667	131.323		49.6727	48.9511		116.321	43.8585		163.872	45.7098		198.699	14.194
	214.719	74.9059		142.776	119.291		45.6948	17.9614		98.4316	81.3895		124.411	114.556		103.22	46.331
	197.462	110.738		146.308	111.679		64.5931	12.9824		105.256	56.9329		216.487	40.3082		103	22.3354
	155.152	146.765		120.025	28.8908		79.223	10.3148		115.659	51.8617		148.514	107.628		138.356	12.4355
	207.321	179.597		171.006	7.10733		62.108	17.3517		115.15	62.2803		261.57	20.9241		215.406	76.3279
	78.9688	134.494		140.786	116.702		65.432	138.739		40.7713	10.9869		269.448	60.2766		252.375	46.9384
	91.2747	106.269		144.819	143.834		92.5117	19.1349		126.489	7.96654		212.777	45.7855		121.131	40.6937
	75.1157	26.2773		162.268	94.2784		91.4703	26.5569		88.604	5.86975		148.547	55.764		114.357	47.8223
	155.79	84.0746		166.181	185.596		101.876	75.3907		129.93	61.2627		101.63	68.7432		156.459	39.2588
	169.575	144.436		88.8756	92.6813		85.137	64.1214		138.345	56.6533		130.885	134.636		126.88	72.8013
	134.851	90.3609		153.975	120.023		124.539	133.176		103.852	57.8343		207.919	79.7984		144.044	82.9419
	219.047	103.418		158.97	41.0081		65.7289	127.899		107.235	8.8018		181.016	29.7057		73.8066	62.9483
	160.722	20.0026		109.596	49.3876		142.33	123.244		117.815	97.5994		195.687	32.5801		147.427	15.8109
	216.404	127.599		160.279	155.02		6.52778	160.863		107.874	43.9024		180.373	113.077		80.5719	74.9923
	119.063	73.6514		176.545	46.6171		42.873	24.7541		81.3646	60.6753		98.371	23.3053		135.583	56.2312
	220.967	98.4304		57.2918	32.5373		154.394	20.0085		91.7533	101.244		180.754	108.448		201.927	40.3506
	195.477	92.8872		156.008	72.8221		36.9363	61.4045		127.879	20.0633		151.115	37.9135		108.809	13.7273
	177.735	120.247		194.28	143.56		52.4291	15.1446		117.184	18.2622		63.9594	18.3938		26.4703	51.9221
	132.964	107.7		224.715	134.233		140.795	167.322		82.2422	56.998		187.612	71.5517		259.875	58.2252
	29.7282	61.3369		179.919	55.473		79.9821	11.0378		99.4744	67.0246		80.3451	59.2503		177.615	51.3456
	157.981	114.361		197.368	100.821		74.5056	171.119		143.924	13.0374		191.204	32.3878		68.2303	22.5752
	187.898	129.541		136.765	10.3087		76.9112	109.105		123.391	14.11		221.009	66.5019		104.544	62.5061
	178.376	78.9662		120.279	5.48551		141.376	80.9762		84.537	51.7136		178.643	64.3175		59.5403	18.3584
	226.07	81.3628		121.175	15.8563		141.652	20.6214		124.01	16.5614		294.121	119.097		89.8396	27.3125
	149.59	91.7778		144.872	188.768		74.3221	75.8706		111.634	40.4886		185.961	108.11		62.4251	48.0641
	91.1958	151.362		194.702	131.99		59.4697	114.101		105.092	25.0195		199.228	137		63.5877	25.988
	130.264	140.944		205.06	8.56679		147.575	18.5483		122.929	29.8775		228.213	43.2727		45.2966	14.8947
	82.4349	74.41		197.921	77.9066		67.4127	53.7256		121.171	16.9302		173.313	31.1635		66.4138	40.251
	176.264	84.0759		175.438	133.874		60.2813	137.762		132.325	16.9087		197.317	30.3115		110.953	39.8683
	106.392	88.9407		182.045	82.432		65.3244	33.3293		99.8668	24.9903		267.713	143.858		113.68	59.5451
	145.549	44.0449		122.449	158.966		90.0265	32.1582		113.545	92.5535		146.192	29.6908		91.278	36.367
	167.169	84.4146		69.4257	105.372		99.7382	83.5152		125.713	34.67		181.629	142.787		36.493	17.7665
	184.361	150.704		88.5234	155.152		161.792	12.2721		122.093	75.8233		123.41	128.73		58.8198	66.9813
	154.824	13.39		89.6641	113.579		69.6006	32.2976		118.799	19.3861		242.662	64.9336		57.8609	19.4395
	172.061	107.214		184.14	87.4538		140.347	39.273		109.285	72.641		169.632	26.5765		91.3094	33.9914
	135.079	21.6017		75.9064	108.573		10.4229	47.6939		12.5784	99.0051		130.337	137.476		54.2418	61.9483
	141.552	90.2222		88.6539	88.0531		50.5178	13.5018		98.5296	15.5804		115.682	96.4757		73.4548	71.708
	145.333	64.5103		81.2952	164.299		80.4952	18.3221		73.4567	90.5948		104.624	38.83		86.572	46.9135
	69.0643	18.5739		181.206	11.1499		141.845	46.4665		44.2546	68.4332		193.203	40.1317		68.4301	20.1601
	117.721	159.852		100.478	31.2915		85.0306	63.6636		128.741	34.7214		31.8464	45.5758		70.8246	52.9346
	117.746	10.739		181.418	151.957		59.9733	91.0131		154.584	70.2729		180.046	55.2781		78.4457	123.894
	100.94	66.8149		58.2549	139.176		153.871	20.6177		118.58	28.69		106.723	141.387		73.7066	10.298
	154.191	42.7975		120.616	135.719		120.601	18.2571		129.674	59.9354		122.184	170.393		79.7361	54.5974
	107.88	29.2696		73.4518	131.269		109.73	115.555		124.141	39.2721		189.671	71.6675		149.935	55.8626
	133.365	95.9351		62.401	111.573		49.5648	120.921		134.593	34.1629		193.808	42.7944		55.8188	35.5886
	96.561	75.926		71.9216	88.9152		73.1476	21.2091		132.496	31.0453		152.083	18.9938		71.0069	35.3779
	89.5597	22.5331		178.018	73.8599		56.7203	85.9489		74.7042	99.513		188.28	64.6774		81.0061	33.3672
	148.499	125.376		121.608	11.7649		57.9541	80.4164		109.282	94.9886		173.701	33.7726		81.8358	50.9564
	147.24	27.0348		149.843	151.48		50.8084	23.4505		153.049	32.4298		155.099	97.8276		77.1286	89.4658
	181.271	10.3107		116.691	74.0746		72.4872	51.2031		93.4164	72.5778		160.958	89.9709		84.7105	50.0227
	120.533	118.205		161.912	95.1343		90.0836	10.7765		146.071	49.2195		141.515	27.4424		147.694	58.6653
	163.042	130.398		119.434	149.263		77.1979	157.638		97.8169	92.6067		189.037	106.6		107.707	40.8363
	159.38	73.4595		116.811	14.6537		49.1782	66.11		115.714	50.5247		211.817	139.726		77.4897	44.6283
	186.088	97.8364		176.529	75.3183		71.6115	13.2216		124.766	6.08471		116.011	32.9145		164.015	52.1362
	137.643	129.652		135.486	141.266		103.536	142.41		99.7298	89.6316		184.382	109.803		128.046	20.2885
	135.056	24.9977		72.2166	9.16894		49.3459	160.523		159.397	16.6177		229.777	55.2906		51.7676	28.3517
	172.262	72.8719		110.351	22.7493		71.0699	12.388		111.226	61.7467		148.709	122.377		60.1474	48.7633
	129.014	18.8417		159.471	76.9359		66.3111	12.7718		103.749	55.266		126.185	105.986		255.103	9.21471
	168.922	125.905		147.274	139.24		59.1677	157.601		127.379	81.4575		150.004	210.726		72.6466	52.6845
	109.838	32.0755		184.012	131.102		167.313	34.1771		153.3	26.7754		195.709	62.1116		123.836	31.398
	101.21	140.324		197.311	5.0236		112.631	115.784		80.6177	29.3256		116.129	76.3466		74.2463	40.2887
	109.832	39.2149		112.517	7.67308		158.396	9.7772		110.516	94.0372		98.8875	161.796		61.6044	36.5085
	53.0974	32.7738		119.011	15.4485		35.1336	35.5582		105.905	70.4234		165.17	85.1884		67.8157	40.5761
	157.546	118.362		161.617	15.9379		50.8713	129.54		80.0452	23.2511		125.884	25.6025		101.894	70.5831
	58.9971	31.8019		104.591	9.35493		56.376	24.9813		109.371	22.8635		148.021	133.915		120.915	36.1483
	74.0874	18.6271		156.335	189.686		99.8468	101.314		128.138	42.3746		67.6259	65.0987		92.7855	81.9621
	199.136	176.905		166.91	5.845		119.986	152.17		60.6634	22.0261		104.066	23.6867		70.4582	11.7247
	183.242	112.233		169.204	18.9125		120.699	167.992		97.0907	20.6014		85.5182	74.42		74.5695	41.7456
	112.508	18.1875		169.222	9.20412		85.2366	57.5797		96.3833	86.1477		100.364	118.998		67.572	29.1246
	80.2781	129.983		74.9017	19.4101		200.666	10.5		141.738	52.3513		177.799	102.924		65.1751	36.5393
	95.4973	50.1111		42.8705	117.173		131.978	32.1329		107.604	38.6151		131.903	157.391		70.499	25.5787
	177.573	128.653		73.8278	119.87		64.8014	27.4689		138.879	51.8715		193.936	91		62.3164	52.138
	117.506	133.444		170.237	124.55		43.4269	132.769		135.449	20.0186		118.612	57.2259		56.0034	14.5224
	97.8954	130.683		79.6707	65.7708		138.085	16.4591		135.756	90.2384		119.652	54.5707		75.9352	41.9817
	205.989	103.206		150.308	19.3266		148.08	27.5193		122.8	18.1347		25.7976	138.312		128.924	18.7227
	187.715	110.615		132.978	17.2948		3.52479	20.7332		95.2135	97.1796		170.201	209.506		86.8768	55.4769
	106.092	126.487		96.1072	21.0389		158.367	36.7492		114.86	38.1868		113.024	106.909		61.4088	27.5
	120.167	130.429		89.4269	73.2982		121.164	141.72		118.072	25.5779		219.546	19.1185		55.3678	53.7202
	67.8746	36.2181		151.721	155.28		93.7539	145.951		126.427	20.2096		114.413	29.861		62.2391	49.5439
	166.005	64.9558		79.5995	68.1463		147.475	18.1672		142.697	61.0774		164.723	118.245		62.0235	39.9107
	117.387	88.352		155.639	113.202		90.2561	6.48787		104.607	23.3218		148.736	19.9889		31.9703	18.1179
	115.394	26.6596		139.166	17.3233		105.209	169.646		90.7592	23.3371		158.746	107.724		81.3557	47.1535
	92.6695	71.4794		142.467	27.9934		102.091	9.62763		109.582	18.4942		152.056	89.496		152.538	30.5123
	112.699	59.3984		116.783	17.0957		68.0136	177.005		115.988	24.9506		164.965	142.687		72.9196	35.8909
	238.503	120.441		121.828	126.119		120.953	64.9556		112.083	23.3422		175.781	120.299		39.117	39.5783
	214.214	21.173		181.862	46.9574		136.167	127.719		112.181	17.0876		146.234	85.0215		74.7471	60.612
	99.6416	103.227		64.6667	183.664		159.491	86.1191		112.265	82.1811		137.99	33.1176		74.0176	42.8809
	114.183	103.746		179.57	112.31		141.086	11.3357		118.61	53.632		223.694	78.4104		72.6037	33.7493
	133.686	9.91829		108.786	96.5		64.811	18.162		82.8635	45.8642		104.703	80.9231		71.1084	77.4
	142.431	116.953		164.855	40.2157		128.618	128.656		96.8573	50.6848		105.168	122.2		130.092	35.6798
	145.425	8.03226		98.6065	28.5345		103.264	83.5944		100.241	20.2494		162.947	167.197		68.5932	93.3055
	130.765	32.0846		78.6599	79.3649		168.551	170.417		130.093	20.6923		147.065	160.386		47.8311	17.3863
	85.7469	80.9513		139.164	100.615		133.736	100.038		18.0909	27.2522		226.424	103.55		46.8642	11.5675
	120.563	72.9752		128.611	73.8757		63.2575	126.339		124.723	47.4123		181.174	41.4153		56.2779	31.7605
	140.281	28.9565		123.064	124.195		122.301	43.8161		111.271	34.3207		122.476	42.6676		64.6334	38.7934
	99.9767	20.7885		181.939	96.5704		184.876	151.844		102.077	66.2937		174.394	43.3922		70.3304	39.7192
	173.438	57.1077		221.863	25.0919		59.8006	154.47		160.686	33.9021		110.217	38.7143		62.918	12.2028
	200.997	121.674		67.0985	7.64453		84.4899	192.898		188.408	63.287		134.867	58.9578		50.0366	37.5694
	179.586	131.852		160.22	6.62738		162.539	11.8435		154.265	50.8333		129.814	140.986		45.7841	57.2234
	172.81	128.672		81.2439	135.909		50.4037	35.7139		126.629	33.1847		180.985	24.0502		94.5096	42.5858
	158.869	126.576		204.348	120.543		75.4754	40.8282		143.769	20.082		179.907	112.752		158.409	39.032
	156.071	23.6124		71.2511	129.114		138.292	162.88		109.439	39.1933		199.988	175.282		61.8564	55.6467
	173.46	116.095		96.2871	85.7265		124.991	21.4448		141.493	46.0941		136.578	68.4641		47.1717	47.6537
	105.053	35.3932		205.428	190.472		67.7435	10.0435		42.5166	47.323		75.9931	62.2993		69.46	49.8965
	192.439	143.512		98.9744	143.858		65.7941	152.343		51.7393	26.4413		207.041	139.122		62.6098	46.8088
	78.1105	67.0649		112.229	37.7026		36.1418	26.4578		109.908	26.7193		184.604	136.706		49.2976	33.8809
	40.8509	115.637		116.602	145.866		182.634	5.62037		125.087	19.0498		170.727	36.5628		116.271	45.8137
	155.399	131.137		21.238	125.612		152.793	50.5031		112.247	80.6021		96.2602	29.7284		172.516	14.004
	155.116	71.9113		173.354	91.7646		126.692	14.9491		127.329	18.462		167.611	30.9468		64.1037	46.9417
	67.8423	94.6435		79.1508	116.682		110.003	33.4218		105.532	39.3818		177.122	47.65		65.9615	27.6128
	190.635	19.7605		143.194	59.2563		51.5506	21.3908		81.5415	49.7701		177.005	111.482		89.2567	36.8359
	103.807	60.8216		201.937	55.1552		156.884	27.1095		119.761	23.3701		178.748	122.486		58.7153	38.8511
	190.763	77.1399		170.125	107.168		8.1267	30.6368		144.422	48.97		218.472	108.027		78.1182	67.0714
	138.37	28.9859		95.6796	33.0631		117.151	13.067		121.041	49.0882		199.946	131.476		44.1362	33.7562
	210.952	116.056		62.9424	107.792		67.3248	13.1013		112.412	45.0159		178.809	31.6069		62.6226	31.6986
	130.948	90.3675		119.536	86.1605		65.8794	11.9308		105.934	28.3446		98.2353	86.0375		62.6792	69.4615
	61.033	25.6339		86.6607	121.302		53.6879	25.6439		85.1189	16.2618		181.66	67.3444		112.184	38.9574
	152.473	26.9189		118.94	61.9561		132.942	162.14		115.403	14.3602		273.806	161.291		57.726	21.3902
	167.976	127.036		133.058	27.3693		54.753	131.483		111.424	67.4368		149.123	179.903		97.1964	40.9757
	166.335	53.9574		162.161	160.446		149.582	28.1393		123.252	60.8546		155.791	30.6529		89.7911	43.8648
	2.81742	45.645		158.946	6.43617		46.1707	31.674		122.676	68.9949		151.194	182.631		108.973	53.7884
	159.427	19.4843		82.6495	11.0797		169.347	161.758		153.83	58.1689		179.555	100.749		59.5162	35.5465
	160.632	131.697		144.304	151.551		31.336	157.049		116.119	46.556		132.178	66.4864		104.861	39.4237
	61.3425	148.399		85.3941	125.912		81.6132	141.549		107.291	58.0705		146.588	64.2723		148.54	7.58237
	149.761	47.9866		161.549	51.2015		79.5095	150.272		149.801	131.508		157.358	21.5068		138.576	64.5147
	99.9802	34.7338		135.789	102.411		186.953	22.0038		86.7809	24.7791		97.1062	85.4204		132.797	56.9427
	69.3995	29.7346		85.4757	83.2477		57.7686	110.98		121.248	77.4078		30.6506	116.998		76.8731	70.0495
	67.6368	137.645		132.07	45.9367		141.82	111.603		120.276	11.1546		202.322	136.863		74.2304	34.9862
	109.008	15.7284		125.028	119.959		147.79	17.8434		134.189	36.8206		184.183	133.026		53.4137	48.0655
	147.201	106.94		113.42	170.547		66.2031	144.107		122.995	22.6242		52.125	49.0732		59.0356	30.8588
	92.7617	109.722		123.595	14.2572		116.117	43.346		94.1985	58.1517		83.6818	33.1746		96.0148	18.917
	125.855	70.9469		68.8204	83.3902		83.9223	14.6772		62.919	22.1868		170.262	112.414		67.3139	64.1633
	73.6494	101.123		122.943	12.1305		13.8407	89.4608		119.181	76.9444		95.1429	99.1687		87.6498	84.0369
	85.7348	113.292		93.0974	33.2353		60.5568	12.5126		155.5	13.0874		125.767	75.5907		55.6305	43.0511
	157.714	10.5625		100.409	45.2575		175.04	14.6404		128.097	4.6421		197.898	87.1174		46.7289	80.2105
	188.8	37.7086		161.132	14.7092		45.9636	22.1543		118.181	58.2878		170.139	62.5		67.5881	15.8155
	118.929	82.9896		96.5465	176.213		59.3609	132.431		131.689	38.6597		203.738	51.4781		55.2176	44.5609
	129.375	14.4939		136.897	56.8049		150.748	24.5438		124.704	28.3441		126.931	42.6381		168.917	81.8549
	109.06	102.146		58.4517	113.866		48.1395	95.8006		141.735	31.6487		202.284	111.978		74.9395	33.0871
	155.183	33.469		167.912	12.6176		140.18	21.1848		127.654	14.7263		116.158	63.1496		50.7386	23.264
	146.166	21.2932		133.364	90.2333		72.296	11.948		99.7863	6.7799		158.317	94.8458		42.5153	15.8116
	123.598	41.393		180.143	113.843		154.882	100.559		11.7083	54.3367		263.559	60.086		65.617	25.0465
	152.821	13.6217		186.917	129.298		140.345	34.4656		141.497	48.5336		174.526	41.6417		110.715	20.1818
	88.9303	127.21		100.603	142.774		46.0265	35.445		110.566	21.2951		95.3716	65.9282		59.5934	46.7811
	123.762	75.1146		201.604	101.28		114.412	19.9971		63.2095	33.8151		141.031	77.7296		79.6319	6.72887
	160.453	29.4563		170.439	136.34		86.0552	52.952		81.7103	79.6986		164.704	79.3569		86.4362	48.8412
	188.367	142.476		108.78	139.551		153.426	18.2724		134.316	46.1524		116.685	16.6667		94.3102	80.9423
	146.879	141.458		190.243	117.22		118.594	13.5591		101.353	20.2548		112.244	113.265		69.779	20.194
	71.3507	15.9593		163.18	38.8149		58.4849	122.156		130.565	17.5322		230.877	77.4383		49.8466	30.5654
	195.369	70.5309		117.77	59.1061		75.9441	176.048		128.784	20.6279		164.626	116.633		41.3618	36.2
	100.826	90.4651		138.856	167.601		61.6731	156.177		152.651	21.9424		120	59.5825		64.2681	45.2746
	159.197	70.7401		179.881	119		181.556	125.837		117.281	18.3326		181.815	150.01		93.875	205.798
	113.763	139.386		124.422	147.562		67.6507	54.5833		146.983	52.5909		242.381	268.537		83.226	11.6411
	181.784	22.8634		157.401	110.947		4.26587	36.7692		114.525	39.1116		88.9448	49.417		39.8189	22.9575
	99.4375	20.7671		119.088	170.479		59.5415	12.4062		131.618	53.7297		200.703	58.0918		114.956	60.2137
	155.647	24.9125		119.217	151.262		72.8404	9.46961		107.939	45.8913		157.248	44.9017		76.2256	31.1119
	163.026	109.036		138.439	120.142		21.5912	11.8222		124.549	26.8687		112.279	59.1706		119.647	14.1129
	159.713	41.3688		102.652	41.7386		30.3543	8.2369		118.228	44.351		143.026	240.727		49.8125	36.6
	112.878	114.614		124.196	21.5538		87.9833	8.96392		86.8162	47.7737		168.656	105.692		123.495	11.5123
	129.214	37.0373		143.886	165.921		86.0608	77.9077		47.8317	43.5913		189.585	51.7433		37.8699	19.1233
	161.542	148.397		150.558	12.3399		65.2912	14.2431		128.129	25.8084		173.226	58.0153		41.877	36.326
	181.158	23.17		113.088	14.6904		65.5012	105.558		103.824	26.8218		153.993	81.586		77.7172	11.1696
	177.556	23.9133		187.403	131.145		102.416	16.9821		100.763	60.5864		141.59	112.882		94.6853	16.8958
	131.425	14.5552		200.304	90.2705		71.4051	144.287		51.5498	31.2162		153.383	145.929		185.763	23.283
	119.04	44.9405		134.946	100.257		150.616	139.606		144.506	13.1492		79.6524	59.8716		62.1821	34.4378
	124.448	22.4143		121.483	124.664		55.0881	43.4462		143.601	45.941		187.233	32.153		45.2634	13.0536
	95.183	62.5942		144.521	141.953		71.1172	32.1473		123.361	134.145		147.524	184.446		86.2462	51.1452
	225.561	89.6418		79.8889	152.552		42.4006	164.244		133.368	31.5148		127.55	51.6541		94.2388	43.2467
	148.401	11.6811		163.015	118.262		74.6881	24.8815		113.493	40.2013		173.1	46.0628		71.9594	61.4831
	176.091	129.27		108.673	24.8272		32.4972	21.7307		92.3825	46.8492		203.572	187.806		69.5013	57.9035
	150.698	127.55		187.14	111.903		200.429	32.9719		91.7708	15.0119		61.4522	29.6676		75.3567	84.9062
	185.593	100.504		171.574	119.404		43.5189	34.8357		138.947	65.697		188.132	57.58		56.9883	42.7763
	241.383	58.5056		147.462	75.2849		62.08	20.1484		47.5294	23.1516		76.9926	26.5101		49.9536	23.351
	178.183	18.5653		58.9317	115.051		67.7077	83.0792		68.5466	106.111		163.373	110.137		58.2431	42.3438
	99.2835	140.832		178.193	149.932		63.4105	19.8702		53.3581	19.206		162.899	59.9782		101.766	44.0093
	269.043	155.428		159.503	129.282		42.0933	63.2816		41.9742	13.4013		50.7027	178.756		85.5648	38.8237
	127.838	151.684		168.777	61.5591		50.5783	81.6585		47.6818	89.2014		81.2078	138.977		78.776	28.6972
	162.841	146.737		109.211	144.014		55.1734	44.9599		136.545	79.7467		165.686	172.169		66.7795	47.5285
	164.981	19.0291		176.655	19.9899		38.2814	54.7		93.7896	28.7726		92.0758	79.362		110.537	45.8196
	123.963	41.7281		187.58	129.079		111.205	12.2188		170.196	23.7985		225.101	163.181		95.247	42.5163
	145.389	40.6814		165.384	111.583		71.6658	36.3471		101.253	7.08898		189.407	147.721		107.496	59.2602
	70.7493	53.891		121.399	142.775		45.7317	8.52113		122.198	58.774		157.156	33.2112		62.3571	62.2756
	119.65	79.4399		140.339	31.1051		55.3758	36.9043		192.99	70.268		140.67	122.281		69.8135	59.2353
	203.531	83.7547		150.479	120.491		55.6512	28.7609		60.9	91.481		148.803	19.9121		145.165	64.7273
	205.625	31.3416		161.481	127.057		31.3476	29.255		174.257	39.2688		93.5605	32.4475		123.699	39.8731
	217.679	76.1534		167.008	148.03		54.6204	155.989		114.693	42.5424		196.918	31.1916		112.053	26.2984
	145.974	147.007		140.414	102.604		151.122	58.5432		137.976	58.9504		200.499	47.6436		104.455	12.7681
	167.143	43.7684		176.447	123.344		166.501	114.065		106.633	86.2977		38.5323	149.609		64.6494	87.2381
	141.212	80.9788		175.666	144.413		54.8221	98.4416		161.823	17.8227		136.619	36.7276		71.0523	16.278
	75.1869	122.347		167.953	116.482		53.3914	111.187		128.417	31.9278		154.274	23.9405		87.4731	56.8701
	116.704	66.5013		158.368	116.769		67.7152	12.5773		185.484	16.1989		128.904	193.393		49.1618	40.1059
	158.406	90.7426		188.911	127.943		77.9172	72.8345		106.966	48.4336		154.425	86.9706		55.2405	52.1076
	190.672	120.483		84.9139	144.495		43.1333	15.5718		103.519	4.16525		145.235	99.6511		118.115	97.8151
	184.508	24.9356		146.175	92.3143		60.9705	19.6957		171.51	42.6718		160.481	30.5368		83.088	53.0573
	143.675	16.351		169.607	74.5712		56.1299	128.439		133.992	38.1333		169.345	92.8197		113.449	17.4099
	196.441	119.9		46.9357	157.273		163.798	25.8995		117.426	57.6934		124.624	110.552		67.3132	43.2516
	92.0047	54.1741		164.534	34.3795		20.0282	15.6298		120.19	32.2535		110.09	67.8175		78.0759	58.1448
	176.638	134.636		62.7701	136.16		82.8794	20.9449		69.3674	30.3743		162.569	45.1375		170.797	75.9802
	172.516	116.588		120.478	33.9507		29.3936	8.81771		174.187	40.4654		216.026	35.2589		70.8902	77.9249
	27.4077	17.2358		162.62	154.779		59.9853	20.8245		101.182	54.5019		103.404	120.453		59.0275	76.0076
	195.131	67.2839		97.3492	103.066		71.25	13.5045		137.437	24.9088		168.849	38.7608		35.3715	35.7896
	102.729	61.1841		200.308	29.6004		72.4037	57.2341		104.276	4.97417		161.195	32.9273		76.1488	15.0424
	161.376	43.4124		101.625	50.0166		81.8394	14.2633		147.007	14.0233		120.982	74.1141		94.7919	67.1182
	49.3551	65.885		177.575	66.689		28.2786	140.5		103.739	26.1365		157.081	45.2055		68.2929	88.3201
	182.678	52.5245		112.645	9.78291		123.212	60.5379		126.282	68.1362		96.442	27.458		66.9733	36.1407
	101.482	46.0577		110.657	125.388		69.8454	11.5656		115.397	54.439		211.31	93.3539		43.9874	80.9119
	139.452	23.3967		193.055	133.097		54.356	13.531		117.483	8.23011		158.862	54.5388		65.4	16.9701
	133.986	15.5759		122.417	17.6972		76.8837	12.1341		113.395	9.49938		173.611	93.5885		81.8803	42.0786
	133.095	96.9925		104.159	9.44012		53.63	157.597		129.251	43.3158		111.392	21.8396		99.4727	14.2229
	124.236	28.8104		210.273	15.0546		82.9074	6.56848		40.276	10.5276		174.029	56.9429		184.686	6.07273
	134.99	106.713		161.522	102.188		64.4959	12.5058		64.18	34.2859		144.159	125.444		93.1306	90.8889
	101.725	30.451		103.923	183.496		77.9309	117.595		128.058	8.25794		147	6.58261		89.1342	30.0471
	128.094	62.2464		107.626	104.12		36.7261	28.1351		147.509	10.5182		84.919	30.4668		68.5204	60.1072
	89.8468	150.316		173.775	161.137		60.677	37.0466		140.638	11.7691		183.281	169.822		74.0036	23.8327
	194.886	63.8892		127.405	134.452		65.4	19.3069		153.799	56.3705		171.801	20.5892		61.0364	51.9157
	160.89	119.535		146.897	142.552		163.86	38.7685		147.803	37.5345		140.534	34.8734		63.5721	46.3177
	167.943	67.3341		211.358	133.935		45.5492	17.8517		139.149	22.9682		175.384	136.977		23.645	44.6838
	147.028	83.3977		229.009	51.0054		58.2626	85.9033		65.4083	86.996		156.377	128.738		176.466	27.101
	211.869	36.6551		84.6578	12.2844		34.7165	36.6013		93.7048	33.5573		120.614	164.346		52.7077	15.1045
	83.0554	26.8768		60.4116	91.6183		58.3142	57.4851		99.9494	81.613		114.097	250.713		99.0556	45.9111
	149.102	147.135		156.873	11.5024		59.3879	14.8118		130.164	5.37821		117.653	127.971		53.6471	58.5076
	82.3126	11.6225		76.3211	144.262		51.0292	7.92962		114.991	38.7625		191.945	18.6881		71.9281	44.2494
	117.587	69.5638		62.557	93.6174		115.74	76.3094		110.262	32.1464		157.273	57.6495		57.0883	10.39
	150.206	137.446		206.5	13.3883		34.1762	15.5413		167.118	24.1618		190.866	36.08		88.9804	58.4281
	106.893	108.406		172.402	14.5367		120.918	28.3958		116.371	40.3629		149.912	29.6432		102.706	40.3288
	117.01	8.09665		124.07	90.2096		147.233	61.0568		117.604	38.6638		166.111	74.3471		46.2261	83.4561
	191.3	42.1681		107.331	141.835		110.322	79.377		146.713	8.89116		85.8049	27.4853		56.9253	44.69
	96.7217	173.641		33.8648	83.1663		48.4448	145.033		101.191	14.5542		142.148	99.0365		154.154	50.2419
	110.258	34.3846		124.782	43.9339		75.1529	6.19776		105.612	10.5397		160.579	44.9883		64.3872	12.2477
	170.245	85.386		182.593	102.722		37.3979	10.0396		112.209	79.0886		78.5061	69.7564		87.201	13.6435
	131.158	36.2096		60.4068	18.2759		123.542	19.899		115.366	34.7335		93.9462	18.7262		87.1277	66.7476
	107.794	149.499		174.784	123.167		10.5842	40.4296		46.4744	17.4722		114.2	44.5137		55.2044	47.4143
	211.149	17.5766		50.6477	89.1491		51.4677	37.9279		88.0081	21.0881		139.722	9.52609		76.2432	44.6926
	213.036	109.744		189.236	92.2472		8.01732	50.0939		102.812	29.3547		183.444	48.2166		82.1541	26.8055
	125.455	129.376		36.3656	9.78904		133.687	73.7152		92.1	13.1504		189.109	22.1899		82.897	40.0828
	168.803	88.5522		139.948	118.022		58.531	9.68182		88.737	28.4127		189.476	22.1604		59.8487	19.4087
	178.337	22.965		114.489	178.578		68.5468	10.463		109.755	11.4571		177.113	115.847		54.4212	21.8916
	180.667	116.133		105.085	122.298		48.0762	13.5173		113.613	18.9489		176.238	123.018		69.0742	52.1561
	65.6253	6.73941		148.339	22.2635		72.3129	110.504		113.132	81.7515		226.715	51.9977		197.721	41.3562
	99.4769	99.8798		66.9762	17.6624		37.7729	18.7419		134.51	16.4995		173.658	97.1262		70.2772	43.4498
	101.441	124.034		161.6	25.4037		120.68	9.94624		124.07	85.2785		119.208	21.9153		61.6468	88.9555
	73.7125	83.4397		116	132.615		48.5389	123.928		103.479	96.1271		48.3629	26.0086		178.968	42.9384
	152.555	71.2004		96.769	122.892		184.174	6.47906		107.204	12.5369		183.059	89.2045		45.9058	28.006
	114.621	93.1164		111.35	147.666		166.841	12.9531		142.429	14.3023		212.525	143.975		79.3727	27.2471
	160.008	93.1292		113.688	121.299		65.9881	132.462		112.466	4.31		192.048	59.1168		36.7711	43.6314
	122.379	83.2083		101.924	59.5179		160.361	82.5802		92.1986	18.9262		171.081	112.088		67.5751	15.5261
	88.5803	29.9013		164.573	56.6401		90.7939	8.47202		40.6798	40.6255		280.678	19.2776		59.9579	47.6061
	88.601	41.9177		129.077	116.52		150.509	24.9058		113.325	17.81		154.594	23.6964		51.9103	13.9964
	136.993	139.15		146.887	83.6561		69.1375	33.8515		110.407	18.2247		216.797	26.6436		62.7138	26.3627
	158.223	15.7167		163.151	14.9194		54.1444	18.0575		152.491	53.5296		185	19.5953		226.707	33.5551
	178.312	93.2813		24.7905	78.1752		59.438	48.9918		111.228	15.7955		198.811	121.566		80.1096	25.66
	133.887	150.423		129.115	170.89		46.321	65.5876		114.064	102.609		84.1326	41.3154		49.734	27.8314
	56.8482	90.2752		165.486	84.4475		70.1933	65.1163		131.446	17.6352		169.316	64.1182		75.7634	47.3571
	126.162	7.10891		179.587	168.152		18.746	10.1156		86.2686	20.5075		217.185	98.4872		53.8	35.8893
	125.148	26.6713		91.0529	181.016		54.0764	99.7059		137.863	26.9714		146.815	110.35		57.1063	43.0916
	87.2164	78.4057		161.868	50.5172		150.057	61.8654		103.681	19.1351		167.383	18.2379		108.114	24.7876
	100.55	120.919		165.386	96.8488		107.482	7.91772		121.543	16.7319		141.518	27.3778		58.7016	37.273
	136.342	111.488		128.27	50.5672		66.9345	101.702		124.241	17.3982		140.626	20.9142		64.5279	28.0507
	87.9277	76.9034		78.3761	52.0575		44.7917	10.1124		128.24	21.3617		97.9959	84.1132		69.5096	8.52032
	140.273	85.8597		136.683	145.118		90.4516	141.7		137.851	73.7018		172.304	28.3618		61.0099	47.0248
	122.038	86.0358		145.462	29.3089		148.337	16.3435		117.2	60.814		172.631	43.4231		60.6364	52.0553
	165.678	56.3477		101.567	24.6066		177.935	17.0634		116.516	32.6653		169.591	26.0275		64.0828	6.12326
	79.8981	60.8518		221.338	42.9332		82.3006	19.7071		104.603	29.5265		160.621	88.8631		58.4641	27.4644
	217.33	110.057		68.2058	109.853		60.3437	17.9883		145.503	50.6654		125.262	29.2381		85.9378	57.8876
	139.714	48.4448		123.412	189.774		49.7305	12.736		93.0354	30.3853		163.289	29.7448		83.4568	73.4345
	136.519	63.3141		155.692	92.2444		151.614	23.7782		64.3422	44.5203		32.5599	160.173		113.098	10.9321
	147.609	48.7631		64.8323	107.084		39.7679	102.848		107.526	22.8209		152.517	46.0651		104.282	42.7138
	110.586	121.871		97.3468	143.429		43.7139	148.98		101.947	23.4082		144.615	77.3603		74.5575	39.9115
	140.635	90.0556		102.683	124.841		131.636	18.1541		94.0374	25.2886		123.789	33.8459		177.694	75.4231
	133.371	135.485		254.902	157.859		56.9185	97.8679		100.039	4.2217		54.5565	91.9091		57.2305	40.4986
	153.639	50.2948		162.765	37.0953		125.243	58.1961		158.404	4.7563		149.101	246.491		126.016	33.8359
	150.765	114.245		185.202	113.602		110.016	153.633		122.657	42.0534		119.207	45.9457		46.4866	27.3448
	210.66	24.4529		100.388	22.0646		42.8697	13.3073		53.5979	90.3145		146.09	75.8333		64.8916	37.756
	141.625	28.1383		139.076	98.6368		66.5254	78.731		91.3193	29.5088		209.591	104.685		31.0527	44.8707
	73.7128	130.814		87.3854	17.0625		28.5902	32.9129		137.83	33.318		78.6629	24.6263		116.541	43.8801
	112.518	10.86		146.02	60.6786		15.9591	50.2732		116.248	23.0796		155.614	92.8213		52.9262	13.8148
	139.755	103.36		206.96	148.878		131.145	14.337		126.278	27.1777		200.288	33.3636		65.3333	40.2741
	29.7311	151.798		164.103	5.37687		136.841	7.54202		123.501	22.3746		235.684	29.1369		82.6523	43.6823
	187.333	138.695		146.818	117.991		8.50613	133.198		109.918	21.2061		204.073	17.3973		66.1765	41.8204
	14.4103	105.422		124.796	109.57		63.26	14.6685		126.306	29.464		153.97	43.7973		6.65401	38.5186
	193.572	50.5018		170.917	97.4286		62.5	14.4587		81.7907	78.6468		138.058	124.023		71.9915	52.4241
	109.651	117.422		145.586	66.75		54.3421	105.158		111.474	22.0917		98.391	30.5857		70.9596	68.1302
	168.188	14.0643		224.676	83.7952		78.2265	59.2372		127.32	15.1241		137.553	35.0766		101.085	33.7147
	166.124	98.5182		168.702	14.4003		114.456	13.8947		128.855	158.115		153.289	44.7225		145.733	76.0639
	10.6485	31.8032		143.871	127.767		67.8944	13.5506		100.229	17.2303		169.972	13.8447		143.778	25.4825
	150.407	131.787		173.179	7.20379		166.439	25.5439		108.42	41.9788		138.792	35.1872		113.93	48.3661
	67.6423	129.329		117.675	17.8893		34.2785	44.6193		143.343	77.5262		165.743	121.954		166.736	24.0506
	118.356	83.5947		62.4485	17.4403		72.8889	96.5275		100.751	9.72803		78.5848	146.434		79.2135	33.875
	124.827	70.5853		154.3	67.0533		103.154	64.5273		163.549	16.1975		99.8812	69.8582		85.7273	43.5046
	118.879	90.1121		145.367	135.211		63.9791	36.0506		121.121	21.2448		190.269	29.3692		63.9692	21.1476
	134.159	99.4403		149.226	125.344		75.5259	126.344		131.114	19.9237		107.506	106.137		55.8567	28.0639
	143.192	64.31		162.328	125.394		62.4837	97.5566		104.416	59.9702		107.553	86.6692		19.6448	11.8171
	125.591	119.531		177.153	177.777		47.1732	16.9561		137.918	41.3333		130.267	147.054		153.701	20.583
	84.3175	86.162		121.04	21.6756		69.6675	19.2604		130.549	26.7279		223.573	46.5279		66.0362	116.901
	31.2971	65.3233		181.119	153.124		69.2924	105.211		133.065	74.3941		99.2864	36.5742		45.0175	45.0784
	27.0888	15.2945		99.2375	33.4331		148.839	48.3305		140.426	39.2156		168.987	93.3544		52.1788	49.9271
	133.538	99.7786		201.78	148.641		130.772	15.7477		120.897	99.1559		171.119	46.5501		60.8862	111.262
	134.976	155.971		171.163	66.4915		160.028	16.3362		130.483	25.3398		62.5423	47.2		83.0485	56.9615
	87.1568	16.6829		122.602	15.1233		121.756	64.8849		115.427	17.0292		70.2691	31.3227		52.4498	38.1183
	99.125	136.318		144.062	168.459		32.5427	85.4789		141.945	38.6836		97.3738	94.4017		33.6091	55.4589
	133.633	21.4613		143.896	148.568		55.7588	35.0475		150.175	14.6652		123.67	49.8602		52.343	76.2263
	121.217	58.7225		9.1789	12.5571		32.5891	13.6269		146.381	75.1549		154.548	110.107		65.4436	70.2753
	131.537	16.5283		143.174	66.2944		36.3508	21.7891		117.423	21.6813		85.7599	25.2665		198.956	35.519
	107.799	53.217		152.892	129.885		55.1761	72.9436		143.722	16.7153		37.8132	106.823		91.4458	36.9233
	114.634	121.26		126.891	18.0022		164.811	13.0593		92.6876	19.2023		185.432	105.538		62.6967	55.023
	125.208	152.049		202.686	22.0827		82.1959	68.3387		93.8657	3.17157		112.268	29.7883		100.441	22.6759
	44.5075	27.2005		158.95	19.6538		48.9744	175.563		112.53	72.9079		125.722	106.48		84.6965	33.541
	39.8913	99.5478		153.568	162.34		44.6934	86.206		101.916	40.8254		157.425	134.039		123.451	58.8669
	123.109	108.937		153.397	143.938		59.1281	125.228		121.33	3.5049		150.451	52.446		54.5677	60.6274
	151.654	13.9711		226.973	71.5533		76.6966	9.41463		93.4192	37.276		161.896	109.786		99.0752	40.6278
	70.0486	110.106		130.064	152.648		74.5194	47.798		117.446	19.9188		156.587	32.7354		116.847	60.2674
	100.68	86.1636		142.585	91.0895		73.6675	99.1053		186.184	33.4893		163.401	14.5849		180.581	38.8866
	102.65	92.7703		176.705	17.4853		30.3879	95.0851		142.643	43.6908		197.082	63.8978		76.4812	56.8974
	221.962	88.0385		178.349	126.374		82.4209	25.1735		81.2931	51.4379		114.544	169.057		74.4923	38.7991
	88.2743	107.757		180.709	99.5311		57.9952	11.7475		129.042	25.444		75.8643	51.8998		63.9516	55.9489
	105.4	129.582		125.017	136.508		49.9799	13.315		138.464	35.499		118.839	23.5861		81.5	37.9644
	98.5487	111.17		85.2297	15.0822		58.7624	138.327		130.706	54.0605		115.326	73.7212		92.9493	39.7079
	78.1125	85.307		3.28571	20.0437		6.45382	88.0633		157.097	37.0144		139.311	33.6139		99.3728	43.9774
	40.2474	82.0672		71.6953	131.221		39.8717	18.2023		117.783	38.5224		127.052	67.4735		107.776	28.0379
	111.269	106.655		142.59	78.216		55.0256	17.9498		108.506	37.125		134.307	30.8058		103.393	41.7233
	148.074	33.8747		184.778	177.687		30.7655	94.8011		118.991	11.5491		166.825	114.018		46.5147	28.7167
	173.035	54.9944		63.8107	85.5649		64.1955	13.8813		104.21	35.4236		111.868	144.112		96.248	23.6376
	103.333	110.225		120.078	12.162		64.5673	31.1635		147.613	29.2439		119.181	48.9854		49.3661	43.0624
	124.222	59.9522		154.769	149.327		162.135	73.9582		103.882	10.0815		90.6255	139.407		64.2617	66.8427
	127.454	140.172		149.644	178.812		62.4395	9.72383		136.505	7.00273		36.6404	29.3902		161.885	40.6985
	136.306	60.0219		189.243	190.541		166.088	16.4372		98.2556	60.6411		128.835	87.1641		86.5032	34.4765
	173.186	97.9907		159.026	103.701		139.672	12.8381		118.639	35.0248		136.134	93.0642		126.764	56.5286
	98.6548	108.964		107.146	136.411		45.3257	46.8862		106.395	80.5918		97.684	34.0776		122.485	38.6043
	158.799	128.396		106.299	151.128		53.9777	81.6168		120.265	10.5165		66.4132	33.0285		56.7993	71.5852
	146.599	26.2696		167.96	114.348		53.571	14.5961		96.9145	63.6958		146.947	71.25		83.3995	22.685
	130.343	25.0097		149.962	168.876		32.92	14.7711		155.637	83.2147		129.743	97.0489		111.767	52.8789
	139.727	38.6408		90.8392	121.099		61.8446	6.90766		136.227	29.003		180.043	81.0897		74.7391	58.0785
	125.015	14.2776		86.7888	14.9194		114.388	145.584		146.088	39.3347		160.428	118.681		106.168	43.095
	145.2	103.059		139.679	185.772		40.3285	9.63835		133.142	23.1591		148.106	45.3762		91.2132	39.6227
	167.645	64.5542		137.089	17.2642		120.745	20.4432		118.257	18.3569		90.278	40.4244		87.1657	46.9152
	127.119	76.5833		138.977	117.841		116.976	21.5441		120.871	11.245		128.396	68.985		112.996	43.8566
	125.321	155.97		137.129	12.892		49.9781	27.5665		90.0858	24.0579		162.021	186.134		57.9524	22.9976
	195.448	39.2068		189.61	182.68		93.9127	9.94236		148.114	33.2465		101.915	118.029		113.082	44.8299
	146.796	50.9088		140.14	90.0863		40.6806	49.1599		144.831	58.3875		120.83	21.2926		62.7753	14.3768
	153.453	68.72		100.291	20.2255		123.617	26.2706		136.304	19.7899		125.115	170.138		102.535	34.1292
	196.171	31.9834		162.574	24.1797		60.9116	39.6424		129.496	36.7518		78.5246	35.0747		56.6236	42.0588
	134.834	168.865		141.953	139.591		81.5474	25.0553		117.082	21.5881		149.362	119.642		61.5677	45.6576
	140.694	42.8479		169.624	31.6526		147.387	19.1739		92.9645	40.1261		80.8117	37.9547		48.411	70.8532
	126.457	78.1016		158.569	74.5346		90.0029	117.03		82.4395	21.0971		108.91	110.788		53.0205	53.1174
	187.637	14.5191		148.175	164.419		78.0751	10.7103		120.754	43.1156		77.1496	66.9142		49.5702	56.3422
	137.244	10.4551		156.205	7.5438		85.5696	139.903		106.811	61.2854		103.067	181.3		69.4642	112.386
	151.003	59.7907		132.809	124.166		76.7331	9.98312		105.584	19.616		173.858	112.589		119.126	42.1401
	95.3763	32.7174		153.761	125.787		55.6839	33.7418		121.635	58.9917		167.406	58.4124		50.8994	50.5
	187.087	9.97491		175.832	158.02		65.1498	114.039		117.855	16.1284		111.364	25.4085		32.3633	31.981
	76.6006	91.9273		97.2246	62.6971		69.1395	15.5016		112.135	54.3246		231.231	120.253		60.4949	45.027
	16.2195	100.265		97.6163	141.888		36.4346	13.3603		134.173	23.8241		149.241	63.7385		58.5206	37.0797
	82.8397	113.576		107.868	116.016		80.9054	12.9537		111.207	38.6012		144.385	113.409		51.9586	47.7663
	141.285	124.585		136.558	54.879		58.9943	10.2229		149.444	30.338		304.754	89.0345		38.5848	25.186
	159.69	142.448		75.062	120.048		45.8841	54.2252		94.9377	85.933		176.443	36.5349		57.8692	40.8502
	209.798	112.791		30.7046	137.952		70.7582	14.5382		131.326	28.04		218.755	114.321		63.631	43.6564
	82.7494	16.2163		146.193	146.079		50.7253	9.33021		116.615	20.0758		159.793	57.2671		28.3377	34.7318
	138.038	14.5477		130.325	125.205		57.4226	6.97528		66.5509	24.831		204.505	112.273		57.75	26.9975
	154.285	93.538		175.369	159.492		35.3275	49.6186		109.489	20.893		68.5255	54.2014		62.1915	47.2725
	131.252	54.1483		81.3922	22.3426		86.7533	62.7251		172.101	5.71517		151.75	47.2628		88.2254	39.5658
	133.24	66.4556		158.347	121.134		69.9412	72.7057		125.746	38.8381		108.733	53.6569		97.4684	31.8894
	121.088	45.023		108.542	144.544		121.79	17.9918		109.26	22.193		156.183	96.6917		37.4381	38.7037
	92.8452	85.4012		159.627	178.629		64.3528	42.3081		94.1816	12.8083		106.193	39.2879		75.7466	59.4706
	137.869	57.8143		101.502	33.9029		60.6889	22.7143		147.996	21.706		109.537	28.954		44.2424	17.5744
	162.613	44.9561		102.947	85.5349		57.2867	5.48617		103.216	40.6998		180.826	28.3604		67.8119	28.6469
	126.133	90.1041		112.667	98.8142		69.972	29.8529		91.8677	19.5423		128.854	56.9381		12.9437	81.5039
	79.7066	20.6247		129.704	96.7241		83.4303	62.1508		111.724	16.557		248.829	32.6168		48.3962	37.7614
	136.525	92.1426		202.945	30.2353		51.8135	24.7639		114.733	27.6793		76.1311	52.5915		103.877	27.2485
	161.613	112.935		110.242	114.718		66.3742	50.1327		181.255	21.0549		193.697	116.038		109.986	35.346
	59.9344	95.0864		173.562	43.0214		113.648	12.4664		118.988	20.9196		186.291	22.5481		45.7569	71.5726
	163.147	48.9227		184.256	154.501		66.07	10.8753		115.679	22.8214		105.485	106.725		64.0432	21.3547
	113.584	13.3855		192.81	120.56		53.3169	47.7632		140.933	21.6849		227.325	30.0418		64.9444	53.4103
	170.454	13.0706		12.9395	59.1158		26.0217	16.8931		94.5734	24.0725		193.678	19.6355		103.685	137.392
	141.992	103.561		155.815	70.7472		42.4922	117.659		58.8986	45.6754		110.342	88.9815		132.253	15.2784
	89.3882	108.644		146.232	49.8726		6.81863	37.5267		115.345	27.6013		146.693	40.9618		59.3295	23.6186
	99.6923	111.702		133.873	34.4789		64.0831	33.8845		143.421	20.4319		71.2744	15.9058		57.6189	49.8636
	72.5802	23.7906		19.7397	75.6638		72.5989	8.69367		109.328	14.7904		188.982	90.6124		109.681	31.3096
	130.748	119.807		66.6658	19.3364		70.5703	10.1176		142.589	4.42257		277.033	50.0493		21.7029	43.8196
	177.591	26.4702		131.124	170.393		48.9137	32.8123		124.672	41.8575		140.326	129.436		63.6983	19.5486
	129.401	133.912		127.865	19.5841		67.8025	36.1758		132.379	99.5221		143.343	32.0255		84.1767	82.2709
	155.933	19.2721		179.215	50.2933		78.5878	12.1533		141.95	26.6382		108.186	11.9215		52.018	36.8484
	212.242	59.4779		136.589	81.9642		79.1176	13.0767		101.313	58.8004		175.335	34.7249		160.717	39.8092
	204.595	153.151		206.024	160.011		63.0068	24.7338		122.198	21.4034		210.522	77.6638		57.4019	30.0297
	139.893	20.1289		116.046	139.038		50.9447	95.4041		127.331	23.3682		99.1573	112.52		51.6093	39.6316
	186.342	119.802		122.655	99.1048		47.8071	19.9815		129.61	46.3437		147.801	28.2674		43.4763	36.6276
	132.938	171.227		170.853	4.36559		111.675	43.1323		99.2123	69.6719		158.498	160.99		65.5296	56.4809
	123.709	19.8106		128.515	37.6932		57.3181	28.7367		155.975	5.10646		159.119	17.2951		21.7854	18.6899
	117.739	125.788		145.772	61.6189		45.8983	44.6442		103.976	26.7494		140.943	64.5154		173.789	26.5283
	103.683	101.9		25.408	60.9348		64.2542	16.0226		151.071	17.341		183.086	53.8118		72.3512	50.3909
	105.851	131.548		138.761	83.7839		60.3979	61.4902		147.776	51.5118		111.917	49.2541		65.4248	44.2333
	2.66458	83.5788		125.499	135.993		68.1344	11.5562		88.557	53.6351		135.122	68.4155		83.75	30.4689
	61.2981	12.205		53.6839	33.1226		47.8951	112.075		173.234	23.5963		101.586	45.7363		96.5572	43.8918
	181.386	73.8278		86.2884	66.3247		68.6333	17.4154		88.2968	68.394		128.302	54.1099		68.9967	11.8785
	81.0144	65.2284		114.032	20.8858		52.1149	62.493		127.58	19.7244		146.407	34.7986		109.743	34.4647
	69.6923	127.482		151.319	136.042		63.398	55.4476		133.272	42.2362		137.985	27.3348		79.2474	30.5288
	84.8467	125.216		134.951	116.991		55.1089	44.1801		111.224	49.2876		96.5321	94.4907		188.708	53.2918
	182.558	36.2038		152.595	22.2747		56.8077	118.678		103.686	29.1807		161.946	26.5358		154.159	54.59
	149.992	128.19		121.884	129.586		43.9135	89.7918		83.5967	32.8506		247.859	29.4928		63.9221	57.5199
	200.569	111.875		148.665	159.559		73.1007	29.4771		135.252	53.1329		217.397	126.252		80.2481	29.0938
	197.044	18.7767		166.265	84.1325		90.9837	8.9102		147.634	42.2366		55.5904	82.2963		10.0098	33.2683
	219.275	25.4757		90.8355	159.159		41.5376	45.8607		145.352	21.752		153.291	29.358		62.544	73.0803
	121.046	28.5958		134.173	13.0379		72.2955	10.9576		124.608	64.6233		137.548	44.8175		10.2978	20.9233
	203.683	18.4665		35.3738	157.304		54.0094	71.9527		69.8089	89.1244		236.492	113.43		137.38	19.9216
	154.946	35.3443		180.738	13.571		49.4906	39.8636		117.102	29.8861		189.763	83.2915		68.7204	41.8261
	192.75	163.121		20.3971	159.15		124.694	50.2073		122.592	32.1599		43.983	49.112		83.48	48.5836
	158.959	111.166		87.1627	13.5812		54.0847	13.3672		115.371	18.0812		268.3	85.6226		78.5045	30.4546
	73.7428	63.2225		164.805	173.278		59.251	127.76		111.768	86.8277		135.245	36.8977		135.962	22.2194
	186.771	34.3127		172.629	127.834		43.0915	133.78		153.755	30.2039		32.66	54.0933		102.906	89.576
	95.9167	31.8601		116.058	147.27		47.215	11.8032		143.631	38.3308		101.61	74.6635		81.5891	36.9442
	151.912	17.9606		126.807	19.8293		53.0952	15.8613		120.948	28.9258		148.057	203.477		63.6014	54.5184
	19.3928	148.266		136.502	176.129		80.2705	53.2236		129.199	37.0384		140.604	31.1711		97.3618	54.8613
	7.61246	141.318		163.55	135.102		36.934	20.4956		115.466	82.1374		140.334	24.629		263.356	50.0075
	165.656	181.301		191.399	36.5158		65.3003	18		56.7684	40.029		194.289	14.8326		67.7661	48.7789
	145.182	120.329		67.6754	150.593		93.401	66.8074		115.97	42.59		80.277	50.8162		110.618	36.6007
	185.472	108.059		160.401	140.532		58.2039	12.6697		108.86	103.052		96.2612	30.9134		63.2881	37.7319
	146.02	27.5106		86.5448	32.7019		25.6152	34.0055		137.279	22.3648		196.335	130.519		134.754	42.524
	2.88628	106.282		190.787	153.366		48.0032	42.6034		121.214	42.6132		173.751	27.7944		78.3769	44.7552
	25.3784	189.01		162.414	35.1507		82.5986	19.0554		120.175	27.0905		206.395	92.5113		162.387	57.9931
	3.96905	49.4545		118.8	115.033		54.4045	27.5788		132.697	54.3474		163.084	30.6748		89.0631	45.8932
	3.06725	9.87579		142.756	87.2297		45.449	16.7475		138.412	94.5166		52.4779	107.359		117.209	37.0888
	3.05894	172.709		114.254	46.5714		79.6745	94.5263		57.0047	66.4705		167.085	140.066		57.7674	37.7714
	2.87569	187.669		168.064	97.5144		48.4422	11.4593		90.8683	17.0194		137.38	27.1641		35.268	38.506
	2.89749	94.0497		112.941	61.5847		90.1016	10.9895		109	53.0643		185.757	53.8836		107.064	19.0606
	2.96347	66.0199		171.992	158.908		50.2145	55.6566		98.7514	24.5399		80.3142	32.8262		116.325	26.1
	3.28743	137		6.89344	134.498		70.5509	15.2763		125.819	85.926		135.991	141.449		75.6234	21.9913
	123.376	37.25		120.012	141.743		67.822	11.786		98.4684	60.1277		106.474	26.4064		41.5865	44.0553
	155.752	39.6077		156.921	96.7101		39.7061	10.9721		148.461	5.51386		135.829	21.5613		142.133	39.8974
	184.65	13.7527		44.2724	158.148		35.2749	33.6011		128.458	56.3417		83.0943	67.665		115.704	44.0263
	139.928	77.5389		215.658	138.819		53.9472	15.1192		107.581	87.7364		131.909	30.1771		98.3604	20.5953
	117.438	59.9114		160.281	33.2784		54.9497	64.5702		122.591	41.2008		136.073	54.9378		67.4093	57.0391
	137.185	35.0983		103.842	199.609		41.4503	95.6568		96.6744	44.25		177.461	128.583		118.57	14.1492
	163.682	88.0777		140.966	36.8057		64.5887	47.723		131.34	38.2363		288.304	89.2607		33.3398	30.0891
	31.0503	140.851		84.8937	82.3		49.5459	6.71556		130.946	19.5285		131.335	25.8816		49.3507	14.7963
	154.278	15.2466		41.8268	30.3247		61.1839	32.0692		65.9685	65.0332		90.2461	95.0078		48.2574	18.5505
	142.176	28.1134		212.766	26.711		61.9364	14.189		40.1609	22.3009		139.302	81.9113		88.4407	35.2871
	139.718	16.7283		144.669	30.7235		43.8322	19.3704		127.429	18.1795		134.614	172.639		61.0302	36.4132
	144.236	90.9734		117.884	85.9459		44.6099	120.272		7.88732	18.8473		93.6486	26.9839		92.9291	59.7168
	144.013	37.4883		201.917	9.86422		132.711	165.016		102.904	45.9199		183.496	105.512		83.4305	33.0579
	170.725	58.6859		79.8446	22.7291		44.1353	7.45843		86.2339	84.8354		174.227	106.511		140.29	41.0707
	135.855	100.088		98.3158	164.048		70.1337	55.2884		122.117	28.7173		208.785	30.0467		109.345	57.1129
	190.132	114.583		82.6867	23.9293		59.0536	10.5497		130.341	100.096		185.021	26.0454		60.88	33.2332
	131.034	74.7525		77.4485	91.3544		33.3051	65.461		105.327	34.3264		154.636	126.457		61.0233	30.6033
	154.204	93.2		15	60.199		55.0677	64.3324		97.2812	20.9396		107.543	21.2257		32.2228	43.9128
	183.872	150.992		87.0925	174.021		64.0054	17.0027		141.351	33.5392		209.477	60.4121		113.401	35.959
	173.818	178.775		96.6878	138.475		47.956	10.4855		102.501	12.4619		166.707	96.7368		140.625	29.2
	188.668	54.0856		266.543	61.7846		127.981	36.2799		102.386	30.1494		132.031	137.686		128.035	34.1692
	149.655	82.5995		66.8776	134.281		82.7634	69.302		117.381	109.712		144.157	49.5574		61.2012	35.4815
	171.867	11.0626		13.9384	77.7477		113.179	13.6053		54.0044	38.939		181.891	26.6754		74.0962	52.8846
	187.31	176.524		164.779	112.895		41.6506	108.475		95.2531	30.1785		130.437	69.6718		96.218	34.4659
	222.568	127.952		140.835	22.1651		171.831	35.6944		91.5746	33.0146		175.329	121.126		47.3954	37.3602
	161.541	111.478		197.636	131.617		47.0258	59.5749		142.025	22.6378		202.993	72.0444		268.973	70.1222
	126.913	53.0211		160.486	163.032		32.0184	16.2769		118.275	67.5815		104.31	69.5433		118.674	32.4943
	102.12	78.0205		152.344	74.2292		58.7957	123.494		29.3152	17.5		220.002	35.9709		72.5634	18.3853
	184.311	148.49		128.544	146.983		79.3611	58.059		111.794	35.7915		179.501	81.2474		95.5923	60.2879
	142.338	116.068		103.536	135.289		57.4479	131.724		104.256	46.082		140.268	58.5333		117.511	36.9776
	207.878	78.1742		95.8576	160.159		148.24	36.8146		120.78	17.7984		121.437	101.755		71.3706	32.9171
	168.175	92.0871		192.312	143.673		59.3915	144.254		124.925	16.3422		136.55	63.8927		89.1388	47.0538
	155.326	104.397		108.245	37.676		65.0233	7.58842		111.871	101.193		89.6782	58.7892		94.4878	39.9668
	72.4431	94.7762		154.927	120.463		53.6896	9.91724		118.282	30.0062		143.481	21.7733		167.629	6.00474
	257.22	121.406		133.073	136.269		51.6565	11.7546		106.396	15.9722		126.283	71.1008		54.9741	31.4655
	160.775	10.5047		135.058	60.5039		156.597	125.639		103.007	94.4545		160.646	29.8165		84.8455	32.0435
	121.036	159.66		121.603	193.47		92.2401	120.522		145.083	58.1772		155.088	133.621		66.6694	32.4902
	161.098	118.886		161.841	88.8889		57.6923	8.52439		126.306	53.7293		118.756	61.1356		64.4772	37.2795
	204.26	22.9267		156.153	58.654		153.736	141.064		90.0159	35.7398		125.545	28.3864		68.8627	49.7606
	200.242	33.2057		101.531	17.5928		63.689	105.624		110.339	39.5899		171.21	38.2945		166.646	31.573
	145.548	15.7014		149.671	11.3258		53.1253	17.6098		120.866	23.7328		159.845	109.91		69.1364	78.4968
	111.09	21.8312		132.292	127.169		56.0379	20.4071		96.352	58.9412		63.8929	86.3083		75.1132	20.6639
	87.6934	102.368		169.273	46.7295		85.2843	11.4076		114.755	18.0979		166.748	179.556		84.7594	32.4516
	145.196	111.285		161.946	24.4652		51.661	13.8461		120.055	17.8778		114.358	136.051		68.7025	68.5729
	213.11	146.461		144.387	159.58		25.473	12.0268		123.834	24.7505		132.679	39.7781		154.538	34.502
	132.137	102.889		140.255	161.882		59.4675	16.9557		122.341	106.26		141.644	51.5605		129.525	67.8375
	141.741	156.997		104.917	11.289		75	134.958		103.006	61.9714		139.15	55.9772		29.7235	43.1513
	223.116	98.8134		105.2	141.835		103.78	110.19		56.4124	95.3697		134.127	60.7444		79.2006	39.0711
	183.093	93.5981		151.483	94.6142		166.161	119.924		99.7315	28.0909		114.742	138.816		71.0943	46.7351
	134.306	96.2493		132.22	162.011		48.9914	7.57645		94.772	51.8299		219.951	27.046		58.3361	66.9574
	200.126	57.0795		129.671	19.3405		80.0733	122.367		102.072	79.705		123.543	95.2952		64.3244	49.2069
	183.972	59.9707		134.497	34.0249		69.7626	15.3807		111.782	24.4195		159.807	95.6718		76.9119	26.7533
	179.654	18.2709		166.277	144.299		38.9675	16.6406		122.716	92.8427		152.312	27.8526		108.429	31.0166
	168.038	63.59		175.807	54.622		99.6997	142.688		101.116	60.5013		145.826	82.4711		102.502	79.2366
	162.032	101.951		126.143	70.7815		61.1037	157.044		126.913	88.0708		194.042	18.042		43.544	48.3089
	149.906	32.1721		144.064	107.092		61.3984	26.0438		116.557	52.632		131.964	113.656		71.4569	37.682
	176.128	206.569		61.7463	61.2971		44.8677	131.841		99.3979	61.5348		159.071	78.6274		88.477	32.5085
	54.6006	44.0742		157.633	28.1271		52.0575	135.81		119.97	94.8186		191.665	91.7719		81.8964	51.3987
	188.436	89.9168		142.522	13.141		71.0269	20.0365		84.5146	51.353		164.998	30.9703		51.1274	38.5175
	156.248	21.0406		145.821	8.64241		64.2534	43.6815		136.498	74.1395		199.709	101.434		85.0817	42.2599
	116.035	45.8045		175.188	130.036		31.3791	107.799		98.5755	22.1502		125.795	140.711		119.927	32.7315
	145.946	122.75		72.2762	8.09642		115.788	18.3497		95.0402	52.1094		146.131	87.2332		79.1941	57.7511
	133.839	101.263		152.238	134.585		126.702	11.25		119.553	83.4758		132.227	124.783		94.7467	68.0896
	131.478	77.6452		80.8	123.182		170.706	81.8867		121.474	45.7348		131.385	69.8394		86.1253	35.5485
	132.481	115.105		171.293	109.462		108.771	13.2735		122.849	54.0969		207.898	35.5021		55.1413	50.7923
	102.098	20.8878		177.694	37.3741		94.0152	40.8498		75.6127	47.6026		238.469	112.467		62.3916	15.1205
	160.756	28.0867		135.277	99.3982		146.658	16.3158		125.641	25.0774		163.223	61.6188		37.8	13.9108
	190.997	65.4249		120.015	21.4133		58.6912	46.2545		40.352	39.9378		192.3	24.0994		133.042	37.0332
	155.371	96.2352		108.721	171.481		118.287	16.0559		144.31	65.799		112.294	81.0213		92.4623	88.0364
	137.505	80.1328		82.8601	9.92167		130.042	24.3352		109.576	39.4381		250.661	108.538		77.8208	35.375
	143.514	92.3964		122.882	143.16		165.889	91.5944		103.992	40.9478		144.7	42.9177		87.9694	32.884
	138.49	99.2377		176.298	96.3198		168.129	35.1272		54.7568	45.5471		138.09	98.5702		76.0594	20.7521
	83.6946	64.6111		163.678	22.8376		53.6353	8.54683		51.4876	42.2414		141.151	30.4016		66.3519	79.066
	175.46	117.165		211.317	34.7719		67.2318	106.037		21.9935	15.6916		193.175	80.0249		90.6257	34.1159
	143.773	162.494		92.3668	97.0077		73.8118	105.726		145.652	64.3026		244.883	87.2665		183.229	33.8945
	172.237	71.0024		86.7972	136.606		65.7727	54.5701		190.496	39.8095		133.74	25.3693		73.442	27.4486
	240.692	52.4021		166.487	103.678		44.5465	114.959		115.003	40.4832		156.098	83.9176		51.8213	42.3376
	177.921	63.0895		187.174	12.5983		46.5399	13.2968		175.953	32.3766		167.24	82.7985		120.781	47.0706
	157.94	119.855		167.033	13.2776		50.9327	110.168		64.6735	41.0107		228.661	36.2948		56.8667	42.1058
	157.952	99.8457		205.071	44.5996		27.0676	70.1211		88.449	86.7088		146.256	28.9424		8.22517	27.5618
	166.955	169.76		135.902	11.1522		53.2122	78.6183		113.365	13.3374		204.669	92.0686		132.356	41.608
	154.64	18.6646		124.436	167.82		107.883	15.9518		116.287	47.8307		180.823	42.6197		189.308	55.4816
	140.744	71.4267		213.964	37.4722		71.3407	51.262		130.616	35.7146		232.682	18.2748		117.829	50.065
	113.896	40.5083		113.441	58.326		79.374	17.1129		104.397	65.6253		116.988	54.1276		65.7576	25.4061
	20.3396	61.4402		150.719	116.459		40.0186	19.0676		152.197	63.9573		198.07	101.166		105.765	40.0645
	65.7258	129.015		161.521	116.57		52.4667	16.2401		87.1701	62.3778		227.019	12.7898		121.266	28.0039
	113.225	44.2622		119.231	8.88841		67.1937	11.265		88.9307	22.269		62.9759	126.106		85.5548	18.5876
	143.954	30.6594		127.515	116.211		152.866	43.248		99.1612	101.242		123.786	71.9913		99.4615	31.1288
	163.598	92.0935		176.557	106.629		106.763	28.7318		152.53	12.4795		134.56	110.942		70.8616	37.0045
	141.354	65.6586		170.06	9.19658		136.868	26.5862		92.2194	26.0592		175.349	113.248		153.565	40.9758
	155.685	10.4317		131.704	76.9942		134.042	11.0075		86.8538	37.8073		75.7579	41.2842		113.832	12.9648
	91.1762	103.563		132.361	34.0949		55.0818	180.092		80.7105	32.3842		131.759	65.1933		143.846	46.9304
	101.557	106.279		125.862	30.9384		139.062	39.7065		120.34	27.6076		148.907	130.391		64.3453	13.4467
	104.319	124.585		166.922	92.7505		174.016	141.881		86.2647	11.7842		40.908	108.719		52.9615	21.6105
	139.896	178.477		147.34	15.8552		151.027	19.6775		78.4721	18.9124		99.7075	29.2653		40.7332	42.9157
	88.9464	20.3973		172.699	157.589		154.674	64.8114		94.9325	93.0247		121.472	27.2509		110.956	49.0918
	128.911	93.1628		145.568	87.9239		103.91	34.4939		152.815	20.2197		151.605	21.2497		190.058	39
	57.2662	35.0177		158.689	160.762		37.5541	114.634		96.7876	14.7568		120.457	152.565		141.302	57.4286
	146.133	25.5737		165.804	6.19427		59.6762	88.3105		86.2622	53.5729		210.848	33.7548		63.0301	43.8447
	175.437	38.6759		177.475	150.361		9.25366	15.3278		116.091	21.4313		97.4699	90.6465		134.253	92.5168
	165.738	14.1823		142.982	105.777		79.287	100.918		80.5294	54.5209		143.246	28.6269		84.7227	43.0496
	172.3	143.804		90.156	51.0544		55.6636	42.0436		77.4543	45.2715		49.1782	31.3		58.0288	47.7104
	78.7792	93.3153		142.778	154.528		84.5116	24.9794		90.9172	27.3478		152.712	47.9613		68.7755	36.498
	94.5956	96.7262		109.507	107.31		52.5817	15.7445		105.778	19.7108		134.458	107.672		136.244	17.6527
	94.7525	77.3352		150.822	98.7268		61.6061	11.8094		164.33	51.3467		131.483	30.6024		78.94	40.5157
	136.27	92.1838		132.5	51.7275		25.3877	14.3275		105.343	44.1943		74.9825	77.8282		73.7348	53.1591
	54.8702	134.587		164.731	148.65		41.0259	12.5039		89.1149	61.7937		167.159	31.5013		101.172	39.2381
	120.452	36.9788		52.5393	82.3557		68.8259	126.569		123.296	23.8683		178.236	99.3678		79.309	27.9752
	139.819	33.1692		107.24	118.398		27.0126	84.1835		143.101	35.5706		85.9878	113.045		72.8315	33.8308
	148.995	46.6208		170.798	90.6694		52.7481	125.769		108.045	70.4758		118.426	114.443		120.145	56.5562
	176.783	79.9643		123.643	23.2494		106.699	16.9423		85.7729	16.009		157.032	163.602		75.5075	56.1762
	3.5889	116.462		130.902	126.559		36.453	142.705		103.989	67.7482		65.648	69.5379		152.507	43.6835
	114.739	21.5658		150.701	110.579		146.959	35.8357		123.205	68.8793		79.6535	137.97		198.966	38.379
	153.914	123.199		163.017	35.0633		69.7169	19.8131		109.445	20.4397		127.682	45.6121		72.8587	42.1487
	158.381	105.791		112.656	4.84498		34.3986	13.0893		127.706	75.8037		178.916	20.2549		79.6185	54.2834
	148.744	6.94815		130.443	9.42523		47.4232	128.986		111.424	12.4938		211.435	27.835		70.0821	51.1707
	168.652	7.41667		157.32	8.62324		133.895	6.25067		34.2688	75.4916		152.242	91.6944		125.74	36.6894
	107.867	21.2192		149.317	82.2663		81.3788	114.96		128.824	43.8582		153.489	87.7399		156.327	28.3459
	141.508	25.9248		156.519	102.964		68.7071	132.609		146.983	45.179		202.415	114.802		90.746	34.8828
	91.2384	43.4488		161.373	50.0024		47.5398	13.3273		76.8319	35.7326		164.05	73.6798		124.337	34.7753
	103.687	122.59		146.408	57.4217		165.749	21.3202		108.95	8.6449		89.4418	75.1581		57.3993	41.3809
	91.8444	10.6142		163.47	115.094		46.7285	17.3208		64.4024	36.0275		110.066	221.721		53.3985	46.8723
	145.82	73.4162		92.0736	8.7621		59.9538	20.4627		83.5395	59.027		20.1102	100.884		46.488	55.347
	85.9089	10.6868		120.251	165.556		119.466	160.886		132.221	14.4016		211.874	109.107		93.4184	45.4915
	172.324	9.45079		78.3718	91.2518		66.9862	73.7452		114.909	44.8273		179.113	52.2		58.6965	27.4788
	127.657	11.0584		121.73	99.558		129.454	12.875		94.4101	45.7034		183.145	123.378		62.2199	66.1993
	130.008	9.89567		153.803	7.34203		53.7627	9.73397		104.775	57.4767		116.567	125.846		130.719	52.384
	97.7542	135.78		132.257	8.98823		65.3282	15.9596		103.184	112.783		87.5268	91.0568		75.6346	41.1121
	120.121	46.389		159.497	120.945		61.384	15.0121		89.1049	39.7545		143.56	59.8811		113.552	43.3072
	159.553	6.98047		133.989	67.3011		66.7544	13.4409		88.4427	29.0942		168.974	72.8175		84.1029	47.1326
	71.5854	118.138		133.332	19.1305		66.1662	131.4		94.7192	48.287		220.074	37.4464		85.9145	42.1861
	40.8904	77.1557		192.058	7.25909		81.5535	81.5162		86	102.15		148.744	70.0077		211.248	54.0958
	100.961	32.2009		139.402	110.581		108.669	17.4174		89.168	66.037		131.666	53.3626		69.003	42.6921
	146.457	101.398		232.444	6.59483		40.377	75.6695		87.1093	20.4258		99.9846	104.462		97.1847	44.2349
	157.758	51.3294		177.944	135.793		148.034	23.9402		100.381	28.4021		143.183	106.738		64.3562	37.1949
	93.1406	87.928		77.2347	70.051		47.8606	8.64356		35.8864	17.3724		219.317	16.2233		171.251	11
	88.0881	82.8598		141.48	130.098		92.6875	148.047		72.3491	61.8459		230.347	87.5568		113.014	107.155
	147.649	110.701		106.431	11.7624		49.215	29.348		94.16	59.9114		135.653	88.8821		63.299	47.0127
	105.296	137.27		155.71	20.015		75.6958	139.97		39.8707	53.3805		148.758	93.1254		15.7211	25.8685
	62.5181	34.2659		80.6659	23.8005		41.891	14.1132		119.973	71.4545		134.465	22.0507		136.546	64.0221
	45.4947	105.189		166.493	161.303		136.525	72.4463		176.928	69.3485		177.575	71.1234		66.9289	17.7814
	137.796	26.6881		77.8995	11.197		51.4966	8.09168		90.5763	78.058		151.996	46.4		145.097	18.6425
	163.561	137.553		96.9415	149.254		131.318	69.5605		95.4356	94.6556		155.295	25.1053		184.392	41.3015
	31.5696	155.966		178.756	11.5653		135.837	19.8663		90.4867	63.0567		182.404	24.3422		84.9337	50.4139
	83.3392	122.269		129.052	52.6014		112.941	11.0158		85.9355	13.023		207.883	60.4441		78.3156	34.7902
	129.071	144.037		145.739	125.681		28.5264	117.701		113.446	49.9355		125.802	34.9203		63.2826	31.7821
	136.443	18.6182		76.3688	78.0055		55.6722	29.4157		119.15	13.1424		197.831	69.4967		31.3393	49.4337
	9.59177	17.0578		56.172	143.336		14.7962	20.223		131.147	82.6081		135.291	95.2847		203.478	58.2904
	177.025	23.4269		81.1256	152.752		130.045	16.2892		97.2678	75.3545		98.7004	38.9377		115.146	33.1091
	164.474	68.1432		132.322	150.386		136.598	59.7311		136.797	10.6323		162.07	32.273		109.583	41.0355
	112.19	12.2827		130.162	23.3747		65.6895	11.2043		96.1727	61.075		125.856	41.1578		98.0868	26.0167
	152.923	75.9327		74.2623	94.8741		45.812	8.79565		49.5041	24.6462		193.41	81.3467		150.15	31.8466
	165.04	136.117		120.244	51.6716		54.1454	12.4726		109.418	46.2545		131.004	102.404		54.2757	68.7054
	48.9929	113.44		166.532	36.2614		72.1733	123.163		101.594	45.7725		145.471	45.0307		94.0084	17.2515
	120.202	44.1404		31.0788	54.4143		32.4987	10.3443		87.2093	54.8105		162.021	60.3825		56.5598	46.5352
	194.422	117.397		136.693	38.0406		124.65	16.5164		120.028	71.4234		29.0845	71.0667		126.938	30.2023
	209.907	103.526		91.1299	83.9005		156.321	62.026		129.281	27.694		152.365	40.5361		89.9713	39.2431
	169.922	53.2656		75.9797	170.677		71.0399	55.7832		143.187	79.348		177.194	17.6287		49.4504	47.6954
	140.203	46.2929		162.962	125.114		42.3687	99.2241		94.9914	30.3982		182.494	43.1073		62.8759	32.1485
	20.1863	180.559		98.9167	42.5825		59.8566	25.5244		107.186	68.5659		140.469	85.7621		56.7747	27.8659
	121.009	87.2459		155.7	91.4606		47.3664	69.8157		115.533	73.4484		74.0303	114.453		213.825	32.5787
	107.637	171.25		179.34	34.7569		127.891	79.0761		97.561	30.9286		133.387	25.1638		65.2571	27.6129
	135.058	80.3697		185.361	151.011		58.6267	13.1208		125.495	23.4378		192.462	79.4704		114.671	51.0123
	130.399	153.018		77.7085	96.2604		55.6246	15.1348		93.9798	56.4093		160.968	82.9694		160.229	58.0455
	142.561	64.3648		54.38	30.7726		39.1221	19.4063		104.814	70.126		128.74	74.6916		62.8826	29.5114
	153.401	20.1367		137.411	19.3288		133.073	18.9057		91.7967	87.816		112.592	71.7893		139.613	21.8571
	174.139	25.8765		159.529	135.16		62.2017	42.9213		89.0561	7.41748		182.303	82.3173		48.475	44.4866
	132.356	60.9564		112.904	29.4988		35.4618	137.324		80.943	37.8516		108.873	64.518		131.904	41.9434
	139.647	30.0819		76.9759	134.376		136.586	39.8167		105.32	21.1526		102.295	202.837		130.092	23.1507
	179.541	17.5309		147.204	108.007		51.0738	139.656		156.111	17.1879		138.214	38.5192		106.757	23.6817
	128.836	112.591		190.811	30.8389		61.2837	154.17		114.622	74.7125		128.222	74.8981		158.745	32.8592
	139.94	21.8902		163.226	7.47876		143.92	88.9782		114.702	25.2944		138.441	83.8211		93.5247	41.5813
	72.7107	65.9648		132.177	93.4693		75.1866	66.3299		92.793	26.0436		90.0695	7.11651		46.8972	30.92
	164.28	50.6805		156.731	118.135		75.8825	35.9634		93.0814	43.7798		122.821	30.0837		119.638	25.2617
	49.8141	78.4779		179.767	134.953		117.736	78.3333		137.763	48.1274		149.739	100.886		125.834	44.8163
	131.243	167.016		108.981	88.5373		88.4505	27.0428		161.732	36.0934		160.758	37.4171		130.771	38.0556
	122.408	69.832		188.775	138		39.4776	36.3217		97.8902	118.675		157.631	34.3484		90.9973	36.718
	88.0791	55.9143		129.081	148.858		28.9617	113.201		83.9009	31.1376		125.015	25.5625		65.5423	24.0685
	68.4784	92.1571		63.9532	148.719		166.661	152.625		129.235	38.3654		109.132	157.946		70.6455	51.6285
	107.818	36.0548		169.328	107.904		51.3546	52.2742		91.021	23.8362		149.693	19.2809		123.023	39.116
	144.53	13.6272		72.2571	130.164		75.0769	110.047		115.659	60.7267		131.362	105.792		41.0496	54.8194
	153.398	132.569		171.452	78.808		49.311	19.429		6.53708	64.2915		298.176	47.3464		51.7133	22.1226
	127.26	160.789		102.63	150.321		86.0794	85.6523		131.458	20.7054		220.276	68.8487		107.865	46.8374
	139.621			170.808	112.369		184.943	32.0481		119.663	28.3172		93.3529	151.198		80.8885	41.2752
	173.438			190.401	80.1539		76.6712	101.982		123.503	67.6343		224.811	74.3137		110.761	38.7048
	67.0269			69.8155	60.8		38.147	45.8808		83.8187	28.712		97.3283	30.5353		119.607	43.3831
	183.029			174.141	26.3816		117.802	133.808		177.333	23.3668		88.9542	101.804		161.408	33.3231
	61.6477			131.287	34.6942		46.9027	27.4338		156.841	63.1936		146.857	121.868		142.575	9.57323
	146.749			127.179	33.1784		73.1839	151.227		102.737	18.0091		140.839	84.1615		48.9297	28.6017
	57.2453			182.846	102.565		68.3482	114.506		131.435	43.6112		130.446	34.7359		66.0224	41.1454
	133.525			129.201	128.548		63.3239	68.373		103.091	17.0312		90.9947	59.8768		67.6854	37.7405
	91.0833			128.585	84.7892		56.8836	15.5672		61.7791	44.9691		180.543	36.8462		80.8784	44.3395
	147.232			130.369	143.872		28.7143	26.3253		134.131	9.55344		205.891	86.6784		91.2422	27.0979
	120.262			176.247	123.234		61.0787	28.2025		117.624	38.5308		26.2617	62.1114		109.756	16.5806
	220.976			55.1372	48.0567		64.059	16.7143		131.065	66.3453		130.952	46.0392		102.497	38.4293
	124.152			57.8412	150.471		54.7445	29.4378		110	26.064		156.334	79.6783		135.136	40.9797
	79.435			139.86	128.826		129.214	14.4918		101.171	38.9225		119.979	95.2997		148.17	34.6014
	177.937			81.74	116.029		147.492	103.317		87.245	18.0903		156.083	84.0096		136.056	24.3514
	93.4964			70.1653	35.2857		66.8065	22.8133		37.1287	10.9348		53.5951	47.9396		50.2248	56.1835
	161.608			161.176	143.115		67.3039	144.979		116.501	11.9435		218.359	22.2727		221.72	37.5095
	150.188			86.3717	49.0657		60.4077	26.8289		120.635	49.5651		141.242	50.893		22.8468	17.2588
	180.13			56.6158	79.6281		56.9903	113.929		85.4051	10.6621		219.023	117.369		34.1417	57.4382
	179.447			52.6066	70.94		59.2669	51.3175		124.354	39.1292		111.563	66.1364		51.4364	133.43
	142.888			148.004	82.4659		63.5599	14.9539		91.4286	24.6381		245.49	65.5146		283.607	26.5768
	169.942			120.718	37.3855		70.3046	92.4875		117.927	38.5095		190.728	36.1638		166.592	42.07
	153.473			147.178	127.423		155.571	151.596		13.3305	38.6143		164.676	38.8804		148.924	39.1457
	193.97			132.546	125.177		112.478	158.579		99.1432	39.0214		164.356	57.3914		66.2892	45.4679
	115.832			125.243	50.922		81.2527	10.186		107.506	64.5705		194.379	49.586		59.0535	26.5066
	188.901			190.312	140.255		61.0582	160.118		103.823	29.5687		160.077	56.4507		137.065	26.8494
	100.274			200.395	102.119		127.38	86.6358		34.7602	23.7771		197.283	39.1472		77.9975	38.8506
	99.258			152.615	148.229		78.2809	42.6161		162.296	35.523		193.214	48.9724		100.33	35.225
	129.209			165.213	78.7922		40.3278	12.6265		160.831	29.0395		165.551	47.5397		69.3827	38.4686
	147.551			171.331	17.725		51.5734	13.679		86.7755	23.3533		96.4075	56.1148		113.57	10.4826
	137.772			133.911	13.7632		26.2815	20.061		117.087	7.43802		94.6727	70.7583		22.9244	22.8924
	102.771			202.691	144.987		51.2258	20.3235		151.062	67.1854		189.227	18.151		50.6985	25.3923
	170.471			114.553	93.8444		143.054	146.113		55.9881	47.8768		178.847	152.989		102.71	29.8252
	178.927			135.167	105.835		55.6521	23.581		116.82	62.7629		91.4511	38.8428		168.559	78.4223
	170.289			167.917	59.0326		111.716	194.968		132.876	21.2543		187.098	39.2734		93.093	47.5
	87.301			131.923	144.168		136.392	143.728		88.4991	43.3547		159.09	38.3141		128.416	35.506
	98.5979			187.385	24.6235		155.253	81.8842		107.301	53.3633		208.411	52.3636		133.323	57.2885
	188.706			158.734	80.2709		48.5165	10.8651		153.028	41.8244		196.306	111.573		115.201	41.6426
	104.635			153.68	21.9864		43.1731	89.8833		82.0979	33.5798		176.474	145.521		137.769	26.5083
	172.292			155.779	106.078		69.3111	12.4786		93.6417	21.2137		199.19	52.3596		167.757	15.6343
	178.701			119.464	36.3632		79.13	11.0714		97.7552	92.9235		256.568	39.7458		29.9902	29.9804
	88.947			142.176	26.2094		85.6331	9.23339		105.158	43.9681		111.472	75.5081		67.232	47.6908
	168.613			158.838	105.308		67.2941	117.537		42.1054	24.4726		228.548	40.1775		69.0581	43.0703
	137.011			186.704	5.1749		75.9563	108.828		138.783	39.8049		113.472	179.024		79.3266	47.1083
	111.156			138.101	6.77011		47.6646	118.446		102.465	38.8004		156.36	88.2615		44.8473	41.1079
	41.8058			37.4974	192.698		75.0143	132.122		91.9286	56.0519		185.055	65.682		111.709	31.8265
	145.155			84.743	119.686		54.8374	20.0541		104.322	30.3633		145.677	46.0561		183.872	51.8424
	258.535			179.865	82.6658		50.6439	42.7764		132.492	46.068		307.642	111.11		25.5167	50.6562
	118.275			195.156	119.493		36.6316	119.586		99.9682	6.91219		203.385	31.7248		96.1309	31.3667
	125.976			140.205	19.1848		130.582	90.5153		124.806	60.7799		245.981	93.9238		72.2629	32.0325
	95.9496			154.369	68.4084		68.6627	17.058		45.8587	55.8533		117.03	108.44		17.2596	46.4647
	105.984			148.118	118.39		57.8326	50.2574		116.438	41.6375		145.631	95.5008		6.71226	44.8311
	117.118			174.542	110.489		40.6381	18.6014		104.468	12.5377		136.67	88.6167		158.275	30.2234
	145.478			161.465	70.8294		143.165	25.3456		128.098	33.9397		154.758	28.9805		187.251	41.6473
	83.1531			174.288	184.076		77.8418	135.784		93.1846	39.3233		56.4654	197.609		74.8041	13.3568
	143.172			184.798	152.471		69.5748	50.059		122.849	11		162.158	41.7778		183.22	24.1048
	153.096			188.178	51.0561		123.118	178.898		79.0922	55.5975		222.427	54.7475		131.475	17.755
	55.185			142.663	56.9144		33.1602	41.2578		96.8755	84.2101		244.213	95.1511		39.4235	28.3236
	158.467			158.517	129.204		139.88	60.7751		114.191	28.7478		165.783	30.3127		90.3154	13.25
	116.031			181.832	132.195		23.0267	75.3929		131.942	91.6594		131.902	42.544		185.168	46.6526
	150.795			165.126	74.1017		70.7414	15.7534		90.1881	35.2676		170.689	90.0113		50.3837	39.0992
	61.49			181.866	100.952		122.043	33.3747		113.314	44.4326		335.137	51.0445		146.567	17.7324
	130			198.589	153.765		54.2726	21.5948		102.873	99.0396		211.545	89.6855		70.0909	35.5144
	87.8407			173.841	137.879		73.4674	100.695		103.816	43.5358		191.787	68.476		115.655	9.51603
	128.822			135.89	118.829		48.9389	74.5939		149.429	64.9281		147.648	16.9736		75.0413	38.8594
	128.013			184.211	34.7941		111.65	116.215		105.074	43.7511		171.6	130.961		56.0046	14.7495
	199.859			119.338	32.8997		58.9656	21.4821		73.8259	8.54878		146.583	12.6116		178.495	27.9355
	140.817			179.252	80.3729		155.14	98.3185		78.7019	26.0142		188.708	113.981		76.8597	50.3086
	151.049			180.522	117.817		68.6452	4.30976		82.9186	59.9294		103.809	95.6518		121.112	25.3333
	123.686			104.872	93.0096		39.2483	11.1719		79.5256	79.4008		129.956	38.8815		163.563	32.6412
	9.92375			158.223	139.389		163.168	16.4975		87.1446	46.1636		128.389	147.749		185.562	17.5802
	102.823			138.109	12.9145		68.7367	14.0101		88.8447	39.0739		199.193	23.3116		35.1891	30.5251
	163.458			177.171	123.582		48.2703	69.1432		83.4571	34.5686		217.105	26.6297		129.727	39.9203
	80.5225			150.963	96.4574		61.9608	20.3063		115.421	5.38889		129.325	91.8279		141.231	38.8209
	130.148			185.328	71.7802		60.4421	13.0131		100.105	20.856		132.743	119.877		97.0869	63.641
	70.7628			187.699	125.637		153.945	143.934		90.0879	12.3715		145.579	40.8205		128.67	45.9856
	176.426			119.964	69.316		65.3613	138.989		111.011	75.1085		88.6864	34.3988		33.5163	41.3065
	110.021			128.198	116.444		28.9157	15.2462		108.543	43.9854		145.932	26.4538		116.418	38.1619
	148.957			136.702	154.627		52.0988	113.691		51.465	23.3112		152.401	148.067		139.762	51.2184
	214.266			160.991	98.3103		64.7803	24.4972		113.609	53.4565		179.5	62.2335		108.956	18.4
	159.488			148.329	50.0204		83.9902	66.68		85.7483	83.4015		143.115	40.5379		97.3478	31.5
	114.442			181.909	132.969		65.3643	9.7464		78.0353	23.3077		161.118	48.27		115.828	34.5239
	185.507			160.923	49.2938		63.125	159.989		99.1974	109.883		96.3435	19.6578		72.678	42.8946
	154.122			150.046	114.1		76.1622	74.2102		86.3981	43.282		148.273	117.996		72.0665	23.9568
	198.738			135.593	142.554		121.461	11.7911		7.61795	50.6956		202.696	83.7301		93.9627	21.7948
	125.124			214.487	155.277		54.0859	100.608		117.955	95.9938		164.815	107.772		109.688	13.5175
	129.809			164.653	48.1728		51.6144	22.6178		104.897	25.7558		167.486	105.34		133.732	20.5464
	15.8333			199.006	120.282		49.4734	121.136		94.5391	43.0137		112.287	61.465		127.666	33.5412
	54.4722			146.292	69.3888		118.66	19.0959		4.65	23.9323		129.96	97.6859		122.129	11.6092
	137.987			173.361	137.947		166.621	26.3559		121.743	19.0621		132.792	18.0447		93.9788	32.0553
	96.396			214.136	116.394		129.093	24.1909		100.218	75.5615		178.926	28.9305		141.564	36.4901
	90.3714			171.869	102.807		102.991	22.2005		8.09966	23.2826		173.118	26.165		127.069	29.9179
	125.592			111.995	135.786		134.03	13.4454		115.634	29.2102		164.009	111.023		87.6926	29.502
	119.413			134.68	103.093		112.401	75.9656		117.049	5.95041		99.1037	63.4849		159.488	13.8026
	111.213			136.633	137.636		26.7732	8.95796		90.9535	31.5425		219.781	91.6803		113.412	40.7401
	169.486			154.76	140.55		140.487	45.7494		99.9633	73.594		114.812	86.8913		113.638	13.3887
	159.439			142.513	112.037		121.449	9.47911		122.473	44.8529		146.868	95.0577		25.0931	41.2961
	136.878			152.749	123.147		174.398	46.9492		62.9479	12.2059		155.509	147.289		86.6032	12.1871
	71.2783			164.564	120.629		160.031	138.434		101.961	60.0826		161.737	122.464		28.7261	8.38697
	132.39			190.602	129.268		118.101	89.4693		97.6674	64.8327		155.702	104.26		60.7846	80.0902
	148.742			134.741	68.537		74.4043	18.1743		37.5596	10.956		82.3632	41.9042		17.0969	30.2452
	136.224			101.613	141.269		74.2618	18.97		80.6262	43.0616		192.189	111.028		44.8697	88.2518
	142.567			187.2	35.4054		159.906	39.4521		75.336	90.0623		148.931	68.9124		144.94	29.5685
	107.44			175.745	86.8067		52.9702	161.345		116.307	43.3642		232.882	114.951		89.6267	16.3861
	75.0936			149.375	108.891		91.7224	128.561		119.642	91.6584		110.675	86.0418		59.6314	30.1614
	103.977			198.811	79.6952		54.0168	120.691		73.5221	39.3222		164.208	19.9748		37.3807	30.3396
	147.874			204.527	125.164		62.408	112.586		104.671	12.4883		133.788	87.1389		35.4037	37.2131
	138.288			126.471	142.559		35.7105	32.7356		117.33	19.9441		195.556	85.0402		65.8577	16.0219
	95.0151			136.233	11.9947		147.495	36.7445		49.8389	17.5693		264.884	97.9137		66.8226	80.2294
	125.383			148.571	142.879		49.5441	77.4286		105.121	30.3675		201.88	94.1622		68.6528	36.0566
	135.503			161.108	136.217		71.5256	37.4797		109.481	16.6892		173.102	73.3558		48.9205	30.6481
	89.2446			147.049	117.921		70.1893	11.0653		102.393	81.0756		178.961	18.4271		67.6337	46.4543
	83.1493			127.647	69.5448		59.6609	17.8049		118.102	22.4874		126.181	41.1979		63.5369	13.871
	143.325			208.802	106.139		67.2617	66.5053		91.8016	38.1261		152.346	43.1118		29.1273	21.5445
	116.715			153.917	53.4541		67.7304	32.4159		106.002	28.8919		165.269	35.7818		70.7737	28.0212
	109.577			70.404	128.816		69.1006	9.5034		108.709	61.5164		197.62	60.1919		334.857	84.8533
	183.035			204.388	6.68493		34.3599	23.3098		91.6584	38.7878		171.493	85.4701		39.3366	15.4487
	157.917			181.985	121.613		65.8889	11.6812		118.088	41.9167		114.234	53.4693		53.9293	25.5539
	140.28			228.82	96.9639		51.5421	5.15385		111.652	16.9719		164.669	77.9495		75.0642	78.3162
	83.3724			160.018	137.101		53.6514	54.9753		84.318	16.3524		218.219	32.9676		160.437	42.4717
	139.424			152.269	53.6884		137.156	20.7775		100.589	44.4484		156.628	57.936		87.2194	48.5273
	131.47			166.665	139.477		80.8703	137.177		135.721	38.4669		216.273	21.964		66.2466	18.324
	143.066			148.973	155.709		75.3471	18.3864		33.5062	58.49		141.827	69.3687		16.3482	24.6703
	92.7702			179.924	19.7218		100.877	21.9018		103.525	110.202		139.118	82.7027		132.87	38.8635
	144.529			156.399	89.1726		6.62816	35.4192		84.5822	49.6092		143.936	54.3592		114.359	21.4735
	155.457			143.23	89.2643		60.403	12.0568		11.1379	58.4408		142.982	59.1549		57.9481	64.308
	166.843			138.452	165.826		39.0339	66.9625		130.608	33.8685		181.682	55.2974		77.6384	25.3862
	95.5923			148.634	6.85325		80.2857	116.683		121.733	52.4851		139.984	197.45		31.6019	22.9208
	146.942			118.238	145.851		62.2368	92.9339		89.875	22.4723		129.402	40.8222		139.725	17.893
	179.994			170.769	10.1151		121.075	193.664		108.465	91.3774		136.313	61.8597		116.449	52.8406
	188.334			147.303	138.541		74.746	14.6805		39.0042	27.684		152.742	32.4391		137.374	45.0217
	194.222			126.588	57.9346		60.6066	21.0895		109.236	103.475		241.804	46.739		91.2227	31.8875
	183.997			159.07	148.853		40.0546	52.5783		47.6464	6.53468		218.703	82.6116		67.2476	35.4107
	122.535			41.2799	142.354		46.6045	42.245		71.7483	39.4007		178.796	23.1271		132.35	29.6463
	121.862			56.9367	27.8551		43.2053	179.886		96.4538	39.1586		149.04	136.149		36.6212	46.9524
	135.747			115.62	102.07		89.8419	129.991		113.29	55.6149		170.462	60.125		117.204	35.026
	121.685			173.665	131.379		69.2199	23.0493		100.235	103.068		103.767	176.96		89.3315	26.9629
	175.232			147.266	107.48		14.4447	80.231		121.272	111.83		230.324	111.12		109.631	12.2165
	171.522			204.067	88.3124		145.952	135.807		102.469	90.4104		131.094	16.2981		100.977	36.3453
	139.355			97.5996	50.3178		71.6029	47.9624		158.7	56.669		130.02	6.09266		146.208	37.3535
	147.796			149.995	20.8957		49.0605	47.8098		51.5266	111.011		130.32	71.2124		151.293	37.8152
	139.899			67.4721	103.82		74.6822	136.416		92.6461	45.8201		168.254	19.0911		96.4591	28.1556
	236.505			165.831	91.774		53.0526	164.831		121.136	36.7771		129.985	17.0683		85.5646	39.8162
	126.117			136.18	152.042		130.117	19.3834		105.074	37.7945		150.546	31.591		104.263	30.9309
	161.067			244.327	28.2167		146.65	126.809		120.008	12.0667		134.471	111.591		91.212	29.3849
	189.811			140.548	59.4872		142.045	11.8505		115.205	65.6448		128.386	94.16		54.4465	34.7282
	201.432			208.517	70.5482		43.6763	50.688		105.495	64.3738		110.936	105.017		60.7489	149.45
	198.114			163.064	15.5417		58.2279	27.9085		123.169	35.8821		104.673	23.9142		27.9654	28.7206
	157.27			85.2965	23.0904		137.23	32.0713		37.3454	37.3205		181.291	156.339		86.7185	43.2961
	123.759			189.477	69.3691		15.7214	31.0525		115.577	86.9426		212.954	36.1443		137.013	39.2644
	142.098			181.836	145.691		57.301	22.6524		53	27.8662		132.505	43.0077		35.5	14.4401
	141.897			178.875	168.573		140.66	20.4317		106.046	9.2046		182.744	59.4234		111.877	37.2478
	142.031			120.991	42.3599		84.3101	143.302		118.73	41.1972		192.99	41.0677		50.9589	6.11982
	186.994			191.698	145.062		54.6536	19.2735		94.2097	60.5235		256.072	76.2251		122.387	33.7552
	145.859			144.057	117.669		13.3591	22.5461		117.703	57.8967		250.438	35.6906		122.233	14.0802
	143.519			134.341	79.1296		65.2339	40.6719		125.849	82.4586		144.183	16.4289		122.334	42.9709
	139.993			84.1916	109.32		126.732	98.6108		116.72	12.9131		127.181	71.9407		54.3972	34.783
	110.638			162.474	134.8		78.2898	160.192		81.4362	69.1444		175.432	42.9036		58.9229	10.1853
	153.591			117.495	135.016		37.1397	18.4706		126.773	115.467		183.597	77.9259		63.3694	12.3046
	95.8947			181.99	62.7679		134.08	138.829		91.4634	82.9544		185.74	19.7801		32.7507	64.4124
	113.679			115.35	19.7654		106.618	31.9468		129.326	34.6286		130.845	87.9659		116.628	27.5
	136.446			148.973	130.341		77.2057	20.3169		145.078	35.413		203.852	17.8286		236.743	12.7253
	109.799			162.431	162.769		125.879	153.518		114.833	23.6623		132.872	39.6808		55.5955	108.376
	137.74			184.857	19.6587		67.8696	55.8656		112.148	35.5		108.611	26.9442		63.7046	49.9791
	88.0992			174.665	128.413		55.5843	36.5786		118.246	68.2847		121.742	109.022		65.0308	23.8379
	121.286			207.609	78.0048		185.981	105.202		96.5	37.657		175.139	20.2326		59.1132	16.9192
	102.26			173.854	72.6997		60.7541	24.3945		118.57	59.4828		124.62	74.1772		155.048	44.4345
	150.991			133.424	78.4676		136.128	16.5803		74.97	60.3407		86.5256	41.9612		62.5591	42.6006
	148.021			103.124	158.723		53.8895	11.0887		118.564	37.7976		273.612	15.1372		123.613	26.7581
	138.326			175.932	107.229		46.6426	34.3466		103.704	48.9917		152.966	18.8089		46.5805	26.4267
	103.944			130.475	99.947		53.3161	12.7798		111.73	93.0674		107.303	64.2651		49.1949	15.8371
	90.6178			189.279	96.7616		53.5195	12.2995		112.794	88.3452		117.522	126.336		77.0215	21.5614
	150.829			193.868	20.5824		67.8215	11.0179		135.997	51.501		146.574	95.7888		48.7467	53.4066
	135.144			170.794	127.669		96.1272	58.6344		100.989	35.7631		206.519	124.201		88.0295	30.7421
	150.158			151.775	111.287		136.362	16.5904		109.592	67.0576		159.632	30.6969		76.6651	63.6324
	97.521			163.897	86.5432		118.246	6.89767		112.194	60.3495		186.725	70.7708		66.146	21.1506
	139.72			136.914	98.8362		63.4185	61.105		37.7785	40.3974		156.175	106.632		38.361	44.7231
	176.1			161.221	115.382		91.8491	119.208		74.6514	71.4056		186.13	42.9039		64.9425	41.5448
	135.919			179.533	110.295		128.115	22.2257		110.216	82.7729		132.504	29.7723		73.1711	35.7548
	132.08			185.372	25.4879		54.2993	69.3651		96.9487	70.4315		178.746	88.1846		181.227	69.8487
	20.0934			206.341	33.7827		76.6562	16.6324		89.0926	58.4229		263.69	31.3765		136.096	46.991
	160.361			154.745	151.747		162.052	100.434		90.8256	38.6055		145.097	105.541		73.2141	7.9607
	139.792			151.679	153.163		157	48.5194		115.617	25.5882		167.169	34.0699		66.9158	26.4267
	145.829			147.23	106.888		68.418	144.755		105.046	55.9965		128.018	122.058		92.1303	64.2704
	189.535			176.96	41.613		47.4059	15.6312		119.641	25.173		148.027	27.906		122.862	24.0201
	170.273			157.744	72.7032		67.0287	9.91333		89.6997	28.3595		130.133	28.9651		104.879	48.2332
	132.792			149.369	55.6446		68.0833	26.4785		79.1657	37.5291		89.1265	22.6883		101.465	25.044
	165.733			145.033	83.4762		81.3875	60.6433		98.3629	52.7828		179.41	73.9286		100.265	33.6971
	165.776			139.64	109.055		125.598	14.8841		95.742	37.9492		259.396	26.5995		83.0353	60.3516
	138.716			134.561	131.699		63.6167	137.504		96.4665	20.3873		179.195	16.6615		44.5214	51.301
	93.0742			177.818	6.18333		159.858	65.4021		76.8036	22.7477		112.237	103.349		57.9564	45.6621
	71.2656			96.005	24.5086		124.319	35.2317		114.809	69.507		134.223	33.1141		71.5068	35.9777
	137.837			167.44	105.55		60.5294	32.2082		114.83	72.2647		175.66	69.626		77.4294	22.1594
	200.57			201.338	132.921		66.7143	146.863		16.7359	22.1966		178.005	40.3981		68.7479	20.1865
	197.281			241.068	8.30935		96.0306	4.64574		106.746	35.8664		176.83	124.507		58.6125	31.5865
	147.226			243.33	14.7651		76.7857	26.8103		97.8784	46.1176		175.802	88.3803		54.0577	18.946
	216.821			181.934	65.895		144.322	12.6054		106.604	52.4693		188.425	25.995		138.487	31.091
	84.7086			177.225	142.274		71.2604	14.8323		81.1873	31.8289		57.0274	118.183		156.777	52.415
	212.824			182.841	81.2355		158.764	11.2953		107.179	39.0881		159.208	31.8766		95.2702	4.18478
	182.838			207.561	183.552		85.2055	52.4015		78.3392	32.1228		157.735	93.7336		90.1528	17.4633
	250.831			62.7629	116.919		74.625	54.5103		96.1391	54.5794		155.015	67.7344		151.609	31.9474
	166.687			155.833	60.4266		81.6553	25.5106		106.759	40.9511		197.463	35.8394		5.75407	32.3057
	97.635			144.596	123.786		40.4939	21.0843		123.317	73.598		133.369	96.0487		68.3764	33.964
	150.852			220.068	21.2022		101.606	115.793		101.168	16.7843		148.137	43.1546		141.419	49.009
	149.998			143.586	164.852		58.6269	145.253		123.731	28.6512		180.781	17.2991		77.4286	28.464
	139.716			181.152	34.3238		100.3	27.8155		54.3507	21.837		114.033	51.3993		69.8005	24.9905
	90.1128			160.118	25.0495		134.629	102.408		89.1361	88.7711		189.969	119.275		83.8942	25.5472
	131.731			75.1742	19.2618		77.3432	41.3323		153.061	41.7238		110.444	60.6488		127.602	40.9566
	149.809			170.937	110.376		114.802	20.0397		108.973	33.7535		224.955	30.8376		82.9912	26.0261
	236.42			124.488	66.9296		146.481	11.9296		113.33	19.275		79.814	29.1148		108.559	25.8709
	130.062			211.511	149.136		74.9093	8.38197		87.9067	22.2972		160.853	86.9463		128.952	7.42816
	63.9377			85.1194	154.992		80.8368	60.6969		119	43.0826		153.614	25.7079		108.574	37.0061
	167.012			54.2433	11.0325		126.314	39.3796		96.6764	39.8274		138.459	17.4255		49.2492	25.4425
	160.296			176.64	48.1374		44.5846	90.3013		115.045	40.4035		98.558	26.1839		66.1248	25.145
	186.434			281.751	89.1635		19.2891	13.413		95.5816	57.4391		158.949	100.544		111.616	33.2417
	179.582			161.13	128.318		50.3904	14.1022		89.6179	25.6581		130.536	115.299		61.8586	16.1068
	141.94			215.872	177.073		40.5439	97.7478		105.31	85.9958		157.04	82.5306		95.3951	24.8289
	121.038			134.779	141.773		170.353	17.8511		96.8103	45.7893		145.743	70.6767		74.6332	31.4603
	111.276			249.462	173.783		48.2767	83.9747		98.9909	50.1318		10.4069	75.8724		125.939	54.2962
	66.0417			107.602	24.4575		125.014	11.8543		195.589	45.0792		171.425	19.8542		100.734	19.2274
	128.19			162.3	146.674		130.916	63.5111		114.118	59.8799		136.116	16.7116		31.3016	33.2053
	192.264			172.361	97.0745		102.481	60.8687		107.577	37.6538		116.899	61.4759		182.847	7.8557
	177.334			200.863	11.9304		70.5259	50.2084		105.192	48.8893		154.32	17.5309		44.7122	7.15445
	166.343			169.807	17.0707		118.398	10.0948		134.012	95.8168		134.648	42.2541		148.655	20.3952
	148.051			203.548	47.886		75.6342	16.4419		106.296	6.4368		183.632	37.8304		95.58	40.7797
	155.231			157.179	27.8521		16.2279	6.77475		81.5269	94.1146		137.589	64.3413		237.682	54.0742
	181.272			98.2583	118.536		40.8144	11.0205		118.308	35.5387		154.892	58.3828		157.087	41.0094
	161.717			189.7	145.327		38.9399	18.1447		99.3195	22.1675		152.578	26.8389		54.2232	38.0193
	153.813			128.019	17.804		61.059	45.9237		121.622	39.264		112.574	27.9824		45.4481	55.7936
	150.123			134.979	182.562		33.2955	38.4188		99.2068	68.7648		164.932	51.3737		54.9084	47.7778
	140.02			155.336	32.0065		90.1287	24.0554		91.7991	35.651		206.376	26.7136		68.2076	6.84345
	173.859			143.245	43.013		53.2982	13.6304		110.929	33.2533		105.871	27.2109		34.3353	40.7866
	186.857			123.236	31.6113		31.7021	137.099		5.4781	40.3038		106.377	66.1516		61.7004	23.7425
	186.987			140.601	8.56291		52.1021	6.96731		123.399	32.2981		142.57	37.4052		49.8338	16.6537
	203.24			169.984	113.507		38.4955	111.619		98.9809	66.5606		145.927	30.3287		50.4208	65.824
	139.268			219.316	73.0458		157.015	131.707		116.687	59.7829		189.59	72.9722		117.746	43.4732
	77.5438			94.8279	108.217		86.6199	23.9452		102.418	60.8278		254.609	42.7794		146.586	30.0213
	139.424			170.248	22.5257		120.787	41.197		88.8615	53.2293		129.772	51.047		49.2904	20.0705
	100.123			167.626	98.5425		131.808	9.6079		112.966	71.7427		175.09	26.2767		57.2715	24.8322
	187.164			71.8625	122.243		50.9242	11.6896		128.432	54.9669		262.425	44.4528		22.8451	26.7485
	175.782			132.276	54.1136		130.43	31.9942		110.899	128.067		194.064	32.0074		53.2334	40.5962
	128.152			136.881	115.855		88.3554	23.4375		80.2618	37.8539		132.384	39.2971		49.3019	39.2255
	109.462			105.852	114.275		89.774	15.6414		108.122	29.7463		152.114	38.3222		36.4615	29.8445
	146.243			164.744	163.461		42.1968	7.93686		29.5288	23.4051		148.495	22.2226		53.2763	13.5229
	111.242			84.0044	135.33		135.633	141.646		80.7175	19.3839		159.95	38.8978		136.257	48.9941
	129.811			134.171	71.1833		158.064	7.62559		54.0584	5.56466		137.537	43.7796		34.6628	31.4297
	90.0522			84.8246	39.0169		119.134	13.621		109.415	85.5533		54.3732	42.0145		22.757	27.3827
	177.278			107.808	15.714		50.0737	109.874		130.862	53.4453		118.609	112.61		69.1469	8.41206
	173.204			93.4679	114.239		92.2304	79.6472		131.86	15.1039		99.8456	65.7677		45.8559	31.4853
	145.538			151.502	60.0234		104.504	82.5142		104.118	19.4825		159.287	28.7368		84.7926	37.2174
	190.401			143.007	15.2136		62.378	125.755		100.213	39.0909		180.324	19.4691		121.396	23.8387
	111.325			67.7532	70.3465		31.9072	70.7886		97.9872	47.3757		166.499	75.3649		55.5793	36.9313
	120.801			76.4598	12.0782		36	24.8247		144.961	32.8767		239.688	54.975		167.267	30.241
	148.111			53.5749	25.0297		92.9326	27.8361		93.4242	80.7173		69.8298	114.245		108.198	30.0125
	184.768			61.5894	32.3819		80.5444	22.9974		40.1647	65.0097		110.805	30.4773		118.429	28.2407
	154.956			178.417	75.7083		107.95	10.0253		178.746	53.8005		111.645	49.7872		28.1796	27.0582
	138.423			171.073	20.7478		51.9723	49.3851		126.714	65.2908		133.851	45.5024		76.8285	36.7333
	96.7185			117.85	87.1397		75.9197	164.736		124.024	15.9096		190.629	25.8174		38.8706	36.899
	84.202			126.677	108.294		106.114	16.9373		87.3576	28.8207		192.666	139.801		156.944	48.3732
	164.222			139.996	30.7759		163.293	20.4491		92.706	88.9975		103.801	43.3753		29.8651	10.6166
	84.5759			132.644	68.3417		52.1967	7.03612		134.692	54.2585		179.147	116.058		65.2641	76.6589
	89.8264			144.652	163.504		132.447	14.8167		117.427	36.0194		119.538	88.393		118.5	54.6677
	136.544			120.019	144.231		40.2292	120.155		110.559	60.7471		169.352	17.5956		106.512	29.4829
	163.672			121.653	22.1378		151.447	20.2137		48.6846	90.9199		106.462	46.3455		68.5015	41.8603
	70.2987			131.941	55.8187		66.0536	19.0143		102.929	44.3674		192.94	69.9161		63.6943	35.1085
	152.284			197.198	83.7143		41.7412	19.9017		144.333	24.6651		213.858	72.8208		111.456	52.5067
	157.055			128.959	79.2005		45.9562	88.4729		118.405	43.3569		202.191	72.3791		99.5	57.0186
	102.599			147.359	117.926		100.922	13.8289		94.8507	57.0245		191.965	68.7967		166.769	44.015
	112.532			155.106	83.8016		60.7206	12.0936		113.273	94.0461		199.475	116.408		156.119	42.5213
	80.3503			163.195	35.4276		106.945	59.548		137.941	36.6437		111.28	87.8108		54.7657	44.4212
	73.7684			179.736	61.1736		111.444	11.1484		57.8125	51.8876		156.353	33.7215		104.747	46.0785
	66.1403			163.46	145.581		158.446	98.9161		119.612	39.336		152.247	71.3574		118.103	41.8148
	182.807			111.204	27.6007		60.625	13.7457		133.547	106.779		202.536	22.7536		63.6118	17.3232
	64.2613			163.055	105.316		141.796	144.387		109.005	60.9364		87.6328	40.5563		9.0042	17.2168
	98.2585			138.609	7.86913		84.4775	39.5935		106.129	32.3836		181.613	39.7347		144.596	26.7448
	181.242			172.059	160.792		48.9644	13.9247		109.17	60.7036		146.632	32.986		103.422	25.1842
	117.419			132.38	190.595		140.759	21.0714		90.1141	6.2094		132.67	121.143		137.84	25.7721
	174.838			213.027	147.998		50.1184	139.081		78.1018	116.828		215.897	44.6131		7.92553	46.4976
	140.569			149.529	72.1648		62.2868	11.9037		106.129	87.3329		213.791	28.5683		169.252	34.3842
	131.299			90.2876	15.0709		138.846	119.852		89.1031	86.645		176.907	16.6766		86.2517	41.7467
	106.389			190.801	145.347		52.1916	85.3565		75.3002	82.7953		161.083	19.1469		64.269	36.9478
	162.666			77.3136	164.403		65.2092	133.828		105.526	49.8713		148.447	94.3949		88.4966	51.8729
	120.328			152.963	17.7023		116.355	65.4485		237.477	45.5665		251.439	94.956		147.949	22.6517
	163.931			154.908	24.6083		124.304	16.7949		91.6527	80.7546		179.819	43.9169		109.476	18.9331
	141.969			147.219	15.368		60.7485	38.9803		110.177	91.945		187.942	36.7944		102.989	14.2784
	96.1063			142.689	152.942		110.627	50.9575		94.0991	133.845		135.742	62.4192		119.538	38.7367
	208.471			8.80488	152.78		154.724	101.772		106.048	73.9544		186.053	39.8859		134.701	7.06926
	76.0467			143.257	131.803		109.721	163.283		69.6903	64.5708		125.356	81.2427		99.9486	7.83415
	153.392			116.077	95.2662		154.6	32.0019		15.6443	58.6921		108.122	12.7775		113.142	147.168
	175.811			121.892	152.677		28.7521	16.4433		114.336	81.0264		174.875	82.1952		128.166	22.3035
	148.726			101.728	133.366		157.353	74.1062		88.3251	78.4955		156.046	92.1778		79.5681	95.5988
	104.853			112.921	142.565		54.2484	55.7995		85.4582	52.4089		208.864	42.5491		29.0633	61.7028
	141.754			121.187	58.122		37.0894	56.2391		126.019	37.4506		265.796	167.864		120.8	62.2925
	107.058			21.2862	150.476		95.2104	32.6106		100.6	19.5162		134.875	35.2231		145.98	72.209
	88.8742			153.764	124.261		39.2071	116.819		103.218	109.59		160.129	98.6282		117.099	33.8443
	92.5683			80.0518	25.1211		63.1783	48.9848		93.3307	35.7343		153.448	93.7557		67.4206	21.4017
	99.2797			34.5081	144.605		134.682	13.7743		16.5368	41.9866		170.553	23.1054		120.309	44.8015
	108.489			111.847	121.11		37.9579	104.707		107.707	49.0111		190.872	84.5831		89.2436	24.2349
	134.23			154.672	133.827		101.969	26.6586		3.59274	42.3688		165.562	81.9073		94.1102	77.1459
	130.285			91.5107	73.2857		103.811	121.849		133.25	66.6926		167.578	19.4409		79.4774	48.118
	179.578			26.8021	142.674		39.0244	94.8882		81.9955	58.7788		113.09	45.4327		46.8845	45.7844
	148.452			71.5138	173.444		140.828	22.2995		98.5953	19.007		152.631	72.6312		50.1224	9.75188
	143.244			136.345	137.183		53.8575	153.193		130.556	37.8641		164.01	98.3066		24.5836	15.3115
	168.623			144.875	106.144		130.162	154.943		53.7963	20.2355		162.269	47.3071		91.7736	29.2093
	135.417			128.933	16.1933		74.5777	92.5838		143.815	17.1979		159.796	28.8571		68.3049	40.6954
	176.148			167.367	24.718		77.0145	19.1108		79.2807	40.6464		19.7227	45.8272		134.333	18.4758
	124.148			37.9071	161.89		150.471	24.7396		98.2251	89.9461		146.473	65.0151		95.8483	22.3211
	135.064			143.753	82.9091		166.988	13.9307		75.1258	38.5517		106.855	28.0366		130.138	55.575
	184.21			156.123	133.471		128.449	10.757		102.434	37.0168		133.954	34.4775		57.1779	14.9784
	178.718			121.562	121.524		111.405	50.2756		120.884	70.1889		131.26	94.3636		56.2425	21.5363
	178.882			4.23588	126.091		152.133	68.4547		84.1245	26.2472		224.081	20.9916		56.9295	24.9642
	160.747			38.2555	26.8371		70.4941	79.4326		103.662	92.6385		167.303	56.9281		99.4469	21.6053
	159.516			3.72647	20.8698		74.1147	153.707		99.6317	27.395		174.475	40.8305		64.1067	35.0028
	223.207			4.41769	158.097		145.144	126.172		90.558	94.1961		198.554	84.8008		41.6723	61.2824
	210.124			125.051	156.753		81.9187	9.58032		128.719	32.6154		160.688	63.419		60.3287	36.0186
	90.0074			134.69	55.0252		138.436	33.7094		110.944	84.74		116.089	102.611		63.9906	50.6857
	28.2179			103.501	99.0987		123.379	18.4723		98.1995	62.869		144.938	32.3182		162.481	37.7251
	93.7423			137.377	143.842		173.343	65.9151		97.8414	22.4604		205.56	81.9245		106.982	13.5141
	102.126			180.667	109.376		144.135	110.173		101.486	65.7177		244.116	86.0063		56.2861	47.2531
	146.705			135.958	71.1962		115.779	7.31714		70.0542	35.4985		93.6683	106.1		57.4939	36.2
	143.416			128.605	101.48		150.211	26.0502		120.298	64.1963		219.396	58.2236		46.9821	97.662
	148.196			115.898	148.617		168.327	81.0561		62.767	68.1823		175.208	38.3168		62.4052	61.2355
	144.373			127.804	48.3811		57.7939	14.3944		6.89908	32.5663		103.891	91.183		118.093	40.5622
	162.688			111.715	113.482		53.0646	20.6632		108.142	37.6296		193.796	29.1915		55.8874	87.5497
	122.388			126.597	30.703		116.732	89.5705		135.068	55.845		162.58	170.814		81.9256	25.6978
	197.612			126.006	64.3411		112.668	4.18433		80.5821	36.5245		226.605	71.2669		68.9971	9.90493
	199.716			118.24	29.5379		73.565	11.3595		149.284	64.7443		223.671	11.0311		60.9742	41.0736
	181.31			99.9942	152.136		128.915	4.05628		181.956	73.8		42.2607	32.2143		87.073	51.3902
	231.142			141.305	134.103		45.3893	90.9793		81.9264	188.62		175.094	116.918		90.8531	34.7931
	186.598			186.368	141.049		50.3593	9.90492		122.866	53.5785		192.453	75.1607		30.2033	34.5694
	106.633			147.693	31.3543		112.224	40.1955		76.3588	70.2789		190.605	61.4532		75.6667	40.9132
	76.5274			168.995	118.293		62.6851	130.397		97.5117	47.3245		282.174	47.8612		71.429	17.8534
	115.294			169.335	107.767		76.5497	13.6921		106.276	8.27004		231.676	25.6708		179.635	26.1111
	161.025			110.258	35.2648		60.9541	22.4936		96.1188	64.1529		195.516	98.0107		84.5758	64.7163
	134.063			152.471	97.0985		130.311	92.4308		116.16	30.2808		95.9925	76.4335		62.8822	33.9381
	146.056			119.287	124.87		39.8479	12.8575		97.9794	33.3562		175.693	37.8256		71.7251	65.7935
	136.955			73.3753	29.1871		83.8725	146.203		113.278	54.5305		168.232	32.4344		46.2418	63.4863
	120.091			105.236	140.847		53.3699	9.29899		87.513	48.1573		198.244	74.4335		70.6206	41.3563
	155.563			169.122	175.725		48.5968	42.6989		112.371	98.1231		142.589	83.3868		150.119	29.035
	153.772			152.206	126.387		161.563	41.5783		91.3282	42.5037		166.451	107.327		70.648	32.5301
	185.85			190.954	62.3928		129.584	56.482		91.0603	76.0082		173.374	80.4639		105.196	22.5437
	180.104			156.906	29.3077		115.921	30.8064		94.7097	82.553		51.9526	103.086		140.083	34.3584
	128.963			156.587	63.1425		123.63	128.282		112.939	28.6179		202.092	111.418		119.553	9.61818
	110.11			89.7416	90.3987		113.567	33.8029		143.629	72.4825		186.7	10.5535		153.581	21.3817
	145.732			134.429	112.532		65.6921	27.8542		130.977	34.1718		134.324	24.3125		48.7819	25.3289
	80.6506			73.8865	22.6045		55.368	23.4429		121.115	31.4182		167.849	170.047		59.7973	86.2185
	138.294			161.981	64.6883		146.604	32.7713		140.888	62.9184		120.487	69.764		141.239	55.9969
	105.632			99.4702	79.1742		67.7397	16.0292		130.051	116.11		148.723	31.4181		58.0031	7.57709
	95.9552			152.857	20.9045		71.0748	90.9661		112.26	52.6131		226.841	17.8202		45.5791	16.9509
	102.931			173.665	147.436		135.389	87.144		103.893	134.217		147.809	109.591		128.842	33.0401
	117.434			58.1534	26.2222		52.154	30.7596		101.286	42.0607		92.4143	106.772		59.5922	54.2824
	124.156			87.5691	133.924		68.0097	22.7922		59.318	61.1723		227.71	53.0725		48.5619	120.625
	106			149.74	91.0689		130.767	20.3605		153.162	27.0727		253.642	26.5923		53.7844	59.1393
	117.325			158.339	22.5103		41.9379	113.51		127.581	85.4714		204.532	96.4509		84.2615	27.1438
	154.942			52.4061	151.655		44.2028	46.1988		161.976	84.8016		158.846	21.6436		169.612	32.3868
	91.84			188.035	135.742		59.4244	21.56		96.7228	62.1911		219.59	63.694		54.2727	9.4868
	133.47			168.497	145.497		140.35	13.9394		133.497	53.017		71.7417	23.9271		36.9713	31.8177
	133.221			67.9266	160.665		36.4097	12.4232		113.812	20.2093		160.616	20.5829		93.5982	18.9813
	137.524			207.669	108.107		136.901	8.35787		104.031	117.808		156.537	100.425		64.4052	14.434
	242.955			237.896	9.38802		115.982	5.82595		123.368	62.1014		128.422	31.6497		52.5562	14.9192
	165.974			165.683	121.325		12.3561	10.8133		112.878	40.5744		225.372	47.575		52.7645	22.1816
	221.463			126.717	126.846		157.724	7.37037		35.1462	18.3443		136.528	159.672		138.102	20.5979
	81.9924			112.315	138.818		115.308	30.3647		81.2985	43.8855		129.389	88.4458		52.8241	19.279
	175.531			73.7036	17.0539		100.687	4.92308		9.97531	38.4183		120.775	79.6477		114.848	38.3991
	170.857			112.215	135.105		107.096	56.4861		100.177	101.327		121.85	157.685		129.521	19.1328
	143.719			185.745	70.9258		51.3962	38.6022		114.058	62.5298		73.2315	21.5327		79.5413	9.38569
	124.454			110.118	141.794		136.683	117.725		116.413	134.649		190.712	54.4754		37.9916	24.1278
	207.209			106.017	114.434		46.8374	112.332		81.4765	37.9336		146.429	87.8009		84.8266	29.1067
	71.6937			181.408	118.085		8.09756	26.8147		100.44	48.527		200.618	28.4136		103.807	26.6088
	227.425			90.2676	49.0644		136.7	50.9458		82.3938	68.4468		137.345	53.9333		21.4228	8.99724
	149.103			187.384	55.0244		11.435	116.612		90.0022	44.843		146.206	42.859		55.4202	24.2304
	121.922			100.303	113.709		99.1015	65.8214		120.105	54.4398		232.039	32.7156		156.425	13.5649
	95.5263			179.747	146.429		42.6203	78.1537		107.009	46.2026		212.474	96.1056		105.685	26.5833
	167.258			75.0193	15.3879		82.0074	15.4153		97.5303	58.5581		159.241	144.149		146.072	48.1909
	85.0307			144.279	123.639		120.435	11.7323		98.7348	70.4326		186.093	77.1912		160.766	30.1601
	119.347			138.418	135.173		49.8324	126.359		124.127	86.3486		150.118	19.8391		79.1258	32.5417
	14.6531			217.194	37.3628		110.824	11.8862		95.7946	40.6116		132.209	14.9597		63.4136	9.84979
	122.065			128.555	169.936		103.369	11.0588		84.8361	101.648		148.065	14.9468		87.7196	9.83948
	235.583			129.064	184.339		143.738	19.297		106.276	36.2312		218.387	55.2135		91.4113	50.6784
	153.194			75.6774	12.6058		101.136	142.037		100.462	45.5869		138.142	47.2875		56.4831	38.7732
	187.233			191.486	154.644		44.0753	21.0859		105.376	40.7135		164.716	50.5756		54.0612	29.6667
	214.455			150.557	111.832		100.168	20.6309		123.89	63.3289		124.879	76.9693		44.9671	17.8091
	120.134			130.844	98.8311		46.0613	26.9605		113.536	23.1986		186.517	87.7957		116.688	36.9792
	215.738			170.196	79.9565		118.113	12.8489		105.06	156.831		197.967	17.8506		55.2673	10.4591
	219.802			165.415	149.958		134.15	15.5579		135.4	41.894		203.281	84.1439		22.1731	14.532
	79.594			163.329	6.12428		55.7044	132.653		132.317	102.247		194.353	38.2263		72.6025	26.2542
	126.787			65.9905	126.779		139.41	27.7158		105.522	9.86555		165.724	18.4474		56.8448	33.0997
	75.0145			133.179	88.4244		6.99099	22.1892		45.7635	18.9719		120.938	73.163		79.1881	44.9172
	180.427			118.162	95.4906		94.7864	15.3343		101.483	32.2313		155.036	38.6008		125.345	19.3677
	158.369			66.4942	120.248		47.8695	85.9874		131.963	53.847		53.8123	84.9814		102.689	28.1757
	161.743			169.943	153.55		137.503	13.2941		108.586	33.9315		115.732	71.8688		68.9919	16.5865
	47.547			84.8293	70.942		166.914	19.2434		99.9907	86.4021		263.16	47.1762		49.1189	8.33077
	89.9971			134.734	179.845		117.662	6.57367		84.3567	38.1799		177.914	140.506		64.8995	17.7212
	28.1397			89.1265	169.725		69.2638	29.5854		94.6653	11.3987		118.393	46.4082		54.5235	30.0216
	95.2815			70.8489	15.2841		111.366	8.59459		109.443	78.1959		157.056	96.8677		73.6735	24.0292
	108.258			173.459	125.276		98.5873	93.1124		7.73092	40.3661		144.21	29.4607		85.3391	33.7617
	166.546			138.256	105.314		45.4507	35.8156		102.754	15.3197		62.596	28.68		118.56	23.6006
	130.984			96.2292	48.1499		74.2556	79.9758		109.424	160.226		104.041	26.3002		92.5861	11.6046
	184.214			120.483	22.6306		131.37	18.2043		102.981	122.079		161.307	29.4073		122.636	11.2913
	107.308			134.937	150.248		105.349	17.3783		113.431	61.4		51.9463	67.0316		133.06	12.8651
	214.848			187.028	168.404		40.7857	16.8427		126.992	72.75		137.083	44.8272		74.4368	18.9315
	176.135			131.211	155.771		39.4684	15.4744		123.698	123.88		79.9927	102.073		72.5942	42.3042
	158.37			161.863	117.765		90.8182	12.1667		113.361	55.8784		125.421	62.5481		108.295	13.356
	196.636			94.1537	45.3679		89.3834	19.2283		94.4384	36.0519		180.594	67.7704		51.4828	86.2394
	121.275			152.52	14.5692		155.42	16.4152		59.2518	156.185		19.7402	159.759		114.529	8.04884
	121.739			177.289	24.7488		66.0123	29.5345		113.311	38.8717		184.971	35.2825		86.4858	49.7696
	163.482			163.823	25.2609		52.538	55.9017		115.998	41.7352		205.546	34.4953		83.2679	17.168
				193.879	174.17		94.556	24.2202		89.948	24.7944		200.439	22.2084		57.873	36.0524
				125.848	133.922		110.653	25.0111		117.101	71.7077		157.496	31.0854		41.5836	32.3264
				209.274	158.874		140.71	7.19433		114.941	16.7324		149.016	146.939		87.2523	20.1157
				136.466	157.861		74.1743	9.94495		97.1283	72.9137		157.269	95.9895		126.73	73.8814
				98.7069	187.141		80.0498	54.5638		94.5524	69.061		135.748	69.681		138.717	44.6217
				133.37	140.422		89.9185	24.9115		94.1903	52.7278		89.6364	15.4807		117.275	132.317
				48.5498	21.9119		35.0288	8.5218		6.23451	83.5777		142.657	24.4818		82.987	39.6347
				132.527	88.6123		126.934	99.9777		123.451	25.9072		176.112	121.045		112.382	11.0796
				98.7344	95.9601		98.0262	20.2785		85.7683	51.8287		132.745	48.1535		102.124	32.201
				120.727	162.83		146.733	29.0449		90.9091	82.2439		67.0686	16.6786		52.2101	24.7577
				205.42	10.8573		98.3528	31.3805		100.917	84.9325		150.268	26.2235		65.1332	48.9571
				129.446	132.967		110.944	15.5957		75.6698	125.223		42.7704	29.3382		104.381	21.6033
				113.706	141.35		29.5403	17.2699		82.3956	54.8957		183.96	35.5085		77.5797	22.6122
				143.814	61.678		42.0746	130.123		95.8493	130.803		138.674	33.4753		57.2162	18.2232
				102.285	175.273		90.9433	38.442		100.929	49.8766		160.178	18.3022		36.7661	39.9953
				149.429	76.6433		66.9816	8.67183		88.557	17.2396		150.225	92.8496		104.88	40.9795
				127.779	122.209		46.821	105.466		106.763	69.4419		130.825	23.0794		100.731	34.7683
				74.9952	13.5874		97.5989	11.7119		121.809	74.6081		183.017	62.8454		150.037	16.9089
				181.43	136.201		86.3957	17.7248		37.3074	89.7414		205.998	105.427		55.8702	11.0993
				151.944	11.6082		109.009	55.6913		92.4041	32.3605		203.946	79.082		123.668	28.8199
				188.238	20.8935		55.2282	17.1506		99.7884	64.754		111.827	47.9295		147.401	24.346
				20.6233	147.308		53.3556	38.5994		101.634	50.6753		105.298	52.5396		126.752	57.3654
				78.5175	18.8259		28.1527	13.6155		12.7185	47.6391		184.764	62.1939		69.4438	59.6022
				87.0263	11.1053		53.6334	109.466		95.2887	122.701		166.426	26.7147		43.4635	49.9721
				38.1446	154.634		150.414	127.144		111.512	84.888		166.926	10.3694		108.254	14.0758
				132.934	118.073		65.7462	53.7295		98.0587	42.1651		124.402	22.0178		119.568	33.5309
				168.53	150.036		127.476	124.367		84.6364	102.041		131.103	159.566		122.343	12.1609
				54.4338	65.6534		86.3646	13.1121		102.777	43.8779		120.412	65.3185		62.8604	66.4899
				121.715	88.7977		130.267	46.3178		111.312	87.8545		189.223	27.692		151.451	27.4751
				153.474	129.779		107.006	14.2782		112.904	28.9535		100.613	69.4601		95.4279	47.9829
				131.572	92.7851		9.55024	10.2949		93.9044	73.9523		168.017	147.765		78.3992	43.3392
				189.077	13.1942		123.1	13.2042		102.338	14.4719		209.657	40.4372		91.2918	20
				95.0249	119.343		68.5452	20.2803		117.127	16.6253		135.175	158.062		38.51	14.115
				179.808	90.3196		14.6336	15.3041		135.669	81.2557		115.407	70.0309		50	12.3799
				144.618	26.7507		116.027	47.1985		103.238	20.2143		183.062	110.322		78.7568	9.88444
				146.527	129.145		50.2305	56.4886		106.821	44.6212		212.007	49.1638		129.452	86.4576
				225.271	108.068		41.6118	18.8402		110.746	44.7513		77.128	16.1762		148.109	10.6626
				172.339	191.757		115.276	19.1777		96.5548	16.8267		206.21	38.9967		192.612	27.8267
				119.63	78.1722		14.0874	68.8841		98.4654	5.9009		143.746	52.9196		112.214	26.2808
				169.202	12.6187		133.287	24.6348		98.2464	57.293		193.608	45.8492		67.6453	15.4773
				184.517	92.1511		69.9752	128.761		97.5037	77.8924		149.478	36.6609		61.0909	9.02675
				161.874	15.2771		91.5884	127.251		139.74	43.4959		113.705	97.7982		65.2038	24.2779
				111.872	77.2134		155.209	28.0102		108.486	35.2347		143.548	81.852		71.9965	22.1531
				169.664	30.5116		56.8828	52.1828		132.117	51.7069		191.732	99.8966		40.3498	20.1944
				158.048	135.286		125.43	15.6421		115.518	25.6748		137.186	37.7253		123.746	36.8973
				156.757	170.969		121.614	138.569		130.559	67.7715		88.5906	165.536		29.7699	32.0626
				93.2394	50.4078		114.9	39.5872		134.545	28.7864		171.467	77.2032		199.615	56.4118
				172.241	104.207		96.4713	23.9048		4.96244	44.2094		148.094	62.1667		61.2347	16.6143
				123.443	120.125		65.6946	11.2984		132.547	24.5216		139.995	90.8848		90.4853	54.837
				146.108	77.3597		118.092	52.0255		143.282	44.5278		142.384	112.544		89.4698	44.5333
				109.705	91.3982		124.637	89.2468		121.97	58.5329		192.768	81.6174		85.625	17.9658
				154.145	132.502		112.28	6.91206		87.7511	43.918		132.697	56.1672		94.3254	7.61625
				119.044	145.332		106.721	18.493		132.065	84.7183		158.107	95.3618		56.0097	34.8241
				111.092	127.541		100.173	53.5964		112.741	102.372		123.803	23.0536		86.1875	27.2758
				111.416	118.082		57.2581	7.16342		105.388	9.85896		156.586	101.66		87.501	13.7761
				133.149	154.805		48.18	125.389		41.7087	45.3507		120.011	142.312		107.88	50.2605
				38.6177	148.068		56.4928	16.3018		101.02	116.932		169.782	52.3275		133.281	59.5269
				125.23	172.019		109.078	11.7323		126.534	44.3441		49.1597	25.4106		56.0866	94.1825
				58.6944	97.6356		43.5251	101.659		109.692	135.972		169.06	42.4842		137.253	44.7805
				151.811	151.005		91.0178	16.4204		115.732	91.2781		91.1788	73.3027		39.7195	22.5418
				106.501	60.6546		119.579	9.44589		113.5	29.9117		190.957	56.1951		57.4528	26.4072
				210.488	182.24		132.566	117.2		94.6552	64.2604		149.097	96.412		43.8554	70.3101
				78.7798	14.0189		100.115	33.1919		124.583	51.5746		132.377	153.305		132.459	25.3227
				163.137	155.22		96.7233	141.851		97.3604	173.63		127.616	39.1141		103.23	12.1118
				93.0411	12.4857		58.2017	31.0146		66.9585	72.1423		182.061	78.7528		272.922	43.1775
				179.682	156.103		99.7384	16.2776		86.7588	15.2544		94.9927	45.3021		113.033	12.4173
				126.155	95.2772		85.555	47.0661		126.185	49.4034		208.589	91.5561		52.6102	54.8728
				145.413	4.15531		108.158	44.7492		163.56	27.9268		242.246	165.522		88.5556	59.2876
				215.649	28.0048		124.439	50.212		111.209	46.2944		138.804	142.475		57.8436	31.5441
				123.311	120.141		144.706	13.6565		121.998	76.4737		151.472	31.4533		102.096	85.2075
				82.0775	163.243		169.194	79.7211		93.3104	64.1992		179.987	82.7655		95.7877	18.8136
				144.304	76.3359		111.224	20.4748		87.0139	37.2008		121.922	171.952		60.0108	30.8127
				153.542	71.0977		105.008	115.235		122.82	21.4073		184.089	49.8926		46.7639	10.3158
				115.74	28.3709		136.088	19.6742		77.7363	23.5783		276.671	73.2503		88.0577	44.3135
				122.634	31.8421		134.817	130.104		124.719	77.9764		112.251	62.6132		130.589	18.7838
				190.478	144.842		110.624	96.8046		126.201	36.7522		174.829	48.6987		70.003	27.9501
				123.605	25.3481		66.6388	10.0439		102.454	37.8201		31.4695	89.8613		109.144	16.9686
				72.9088	14.1446		70.1021	22.2976		47.3015	70.412		23.5473	31.7184		87.1012	33.7484
				119.493	144.613		128.623	162.666		98.4003	45.6496		153.037	52.0841		121.219	16.3485
				119.533	16.8144		167.711	16.875		93.0546	32.582		145.22	37.0521		135.605	41.557
				106.191	33.1658		113.824	30.5515		101.619	41.7893		82.337	37.5776		48.0857	73.844
				157.682	124.381		76.9475	16.739		81.7637	38.6417		69.7492	56.9791		40.0062	38.1032
				139.927	121.984		60.0274	13.962		121.89	57.7711		90.8627	107.378		103.897	60.7329
				109.645	114.527		151.994	7.10409		114.058	35.4866		91.2341	42.1562		36.6526	16.9355
				82.0983	140.007		120.267	132.227		129.871	67.3448		99.0524	118.511		95.8869	40.1953
				85.8098	151.431		111.339	49.2687		106.889	55.051		124.745	44.6205		88.1351	16.085
				129.494	117.282		135.613	78.1484		128.275	59.49		202.176	57.4286		201.447	15.4146
				131.373	12.7365		76.2556	32.379		94.4461	78.7492		212.012	143.481		105.126	21.6561
				180.799	111.289		167.458	76.6794		103.18	19.2533		147.395	56.4423		107.918	17.503
				189.251	9.84016		149.176	9.4801		104.609	97.5352		163.746	35.3143		85.3258	44.2469
				196.546	89.5105		135.283	50.2968		95.6241	45.4447		118.498	32.6414		63.8809	15.0573
				112.213	119.077		137.086	48.6742		97.1083	44.8099		145.05	22.527		66.7694	24.7198
				28.5676	145.892		137.599	34.4423		131.012	43.9053		138.74	111.123		131.244	16.6111
				200.782	155.731		140.318	102.921		138.719	40.1769		175.522	73.5		76.5903	17.5054
				160.027	95.4201		150.127	24.0995		103.431	67.9514		197.477	36.5179		109.588	32.7528
				156.661	69.6568		128.468	15.5457		97.2057	45.1024		114.733	128.823		157.005	56.7668
				186.251	173.778		136.146	38.9333		103.456	16.4799		208.368	95.552		173.612	22.7864
				151.213	23.7771		146.609	122.071		103.781	14.1313		75.0739	53.7414		71.977	27.3295
				140.607	65.6835		105.607	129		77.5514	56.7468		211.391	18.9254		13.9871	55.3566
				143.141	115.11		120.417	39.0954		161.365	62.8266		81.0181	30.2959		156.353	23.2862
				148.667	149.437		72.1208	108.816		88.2108	14.8449		105.055	117.608		124.087	51.6947
				104.043	127.384		123.045	45.5772		125.312	25.0031		169.036	128.484		102.621	97.8018
				209.345	48.7703		110.472	124.681		143.928	45.966		132.339	24.1845		117.97	36.318
				169.163	12.1387		129.397	12.0432		145.58	157.9		194.038	99.7193		54.1377	20.8365
				108.066	90.7251		51.3538	10.7574		116.569	30.6795		95.5465	24.7057		122.49	18.9282
				182.506	134.787		95.8389	9.58763		146.183	8.78824		211.679	36.0661		111.013	45.1763
				109.412	49.0187		143.589	91.2094		71.2194	80.0997		135.117	20.9431		73.0084	76.2818
				229.791	127.565		175.014	89.3979		112.748	76.491		91.1183	115.329		172.171	33.6954
				173.575	110.047		121.972	64.7988		97.4212	53.4407		176.082	43.883		69.3473	67.9548
				176.609	149.374		108.332	38.7966		123.2	32.8285		13.6542	30.4274		111.782	55.3993
				163.793	148.036		49.8625	137.017		135.264	47.217		197.152	101.272		101.142	10.1743
				170.646	127.147		128.316	8.34009		115.939	24.533		158.302	29.7713		164.124	40.4834
				148.044	138.443		114.728	128.854		130.016	22.9638		36.7479	120.897		82.7725	49.0291
				138.866	138.946		119.054	103.313		97.8273	59.7277		150.589	19.5145		59.466	44.1132
				207.476	107.749		74.4259	20.3481		115.914	65.537		288.508	19.2625		71.2134	23.9383
				120.886	18.286		146.359	11.9274		108.655	86.9647		212.862	19.7373		125.753	17.9318
				102.833	144.065		117.585	11.5165		118.865	5.53354		189.411	16.112		51.2908	30.5049
				149.623	92.4022		65.779	55.9661		118.485	46.6454		81.2021	108.6		88.7339	28.3906
				59.2811	12.6241		157.727	64.0069		106.826	29.4012		91.4913	32.7664		43.5376	48.4327
				109.696	103.81		116.39	39.5787		88.6367	37.7487		109.84	143.551		129.084	8.23809
				129.461	10.3389		115.447	15.6271		99.4662	57.1502		177.817	29.528		110.346	42.9026
				55.5536	11.7616		47.7147	23.1388		135.027	56.8806		66.6614	21.7477		102.719	54.6442
				129.37	35.6348		113.72	14.138		112.735	48.9895		145.091	43.1639		122.63	9.08333
				163.354	12.4039		130.227	103.257		114.246	80.3459		96.6031	117.769		112.824	36.2007
				124.691	128.924		165.281	14.6693		73.4774	43.6653		168.273	97.4518		91.8707	36.8696
				151.253	131.995		159.714	82.6105		134.323	27.6451		49.5526	145.134		131.649	10.8941
				112.059	137.178		151.332	28.2772		104.349	81.636		167.056	27.3445		101.575	17.0226
				111.222	55.6713		139.719	28.9147		97.963	57.4484		163.083	95.3706		78.1181	54.0368
				167.881	79.445		126.82	52.1436		111.063	50.4192		206.619	25.5844		122.719	27.4127
				145.408	34.1793		69.7713	25.3457		96.1934	112.34		155.524	164.21		109.045	38.5727
				51.6856	11.5392		47.6742	41.7696		97.8784	55.4805		153.985	232.481		128.327	19.0648
				79.0166	104.905		92.6389	38.6108		105.916	36.6659		187.235	20.4847		106.11	5.35236
				118.897	11.8172		164.262	12.6336		95.7023	10.3133		107.193	44.9261		120.104	9.8678
				75.479	139.43		95.4575	69.6334		5.71564	52.1344		190.419	34.3464		77.8544	24.915
				129.142	138.844		113.714	23.538		109.926	15.9703		139.724	142.77		121.263	20.8042
				60.8408	121.288		118.323	20.976		153.312	35.1694		146.457	16.8775		142.257	18.9435
				128.921	98.6078		132.872	77.4845		122.552	31.6626		99.2311	23.9805		102.439	10.3482
				188.381	45.0737		83.7806	127.77		112.594	11.4621		168.942	120.028		107.061	22.2519
				136.624	138.082		54.6593	32.5862		109.231	52.6818		170.569	28.6547		172.067	13.6923
				138.644	57.4128		123.574	4.6412		109.126	53.8063		104.698	33.4895		223.529	31.5678
				124.419	23.798		75.331	38.9975		113.526	68.5988		153.931	28.6015		37.5069	9.9551
				167.159	102.968		11.494	57.4108		80.3032	23.8991		147.753	163.383		130.739	15.0319
				107.644	124.51		130.723	126.237		156.851	82.967		19.1921	21.9068		98.6287	12.0259
				125.942	148.405		87.4703	40.9029		65.8145	88.5742		194.154	158.958		79.8866	30.8707
				209.798	91.0207		161.053	117.859		100.095	28.6779		140.213	17.4156		80.3413	5.84424
				143.385	57.3445		135.421	90.0334		127.043	40.3708		120.666	16.3194		244.084	82.2275
				138.64	154.277		85.5074	14.4832		112.136	34.9631		25.2421	34.3159		134.202	9.86579
				62.4478	125.196		126.092	20.9852		119.335	60.0047		60.3702	43.1763		80.8527	13.8227
				138.986	113.996		150.168	11.0983		119.969	39.2756		94.7009	87.9502		89.2029	16.5576
				139.602	113.795		134.571	20.936		119.536	8.284		152.769	119.532		162.656	13.3225
				177.192	16.5592		158.767	19.3972		36.3991	34.5583		184.407	76.3225		118.393	12.7428
				117.553	151.935		148.833	13.9066		112.915	26.6122		123.832	92.9716		144.038	55.216
				128.93	121.66		115.882	113.291		89.9135	7.07962		38.2658	110.504		145.603	10.7755
				67.9207	150.655		122.321	27.7291		100.992	49.0048		143.122	146.236		151.464	17.5773
				161.06	118.201		51.7756	13.5781		119.372	98.515		187.47	81.186		140.056	12.4503
				78.5886	143.427		145.741	131.704		93.4791	29.6997		67.4235	37.354		66.7928	48.5652
				124.724	107.73		61.3429	6.94531		99.8	24.8339		144.167	73.0163		117.799	83.9911
				119.716	15.3515		147.759	16.0488		135.282	114.836		167.138	27.4695		184.357	54.0668
				168.936	112.155		169.836	12.2028		80.6893	17.1036		155.858	41.2779		48.7302	29.7434
				48.1798	29.5471		45.8659	92.7132		107.485	43.1648		100.586	57.0216		144.839	122.36
				131.774	12.3709		75.2481	114.792		92.0202	18.9305		134.667	38.1538		103.41	27.1652
				147.359	137.088		167.287	150.114		83.7643	51.3444		145.112	20.4368		98.5069	25.4797
				192.318	71.7542		52.5352	21.1233		113.493	47.2555		155.358	36.5592		72.7477	124.915
				143.415	13.0975		135.264	8.63169		154.522	12.8123		171.552	25.014		117.619	45.9915
				115.574	106.589		137.861	5.30124		135.898	18.1091		143.188	47.8235		103.429	47.4319
				189.911	48.8833		58.3988	26.0786		104.617	77.5902		127.734	41.0602		193.589	29.6021
				129.739	142.844		100.621	8.04459		152.49	9.63299		82.8816	37		161.269	58.461
				148.84	128.127		137.877	18.3461		101.513	46.0751		169.338	56.9591		63.86	20.3444
				145.802	39.1605		144.612	23.5287		184.921	7.34826		135.98	46.8925		77.292	40.1714
				141.184	42.769		70.0961	20.1061		143.791	88.8483		78.2395	102.26		117.178	30.64
				112.404	58.6253		119.888	8.82561		100.822	35.6958		23.7847	18.4777		96.6549	13.6125
				147.976	68.944		83.226	11.2752		153.308	43.7268		145.018	29.7747		124.403	17.6978
				116.214	77.9494		139.865	65.2182		104.504	57.5377		132.528	150.728		138.147	14.1649
				178.802	131.665		57.5571	4.35477		140.557	58.6365		160.123	98.3509		94.8667	36.1287
				176.547	97.702		133.524	10.4769		155.011	29.8917		92.8206	55.066		71.0293	22.5672
				44.9506	58.4206		123.789	152.6		133.096	46.3441		69.1051	123.993		4.33333	28.4403
				82.8099	121.17		112.747	13.7132		84.2253	97.1433		99.7053	18.605		49.2409	9.53351
				119.854	159.103		112.567	11.9026		102.674	54.7857		140.009	75.8389		98.5831	46.6227
				53.5502	73.2597		109.215	19.6401		62.7025	9.14		177.853	80.4343		147.246	16.5413
				122.722	136.903		83.8704	14.0809		112.692	22.3412		177.707	162.737		119.926	18.3756
				66.8922	114.358		138.3	102.437		14.4605	33.7686		175.588	27.3994		130	29.9577
				168.991	58.7526		142.213	9.5339		140.665	42.2046		115.224	86.3534		129.473	30.2739
				69.108	174.702		44.6674	13.3325		98.2171	37.431		147.627	191.4		121.549	23.9688
				120.186	163.184		62.0291	8.80855		188.804	44.5198		103.138	54.9134		78.0234	39.5612
				132.573	71.9472		59.4796	80.7367		118.525	95.099		105.876	100.287		124.441	22.443
				148.823	181.539		55.962	15.7542		103.264	37.3946		179.884	35.1383		157.039	28.8242
				78.2015	25.1755		89.7352	132.446		122.351	10.8282		67.3227	13.8769		137.76	5.95979
				190.204	20.848		140.405	81.8785		200.551	81.6628		188.472	41.848		96.1515	24.5098
				112.309	128.695		29.8265	67.2865		115.239	115.904		181.032	19.0602		90.2085	62.2674
				101.363	15.987		165.657	12.0877		138.81	64.9133		96.2196	110.149		403.979	29.978
				133.515	91.9185		146.577	20.1165		117.417	76.3458		207.604	74.2466		126.497	28.256
				162.233	73.9317		150.629	18.3495		102.9	12.6507		150.251	29.418		141.716	20.4006
				142.834	27.9472		35.9866	23.1552		116.36	83.8607		225.029	79.1148		119.51	41.2029
				115.724	137.898		43.8606	29.9128		148.463	59.1442		144.598	108.112		184.691	38.5271
				111.66	41.3705		48.3982	31.844		109.312	58.1192		169.354	52.7925		113.379	51.5373
				110.118	174.397		153.989	82.4444		105.495	33.5639		120.35	62.7679		29.2227	27.1779
				118.558	133.721		158.501	9.78512		137.961	40.8661		140.563	79.2361		152.795	62.3883
				148.74	153.667		52.7146	18.4899		150.194	53.113		87.6569	141.048		115.71	44.55
				109.716	138.173		149.194	23.1995		108.751	47.5396		195.986	87.3831		75.4599	34.4965
				84.1517	126.412		160.958	20.6963		116.476	5.365		51.0464	53.1123		184.651	44.8223
				243.964	94.9004		41.9497	7.77609		102.029	32.3786		69.1357	39.9304		179.86	19.4019
				122.355	108.561		62.3966	15.4365		102.203	93.9976		144.138	75.899		96.3473	17.4752
				131.388	61.3956		131.406	27.3318		128.273	25.6094		208.481	100.73		93.3401	35.0215
				77.0785	148.998		46.8775	30.0459		116.345	108.94		225.61	42.374		123.151	35.3027
				244.819	48.5111		7.19118	25.644		137.35	29.5852		10.968	70.5		77.245	23.3526
				92.3865	74.9078		126.143	10.1265		111.723	80.6307		150.629	162.399		80.7283	60.1304
				170.766	98.1432		90.0056	40.8093		107.846	46.4136		12.3878	30.8186		65.5975	35.0685
				218.011	93.3949		37.2327	20.8356		112.959	46.2899		133.772	116.977		165.478	18.2924
				152.903	11.4709		99.0669	14.562		148.672	31.2567		101.944	48.0957		153.863	133.62
				170.599	6.53864		119.298	64.07		118.289	59.8704		89.2825	188.323		107.529	43.1805
				42.6031	14.4876		98.02	36.0633		151.973	25.3171		110.688	43.7475		59.9879	59.5949
				126.285	82.3544		152.157	82.1202		135.292	39.3069		241.803	106.107		106.871	28.2277
				139.694	115.304		96.5954	28.3073		24.2679	42.3435		94.5638	41.5649		40.2906	30.3012
				109.371	59.9955		46.8179	10.9647		148.753	44.5534		109.873	38.3621		218.98	78.4163
				152.264	81.4986		96.9266	19.5578		117.679	66.1099		296.865	50.0779		75.5886	82.4512
				189.962	20.0774		147.188	129.738		140.56	105.644		28.31	195.247		70.6285	17.9928
				91.2038	75.1036		12.4457	10.4109		104.593	99.6115		46.249	119.563		68.0047	21.8519
				152.544	51.335		118.113	149.645		113.798	13.1259		53.2632	66.1396		109.374	76.0846
				136.496	71.5673		44.5726	6.5942		96.6567	14.1698		180.65	64.9024		83.5451	33.2981
				68.8629	174.328		44.9749	54.1588		100.859	12.6314		162.676	39.0872		158.7	37.9661
				121.353	78.5607		66.092	19.2405		89.3713	14.2333		64.4686	105.524		87.8791	28.5627
				79.469	155		184.669	17.5104		107.745	53.0708		201.822	14.9324		107.461	63.7482
				133.857	103.079		103.21	9.46853		115.521	28.063		76.3368	136.547		123.84	40.0678
				153.67	29.3375		122.731	156.644		106.969	43.4668		155.5	59.5034		105.707	39.6447
				130.42	118.867		106.222	22.4394		86.2908	124.503		75.0096	46.8072		30.792	20.5545
				146.905	141.341		108.742	22.3628		101.463	60.8563		123.446	64.7865		153.241	37.3919
				185.773	113.821		97.0412	25.7066		96.974	118.556		182.787	23.9384		105.112	22.6895
				149.028	141.103		113.53	11.391		13.1872	73.0862		39.8266	58.8955		10.3105	17.8523
				130.302	141.19		58.4048	22.5587		132	87.7422		80.5114	35.9369		151.29	17.6362
				116.598	41.6163		127.763	44.9073		99.8786	39.5158		154.51	37.4493		118.012	20.842
				181.164	125.196		136.23	14.0566		64.3391	40.6991		162.532	21.4519		156.834	30.9618
				174.997	12.874		135.507	16.1797		109.115	33.1694		138.709	91.0183		117.156	25.4381
				147.548	127.856		129.504	36.3702		157.595	39.126		139.795	83.3575		147.652	27.1524
				101.705	48.2396		123.466	91.8175		109.582	13.1912		103.509	27.037		153.857	28.137
				137.212	152.179		117.093	10.3852		126.461	55.928		87.3554	55.4957		102.979	16.7785
				118.647	176.636		116.817	14.9547		98.2703	34.1073		173.722	25.9829		48.2693	16.3473
				120.499	157.726		123.987	92.0649		87.4828	40.4207		169.121	23.3793		103.889	129.755
				209.945	11.2777		140.852	21.7682		112.834	71.9816		226.285	44.5513		111.808	39.8232
				111.144	90.1928		116.765	23.2616		89	26.3837		125.074	32.5425		167.499	61.0246
				137.201	14.6934		69.0883	14.7543		102.647	22.5689		97.1223	45.0363		97.1148	50.9552
				167.743	87.2681		105.481	32.3616		112.731	107.353		177.709	37.4238		81.5476	82.013
				166.311	63.2734		57.6171	64.3396		105.073	58.2988		83.0331	219.079		191.723	18.8366
				129.414	132.744		145.082	128.19		103.409	45.0052		159.898	159.861		87.9062	44.3676
				164.606	9.47718		72.1838	84.8934		140.745	37.0524		192.461	53.4489		71.5273	32.4
				159.965	33.4238		53.9168	8.8567		143.238	24.6016		15.5535	35.5136		166.132	20.1933
				142.138	125.354		153.147	105.524		77.3722	32.0277		60.4691	9.9899		78.8063	40.5849
				162.441	92.8924		71.8721	39.757		94.3535	53.2098		125.397	103.894		84.6823	64.1105
				143.532	167.906		94.4225	66.1488		154.151	51.83		78.574	103.063		123.341	52.7355
				117.048	64.3784		106.339	99.6929		106.248	46.0846		131.284	142.159		92.7981	38.9756
				173.915	18.0359		134.779	59.2271		72.3145	25.1932		97.2985	25.4266		140.984	52.932
				115.513	126.256		53.9403	52.0811		84.4393	11.9519		113.1	36.2306		67.1808	7.93429
				137.828	142.25		23.0775	10.4513		115.926	23.2201		105.182	20.4102		71.4827	43.3446
				166.111	153.514		18.4265	28.3083		122.43	153.995		158.826	170.997		99.5608	53.4696
				27.2663	115.061		128.326	48.4083		158.437	19.5347		14.9749	159.344		112.653	10.8556
				160.262	135.888		89.4273	22.1511		129.481	16.3838		162.689	25.9145		71.123	10.4441
				183.243	132.354		69.7902	94.9836		83.1751	63.2581		179.878	143.272		75.1432	10.1009
				103.364	28.1424		108.409	89.7036		88.7608	15.2476		130.51	40.4731		97.168	15.1073
				121.56	51.2745		118.151	111.718		111.214	21.6835		135.475	99.7746		68.8704	46.8009
				131.343	107.574		89.771	68.2531		177.11	42.0091		17.0684	109.86		56.4904	58.5305
				92.0067	126.741		61.4746	16.9615		91.4877	5.04437		110.945	39.4856		135.291	55.2715
				201.566	17.1414		73.9118	4.85032		79.6977	27.0297		166.849	88.7926		115.067	65.6791
				152.303	81.679		115.815	104.008		103.28	66.4042		77.244	24.2995		139.731	39.7948
				112.277	111.633		56.8063	49.5878		134.494	56.8314		172.318	127.18		129.07	109.934
				156.222	149.457		123.36	63.3741		97.7411	53.5488		127.725	52.5893		135.959	33.1541
				169.245	17.9728		144.505	71.5028		89.1073	62.8624		122.179	14.2787		32.6533	28.3026
				114.5	135.232		127.64	71.146		100.111	88.7149		163.618	75.7308		157.391	46.7877
				108.419	113.055		100.74	47.4727		88.0097	27.6334		83.8692	146.778		72.4667	45.7134
				138.487	126.539		71.4856	57.7341		105.844	82.4311		157.354	103.348		91.8538	18.3357
				131.112	109.165		118.662	25.5195		168.92	51.8845		137.684	76.3897		103.832	33.6918
				90.6206	128.015		128.625	69.2676		119.924	25.3617		120.796	124.249		136.878	30.9074
				143.371	16.7305		135.91	24.2786		34.5367	63.8976		155.584	128.623		65.8723	44.4021
				140.403	151.246		110.953	61.8512		123.742	100.885		97.4082	18.3131		17.3702	47.6063
				154.759	95.1263		64.1092	50.0136		97.3589	69.9734		175.569	16.4058		71.2	35.0329
				202.301	121.58		127.944	11.1853		129.604	32.2512		31.4587	97.1826		142.829	54.8719
				233.733	86.3935		98.7913	25.062		78.5227	50.7879		141.607	24.5		115.881	24.031
				199.334	70.6856		124.672	43.1556		120.904	34.2746		175.236	45.8803		76.9802	38.8558
				140.309	7.90765		34.6532	64.1436		202.201	29.4355		108.624	110.522		39.4938	94.1854
				154.677	104.935		135.854	109.873		107.268	78.666		79.7547	39.9022		9.41868	81.6558
				164.575	146.125		109.099	110.559		107.495	58.1478		87.4474	77.2989		47.7787	13.7173
				120.267	150.318		127.455	50.0977		70.5538	50.5586		129.487	25.1421		96.1087	53.0366
				132.428	18.4521		87.5907	41.5711		54.8043	45.8966		112.203	146.024		82.1441	54.2957
				173.679	32.0521		17.0736	65.4133		94.371	32.0769		165.614	22.2762		125.231	75.1141
				146.675	117.826		113.375	32.8503		105.401	34.0934		147.042	56.2017		121.448	31.1331
				129.209	135.164		85.1414	31.9453		98.7581	81.2786		147.215	30.6025		29.8447	64.7871
				56.9366	27.7612		115.168	79.8204		88.7687	33.3333		126.241	50.7283		57.559	13.2997
				25.8996	134.538		154.635	94.8933		121.888	30.0022		97.104	52.0216		127.428	22.1005
				139.482	152.353		121.873	22.0263		158.623	35.4081		181.283	27.9836		124.894	55.6798
				176.173	76.2193		144.095	96.5197		60.3519	27.359		79.1501	72.0279		96.75	56.7263
				91.0413	87.7946		124.165	13.6102		115.946	73.3013		92.0544	39.8005		297.989	60.8413
				177.531	115.646		124.698	89.9068		95.1603	29.3131		128.434	15.2149		21.8755	106
				94.5464	72.9084		62.8226	65.8381		149.945	75.1048		37.233	111.412		94.17	30.3495
				167.503	98.8404		78.9515	154.534		100.937	67.6728		162.858	112.359		70.8112	10
				168.682	81.6282		86.952	38.7521		35.0885	38.3516		133.161	65.1371		81.7996	104.457
				135.319	6.175		139.679	16.4943		169.312	67.5369		113.278	141.794		183.861	45.8173
				159.046	60.1866		129.265	79.068		105.818	42.9292		141.812	77.9887		115.691	64.3087
				158.713	215.235		35.0213	73.4409		141.458	42.4118		134.561	31.3605		65.4173	77.2857
				167.698	22.6027		125.011	26.8391		91.1763	76.153		113.517	139.356		60.2073	39.2051
				199.927	80.6715		101.435	11.4223		117.033	37.1529		209.832	99.2609		123.845	50.8065
				177.656	11.4931		93.1131	56.0723		93.0328	47.0088		93.2929	50.3717		125.588	69.1325
				124.673	65.0448		156.839	13.8074		143.087	20.875		214.021	51.99		95.159	61.3202
				147.686	34.4019		119.702	19.6883		165.558	40.7476		55.2558	39.694		76.1086	21.2222
				140.351	200.4		49.1603	73.3284		142.324	100.135		37.8634	84.3432		117.499	62.5151
				93.2709	51.0749		158.45	64.0651		112.15	36.1339		214.568	73.8505		121.003	64.3628
				178.359	135.252		87.4193	11.28		148.559	47.5889		11.5168	21.776		132.332	13.1671
				147.064	90.7579		86.8169	12.9055		111.046	11.0036		198.476	230.125		56.41	27.6783
				95.47	119.286		97.2825	48.0216		86.9686	83.4919		59	35.2732		113.568	46.5915
				131.688	93.2168		127.725	26.1717		101.546	31.8651		50.8212	37.5153		131.184	74.0065
				123.523	141.142		120.437	12.0556		103.177	5.61379		209.283	41.2764		127.266	29.8086
				86.2176	152.022		109.864	5.524		118.707	37.1209		189.776	57.8508		18.2763	53.2845
				210.677	191.018		40.679	77.1288		90.3106	36.0548		186.924	120.529		97.2513	80.2077
				173.814	27.7885		130.712	14.0038		127.176	17.1454		221.137	13.8251		54.0554	27.2518
				99.2743	128.644		125.555	20.68		110.177	55.0704		26.2077	46.7506		107.77	176.687
				189.257	67.6137		61.4174	12.155		141.969	4.00779		253.482	28.8912		57.4075	33.6769
				120.587	103.768		158.036	9.21763		118.505	99.9613		194.95	93.3664		9.49554	86.3642
				184.255	130.189		128.393	14.8758		128.049	62.814		65.5652	81.7311		166.675	32.6102
				151.411	127.834		135.286	67.8186		128.707	26.6079		134.219	40.125		61.3757	23.2132
				105.724	113.67		122.886	81.4778		152.411	6.32627		151.794	17.8793		94.6702	66.6422
				181.457	32.0945		37.5457	68.2822		38.8173	37.346		248.671	76.3053		46.6077	48.5275
				171.477	123.873		124.622	64.321		124.016	13.0288		202.95	31.6998		57.2579	22.0756
				224.743	16.3432		83.9193	20.1304		89.6752	18.6691		175.881	140.544		179.664	26.8776
				96.6907	115.92		140.721	20.6918		133.838	25.7074		106.657	37.2439		98.0497	22.2267
				213.637	16.681		108.506	74.1321		109.292	26.5486		269.955	92.1269		33.5538	85.4373
				142.351	139.532		110.439	40.6983		99.0289	29.7412		173.474	136.141		136.998	60.1667
				119.606	69.0176		72.265	122.574		108.919	4.89443		146.291	118.293		41.3	30.3343
				151.648	45.133		76.0578	65.6898		206.456	12.1842		140.888	152.213		77.6207	45.5963
				136.552	16.5893		103.873	13.5989		118.563	95.3624		240.827	41.0326		56.704	28.9912
				204.378	128.639		82.9081	31.4327		164.616	31.3509		176.691	78.8137		38.0504	31.5954
				167.672	57.3037		16.1342	18.5196		139.242	35.6011		165.454	104.604		35.0783	69.4715
				125.054	136.111		122.085	25.692		102.956	44.9862		113.432	16.0742		76.4676	33.5866
				128.653	143.957		114.43	95.3265		38.1057	40.1496		173.08	103.711		127.203	29.9924
				58.4422	25.2294		48.6506	12.0406		141.706	18.8084		110.9	130.98		94.1242	119.762
				148.519	31.4082		116.212	51.9429		74.2207	56.0461		91.016	108.987		47.4372	39.1676
				105.399	164.705		53.3442	37.7855		100.592	32.5714		137.337	65.9578		64.7772	14.3529
				111.781	91.6061		84.11	85.9743		69.556	17.242		157.333	111.212		121.763	86.321
				56.7088	41.0064		140.96	51.5789		147.091	6.57767		132.792	41.114		88.1609	47.6288
				113.228	90.7663		59.1756	24.1617		106.716	25.7523		80.4943	81.8112		122.332	88.9873
				183.633	154.671		87.286	13.4332		102.606	5.23651		274.695	80.5226		125.383	32.9064
				140.086	155.065		13.7824	117.925		152.06	33.2293		196.825	66.5587		52.2153	40.3028
				116.551	110.305		49.3589	103.267		102.529	77.4365		217.504	229.572		123.465	55.8359
				181.022	122.124		93.5731	50.7605		137.934	48.9622		136.823	129.174		99.6093	42.5457
				165.217	17.7234		91.207	9.65583		141.923	35.183		194.421	124.448		107.914	34.9879
				168.985	17.229		67.1269	13.6534		103.737	29.7119		161.442	68.5051		92.8884	28.8979
				158.953	160.965		94.966	10.0026		138.911	32.3529		183.624	123.501		66.6126	26.0294
				143.262	162.768		133.363	10.1841		102.893	6.68165		182.49	58.6294		40.4012	40.8767
				123.583	139.137		100.102	17.0107		89.0833	29.2211		106.076	95.8805		125.082	41.7686
				194.048	149.589		54.5931	24.4439		129.835	63.1379		161.447	30.8994		109.977	88.5969
				209.197	60.8954		4.60072	49.5712		139.931	52.4935		85.1897	171.114		57.1444	48.6825
				108.035	89.4946		144.744	135.537		160.104	20.1828		219.812	16.672		116.417	19.9097
				161.287	32.4618		33.2472	52.7034		109.707	43.8036		61.7583	39.464		76.4751	31.8211
				158.873	133.944		102.16	63.7718		119.487	34.3155		140.225	84.7476		103.427	26.873
				147.28	121.056		92.6737	74.9014		125.543	16.8503		104.113	75.2921		82.0971	78.3516
				173.94	111.665		125.326	36.4808		107.715	32.3249		120.779	140.207		59.9257	45.218
				193.121	8.48288		98.274	28.2228		98.6458	28.4672		147.78	244.32		80.1115	27.7326
				149.984	103.785		124.964	8.6715		112.265	52.4508		82.3194	112.867		55.3715	43.8579
				149.723	61.3378		145.215	13.6183		100.153	78.9847		109.836	15.4341		37.4261	24.9499
				158.075	7.6808		101.743	82.8		115.669	82.0298		219.104	97.1835		159.601	112.768
				217.796	102.683		73.8535	117.184		178.378	35.8575		186.597	43.0854		156.433	33.7115
				107.642	106.52		43.1655	57.8841		120.676	94.2124		81.844	25.6454		126.75	29.284
				166.62	105.775		153.189	22.5539		134.453	34.2074		71.8293	37.464		76.028	51.6704
				59.9122	121.336		157.499	34.4652		113.052	71.0651		183.979	131.566		8.60377	25.1704
				179.818	147.654		125.444	90.5786		119.493	50.7514		144.466	59.9911		134.135	41.5122
				154.093	74.5931		117.617	58.9173		98.0117	31.1667		85.8433	115.342		71.5857	56.6
				8.28985	13.8528		149.358	8.19636		151.866	152.569		145.692	76.5184		68.8476	51.343
				156.712	152.703		44.0183	68.581		124.341	5.15238		206.274	14.8		73.5494	11.6136
				142.636	71.8792		172.36	57.9717		127.793	76.1439		73.6068	53.1726		144.086	53.812
				165.749	27.7386		64.9358	27.6761		167.894	86.4595		281.358	129.423		25.095	54.978
				68.6035	99.9203		136.263	87.5896		37.415	46.6579		189.289	21.5813		179.3	8.56302
				132.584	15.7666		130.447	14.4074		113.618	121.475		292.284	24.9771		40.2965	53.26
				134.397	53.8537		128.936	91.9735		148.817	94.542		159.764	165.861		137.106	50.101
				119.817	110.869		115.243	49.2563		50.3656	92.5364		23.6807	57.6394		8.23864	24.3616
				168.931	10.2098		131.558	11.1037		120.101	88.7071		216.967	62.3809		112.929	55.8726
				140.642	114.664		120.348	12.6102		130.455	46.5273		221.759	89.7149		57.4286	78.2273
				168.937	11.5345		96.3003	106.155		136.316	73.7317		209.854	137.923		103.561	45.5774
				166.787	98.7095		136.816	22.2464		66.7861	22.1725		109.395	64.8548		82.8822	27.9823
				179.103	110.129		69.1138	43.7177		119.189	34.556		202.004	100.809		104.413	28.2116
				139.215	18.9591		49.1813	52.7522		117.927	51.0463		192.856	83.3273		62.6401	77.4773
				195.418	127.138		87.4416	11.0199		145.562	21.1816		146.193	65.784		113.581	56.2027
				132.816	61.803		129.445	15.9144		116.455	69.7732		171.016	42.1141		115.151	21.0055
				107.62	91.8278		57.3324	12.2526		128.681	16.955		21.0901	129.393		65.1544	39.8006
				103.624	98.1849		63.5455	58.7257		113.449	92.0638		70.3915	69.4592		25.1058	19.3516
				152.69	106.153		44.1923	79.67		105.892	103.252		141.226	25.7288		84.7192	57.3722
				133.026	171.128		53.8203	8.08148		89.9218	114.576		171.209	19.2366		50.775	8.21983
				177.467	105.233		131.524	139.493		113.942	46.7482		253.182	34.6532		9.45755	96.3131
				224.476	117.979		58.1681	76.5192		54.1414	44.6687		188.491	16.4538		118.866	99.7391
				182.006	63.4036		91.9319	17.7222		112.613	46.8718		159.313	89.308		113.544	8.02842
				218.732	103.624		52.0972	61.5978		114.108	108.433		131.369	81.4371		138.276	28.3478
				145.215	86.995		75.5633	21.9426		119.026	98.613		187.776	45.6827		96.6442	47.2857
				89.3795	106.09		129.77	15.0986		98.678	55.376		110.633	57.2752		87.5216	35.3961
				190.569	86.6862		13.3333	46.0967		196.05	19.312		101.996	87.1751		21.5097	121.897
				156.105	7.29484		168.922	60.3415		110.881	15.0204		130.037	98.8358		120.698	62.8205
				149.126	167.342		71.4455	62.888		72.3578	20.866		166.314	97.5564		119.853	17.2042
				151.438	12.4297		66.1059	25.9134		109.55	21.0634		198.637	47.0108		55.5027	88.4486
				216.27	19.7805		140.049	67.1244		110.79	49.5875		144.187	27.1771		45.3697	118.722
				136.743	65.2467		125.791	96.0059		98.7512	71.3768		181.79	133.867		177.827	26.4824
				144.853	89.3508		57.953	87.9045		122.885	20.291		149.216	218.32		86.2491	21.0873
				65.3911	69.7305		152.265	62.7996		122.457	39.5321		192.584	36.5575		62.4809	32.5625
				230.597	122.27		113.525	63.6224		158.371	67.5986		185.615	132.55		95.9041	68.0951
				188.664	114.356		125.97	68.6502		74.5277	70.693		252.536	20.6574		156.094	87
				178.448	112.478		66.3488	55.806		108.056	16.6573		174.921	72.8593		80.1303	58.0741
				134.529	22.6048		149.174	17.2633		191.109	115.296		7.21379	27.4263		35.9537	8.50394
				173.852	135.753		140.962	26.3346		142.426	14.9588		22.6982	18.514		155.805	55.3599
				200.654	14.65		65.1285	24.91		86.4272	77.7		298.444	103.457		81.4978	24.1915
				137.415	118.633		57.3005	36.6915		144.913	59.4825		189.47	169.633		125.341	73.2429
				178.226	176.205		154.823	10.236		168.136	60.1056		155.891	21.1554		23.0507	49.1783
				224.923	105.241		17.9368	111.085		40.025	90.5931		176.87	149.815		105.124	60.9594
				82.6051	13.3041		97.114	60.4062		170.28	32.79		196.791	31.5148		92.5048	158.469
				97.0233	148.182		120.249	163.405		96.0764	77.2462		162.995	65.5303		114.792	69.758
				152.472	57.0086		137.615	16.4343		116.259	47.8562		237.978	13.0418		128.532	110.869
				153.976	111.312		99.3677	129.42		110.487	109.818		126.303	79.7893		146.42	44.6271
				213.095	92.7456		123.484	13.8736		110.404	3.49219		191.589	44.3444		144.898	57.0161
				115.762	88.82		96.2823	36.0873		154.096	31.7064		154.703	76.75		70.3242	41.0133
				135.469	98.3223		107.023	36.3742		124.832	90.2015		149.434	20.8732		102.039	74.4729
				166.083	99.4661		122.199	11.6205		40.1	27.8776		177.445	203.303		139.513	40.8656
				190.225	135.446		113.396	52.17		141.822	36.7906		215.1	42.7912		63.5994	56.3986
				211.252	69.7477		68.8561	13.5442		112.905	32.0705		192.423	25.8293		40.125	21.4768
				96.375	133.95		52.4107	80.7818		130.839	59.5311		235.298	73.6255		124.054	43.9552
				159.371	11.7536		135.133	9.65941		134.085	6.24057		149.434	124.774		138.38	48.6092
				119.152	166.661		129.387	66.4451		128.022	33.4753		141.838	48.8244		115.616	21.4967
				119.413	112.061		166.261	93.1491		140.938	32.2217		166.88	106.004		48.1704	37.0472
				104.721	148.741		114.73	18.0673		152.037	30.9508		176.097	149.957		94.7705	66.2145
				167.732	135.799		91.9501	101.792		107.535	7.67059		150.039	43.8861		65.7288	65.7839
				124.882	78.8404		126.86	45.6906		130.805	60.4267		24.0427	18.5694		76.7148	19.6928
				128.126	15.6285		73.5906	73.1394		143.775	28.2163		334.63	46.4634		25.262	19.562
				136.033	95.7922		71.2739	21.9169		119.79	27.4346		131.877	36.4625		68.0543	47.3663
				119.02	32.9045		66.6623	8.75287		106.024	44.234		205.304	116.495		52.1172	79.1395
				148.912	171.144		106.59	62.7828		139.033	40.3201		155.391	104.778		111.178	33.1794
				182.675	65.7471		104.822	38.3406		87.3417	46.8124		256.343	71.9397		6.70234	14.5101
				191.945	14.3517		81.2994	107.611		43.2041	29.9604		252.19	85.4837		141.411	33.2413
				159.589	55.1663		117.845	146.787		112.365	45.2698		291.658	103.056		14.2522	72.64
				138.583	17.1953		169.606	65.66		135.401	55.7454		86.6929	32.367		68.5974	130.495
				144.428	120.859		32.6478	19.2219		127.756	49.9438		183.189	133.062		123.523	12.9751
				188.405	30.2392		67.9367	30.4748		114.94	82.7168		205.331	74.1046		61.0808	60.4452
				149.021	63.3249		62.4272	76.7622		135.68	35.1564		156.759	15.4481		48.3139	90.429
				116.454	140.517		7.61261	53.1267		111.505	38.9025		188.624	20.2712		129.869	35.2455
				159.772	18.9673		47.098	99.8142		104.028	34.0532		121.508	93.125		140.378	41.3736
				137.784	60.549		56.9243	51.1382		106.887	12.6032		148.079	73.8299		128.231	24.4606
				28.3544	162.651		54.545	12.0455		173.781	36.4		108.299	97.9512		175.623	13.7342
				192.428	39.8393		139.83	16.2619		140.924	50.7011		124.971	40.5375		111.713	53.269
				171.68	105.096		47.9353	85.4903		139.494	90.2675		93.543	87.3469		73.0977	51.043
				203.986	39.5188		56.6386	13.0787		103.167	20.4164		97.2087	95.9793		54.4077	13.6549
				90.6011	55.6977		94.4732	56.7483		162.992	25.5237		133.586	33.763		9.76279	46.2259
				130.057	124.643		88.6061	84.2184		119.16	84.588		306.963	164.57		42.7385	35.9329
				139.564	128.048		14.495	55.3164		117.364	41.2625		146.457	48.6032		31.0597	74.555
				108.088	99.2749		67.8799	119.899		56.8205	42.742		193.424	73.9189		108.722	35.1509
				192.024	119.584		127.935	32.6416		109.757	50.9012		156.686	16.4491		138.247	21.6946
				141.878	137.017		61.6634	51.4464		119.602	41.2878		181.807	46.7021		83.4739	32.908
				205.768	144.306		143.012	16.6048		104.197	38.6716		168.811	29.8808		133.287	46.0202
				87.1474	125.798		142	23.6		141.609	22.4222		225.527	50.476		27.4894	35.13
				111.986	53.9313		10.8177	67.7464		119.961	79.7615		126.581	32.708		145.782	64.1567
				140.165	100.677		58.9755	47.4839		125.644	18.5198		184.622	27.0487		61.5941	16.1556
				189.075	168.922		130.928	68.8727		98.2075	36.1093		275.549	92.1034		70.9822	24.1827
				3.81081	27.2523		37.7939	63.5804		165.194	50.048		166.419	21.5718		85.4762	53.3381
				207.49	9.17929		129.455	84.128		118.638	27.8594		252.617	42.4802		65.3904	50.3181
				152.438	135.439		66.7264	86.8339		142.109	33.5523		166.258	27.4433		92.5519	88.3801
				55.4536	114.624		130.68	89.8414		127.491	18.1943		83.6456	203.05		151.023	52.4795
				158.622	142.204		49.7623	34.8254		124.117	59.406		491.469	106.992		91.5444	26.3255
				150.06	137.373		61.0325	9.32723		153.443	19.948		121.881	31.1872		144.342	14.5279
				144.335	10.3398		71.8006	30.1571		98.8227	39.0556		223.205	51.6886		128.409	36.872
				134.182	23.9273		135.983	134.186		85.7074	36.6167		243.288	58.5707		100.93	25.775
				97.6873	23.0344		67.4272	95.9901		151.889	15.6		145.051	25.3527		89.1471	30.4621
				141.862	40.8826		79.0126	10.8986		63.3559	26.0661		185.193	97.5314		120.873	124.222
				135.642	128.199		80.7636	16.7826		124.086	9.69505		163.095	121.876		81.2612	25.9792
				98.9791	155.42		124.063	47.5567		155.17	23.6081		320.315	33.9594		107.647	38.7862
				5.36982	80.5833		47.6134	34.8318		154.588	20.6087		253.923	39.0683		145.709	36.3906
				134.205	15.286		91.0324	88.5836		143.124	59.6413		212.318	146.007		74.4685	24.9928
				99.937	76.9267		185.815	52.798		123.342	38.1544		173.964	68.4492		65.9426	52.608
				118.823	138.334		120.075	25.3952		32.8134	19.5993		147.746	81.9406		128.67	30.6065
				127.107	121.523		63.3904	88.1257		134.988	43.0092		87.128	124.213		107.625	36.8602
				145.389	162.615		35.4298	99.6493		130.182	62.8333		241.214	30.8424		80.3601	24.7099
				22.8406	48.0941		45.1407	14.6375		125.918	19.555		361.498	34.431		62.2461	50.6888
				51.2413	60.2963		65.2246	56.3869		131.471	24.1802		278.858	98.3825		107.374	11.0125
				5.12452	88.3961		46.5372	20.6756		119.477	39.5187		117.177	49.3507		152.281	71.8293
				48.974	31.8289		39.1737	128.282		113.81	56.1161		210.966	111.612		16.5911	29.0537
				142.665	49.2321		45.4126	34.7718		158.64	21.5812		134.176	83.9835		21.2587	36.0662
				131.354	156.305		73.6227	32.09		131.735	20.5925		256.724	35.147		9.3115	52.8381
				113.599	43.5265		4.65534	48.2863		113.138	32.8566		131.45	102.8		124.751	120.612
				73.1979	153.002		145.922	55.9392		107.658	26.3294		194.05	252.336		90.7095	31.339
				11.6094	88.6904		57.2828	76.0311		122.706	80.2906		166.505	112.875		97.9337	30.8532
				126.758	131.69		45.3984	14.8314		120.841	59.5667		104.717	93.5758		143.157	62.5759
				91.8225	115.968		20.2512	56.5262		126.355	24.105		115.258	20.2574		55.2765	8.93767
				91.4313	46.3309		64.7597	77.9284		103.979	52.044		181.836	226.821		94.1171	29.6502
				112.709	149.363		142.563	43.577		144.145	59.3713		173.622	49.5846		59.3139	34.5115
				125.993	70.4806		112.095	12.629		99.5769	30.1324		182.384	26.6376		99.5403	162.423
				155.762	162.85		59.9579	72.25		87.783	9.36364		153.283	110.073		41.9379	28.9228
				170.811	158.871		43.9552	13.4104		121.184	67.9157		139.222	19.6872		118.295	13.2
				160.426	52.8563		52.6552	68.8418		120.075	24.105		183.242	34.8297		107.12	30.8654
				118.974	48.5633		118.899	21.5296		110.571	23.4825		215.806	34.9911		187.722	58.8937
				147.422	40.7977		104.65	71.8558		157.12	22.4208		188.904	245.483		113.513	38.5398
				119.368	33.6243		43.0473	66.9366		112.816	69.8521		262.8	60.4579		51.4539	58.5772
				89.0333	66.8314		61.0067	64.3147		110.261	24.0059		172.934	27.7107		144.463	71.6524
				194.803	85.2679		99.9452	65.3084		113.578	39.7099		181.308	144.14		115.963	27.9163
				120.068	126		138.389	14.0732		134.246	22.6443		216.096	30.462		82.3754	62.2165
				152.336	166.63		155.138	99.8015		130.452	14.2305		190.308	111.204		100.073	23.2379
				43.7505	170.413		52.7023	61.7715		122.386	16.5938		87.6868	38.1752		46.1512	31.0933
				107.734	143.794		52.5269	115.697		115.019	42.7235		206.462	19.7405		130.598	39.7698
				105.394	9.0625		44.1464	12.7251		112.139	28.3516		187.383	29.9503		78.5207	26.0093
				117.278	141.154		146.431	10.6629		135.667	22.475		181.85	29.429		80.5221	30.0095
				187.242	147.284		9.27119	160.847		135.525	32.9466		200.409	185.264		82.9471	31.8755
				140.972	28.9552		91.5159	18.8436		127.645	20.4973		122.063	23.6202		104.778	161.693
				153.511	109.073		141.985	128.066		114.214	41.4167		240.752	125.226		136.655	33.8831
				6.15686	94.6672		55.6675	72.8585		187.718	59.5109		63.2052	94.8722		43.895	32.6959
				163.745	42.8887		139.032	24.4139		105.549	16.4373		203.432	191.518		168.31	77.5494
				157.466	3.95727		119.066	25.8203		135.607	52.1606		265.581	33.8667		120.33	52.4102
				285.323	10.7963		49.2251	58.9433		159.542	26.3186		88.4977	70.7818		125.104	21.2121
				159.281	92.7664		37.8767	97.4377		137.558	29.533		231.202	35.3053		122.775	25.3759
				163.939	115.876		80.4696	23.075		132.455	31.3381		108.063	26.5163		96.5985	118.092
				132.147	11.5146		54.6017	57.6331		176.997	47.3272		124.938	18.014		70.4229	27.8794
				140.24	72.1708		58.8034	129.708		134.895	83.0839		198.835	35.3145		137.149	100.194
				40.5936	27.9604		28.9621	38.2181		135.604	45.5801		95.4861	42.1688		83.3149	39.248
				125.646	70.5021		42.4764	76.7703		103.212	62.7223		120.496	68.6578		145.741	29.9878
				142.866	47.1683		58.4733	10.2342		112.878	43.1316		150.286	22.6893		10.356	23.9614
				145.331	109.342		24.6832	142.339		141.126	16.8148		157.397	34.5195		110.593	7.71984
				135.674	17.54		53.048	56.7214		105.572	100.198		131.164	19.0454		104.687	43.9243
				112.731	79.9597		35.3713	51.3086		116.867	53.7854		201.773	26.9134		122.582	52.6857
				136.098	73.3149		47.6211	106.732		131.342	41.7262		212.276	46.6075		123.131	42.9186
				163.485	93.7018		82.7903	14.2476		129.383	33.1769		152.685	45.5336		184.655	39.2628
				200.203	31.9541		101.419	42.8466		148.992	67.9195		33.9637	33.3203		152.502	34.7439
				157.307	18.8241		95.4736	58.5378		134.908	28.3364		188.24	37.8233		82.1345	46.9655
				212.028	20.358		138.248	156.24		120.466	30.2784		249.845	28.3528		198.914	21.4014
				90.6879	44.685		55.3484	138.583		137.948	29.8744		156.75	86.1615		20.961	18.7016
				66.5601	183.889		100.967	23.3811		161.228	21.802		172.193	107.079		110.432	30.0843
				90.6647	151.812		161.592	46.8492		96.3518	101.279		213.372	114.011		110.021	53.5655
				6.07353	37.0818		65.6891	91.5185		140.056	51.9309		199.345	32.7802		112.138	37.3089
				88.1378	123.993		53.3319	126.281		145.73	64.5989		55.4431	141.718		105.884	52.753
				92.5277	84.7175		168.305	17.8662		158.172	21.6742		178.285	23.5505		140.301	112.977
				97.9197	48.6771		58.6146	20.5697		181.678	19.5133		52.8651	214.707		103.644	31.7932
				102.429	105.881		79.5594	115.98		123.977	13.234		191.726	120.1		65.6223	17.7746
				254.546	124.598		89.8513	34.4417		136.292	32.597		221.893	55.6758		30.5721	63.5687
				139.328	175.109		34.5595	124.417		127.141	16.3391		215.442	25.8681		25.7707	13.6823
				160.668	12.5995		44.0453	22.5699		141.075	57.6421		214.714	46.8736		61.8847	30.6847
				175.099	24.8665		56.0301	46.9585		128.49	32.6649		105.603	20.0505		28.5034	20.2386
				164.923	86.3249		44.9726	50.5438		102.498	55.627		125.991	86.5443		90.2398	96.7445
				170.237	125.242		110.264	5.67092		125.274	36.2356		201.621	132.947		127.634	111.622
				169.308	185.276		31.2286	30.4697		110.989	52.9032		148.186	44.0677		91.9687	12.9783
				162.288	14.0694		73.3928	75.7299		126.56	34.4325		201.251	29.2791		101.871	44.8594
				161.675	13.9516		156.937	13.8162		134.168	67.6678		216.73	24.9499		96.6483	28.7345
				156.725	14.4512		35.9048	23.1575		160.126	15.4589		146.309	98.8937		86.2584	28.5802
				179.086	76.8155		112.816	51.3117		103.475	46.3217		143.808	80.7177		27.3178	61.9157
				172.608	133.866		58.5119	52.3492		128.753	86.1796		164.788	31.7022		42.4841	41.1834
				171.715	103.735		136.548	113.371		119.069	33.0412		202.156	18.1349		103.098	53.9262
				243.418	190.016		104.177	175.039		89.6108	54.904		103.029	91.8702		210.993	12.5468
				188.327	126.842		53.9696	38.1003		118.991	38.9769		213.719	175.798		101.612	45.6834
				155.597	129.824		29.7445	99.684		139.73	31.6175		134.196	25.2974		129.051	42.0198
				122.114	111.55		65.6657	9.98711		130.966	43.1101		206.781	21.137		123.069	30.9083
				199.916	130.565		64.0898	18.2238		119.416	20.7799		101.424	149.225		51.0385	21.9414
				180.43	181.025		112.543	11.9816		128.171	45.5235		164.124	34.823		88.6411	59.9217
				89.5957	24.5077		122.687	105.044		131.854	38.1007		146.605	25.6458		76.1472	83.3944
				197.852	106.995		67.8568	58.068		106.317	9.56846		15.1784	54.2095		101.076	19.4157
				113.14	29.3535		57.2103	31.2331		92.3214	59.4325		241.463	25.8682		60.3083	35.2234
				142.858	69.7854		50.0753	20.6059		140.541	100.138		96.992	73.3676		148.404	21.5637
				165.766	79.4793		120.354	41.5509		159.087	92.9202		227.417	37.5513		29.7469	93.9805
				157.476	36.1348		64.0536	16.4323		176.61	11.4667		216.781	13.3538		70.719	86.6322
				100.759	97.0663		97.3382	66.7564		158.633	43.5665		205.498	61.7108		78.5388	74.1549
				118.442	118.58		61.5925	150.266		131.411	34.5229		215.521	58.7368		175.425	17.3026
				217.631	14.3403		96.7543	19.324		150.546	76.1272		219.551	27.7134		164.05	43.8136
				152.671	69.1026		59.49	59.4286		131.87	15.4638		207.129	42.9031		90.4227	19.1058
				127.541	43.1056		133.856	61.9946		168.66	93.6997		137.049	74.7996		73.2825	26.2867
				68.7743	156.208		40.3235	49.6076		125.27	40.7253		168.701	109.886		116.951	34.2337
				152.094	141.221		114.599	88.3972		154.597	64.3086		134.328	54.3464		113.923	47.1258
				67.1562	12.6803		143.323	56.2752		121.933	28.7065		430.176	149.146		63.556	50.1795
				111.907	37.2284		127.956	31.498		45.9266	28.3475		299.394	69.1303		89.5435	44.9384
				154.357	21.1417		169.19	90.1691		120.819	40.2392		142.823	49.3914		75.3095	15.3659
				152.841	49.5247		112.042	21.5096		101.882	10.5829		219.391	152.276		148.055	15.7929
				156.719	81.8261		52.6039	38.4825		155.237	55.534		129.604	49.1902		50.2522	51.4085
				129.109	99.3963		135.773	64.115		116.978	32.2311		202.835	16.6331		150.349	38.3676
				112.494	36.3951		121.7	175.953		174.543	46.5329		166.688	149.836		118.124	50.8434
				92.4925	134.711		132.541	19.5085		106.217	31.7627		172.164	107.597		111.789	6.24475
				133.134	196.943		98.1045	75.4071		110.225	14.674		187.775	54.3548		66.1527	27.7624
				108.206	38.0528		133.612	25.0576		135.761	50.903		193.707	47.669		88.3953	57.1961
				82.4672	130.083		9.73969	132.946		105.801	14.5886		205.544	113.011		84.9209	15.837
				138.054	53.2156		155.477	34.1882		96.9394	9.31663		145.274	226.212		57.7993	20.3726
				117.81	127.961		72.4344	13.2477		124.881	34.7541		71.9778	37.4448		145.706	40.4747
				90.3394	155.848		6.84075	46.2804		123.952	29.6364		149.214	27.2492		74.2553	44.9407
				154.831	187.355		140.788	19.1125		147.126	93.6842		221.257	11.5328		137.992	75.9394
				180.854	137.353		61.6759	59.8328		153.573	31.5679		158.372	40.1875		61.4913	65.762
				174.56	156.697		116.666	24.1823		102.764	61.7226		182.605	21.0614		85.2305	52.0123
				212.982	217.577		99.8708	39.1326		133.197	64.9265		181.227	104.846		117.437	78.8464
				169.186	119.475		126.095	134.969		150.4	28.237		179.984	28.7738		123.872	24.4243
				168.616	67.6119		49.727	139.689		118.931	26.9243		270.377	47.9319		103.73	50.7616
				161.529	48.0751		133.2	26.4018		114.954	55.6465		157.607	53.5299		100.144	50.4886
				137.562	52.1745		71.0652	7.44743		130.722	13.1395		182.554	17.6186		58.0241	47.2428
				91.4085	134.667		88.967	57.6747		127.833	75.9908		205.355	94.4733		90.332	37.1535
				121.488	106.543		139.012	34.0087		127.936	59.4028		106.93	33.4897		127.497	28.7867
				163.268	15.5094		67.9338	86.3825		128.332	48.3784		184.769	139.689		104.953	5.74785
				5.125	131.514		39.8728	9.38806		119.968	36.8032		14.0718	135.149		150.776	28.0736
				4.82629	140.866		103.484	74.1121		138.104	94.2494		145	16.8295		102.134	66.6068
				130.242	22.1625		121.767	13.2836		98.1024	37.0078		33.1373	159.434		97.3333	8.49886
				116.609	20.8825		46.9809	5.3662		157.322	24.8976		192.763	113.316		132.208	57.0255
				104.282	130.053		12.7387	79.3628		112.617	54.8898		225.414	80.8672		89.5703	30.3648
				158.04	128.464		53.0135	71.9418		97.8714	45.3213		162.572	65.3772		106.1	27.013
				152.218	84.0784		113.022	77.4548		118.668	22.4266		149.61	122.304		91.7552	47.6806
				157.361	84.415		14.058	53.9521		139.028	18.0704		143.114	264.905		40.7076	15.6316
				39.4222	106.706		144.886	36.0299		159.739	47.9644		177.66	24.5014		123.537	7.51262
				151.367	124.278		63.092	37.9362		101.571	38.9063		17.3285	36.5084		127.971	40.3866
				165.176	47.1165		150.204	42.0539		164.721	26.5817		150.561	45.6806		90.4143	78.439
				151.354	13.0425		114.984	54.4879		91.1676	33.3691		185.314	108.573		51.44	53.1599
				92.1035	25.1089		133.439	112.782		155.863	71.1849		154.917	39.6159		107.022	28.0422
				206.81	22.4216		37.3972	152.315		9.22747	47.4479		85.2143	54.0845		76.8546	19.3257
				177.751	42.0907		113.997	118.575		215.482	46.9607		141.368	84.101		135.384	41.263
				162.009	25.1058		137.977	15.2486		179.322	47.3433		206.386	91.3615		108.54	48.0446
				63.9601	79.0419		45.6658	67.3848		99.5924	50.3833		170.147	72.2956		33.5427	40.9128
				105.282	74.3183		104.633	80.7757		134.967	46.6765		164.046	18.1163		57.2684	56.0221
				175.967	135.948		50.6528	58.3163		45.132	52.257		205.162	39.9703		93.8721	57.7288
				142.776	64.5846		46.7892	74.3674		110.45	58.8649		129.632	105.762		109.129	44.8679
				96.7967	13.3511		30.6657	61.3569		135.095	22.1425		116.237	105.282		126.006	20.7217
				103.928	136.832		116.191	38.5549		122.095	33.1496		164.704	23.597		151.953	34.7966
				79.856	130.956		141.964	22.7591		122.03	39.2962		188.693	173.465		103.131	44.3017
				125.591	21.1111		147.646	127.659		59.6245	51.2454		153.879	31.9328		84.9269	49.1472
				147.991	41.935		44.4025	37.8402		119.145	42.0794		113.791	133.917		118.348	46.5879
				102.506	114.306		70.1239	128.461		119.398	49.4552		142.741	15.864		180.984	49.0412
				240.834	10.8057		52.6448	22.5868		149.959	91.0083		155.352	98.6585		121.191	16.9342
				153.061	62.3352		137.243	18.0098		129.664	36.006		279.455	28.5394		102.812	113.488
				80.123	205.223		46.7006	127.345		113.644	37.3396		221.362	89.2943		19.5738	12.3853
				88.2619	57.8599		40.5895	37.1364		132.953	101.093		141.077	25.4132		115.107	32.8754
				164.298	142.337		59.0281	36.1015		91.4034	6.1401		193.207	101.121		134.002	53.7089
				166.805	65.2367		101.927	10.6763		145.505	26.2645		276.97	98.8213		61.9527	32.5559
				151.283	137.621		55.3353	23.816		185.537	18.0659		139.952	62.5625		125.417	11.9557
				84.127	93.5403		129.529	133.291		122.608	27.5201		140.412	103.842		93.8275	75.7723
				92.9389	139.29		48.5823	55.8727		128.875	36.253		275.321	48.5976		51.1567	50.0985
				82.797	176.106		127.798	108.102		164.056	88.3979		156.814	27.6675		49.867	29.1986
				173.332	50.6582		181.968	157.897		155.634	30.5925		213.958	117.788		47.3037	58.1273
				71.7412	128.38		98.6336	16.8148		127.312	51.7263		192.185	41.7201		90.9157	18.4088
				96.8461	65.8799		43.9707	81.6389		166.828	67.5117		194.095	71.115		100.952	61.7738
				90.2852	135.003		78.2688	16.3091		95.3721	28.4112		139.417	37.0294		62.6465	24.7719
				89.6784	72.4107		48.1938	105.246		97.6129	61.493		197.917	71.3056		91.8467	34.4864
				54.7781	127.85		76.2338	80.913		116.116	20.215		61.7964	94.6325		104.778	53.3385
				175.701	162.966		126.677	47.8376		146.285	95.2316		150.742	81.2519		135.448	39.0231
				125.377	18.1815		118.3	98.0395		132.859	94.8461		208.306	25.1818		154.412	64.7044
				58.4225	142.067		62.7064	44.0691		44.1805	51.1937		173.692	39.2893		65.718	36.5181
				242.378	179.221		41.7312	24.0638		122.673	42.4234		230.635	196.706		204.104	71.5685
				102.718	25.4108		46.412	11.9926		119.857	62.7366		202.447	138.617		184.599	55.9625
				167.341	66.6648		111.263	14.0367		137.111	62.4316		135.193	59.301		173.773	49.6271
				208.76	13.0162		61.773	28.8433		142.303	16.2324		91.4133	98.5462		26.7143	60.3439
				181.998	131.235		140.784	13.3898		88.6342	19.3547		155.868	36.0187		86.7733	71.0551
				226.144	82.7802		76.7769	127.669		112.487	21.8746		183.768	173.483		171.369	37.3676
				68.6905	126.397		20.7143	38.6166		117.013	69.5885		113.528	46.3921		92.5067	117.367
				86.5306	12.3063		112.237	141.284		143.642	55.6862		196.691	70.4561		144.327	19.5755
				174.101	14.0967		67.1429	21.5359		94.7772	14.1384		197.628	58.7407		132.678	45.172
				100.554	168.928		44.5599	54.0949		103.422	54.625		38.2715	29.1626		169.81	26.8505
				137.591	129.276		127.267	141.201		131.709	19.3446		181.281	45.2744		170.564	35
				173.303	105.839		50.6427	14.5742		37.8084	52.4275		176.078	37.2509		130.232	7.01591
				136.967	185.435		126.657	62.934		103.835	32.3223		203.986	96.8675		99.135	13.9536
				58.3117	93.8164		56.7108	7.65108		124.522	52.4611		194.959	25.2802		95.1587	12.9299
				139.88	120.626		96.6033	69.7694		141.62	54.0084		143.392	18.5184		181.267	23.5174
				98.4121	134.082		85.5884	10.4165		122.484	20.2542		105.895	68.5086		191.285	33.0299
				97.1671	149.23		27.8026	50.0535		127.831	29.5381		112.336	45.6891		83.7244	23.6758
				121.081	101.165		109.023	44.1782		97.8597	47.7594		192.7	31.1111		106.01	144.468
				201.195	131.422		7.87072	29.8014		118.528	54.4142		158.188	45.1345		124.944	41.6519
				140.018	85.6506		133.389	48.6149		133.95	42.7219		153.226	25.8171		99.4785	39.2958
				52.6914	149.178		56.4832	9.46284		157.751	42.9664		192.698	32.4645		111.084	53.139
				68.7147	13.315		89.8885	118.448		104.052	54.3122		129.203	211.466		86.3529	119.034
				234.169	73.5611		82.665	30.2962		123.721	38.1785		99.9954	44.316		81.3813	24.1511
				92.7568	136.927		112.389	83.7054		206.326	15.8461		182.261	57.0172		3.85398	29.3695
				78.4479	152.043		105.335	33.4249		208.356	69.7089		273.855	40.6063		74.1082	53.0827
				203.225	93.4646		137.084	15.3478		96.3784	28.2384		118.179	55.1211		50.553	38.5854
				68.7739	138.411		97.2478	4.95536		52.1738	45.484		146.933	93.6051		194.512	56.9906
				145.969	135.698		186.441	10.9452		81.7556	114.334		118.478	33.0888		15.917	62.9975
				21.782	166.89		44.7363	121.643		121.255	26.8437		198.507	105.233		69.6746	27.2395
				65.2546	101.483		106.299	78.1425		126.533	72.2857		95.8889	52.3017		4.344	50.5486
				100.877	32.6302		54.1759	30.5544		103.548	54.6985		169.389	75.9806		98.4346	27.7059
				170.69	6.53125		77.9479	14.5691		128.255	57.7452		292.036	114.649		28.0339	26.0561
				227.32	106.161		57.6807	39.2259		58.7091	58.8647		189.195	68.8226		161.49	47.4035
				91.9461	153.789		99.4629	10.639		136.823	37.9873		32.6592	144.676		119.975	18.4643
				108.863	127.759		83.2348	121.315		192.298	61.4802		187.129	19.0143		120.302	20.3817
				102.352	9.75238		61.725	55.2418		141.905	11.7031		244.146	27.6946		5.68224	70.2198
				98.2266	150.975		74.0321	76.9478		110.889	24.7981		206.135	63.6799		95.7481	24.0177
				185.657	108.45		59.3664	81.4986		104.219	55.5098		208.487	34.2943		11.7102	23.527
				172.57	70.3972		48.1897	20.0778		101.557	38.8167		192.648	17.3725		3.31356	58.812
				116.731	54.5335		45.3011	22.3648		116.279	32.3775		261.702	17.1654		204.504	40.6133
				69.1037	88.7662		53.6088	88.5385		130.395	76.2101		142.11	136.1		62.7559	23.1683
				162.21	145.051		72.8772	15.6442		148.823	50.0118		148.604	36.9632		18.345	27.8607
				116.496	80.2659		159.847	23.5616		190.29	34.9397		281.203	27.869		177.038	19.0622
				153.711	120.436		148.113	164.227		149.15	42.0699		186.36	124.808		62.2283	48.4484
				169.053	120.968		60.8373	82.9462		110.918	20.0724		191.206	81.034		84.6438	64.8175
				182.054	38.4866		42.7516	68.8842		149.984	15.9866		211.675	28.4431		37.8413	35.593
				158.908	66.2204		62.4072	49.66		144.271	27.0625		182.448	57.7081		88.5031	49.0552
				171.869	140.352		126.31	68.1243		111.803	16.0804		33.3127	18.1949		74.3654	28.8525
				128.648	17.5687		84.2279	73.7178		88.9544	36.867		177.644	85.0465		170.118	36.9216
				97.2608	90.9104		26.3933	52.7244		121.018	68.0182		158.191	120.049		94.1698	29.5392
				147.971	105.106		37.1285	14.2417		46.83	50.5039		189.245	51.6854		175.512	39.8651
				118.368	72.4543		96.4652	12.5819		173.258	18.4126		137.597	154.592		9.59912	57.3991
				141.789	163.815		63.0411	18.6835		104.342	55.9883		36.3892	166.88		136.397	22.1003
				70.798	90.294		71.9804	10.6279		112.583	89.7195		169.286	113.231		93.4621	58.5429
				87.2725	137.677		84.2519	9.61889		130.888	43.3266		184.881	68.8723		4.41636	13.929
				157.75	98.897		82.0149	15.2456		121.432	50.5378		56.1797	123.571		51.1011	27.4728
				153.992	39.9586		59.7837	17.8635		166.318	10.8576		244.837	35.1279		133.406	32.5063
				149.682	84.2867		152.37	78.0719		142.44	17.7138		130.582	24.0507		12.1833	47.1811
				153.08	15.3779		25.5586	35.2443		130.492	26.9302		167.015	43.1266		6.16864	67.8368
				198.895	14.3104		61.1044	54.9656		127.525	38.4891		59.1667	29.1816		82.0644	60.3633
				167.745	54.0094		92.5359	67.7312		147.379	34.2263		130.049	27.0768		39.3206	5.88119
				73.0537	26.75		122.613	103.841		142.497	44.032		106.824	57.9059		45.4563	35.8792
				150.545	133.006		96.7273	50.0086		128.319	31.8333		173.504	144.432		170.571	59.3507
				105.751	129.696		99.1026	67.5464		133.57	39.786		161.335	48.9262		173.986	40.4095
				88.388	16.0631		64.1064	5.31915		150.099	71.411		163.445	44.0863		90.9352	87.1646
				199.36	25.2908		45.4709	78.7198		127.574	63.827		135.976	45.6247		199.182	35.5078
				115.7	108.89		71.2442	18.8481		113.107	13.3107		107.782	59.0147		90.664	109.636
				72.5949	136.96		49.1555	11.8546		157.997	52.3869		161.956	65.781		9.48276	18.4979
				183.825	101.426		63.5147	4.4094		113.132	25.876		154.599	19.5644		187.649	35.9275
				137.523	107.298		140.339	113.667		149.575	55.0892		154.934	25.1233		50.7843	29.6822
				72.9963	62.743		140.663	76.7454		129.345	39.2871		187.147	63.0996		200.92	25.8425
				211.78	188.45		137.517	8.02725		127.903	32.5139		100.373	101.898		80.8404	20.2083
				85.6136	177.663		29.0324	157.422		113.84	78.7925		167.447	23.1538		78.469	30.5878
				60.0151	114.218		72.9577	23.4032		99.7575	76.4679		269.142	67.2206		260.124	20.3244
				52.8444	114.037		62.7204	70.8492		149.624	26.7611		117.258	115.043		68.4188	47.118
				52.7029	14.7132		77.6387	21.3802		127.014	58.5267		168.687	76.6868		14.007	51.8915
				22.489	95.9148		160.397	94.9002		124.482	23.8104		217.154	30.839		144.659	7.34689
				87.0657	65.3054		83.7478	10.8769		148.737	14.8714		166.209	62.2831		144.2	18.0539
				85.5776	55.1766		84.8242	98.5803		137.858	60.7192		141	118.874		68.3324	51.062
				148.364	62.986		38.9674	62.0144		104.995	72.3111		162.746	55.2412		83.271	34.8011
				186.226	84.1194		62.9753	13.361		126.482	34.2869		204.475	23.8023		85.0682	37.1964
				112.049	131.676		119.904	27.7886		106.269	52.6788		175.353	137.32		172.698	31.0177
				94.8	48.569		65.8375	74.3653		198.771	17.0465		111.991	35.7433		167.649	58.7451
				76.2403	107.704		112.441	47.0623		57.03	98.4429		188.061	37.1476		93.2583	14.393
				80.1954	5.62667		49.3747	38.1667		148.986	30.5865		210.738	59.3672		75.1849	23.8732
				96.0776	19.4947		138.96	56.9612		115.874	23.0178		187.953	176.398		18.1938	44.8815
				183.741	137.863		149.541	60.3747		113.898	40.7561		189.214	147.083		111.016	38.2862
				182.02	75.3077		66.0547	157.682		90.128	62.4067		74.3212	23.536		70.1833	49.6291
				165.711	62.1562		65.0749	72.408		140.575	77.795		158.274	17.4702		8.8459	15.942
				158.378	98.1379		82.8421	40.9353		132.883	22.425		221.33	114.553		202.726	89.2327
				315.671	94.6399		144.515	7.34226		146.613	19.6904		148.239	83.2548		79.9444	36.3184
				166.307	42.2696		57.9976	14.9629		122.321	30.9777		144.904	26.8744		6.73115	25.5324
				75.9834	152.401		120.228	84.5377		135.044	19.3742		181.927	166.333		94.8529	24.3163
				158.387	166.424		64.5208	27.3543		115.155	20.41		137.151	29.4516		114.357	48.6813
				102.262	9.57221		165.488	22.349		117.092	11.7885		120.444	17.1676		67.9057	44.6361
				162.789	86.3728		167.012	41.0696		127.725	70.9333		147.325	54.6742		37.087	149.322
				137.874	75.5302		143.394	144.087		152.723	62.4856		142.486	81.2896		27.2673	24.7097
				122.41	125.58		72.5295	33.8056		124.591	15.4073		142.329	272.512		126.446	9.50826
				84.6903	79.0929		123.078	18.171		128.252	21.1007		211.15	27.7022		159.25	11.3382
				102.246	125.51		164.193	25.92		125.921	59.0667		157.393	91.7364		17.5811	31.4514
				87.2586	176.58		93.0588	25.1023		122.63	22.2847		105.359	25.01		151.793	24.0931
				116.833	92.9624		144.815	16.1154		81.7351	19.865		129.521	138.421		24.8571	44.8225
				98.4012	76.442		39.9379	87.0243		113.352	40.5801		124.066	31.1378		89.3916	44.0986
				121.78	22.1107		44.5545	22.7181		124.512	57.2938		243.947	75.4183		78.3034	6.88679
				105.287	62.4531		108.254	24.6206		106.807	69.8229		149.662	19.275		136.99	21.4889
[truncated: 9,417 more rows]
