# Supplementary material for: HIV-1 nuclear import in macrophages is regulated by CPSF6-capsid interactions at the nuclear pore complex
Source: eLife. 2019 Jan 23;8:e41800. doi: 10.7554/eLife.41800 (PMC6400501; doi:10.7554/eLife.41800)
Supplement: Figure 3—figure supplement 2—source data 2. [file elife-41800-fig3-figsupp2-data2.xlsx]

## Sheet: Fig 3 - fig supp 2
Infectivity N74D - Related to Figure 3
Figure S6A
Native conditions		% infected cells			Figure S6B		% infected cells
		2.192				Donor	DMSO	PF74
		2.333				D1	3.729	12.534
		3.851					7.849	11.18
		1.322						4.281
		1.278					6.802	1.315
		2.95				D2	0.384	1.397
		2.97					1.947	0.375
		0.166					3.1	6.166
		0.186					4.44	3.01
		3.322				D3	1.91	3.8
		1.077					4.26	5.31
		6.87						2.92
							1.5	3.05
		4.49				D4	3.68	2.48
		0.58						1.41
		0.267
		0.7796
		0.5343
		0.9821
		1.6766
		1.65
		0.7143
		2.0222
Cell death
