# Supplementary material for: HIV-1 nuclear import in macrophages is regulated by CPSF6-capsid interactions at the nuclear pore complex
Source: eLife. 2019 Jan 23;8:e41800. doi: 10.7554/eLife.41800 (PMC6400501; doi:10.7554/eLife.41800)
Supplement: Figure 4—figure supplement 1—source data 1. [file elife-41800-fig4-figsupp1-data1.xlsx]

## Sheet: Fig 4 - fig supp 1C
Mean CPSF6 signal intensities individual IN.eGFP signals 24hpi - Related to Figure 4
			Mean cytoplasm				Nuclear envelope				Nucleus
			WT		A77V		WT		A77V		WT		A77V
			NS control	shRNA	NS control	shRNA	NS control	shRNA	NS control	shRNA	NS control	shRNA	NS control	shRNA
			569.44	739	501.96	464.84	2389.13	2758.65	785.34	26.31	37960	71875.6	Not detected	4026.67
							1013.57	155.2	2180.15	356.32	27065.7	23812.4		1248.16
							295.26	322.78	1286.99	175.64	33136.6	23816
							369.84	605.3	1.02	179.38	145210	50722
							4690.91	1616.49	32.86	129.18	233430	27434.8
							3829.37	2002.94	3315.74	301.63	95576.4	55679.2
							141.28	217.34	781.47	54.72	189935	167840
							5124.56	1654.03	0.18	522.54	233383	13781.9
							2361.67	640.88	1.23	267.56	41067.7	45439.4
							527.77	3406.19	28.33	616.82	71315.6	148584
							30.75	3406.19	30.68	2989.06	21177.9	35299.6
							911.3	654.55	1.82	627.91	74186	21061.3
							445.6	654.55	1.79	208.59	28595.7
							1762.64	85.3	14.04	1407.59	45683.7
							23.72	657.12	1507.1	199.04	37384.1
							778.66	657.12	22.43	119.46	12277.1
							652.74	1906.12	1089.65	41.79	43458.6
							54	624.9	1390.71	13.83	17025.2
							107.56	2673.73	41.9	1938.93	27613.6
							7.86	340.58	2001.08	80.83	14557
							42.67	363.96	24.4	2993.81	24738.6
							1056.39	363.96	24.9	583.4	45933.3
							37.69	75.13	2485.17	402.48	29460.3
							648.99	863.9	6.25	16.06	25423.1
							2190.26	672.88	3.81	69.89	20119.1
							9.14	672.88	732.93	2088.15	19268.6
							1450.19	65.51	215.16	517.91	80198.4
							474.45	33.88	120.64	475.76	59645.1
							5401.85	33.88	0.04	72.77
							322.66	1129.65	1.71	134.82
							923.86	202.02	12.52	236.53
							19.67	202.02	1.22	14.02
							9.03	53.45	1.72	15.26
							974.15	257.52	39.81	20.69
							4578.39	440.39	0.98	79.7
							1715.83	527.8	1.35	22.07
							2731.47	3724.77	0.4	193.36
							3287.86	14.06	219.74	10.84
							1021.25	194.33	1538.17	90.87
							3838.7	68.71	70.09	18.3
							11443	424.23	977	456.07
							5673.33	2471.59	1417.9	23.69
							4206.46	1422.73	536.42	338.32
							2283.25	1348.26	232.32	727.73
							8513.29	1348.26	107.61	191.88
							967.13	1071.22	13.39	1185
							1126.33	865.95	1.57	1295.97
							9348.77	6863.72	0.41	914.37
							28.89	327.14	3015.26	128.3
							6.85	4838.36	840.52	451.77
							1.09	1462.66	0.32	617.94
							604.59	632.25	698.02	550.93
							1094.9	575.27	14.04	204.19
							896.96	153.36	196.85	111.15
							286.51	807.38	5.28	93.46
							3.2	21.17	14.73	1261.1
							3738.87	687.52	5.56	92.59
							11128.3	451.55	101.15	928.42
							9381.78	28.05	1174.45	171.05
							1295.04	444.74	413.96	298.18
							1.07	174.67	121.51	250.05
							51.75	2733.9	41.18	55.59
							68.5	63.8	18.4	1037.03
							108.56	361.33	283.66	538.8
							143.35	44.52	5.92	2054.68
							13493.3	2147.88	2963.88	1110.49
							2787.1	384.07	403.98	518.97
							940.29	479.28	431.92	274.88
							9722.85	339.54	14.04	487.16
							618.34	1158.56	23.34	10.56
							1284.02	1158.56	239.27	440.98
							1025.58	68.37	72.45	603.78
							536.22	68.37	1081.55	728.29
							5814.99	34.1	336.63	1490.21
							3134.31	75.49	294.55	723.71
							2006.5	333.5	427.7	1842.46
							238.8	137.9	1213.58	6123.17
							10542.1	410.55	11.11	81.53
							45.85	1571.94	0.06	601.63
							16032.7	1571.94	10.11	494.52
							26.66	2149.71	10.82	122.95
							6.94	103.63	7.34	292.65
							3102.01	55.35	453.48	16.48
							6872.13	340.3	380.19	2.98
							3777.59	127.83	1142.11	43.8
							1347.78	9.02	220.57	202.27
							293.64	171.64	19.23	10.48
							7446.2	4478.16	283.75	93.21
							892.39	4478.16	17.59	248.87
							552.42	382.71	45.02	215.04
							305.3	707.03	158.13	22.07
							645.59	577.98	246.08	1015.7
							435.93	905.28	7.94	340.25
							3699.94	905.28	2.76	814.95
							81.72	276.01	62.85	184.67
							369.85	250.22	4.94	277.87
							272.42	74.1	152.05	364.78
							15.6	362.1	2187.99	419.74
							0.43	425.07	609.64	593.98
							0.32	84.57	174.78	337.99
							125.75	7407.8	695.99	30.23
							397.21	311.82	0.74	296.47
							220.69	705.83	124.2	164.77
							3020.92	390.2	362.93	376.79
							2.45	46.91	4.69	1049.3
							2872.25	662.76	26.5	321.32
							1760.58	63.01	4.18	73.3
							3092.27	299.64	113.5	727.6
							2896.09	322.69	185.41	171.76
							205.62	5560.04	48.71	323.48
							5.63	40.54	7.03	106.24
							0.95	361.14	9.83	711.65
							273.48	3.96	376.64	125.44
							156.82	21.91	18.91	157.15
							751.09	1040.15	23.26	19.78
							96.06	106.89	122.27	197.33
							725.14	598.93	1175.68	391.56
							2.46	338.66	395.71	249.5
							6.79	7554.08	917.84	800.9
							226.12	74.99	485.17	209.59
							7.72	1204.11	400.61	732.13
							9.8	568.9	290.79	26.6
							1.91	1000	124.5	6.17
							0.93	752.87	409.91	663.77
							1.13	16.4	80.15	279.47
							2.66	11.5	53.63	38.69
							302.7	117.91	187.03	25.46
							13.09	63.49	71.75	319.27
							40.02	600.67	883.81	82.18
							352.19	294.94	1048.17	201.27
							6.05	3205.7	956.71	67.32
							15.96	294.2	868.6	31.45
							10.16	502.64	482.36	584.08
							196.23	872.18	1407.87	27.42
							170.69	37.98	708.3	385.74
							1609.6	325.78	398.75	183.24
							1278.2	387.25	803.67	270.17
							6759.7	5892.84	179.31	167.59
							859.65	3086.47	418.92	135.35
							78.98	41.5	54.44	478.24
							2041.78	684.94	21.36	198.88
							1263.22	2998.84	1184.7	1085.78
							3687.35	27.68	23.36	505.73
							1237.37	627.63	83.79	457.99
							7.35	61.41	237.26	1438.19
							543.69	190.38	10.27	504.36
							348.02	618.06	534.4	1097.86
							227.15	797.17	23.59	106.7
							279.87	793.92	881.23	656.37
							406.48	464.33	39.84	87.43
							279.75	14.44	11.51	178.58
							424.38	326.05	51.38	56.1
							2164.04	426.51	138.94	227.84
							679.15	43.21	168.07	100.92
							193.17	653.82	31.98	27.36
							108.47	494.51	245.8	147.55
							1.86	201.43	14.43	69.88
							148.1	268.8	6.18	182.85
							5.27	2470.4	273.51	594.06
							2.46	25.12	1953.92	461.04
							30.39	4943.08	57.66	318.61
							18441.9	58.89	36.84	1170.23
							2.71	356.43	394.54	188.71
							12.16	817.08	9.83	303.16
							28.09	638.56	14.72	306.35
							5.22	1073.26	4.88	1578.04
							13.44	1073.26	148.8	336.01
							331.19	12.41	77.24	44.92
							254.3	1171.55	300.78	759.96
							11.09	149.13	198.02	171.87
							25.12	245.8	5.33	289.58
							7.8	268.52	34.81	636.67
							94.82	268.52	91.96	210.13
							510.99	61.38	22.42	135.93
							282.41	29.04	6.26	104.6
							2.96	253.35	6.32	107.83
							449.28	52.61	7.6	45.86
							3.05	97.5	8.83	730.37
							860.17	88.11	5.82	369.37
							2974.85	25.43	118.97	180.61
							872.63	600.97	204.73	189.78
							2729.41	521.29	5.15	35.16
							432.32	348.38	141.37	1246.62
								360.6	97.73	271.6
								139.27	120.1	68.38
								98.7	26.6	18.57
								13494.6	70.01	171.76
								49.12	6.15	48.54
								20.33	44.76	22.9
								16.44	9.66	22.18
								251.38	4.97	431.49
								1015.2	104.51	570.45
								151.89	49.69	720.36
								564.19	5.59	154.5
								17156.7	8.71	174.98
								17156.7	17.7	219.64
								239.94	175.85	648.61
								239.94	41.43	70.14
								22.94	96.7	371.52
								49.65	3.51	2508.65
								291.66	58.85	941.36
								248.1	85.42	25.63
								331.59	55.47	61.86
								137.65	47.53	1040.19
								797.2	108.21	748.63
								44.61	26.25	62.5
								7856.07	10.02	96.97
								51.63	4.17	25.25
								51.39	247.54	63.11
								5037.71	47.02	124.48
								91.95	45.32	1079.83
								91.95	3.33	138.38
								33.21	101.42	398.86
								245.47	215.2	254.54
								838.33	310.75	349.11
								123.04	3.52	101.44
								135.94	23.31	119.54
								49.32	48.34	452.19
								686.63	25.22	208.48
								179.09	65.72
								88.94	5.95
								456.11	291.34
								29.21	91.03
								331.58	15.48
								64.11	22.56
								294.46	15.91
								263.38	12.56
								183.73	1016.58
								331.13	125.35
								346.19	6.41
								199.81	15.32
								64.16	60.09
								197.3	10.83
								273.5	164.04
								539.88	30.04
								98.19	239.31
								419.1	11.62
								419.82	13.51
								26.33	106.46
								18.99	103.33
								852.47	83.77
								224.41	133.33
								282.4	836.33
								282.18	12.4
								25.31	162.65
								102.17	217.91
								701.34	174.1
								472.86	33.09
								12.41	52.71
								307.24	269.7
								65.15	480.04
								134.16	28.53
								81.56	345.11
								266.15	391.38
								237.34	393.66
								117.58	1176.72
								21.95	150.45
								21.95	918.72
								253.73	1193.1
								86.69	638.24
								26.76	2071.86
								123.55	2777.34
								279.74	1594.41
								2133.89	169.46
								2191.14	10.01
								155.37	837.36
								242.82	157.61
								125.92	121.86
								114.61	81.13
								90.27	7.75
								408.15	120.58
								109.21	418.13
								46.84	0.91
								32.09	49.43
								5051.75	3570.16
								149.21	1754.77
								84.83	159.16
								1072.26	1.09
								86.47	182.37
								505.53	22.2
								282.83	1932.81
								349.7	2776.65
								92.3	7161.51
								1352.65	408.83
								157.81	1291.06
								337.87	188.42
								281.9	1010.03
								57.19	41.27
								287.94	1.59
								345.86	1411.24
								11.82	6786.21
								354.37	4252.37
								42.44	213.28
								450.52	17.96
								227.85	2166.26
								195.66	14.55
								84.59	118.84
								84.59	101.33
								318.33	13.62
								22.15	296.48
								352.32	1365.73
								23.21	1004.94
								251.7	27.32
								195.07	527.55
								451.6	25.37
								43.81	3.59
								108.21	94.43
								366.83	427.53
								191.4	48.8
								730.42	2144.41
								9.22	9.84
								60.3	5.11
								9.24	100.76
								32.26	5.46
								327.43	137
								1043.65	115.44
								126.53	5.59
								194.86	9.13
								49.95	8.93
								115.13	405.85
								123.66	41.19
								26.7	640.13
								123.99	841.6
								11.23	129.09
								11.23	44.55
								321.54	304.31
								364.6	426.79
								619.05	739.28
								102.51	710.37
								73.84	1234.82
								222.37	33.87
								285.78	39.69
								443.07	819.34
								188.3	284.48
								1122.86	163.43
								286.21	712.9
								286.21	260.91
								53.17	20.74
								461.67	8.41
								461.67	92.27
								1359.8	11.14
								598.33	71.77
								311.02	0.84
								57.11	1.23
								66.53	1.48
								18.47	23.17
								88.88	0.71
								1825.49	462.16
								81.83	12.76
								376.82	34.66
								336.62	16.14
								65.5	54.87
								468.91	192.12
								3.41	1284.33
								76.27	277.14
								88.8	189.43
								288.33	0.61
								169.53	1.26
								298.2	5.26
								101.76	73.91
								88.85	916.53
								252.76	203.09
								83.32	995.63
								228.45	509.2
								191.41	540.36
								410.22	160.03
								205.19	2434.83
								50.94
								112.4
								12.2
								51.38
								76.68
								304.79
								55.03
								22.98
								21.7
								95.64
								2147.77
								276.04
								165.25
								224.43
								307.1
								79.59
								27.82
								195.98
								26.54
								146.54
								251.54
								3.36
								422.46
								334.9
								98.6
								2849.22
								27765.4
								53.35
								651.51
								22.57
								22.57
								251.72
								14.88
								328.88
								12.1
								197.04
								135.88
								122.97
								49.25
								161.25
								100.55
								218.46
								111.69
								29.66
								72.29
								10.75
								409.44
								73.62
								212.5
								34.94
								524.61
								31.73
								6
								141.8
								147.23
								182.91
								220.48
								172.28
								86
								187.51
								292.61
								2805.37
								207.94
								68.24
								131.4
								289.78
								45.7
								9.05
								9286.21
								66.56
								127.82
								137.22
								372.8
								639.46
								504.01
								34.86
								148.29
								34.49
								124.27
								1952.88
								132.42
								83.59
								145.16
								11.34
								156.31
								6.25
								257.92
								212.06
								212.06
								124.16
								30.78
								196.65
								8919.59
								2929.96
								11.57
								45.64
								7338.43
								451.67
								86.68
								269.93
								931.51
								393.34
								1916.43
								176.99
								34.13
								91.24
								8.21
								411.03
								6853.57
								6853.57
								78.26
								520.97
								348.1
								212.47
								96.55
								7743.13
								49.13
								385.44
								56.57
								109.41
								41.4
								1287.82
								204.48
								80.64
								12.12
								110.99
								9.91
								110.68
								604.53
								86.17
								1296.48
								99.45
								121.54
								26.01
								20.21
								92.9
								473.89
								1971.04
								284.5
								310.03
								310.03
								22.27
								43.2
								7641.15
								217.18
								57.76
								12.12
								12.12
								3915.4
								31.27
								102.27
								46.09
								326.75
								17.62
								14.64
								20.2
								530.35
								530.35
								149.67
								170.38
								298.7
								4363.21
								118.26
								289.54
								231.15
								57.92
								272.89
								2760.15
								642.39
								210.07
								384.19
								209.44
								264.94
								229.96
								13116
								99.06
								241.29
								132.4
								141.01
								11653.1
								4487.73
								25.25
								94.49
								12.23
								668.96
								59.96
								43.74
								6964.15
								21354.9
								422.78
								422.78
								41.64
								3382.52
								259.01
								3167.13
								13194.3
								986.07
								8596.11
								9263.87
								28.65
								71.09
								79.73
								115.74
								179.83
								6912.53
								188.18
								4375.28
								3664.28
								3664.28
								64.66
								7773.07
								184.33
								700.88
								69.08
								61.21
								2285.34
								82.28
								6265.18
								432.87
								7777.65
								15.04
								71.9
								69.76
								7090.62
								6376.95
								1482.75
								9515.46
								8332.51
								17.07
								122.54
								94.47
