# Supplementary material for: HIV-1 nuclear import in macrophages is regulated by CPSF6-capsid interactions at the nuclear pore complex
Source: eLife. 2019 Jan 23;8:e41800. doi: 10.7554/eLife.41800 (PMC6400501; doi:10.7554/eLife.41800)
Supplement: Source data 1. — Correlation between CPSF6 knock-down efficiency and HIV-1 infectivity. Spearman correlation of CPSF6 knock-down efficiency and K/D:NS infectivity ratio from multiple donors. [file elife-41800-data1.xlsx]

## Sheet: Donor 1
Well 1			Well 2			Well 3			Infected cells
CPSF6	CA		CPSF6	CA		CPSF6	CA		Non infected cells
9.19331	2.89359		80.9788	12.5874		3.51587	3.45205
8.6	23.0792		31.8601	14.5276		132.253	16.0369			CPSF6 mean	Mean infectivity
45.6491	24.2996		64.5103	15.755		22.574	16.7387		NS control	142.165	8.4933
76.8951	26.0496		34.3127	21.2352		40.5213	21.372
51.4709	26.2405		36.2181	23.0843		25.4122	21.9714
111.017	27.3587		42.7975	23.1094		51.4477	22.4807		K/D
87.1683	28.1001		125.788	23.6282		12.5621	22.8455		Well	Mean CPSF6	CPSF6 left	k/d efficiency (%)	Infectivity (%)	KD:NS infectivity
102.335	28.5048		44.1404	24.5503		33.7005	23.396		1	77.7942	54.7846	45.2154	3.62	0.426218
86.1765	28.8252		37.4883	25.0621		62.3715	24.1534		2	77.37	54.4859	45.5141	3.859	0.454358
65.8635	31.0628		71.2004	25.3655		98.3517	24.5678		3	74.0617	52.1561	47.8439	0.21	0.0247254
35.2667	31.0812		92.3964	26.0806		20.6467	24.7082
80.3923	31.4083		31.9834	26.4345		37.3599	25.2824
153.016	31.5995		93.1292	26.7316		36.6878	25.4715
71.9789	31.7686		68.72	26.7396		107.435	26.0358
82.8145	31.775		106.655	27.0352		82.9549	26.4049
108.152	31.9259		20.0026	27.0606		115.492	26.4511
38.716	31.9604		93.2	27.0849		58.2507	26.5596
31.003	32.1354		131.136	27.2369		73.2941	26.5692
59.4419	32.2108		131.547	27.25		41.0095	27.2054
40.9368	32.3238		104.397	27.2658		35.2612	27.333
97.689	32.6826		18.7767	27.3603		92.833	27.4263
99.6623	32.7912		71.4267	27.4097		89.189	27.6906
133.334	32.9694		86.162	27.6991		122.488	27.7116
111.429	33.1148		129.983	27.7381		101.809	27.804
64.9971	33.4551		125.217	27.8318		90.0732	28.0453
48.6853	34.135		25.3476	27.8346		89.5322	28.0816
9.5995	34.4033		103.526	27.8835		81.4485	28.1177
17.9458	34.8638		82.9896	27.8875		12.0341	28.2541
132.739	34.8837		77.5389	28.1387		115.509	28.4225
161.673	35.0003		101.123	28.3197		53.0094	28.4745
133.511	35.1569		101.263	28.6556		99.7045	28.6792
78.7808	35.4091		146.461	28.8633		18.2381	28.712
101.721	35.535		89.9168	28.9197		116.987	28.9033
67.0373	35.7891		140.172	29.0355		64.1154	28.906
118.152	35.9464		84.4146	29.0871		145.985	28.9541
136.065	36.2449		90.1121	29.1155		41.6814	28.9885
177.618	36.5179		130.429	29.1254		134.927	29.0997
144.677	36.6529		90.2222	29.1625		115.023	29.141
97.7229	36.6687		94.7762	29.1924		110.611	29.2235
114.72	36.7557		114.583	29.4406		74.9227	29.278
102.591	37.0326		91.9273	29.4483		68.2673	29.3157
113.155	37.1555		110.225	29.6193		170.014	29.4259
141.874	37.2773		107.7	29.6237		130.072	29.4695
60.689	37.4629		78.1016	29.7668		105.834	29.5503
133.561	37.6799		90.3609	29.9504		73.9586	29.5875
107.613	38.1614		118.362	30.0039		104.619	29.5923
120.442	38.7038		36.2095	30.1749		121.581	29.8542
66.7111	38.727		98.4304	30.2649		180.795	29.952
75.0353	38.7699		106.282	30.3284		93.9079	30.0412
100.179	38.9165		41.9177	30.3777		29.9714	30.0628
7.76768	39.1224		33.2057	30.8004		126.862	30.2453
8.46703	39.1539		88.0777	30.8943		39.91	30.3696
39.2673	39.2024		82.5995	30.9323		41.7713	30.3735
26.3505	39.3042		92.0871	30.9652		8.84541	30.4056
114.907	39.8789		146.765	31.1617		91.2294	30.4402
104.765	40.0698		73.4595	31.2408		71.7204	30.4588
129.81	40.2019		92.2779	31.4033		31.1096	30.4797
137.304	40.2035		58.686	31.4201		97.2454	30.5492
54.1763	40.2982		49.4545	31.5893		95.2667	30.5963
152.561	40.6037		140.851	31.6012		32.7085	30.7854
125	40.8137		128.672	31.6159		107.255	30.8161
31.6779	40.8251		80.1328	31.6795		23.1134	30.8272
112.486	41.1721		90.7426	31.7239		129.448	30.9302
170.049	41.3187		64.31	31.9035		24.3481	31.1868
34.5144	41.3293		26.2773	32.2588		11.7	31.2976
74.4797	41.3482		150.316	32.2645		83.1831	31.3262
116.165	41.8535		116.953	32.5595		74.5701	31.3571
19.7166	42.0689		150.992	32.6898		106.348	31.4505
77.252	42.2274		30.6594	32.698		94.5455	31.4674
31.2727	42.3243		130.398	32.7023		114.111	31.5168
133.623	42.3511		103.206	32.7856		124.074	31.6542
102.527	42.9413		70.7401	32.7931		71.7586	31.7308
109.961	43.2028		90.9735	32.9721		38.3636	31.7883
116.521	43.3217		134.494	33.0237		7.48842	31.8471
82.7869	43.4908		66.5013	33.0369		108.087	31.8875
26.1729	43.583		159.852	33.1062		134.755	31.9511
117.354	43.7826		38.6408	33.3019		123.475	32.1171
147.739	44.2992		65.6586	33.4855		96.196	32.1681
18.6055	44.3363		103.563	33.6818		96.5962	32.2245
103.329	44.3788		23.7906	33.6821		58.5714	32.282
125.29	44.4202		142.476	33.7698		14.1385	32.304
42.7537	44.4563		53.9574	33.7891		105.857	32.4144
125.736	44.5519		101.951	33.8531		36.6023	32.4345
86.3199	44.6048		116.068	33.8593		97.8535	32.5224
34.8248	44.6848		78.0205	34.0166		148.733	32.6432
10.0759	44.6869		187.669	34.0434		62.063	33.0065
21.8468	45.0425		9.71854	34.0533		17.2261	33.0288
32.6279	45.768		128.19	34.1034		23.2595	33.0367
123.36	45.9934		32.7738	34.2094		80.7112	33.1498
147.512	46.0261		39.2068	34.3878		107.149	33.1711
97.4077	46.0952		78.1742	34.4333		150.67	33.2494
12.4759	46.2118		115.105	34.4531		23.3231	33.3638
105.879	46.3244		29.2696	34.5824		65.0028	33.3826
30.847	46.4314		115.91	34.6763		142.578	33.3846
110.913	46.5863		6.73941	34.8036		92.9772	33.419
118.549	46.7266		118.205	34.8539		123.469	33.4245
61.2154	46.73		159.66	34.8554		98.0619	33.4261
156.118	46.8062		122.59	34.8588		79.4245	33.496
69.0411	46.8743		155.97	34.9286		145.899	33.5286
120.97	47.0451		15.211	35.093		61.9745	33.5811
100.011	47.072		103.561	35.1353		9.26205	33.6555
20.945	47.2239		63.2225	35.1998		56.0139	33.6846
69.9805	47.3211		95.0864	35.2997		52.2877	33.7989
15.4511	47.365		109.036	35.4582		95.0143	33.8489
132.511	48.2686		54.1483	35.5369		70.1703	33.8787
54.7891	48.46		8.03226	35.5874		131.587	34.0189
19.052	48.723		57.674	35.6611		31.5973	34.0553
107.129	49.0745		126.576	36.0667		112.654	34.0639
17.1622	49.4433		126.487	36.0699		89.2462	34.0692
45.8746	49.604		63.8892	36.1024		86.5726	34.1105
32.4418	49.9018		67.0649	36.3149		127.492	34.1151
79.9399	50.0891		103.746	36.3156		22.6547	34.1649
108.218	50.1716		124.585	36.3707		79.2804	34.1886
13.5098	50.1773		97.9907	36.3796		25.4392	34.2503
180.487	50.1794		18.8417	36.4085		19.4942	34.2956
55.1053	50.3326		48.9227	36.4288		51.3762	34.4153
104.935	50.646		64.6111	36.4748		144.952	34.4748
22.934	50.6911		88.9407	36.4912		101.635	34.5794
128.577	51.0303		9.91829	36.5219		38.1909	34.5971
33.0164	51.5522		32.0755	36.8502		13.7304	34.6003
17.9689	51.9226		17.9606	36.9904		84.1612	34.6229
67.6674	52.043		110.615	37.0331		154.409	34.6249
128.819	52.1419		119.9	37.1616		104.479	34.6674
172.236	52.1805		97.8364	37.1747		49.9556	34.8385
30.0879	52.2292		111.875	37.2791		14.2594	34.8671
62.6958	52.7214		107.757	37.2811		74.7663	34.8696
113.176	52.7386		176.524	37.3008		32.2819	34.8907
16.1866	53.3035		58.7225	37.3075		119.147	34.9989
13.1375	53.4893		101.398	37.4727		69.9553	35.154
17.4985	53.562		10.4551	37.5654		81.4029	35.1609
14.1032	53.7108		129.541	37.5934		137.637	35.2964
45.3396	54.2583		83.4397	37.6233		25.8141	35.3347
30.9943	54.6215		96.2493	37.6371		69.9885	35.368
124.472	54.7083		99.5478	37.9792		64.4877	35.3682
104.133	54.7452		78.4057	38.0442		28.7909	35.3819
115.219	54.8102		32.7175	38.0798		72.3223	35.4684
40.8258	55.4946		10.3107	38.1053		71.3313	35.4707
136.784	56.1084		150.423	38.2995		98.5649	35.4928
102.072	56.2833		137	38.5527		180.776	35.5344
71.4535	56.7351		121.26	38.6273		123.519	35.7517
85.7623	56.763		109.722	38.6706		98.7051	35.8666
112.262	56.8102		105.189	38.7662		40.5068	35.89
12.2919	56.9379		73.4162	38.997		76.9393	36.0439
146.829	57.0263		29.7346	39.0383		13.5944	36.0988
94.7989	57.1764		71.9113	39.1288		86.8295	36.1528
49.6645	57.6756		31.0909	39.3581		39.1166	36.1641
134.163	58.0607		103.227	39.404		124.027	36.3145
128.539	59.546		34.3846	39.4555		132.754	36.4411
55.9179	60.1223		59.9522	39.5687		144.039	36.4777
51.4046	60.5712		52.5245	39.6469		59.9811	36.5033
173.07	60.8348		140.324	39.6563		94.0453	36.521
27.7816	61.2736		57.0795	39.6601		22.7444	36.5984
135.95	61.7955		96.2351	39.6969		182.974	36.6059
120.734	62.4146		85.8597	39.9131		58.8421	36.611
19.2646	62.5656		64.5542	40.151		132.203	36.6373
51.3363	62.752		141.318	40.2183		106.398	36.7538
31.7934	62.7732		80.9513	40.2648		29.9942	36.8666
62.3639	62.9506		20.1367	40.3096		97.1371	36.9038
84.3797	63.8212		114.245	40.3231		77.3913	37.1354
95.7354	63.9896		64.3648	40.3554		88.7239	37.2138
37.5336	64.6668		116.095	40.3595		11.5985	37.3856
133.848	64.9694		130.683	40.3759		123.988	37.4369
88.7636	65.1536		46.0577	40.4532		109.995	37.7238
73.5506	65.2076		35.3932	40.4641		163.292	37.8136
103.247	65.3885		22.8634	40.5031		96.5583	37.8575
54.6196	65.7712		135.485	40.5741		31.788	37.8906
12.3204	66.7157		96.9925	40.5959		27.0813	37.9332
30.6244	66.8507		75.1146	40.6095		154.531	37.9446
85.1028	67.3236		96.0086	40.7202		14.9849	38.3342
132.291	68.075		128.653	40.7917		12.7305	38.3468
80.2414	68.1857		103.059	40.8319		68.9682	38.4486
110.421	68.3119		120.329	40.8681		144.833	38.6712
17.1518	68.7624		176.905	40.9034		58.7098	38.6831
99.3912	71.3598		99.8798	40.9476		123.534	38.7083
54.7495	71.8381		116.057	40.9501		126.304	38.7094
91.0798	72.6585		65.3233	41.0459		126.493	38.7388
14.5802	73.0517		148.397	41.0832		132.681	38.7842
63.8346	73.9681		101.9	41.1631		14.8313	38.7909
99.2987	74.3012		26.4702	41.1732		145.588	38.8013
184.621	75.5198		18.2709	41.2215		106.048	38.8471
39.9971	75.7825		147.135	41.2343		110.361	38.9063
35.2151	75.9302		10.5047	41.3397		74.7358	39.012
41.7029	77.1087		13.6217	41.3829		32.8263	39.324
91.2566	77.3492		54.0856	41.3951		51.5111	39.3452
51.8387	77.6597		66.0199	41.4521		148.867	39.3601
70.9187	80.402		129.376	41.4797		115.27	39.3763
20.1827	80.8843		152.049	41.8663		38.6349	39.422
28.281	83.9157		21.173	41.88		90.6431	39.4265
84.7049	84.7002		98.8134	41.9325		75.747	39.459
62.7829	85.219		127.599	41.9704		86.4352	39.4638
122.425	86.9865		129.652	41.9943		64.2118	39.4979
94.037	88.9976		59.3984	42.0154		94.7991	39.524
17.3974	91.4956		14.2776	42.0275		17.1168	39.5657
13.9471	92.5524		55.9143	42.0727		166.983	39.6246
30.3386	93.9871		94.6435	42.2241		120.015	39.6444
19.9945	97.1344		16.2163	42.3084		40.6577	39.7531
111.515	99.2564		77.6452	42.3165		18.935	39.8022
82.4613	100.165		99.7786	42.4343		131.586	40.0038
114.572	100.807		129.015	42.4959		8.95297	40.0614
54.6233	102.389		43.4124	42.7848		109.545	40.1362
119.63	104.208		116.133	42.8843		74.3991	40.1463
40.3586	105.488		122.347	42.8861		13.429	40.1556
13.5762	105.605		73.6514	42.9659		109.51	40.3007
16.2589	109.74		121.406	43.0845		99.7967	40.3712
109.232	110.765		73.8278	43.1335		19.7645	40.4149
41.1092	111.199		9.23977	43.2048		30.2279	40.4258
26.5593	112.416		62.5942	43.2524		15.1918	40.7296
124.132	115.818		44.0742	43.3258		49.4252	40.7356
134.852	138.722		43.7705	43.3474		118.368	40.8122
152.851	139.362		66.4556	43.3868		7.25648	40.8425
64.9696	139.75		119.535	43.4212		173.092	40.9832
19.5588	142.939		107.214	43.4322		57.9521	41.1582
20.614	151.398		60.0219	43.4702		82.067	41.209
32.8214	151.496		44.0449	43.4768		24.6167	41.2588
149.076	157.765		114.614	43.5091		123.697	41.5187
42.787	159.021		44.9561	43.6393		107.215	41.537
114.075	164.485		148.49	43.8182		90.3184	41.539
69.8266	165.034		24.9977	43.8216		123.79	41.6368
23.5088	192.83		146.736	43.8415		9.73415	41.8064
26.4194	246.688		72.9752	43.8629		105.288	42.0239
			36.9788	43.9081		89.5297	42.2761
			108.644	43.9258		25.9829	42.3395
			85.307	43.9447		20.4466	42.3682
			111.166	43.9762		75.822	42.3694
			171.227	44.0033		142.376	42.5046
			90.104	44.069		32.7721	42.5813
			75.926	44.1946		29.722	42.7921
			80.3697	44.314		7.27586	42.8471
			26.2696	44.3822		116.534	42.8693
			53.891	44.4212		73.0381	43.1043
			131.697	44.4312		31.5748	43.156
			92.1426	44.5698		65.6708	43.2121
			24.9125	44.5863		112.509	43.3624
			134.636	44.5873		22.7604	43.381
			57.1077	44.6057		57.1728	43.3872
			76.1534	44.7176		24.4771	43.3907
			125.905	44.7785		85.5607	43.3907
			128.876	44.7897		37.3148	43.4169
			169.76	44.8217		139.454	43.4479
			30.1711	45.0469		85.4962	43.54
			108.059	45.0884		33.3898	43.6162
			110.738	45.2347		66.6187	43.7941
			129.329	45.3161		31.6243	43.9532
			34.7338	45.4578		79.6713	44.0157
			88.0385	45.5368		114.052	44.3901
			144.037	45.5696		109.92	44.5824
			86.1636	45.6714		102.54	44.6725
			16.7283	45.7221		90.6701	44.6833
			94.0497	45.7278		40.9527	44.6846
			28.9565	45.8809		28.5954	44.9315
			122.269	45.9088		99.8338	44.9364
			112.791	46.1371		23.2487	44.9929
			18.4665	46.3156		28.3597	45.0321
			13.9712	46.3308		14.9032	45.1019
			77.1399	46.4134		103.384	45.2177
			99.8457	46.4696		82.5318	45.4133
			106.94	46.4791		45.6616	45.4767
			21.4613	46.5844		28.4495	45.5179
			92.0935	46.5926		93.0057	45.6144
			52.2902	46.6628		69.6837	45.6278
			32.0846	46.7258		161.997	45.6293
			124.033	46.8749		70.3954	45.6727
			113.292	46.9381		128.314	46.3065
			127.209	46.943		158.424	46.3151
			112.935	46.9995		19.3726	46.6078
			90.0556	47.0124		70.3372	46.6346
			120.919	47.1092		10.1538	46.6697
			96.8278	47.3411		113.373	46.7999
			14.5477	47.368		70.6203	46.8372
			23.17	47.5015		80.4406	46.8869
			13.0706	47.5626		129.765	46.9658
			141.458	47.862		31.409	47.0312
			86.0358	47.9157		94.9867	47.1714
			153.151	47.9489		131.532	47.3591
			98.35	48.3821		113.403	47.4175
			31.8032	48.483		31.6809	47.4575
			40.6814	48.7368		31.131	47.491
			132.569	48.833		16.1224	47.5246
			54.9944	48.9063		90.365	47.5368
			19.4843	48.9212		125.155	47.6665
			102.146	49.124		175.977	47.7823
			171.25	49.1479		135.266	48.0209
			111.17	49.1878		111.733	48.0372
			27.5106	49.2775		57.8684	48.0744
			15.7284	49.2971		50.4449	48.1347
			70.9469	49.4742		30.781	48.2592
			61.3369	49.6498		20.5565	48.328
			50.581	50.0386		28.2356	48.5761
			9.87579	50.0763		92.4129	48.6048
			98.5182	50.1126		106.224	48.7423
			15.7014	50.15		116.339	48.847
			117.165	50.1612		95.5382	49.0065
			113.44	50.1661		138.486	49.0097
			59.9707	50.2473		11.4927	49.1339
			142.448	50.2739		142.23	49.3543
			60.8519	50.3215		70.5634	49.4561
			178.775	50.3504		45.7664	49.4703
			127.952	50.455		51.1757	49.5099
			137.446	50.5684		81.7869	49.5586
			108.406	50.6304		105.533	49.7334
			65.885	50.8511		31.5425	49.745
			34.2659	50.9252		101.603	49.8163
			21.6017	51.0649		97.4136	49.8455
			119.855	51.1168		71.7378	49.9743
			144.436	51.1682		43.154	50.0025
			137.552	51.1744		42.5905	50.1174
			156.997	51.2373		145.497	50.2471
			25.634	51.3303		136.595	50.3496
			111.702	51.3304		92.9766	50.358
			167.016	51.3859		27.2399	50.3974
			100.265	51.4139		148.385	50.7423
			140.832	51.562		27.0098	50.9664
			83.5788	51.5674		52.6207	51.0852
			20.8878	51.7132		70.0496	51.1151
			93.538	51.7234		63.5541	51.3315
			116.462	51.8165		57.5885	51.395
			91.7778	51.9545		147.297	51.5045
			155.428	52.0083		52.4943	51.5705
			8.09665	52.011		55.3601	51.7159
			14.5552	52.0418		20.2911	51.7286
			46.6208	52.383		103.176	51.7969
			20.6247	52.4262		121.651	51.8719
			162.494	52.827		92.1278	51.9318
			87.2459	53.0339		105.176	51.9558
			189.01	53.4623		94.1456	52.0221
			23.4269	53.5123		12.1538	52.1204
			37.7086	53.5134		15.4387	52.1385
			9.97491	53.5236		106.342	52.267
			60.9564	53.5961		35.1263	52.319
			112.591	53.6918		28.2388	52.3224
			44.2622	53.8444		179.702	52.7155
			133.912	53.9196		83.5791	52.8371
			37.0373	53.9215		118.714	53.2696
			79.4399	54.1666		97.2975	53.3559
			38.6759	54.2905		53.6063	53.3646
			68.1432	54.3627		96.0327	53.4884
			15.2945	54.4851		95.1068	53.8834
			92.7703	54.7142		86.95	54.27
			19.8106	54.8718		12.4268	54.3025
			92.8871	54.9114		15.095	54.3238
			128.396	54.9869		202.1	54.421
			88.352	54.9876		21.8276	54.4397
			155.971	55.2484		43.339	54.449
			130.814	55.467		58.7452	54.679
			25.0097	55.525		31.9288	54.6877
			20.1289	55.5395		142.563	54.7169
			12.2049	55.7061		26.1061	54.8796
			46.2929	56.0079		22.85	55.2013
			110.106	56.0464		68.0115	55.5542
			25.8765	56.0792		121.786	56.0787
			76.7454	56.181		42.9692	56.1165
			117.397	56.3705		89.7175	56.1595
			139.386	56.3896		30.0936	56.3165
			37.25	56.7991		100.077	56.599
			160.789	56.8227		135.225	56.6001
			119.531	57.0135		127.783	57.1186
			78.9662	57.1894		45.9347	57.2597
			78.8989	57.5685		8.12418	57.3166
			71.0024	57.6859		35.3868	57.3177
			106.279	57.7041		112.547	57.4584
			48.7631	57.7316		25.0794	57.5402
			98.3872	57.7832		55.4605	57.8263
			100.088	57.7972		39.8393	57.8601
			121.871	57.8665		204.182	58.0421
			13.3855	57.9393		41.3068	58.3097
			41.7281	57.9856		27.0897	58.3302
			44.9405	58.5747		132.755	58.6546
			119.802	58.5901		27.8893	58.7084
			65.2284	58.7152		100.578	58.7733
			35.0177	59.0801		12.629	59.2996
			52.4021	59.1413		66.468	59.3469
			14.4939	59.1948		68.1555	59.9852
			93.2813	59.4619		88.1208	60.0194
			151.798	59.6366		16.6962	60.1465
			22.5331	59.6771		141.99	60.5455
			120.441	59.8832		59.7287	60.5897
			28.0867	60.0075		28.6727	60.6627
			93.1628	60.0408		38.2085	60.674
			25.4757	60.1709		34.0546	60.6988
			28.5958	60.1785		27.4518	60.7135
			31.8019	60.3605		112.649	60.7604
			71.4794	60.6396		75.5422	60.8664
			20.3973	60.6928		117.094	60.8862
			63.0895	60.7358		23.6325	61.0222
			102.368	60.8405		12.8788	61.0438
			22.9268	61.0189		117.264	61.2148
			13.1342	61.0687		140.572	61.5372
			180.559	61.0837		22.0599	61.5435
			15.5759	61.1163		57.2962	61.6609
			74.41	61.1593		124.586	61.7973
			26.6713	61.2831		63.3047	61.8698
			27.0348	61.6447		115.038	62.2075
			96.7262	61.6894		83.5526	62.2289
			21.2932	61.7704		92.6843	62.2459
			21.8902	61.7959		3.99278	62.5623
			87.928	62.1401		46.2274	62.6402
			69.5638	62.1651		119.13	62.9458
			85.386	62.2933		37.7901	62.9836
			23.6124	62.6428		134.838	63.1022
			59.9114	62.6735		25.713	63.141
			42.8479	62.6765		26.9072	63.2284
			7.41667	62.7594		68.4452	63.5706
			11.0584	62.7659		40.306	63.6678
			19.0291	62.879		39.134	63.67
			105.422	62.9272		103.882	63.9597
			123.199	63.0177		27.6914	64.5252
			13.6272	63.4398		99.958	65.1954
			27.2005	63.4512		104.489	65.2601
			75.9327	63.4528		100.543	65.4538
			21.8312	63.6045		141.532	65.6658
			10.5625	63.6526		34.4145	65.7417
			93.3153	63.6771		26.8028	65.9635
			92.1571	63.8579		84.6205	66.1306
			103.418	64.1812		11.5044	66.4834
			16.6829	64.2776		17.3591	66.6859
			83.5947	64.3337		36.3855	66.8848
			35.0983	64.4378		19.2599	67.4483
			21.5156	64.454		102.571	67.5837
			100.504	64.5183		152.039	67.9015
			110.057	64.9679		82.9894	68.1485
			111.478	65.1635		19.9781	68.7259
			43.4488	65.5313		68.6476	68.9197
			118.138	65.6153		123.603	69.1351
			93.5981	65.8493		102.467	69.315
			11.6225	66.2917		8.47015	69.4586
			172.709	66.6678		75.844	69.739
			26.8768	66.8774		190.79	69.9444
			18.6271	66.9362		20.3255	70.0143
			76.9034	67.4613		14.1211	70.0298
			39.2149	67.8317		17.344	70.6121
			111.285	67.8469		190.578	71.4483
			67.2839	67.9484		111.32	72
			10.4317	67.9708		18.7714	72.0362
			21.0406	68.2599		106.825	72.1002
			59.7907	68.3449		21.5398	72.2001
			137.735	68.5694		137.235	72.2059
			120.247	68.7076		15.25	72.3716
			56.3477	68.9567		77.1224	72.5473
			153.018	69.1971		88.763	72.6291
			50.5018	69.5707		19.3866	74.0134
			79.9643	69.6397		18.5982	74.0544
			108.937	69.697		15.5337	74.7038
			67.3341	69.8049		16.0322	74.8554
			28.8104	69.9608		49.8072	75.2982
			110.702	70.118		30.2651	75.546
			32.1721	70.1185		97.8259	76.3038
			32.2009	70.339		14.0341	76.5358
			129.582	70.483		39.4248	76.6705
			148.399	70.7531		12.6667	77.2935
			125.376	70.8369		30.756	77.8219
			150.705	70.8851		28.7856	78.2438
			134.587	70.9184		97.0612	78.2488
			131.852	70.9208		85.2203	79.0112
			53.217	71.0547		57.4064	79.505
			53.2656	71.1281		55.6735	81.7834
			103.36	71.2667		67.8095	82.2118
			20.7671	71.3682		28.5215	83.3642
			90.2752	71.5668		20.3601	84.3732
			18.6646	71.7392		92.0031	84.6721
			105.791	71.7622		83.2773	85.9118
			33.8747	71.7671		44.7438	88.1626
			13.7527	72.3881		20.3501	88.2741
			163.122	72.6482		74.9531	89.1906
			122.75	73.5495		141.371	90.4035
			37.1008	74.0326		26.7862	91.5009
			74.9059	74.2673		84.8863	92.2932
			115.637	74.4915		18.1205	94.6794
			109.744	74.5886		51.177	94.8943
			51.3294	74.6858		78.3459	97.0249
			155.966	74.9892		145.643	97.2337
			102.889	75.1074		17.7241	99.4164
			26.6881	75.3833		11.8142	101.431
			51.3844	75.6441		21.5337	101.694
			45.8045	75.8759		112.03	118.215
			129.27	75.9655		30.1522	171.312
			124.585	76.3303
			54.1741	76.3896
			81.7984	76.5987
			83.2083	76.746
			18.6182	76.7682
			151.684	76.9935
			39.6077	77.5524
			16.351	77.7141
			26.9189	77.8972
			116.588	77.9016
			35.3443	77.9559
			19.2721	78.3568
			10.739	78.6752
			143.804	78.7579
			61.4402	78.9508
			36.0548	79.0196
			59.4779	79.0293
			12.2827	79.4671
			41.393	79.4788
			6.94815	79.5175
			72.8719	79.7286
			33.1692	80.0981
			84.0759	80.17
			81.3628	80.3279
			19.7605	80.6723
			99.4403	80.8489
			131.787	81.1618
			136.117	81.4659
			31.1506	81.5138
			64.9558	81.9147
			63.3141	82.4518
			114.361	82.8746
			77.3352	82.9515
			18.1875	83.2403
			17.5309	83.327
			25.5737	83.3782
			16.5284	83.644
			41.3688	83.6748
			30.0819	83.9858
			22.4143	84.1108
			106.269	84.1391
			53.5844	84.4833
			15.7167	84.6775
			117.422	84.8473
			95.9351	85.1232
			63.59	85.1327
			127.551	85.4298
			168.865	85.5436
			45.645	85.6795
			36.2038	86.4916
			15.2466	86.7405
			18.5739	86.7425
			65.4249	87.549
			23.9133	88.5686
			143.512	88.7421
			112.563	88.9567
			28.1134	89.3809
			113.576	89.9011
			90.465	89.9414
			89.6418	89.9822
			28.1383	90.7322
			40.5083	91.01
			88.5522	91.5308
			135.78	91.7693
			36.6551	91.7744
			181.301	92.7571
			147.007	92.8043
			50.6805	94.3303
			83.3977	94.3322
			14.0643	94.767
			139.15	95.3972
			121.674	95.3982
			173.641	95.5163
			92.1838	96.4555
			151.362	96.9386
			26.6596	97.6767
			78.4779	98.6712
			127.482	98.7931
			119.807	98.9491
			50.2948	99.8436
			76.5833	100.555
			46.389	100.897
			77.1557	103.405
			108.964	103.603
			178.477	103.608
			90.3675	104.43
			136.318	104.466
			206.569	105.967
			14.5191	105.985
			14.1824	106.137
			58.5056	106.377
			25.2887	106.759
			50.9088	107.198
			179.597	107.325
			60.8216	107.552
			74.436	108.048
			17.5766	108.916
			47.9866	109.22
			70.5853	109.226
			112.233	112.559
			21.2192	113.993
			66.8149	114.426
			82.0672	114.53
			42.1681	115.289
			11.6811	115.503
			25.9248	116.832
			24.9356	118.32
			137.27	118.457
			33.469	119.466
			15.9593	121.364
			6.98047	124.101
			61.1841	124.406
			69.832	124.438
			17.0578	129.807
			30.451	130.6
			137.645	130.904
			82.8598	131.197
			127.036	134.571
			45.023	135.861
			149.499	142.208
			118.886	147.34
			120.483	152.434
			28.9859	155.346
			53.0211	155.677
			57.8142	155.95
			74.7525	156.903
			85.4012	157.602
			9.45079	161.624
			23.3966	163.282
			31.3416	163.42
			48.4448	163.946
			10.6868	164.399
			7.10891	164.405
			13.39	164.542
			133.444	165.967
			10.6142	166.725
			50.1111	168.188
			43.7684	168.801
			83.7547	172.688
			9.89567	173.89
			140.944	175.38
			29.4563	179.275
			10.86	183.111
			106.713	183.275
			29.9013	185.042
			65.9648	185.649
			17.2358	187.774
			11.0627	199.562
			70.5309	199.821
			138.695	200.334
			22.965	202.404
			20.7885	206.352
			99.2377	223.899
			84.0746	232.336
			148.266	240.212
			111.488	242.124
			62.2464	243.334
			93.1164	248.893
			18.5653	300.664
			24.4529	310.626
			21.5658	491.492

## Sheet: Donor 2
Well 1			Well 2			Well 3			Well 4			Infected cells
CPSF6	CA		CPSF6	CA		CPSF6	CA		CPSF6	CA		Non infected cells
74.2475	9.528		4.84498	4.74817		60.4266	8.54484		3.95726	8.23109
20.1844	12.59		37.0953	12.1614		75.7083	9.08756		48.6771	8.60352
7.57478	16.5868		4.36559	17.1176		78.1722	9.24685		46.761	11.3333			CPSF6 mean	Mean infectivity (%)
5.0236	21.063		24.8272	17.5685		11.4709	9.94231		10.3398	11.6713		NS control	135.786	10.634
8.69278	22.4589		14.9194	18.3041		65.895	10.1576		90.851	12.5747
12.096	22.9278		115.051	18.3183		79.2005	10.3293		41.2035	13.8041
4.76512	23.3776		78.7922	18.8065		27.8551	10.3746		42.0907	13.8139		K/D
7.67308	23.4523		50.0166	20.3115		64.6883	10.8483		54.0094	14.1111		Well	Mean CPSF6	CPSF6 left	K/D efficiency (%)	Infectivity (%)	KD:NS infectivity
5.188	23.6946		7.5438	21.9152		112.532	11.8262		6.53125	16.0517		1	81.6529	60.1362	39.8638	6.061	0.569964
77.9066	24.0793		17.725	24.184		66.9296	11.8279		13.8164	16.1979		2	88.661	65.2975	34.7025	3.542	0.333083
3.24919	24.4137		93.6174	24.304		29.5471	11.9488		86.0094	17.8322		3	93.7384	69.0369	30.9631	1.125	0.105793
27.3693	24.4586		74.2292	24.4714		7.86913	12.1405		47.1683	19.416		4	90.1549	66.3978	33.6022	0.452	0.0425052
62.0209	25.0435		67.0533	24.4817		34.3238	12.3429		48.0751	20.1395
106.24	26.1732		119.404	26.3248		32.0065	12.5994		12.2113	20.7504
3.70039	27.2752		22.0646	26.4878		70.942	13.5942		72.1069	21.0984
170.547	27.3519		104.12	26.5556		78.0048	13.8424		32.6302	21.2454
14.2572	27.5215		136.159	27.3404		18.8259	14.3958		94.7213	21.5846
4.08519	27.6618		134.281	27.5035		88.7977	14.8281		77.9013	21.8964
110.947	27.7199		153.124	28.0289		29.3375	15.579		55.1766	21.8984
64.7949	28.0007		35.1507	28.0341		105.314	15.8979		78.8404	22.0391
75.3881	28.6578		9.78291	28.0422		77.3597	16.0085		9.75238	22.6018
8.93249	28.7999		34.4789	28.0937		79.6952	16.0893		52.1745	22.8993
68.1463	29.0695		136.042	28.6006		4.15531	16.4574		13.3041	22.905
109.87	29.2033		132.615	28.6318		111.287	16.4928		47.1165	22.9285
40.2157	29.5822		124.841	29.0521		39.1605	16.5881		24.7014	23.566
40.8313	29.7463		118.262	29.0802		91.774	16.6071		122.502	23.7067
95.1343	30.0627		134.953	29.1773		48.1374	16.9189		62.743	23.8164
112.913	30.5585		90.2096	29.1945		139.477	17.1473		72.1708	23.8253
21.5538	30.8463		34.7569	29.4051		83.8016	17.2149		73.5612	23.8617
96.9388	30.9785		136.411	29.7499		89.1635	17.5837		65.2367	23.9839
116.682	31.1123		167.82	30.1772		134.8	18.1937		7.6808	24.0052
143.56	31.2914		134.451	30.2054		128.318	18.6055		41.1128	24.3829
51.8932	31.6881		19.1305	30.2657		65.6835	18.8326		101.757	24.5137
144.328	32.0349		34.0948	30.3201		145.497	19.0842		14.3517	24.9394
127.322	32.2316		11.197	30.7573		151.246	19.3388		106.161	25.0792
108.256	32.3977		136.508	30.9106		125.354	19.4052		12.3063	25.2128
135.719	32.4612		31.6526	31.2407		28.0048	19.4757		59.3129	25.3074
9.76498	32.5799		170.89	31.3401		21.9118	19.5244		94.8545	25.3829
38.0347	33.0077		75.6638	31.509		8.30935	20.1043		54.5335	25.4398
6.62738	33.1648		148.878	31.5106		69.5448	20.2042		72.4107	25.6251
5.93627	33.264		144.263	31.536		35.4054	20.3687		94.423	25.9027
90.7239	33.2679		125.344	31.6811		91.6061	20.5219		19.7805	25.9606
90.8585	33.2934		150.593	31.8041		86.3935	20.6202		39.5188	25.9908
62.4055	33.448		159.58	31.8609		55.8187	20.8256		69.7854	26.1105
40.4765	33.5079		113.602	31.8691		96.7616	20.9711		124.319	26.1864
131.651	33.6143		143.429	31.9243		98.5425	21.0133		63.4036	26.1986
170.703	34.1316		123.344	32.4649		82.3544	21.0569		125.915	26.213
116.101	34.1637		149.328	32.4912		122.243	21.1348		43.1056	26.3088
124.512	34.1674		12.2844	32.5397		62.3928	21.4011		127.579	26.9303
130.596	34.2498		141.953	32.8305		121.11	21.4098		63.3249	27.0455
56.8049	34.8255		127.057	32.862		86.5432	21.5354		79.0419	27.1006
136.881	35.5856		144.299	33.0407		113.996	21.9158		86.995	27.145
58.6416	35.5867		136.606	33.1759		20.848	21.9292		111.55	27.2714
95.1927	35.5938		33.2784	33.2162		142.354	22.1336		97.0663	27.3356
131.102	35.7039		46.7295	33.2839		50.0204	22.1787		66.6648	27.4153
18.7298	35.8044		148.858	33.3112		83.7143	22.2148		127.85	27.4182
14.6904	35.8329		148.568	33.3201		146.674	22.2631		115.11	27.5855
62.6915	35.8425		58.326	33.3577		131.379	22.3442		120.631	27.6044
37.273	35.9906		78.216	33.4066		71.9472	22.4203		64.5846	27.6257
87.6964	36.1572		114.718	33.4348		74.1017	22.4857		23.3031	27.7955
123.743	36.1882		107.084	33.7204		65.6534	22.5633		98.1849	27.8043
102.411	36.2138		108.007	34.0433		109.055	22.6183		104.219	27.9076
28.6424	36.2928		135.289	34.1514		90.3196	22.7681		106.706	27.924
49.4467	36.3142		109.852	34.2307		72.6997	22.7957		116.842	27.9389
54.818	36.3227		130.035	34.4608		71.1962	22.9752		107.298	27.9602
109.495	36.5247		13.141	34.6561		103.079	23.2618		126	27.9615
146.167	36.9819		125.205	34.6729		96.4573	23.4504		12.6803	27.9622
85.0568	37.0975		8.7621	35.0192		122.209	23.5103		10.2098	27.9851
6.37063	37.1323		26.711	35.3731		97.0985	23.687		127.587	28.0039
44.0097	37.1359		13.0379	35.458		86.8067	23.6967		84.0784	28.112
123.141	37.4294		110.581	35.803		81.4986	23.7221		86.725	28.1366
107.381	37.5675		118.022	35.8277		135.742	23.7363		76.9106	28.1445
11.0797	37.5818		138.475	35.9052		96.9639	23.8586		74.3183	28.2347
108.666	37.6605		112.369	35.9815		113.482	23.8922		150.015	28.3772
14.7013	37.6693		141.835	36.0223		72.7032	23.895		9.57221	28.4351
107.168	37.7238		121.134	36.067		39.0169	23.9138		95.8341	28.507
16	37.8753		102.188	36.0679		124.87	24.1402		115.968	28.5802
168.732	38.0803		14.5367	36.1993		25.2294	24.167		127.786	28.8372
118.423	38.1684		96.3198	36.2041		123.582	24.1691		120.436	28.9026
42.2	38.1832		102.604	36.2257		51.335	24.2401		106.543	29.0411
127.587	38.2033		129.282	36.2371		98.8362	24.2526		11.7536	29.0488
108.573	38.2282		121.299	36.4169		106.888	24.3362		131.69	29.2297
119.017	38.3884		58.654	36.4469		62.7679	24.3634		10.8057	29.2736
88.9152	38.5321		92.2444	36.5464		70.8294	24.3872		62.3352	29.334
88.75	38.6167		8.98824	36.5648		133.366	24.3946		22.1625	29.5276
135.46	38.7777		51.0054	36.7595		88.3124	24.408		103.038	29.6153
144.951	38.876		91.4606	36.8638		128.816	24.4215		84.4655	29.6385
31.2915	38.9032		124.664	36.9039		63.1425	24.4512		125.404	29.7012
100.821	38.9858		94.8741	36.9726		59.9955	24.6234		5.62667	29.704
94.2784	39.0728		32.7019	37.1539		25.2609	24.633		70.3972	29.7495
126.119	39.1393		127.834	37.1855		59.4872	24.7215		130.269	29.7568
101.733	39.1732		61.2971	37.1951		83.4762	24.8447		144.729	29.7703
40.9748	39.342		85.9459	37.1985		97.0745	24.8506		130.053	29.8245
123.086	39.5973		13.571	37.2744		95.9601	24.8712		48.0941	29.9628
142.774	39.6197		130.098	37.3984		71.0977	24.8821		110.066	30.0059
119.73	39.6335		60.9348	37.4043		176.636	24.8932		75.3077	30.016
108.044	39.8373		164.419	37.414		154.992	24.9152		104.943	30.0436
139.938	40.0729		120.048	37.7557		95.4906	24.9169		105.233	30.1857
103.342	40.3777		21.4133	38.1601		118.086	24.9252		60.2963	30.2163
7.10733	40.6196		50.2933	38.2258		28.2167	24.9809		28.4795	30.2237
17.6855	40.8726		92.7505	38.4833		28.3709	24.9994		128.465	30.249
11.2358	40.9512		60.5039	38.5236		130.189	25.0402		12.4296	30.2669
156.429	41.0339		82.4659	38.5358		58.7526	25.0424		38.7568	30.3141
12.4181	41.1091		123.167	38.6161		69.0176	25.1149		6.74121	30.3255
85.7265	41.3064		91.3544	38.6204		95.1263	25.1608		92.7664	30.3275
101.966	41.3573		111.903	38.6691		71.7542	25.2352		85.6506	30.4082
131.242	41.4624		102.722	38.6888		145.327	25.2731		114.306	30.4221
104.832	41.7053		83.1662	38.7967		151.005	25.2947		86.3249	30.546
105.983	41.7075		117.841	38.8811		99.947	25.391		116.278	30.5504
112.31	41.7264		5.37687	38.992		53.6884	25.6086		93.2382	30.5568
116.097	41.7525		11.5653	39.003		118.828	25.6299		101.426	30.6267
105.1	41.8359		13.5812	39.0099		15.2841	25.7231		187.944	30.8455
11.3864	42.2215		157.859	39.0693		108.217	25.7289		102.683	30.8641
115.215	42.2936		20.0437	39.1263		113.795	25.7524		66.8314	30.9636
12.34	42.3178		38.0406	39.1737		129.204	25.7627		81.8261	30.9753
113.843	42.5047		99.5311	39.2596		120.629	25.7974		117.979	31.0054
131.286	42.7255		142.775	39.3655		116.394	25.8387		86.6862	31.0469
66.0409	42.8101		51.7275	39.3849		128.695	25.8428		26.75	31.1105
44.5489	42.819		54.879	39.567		81.2355	25.8428		11.5146	31.1113
120.479	42.8641		120.463	39.6346		158.723	25.8465		135.698	31.1311
146.62	43.0113		154.501	39.7121		68.944	25.8777		7.29484	31.1375
73.8599	43.2629		84.1325	39.9082		116.919	25.9194		65.7471	31.1413
173.321	44.0968		111.583	39.9616		89.2643	25.9217		69.1026	31.2046
119.163	44.1573		7.20379	40.1492		115.92	25.9956		118.633	31.2144
83.2477	44.3922		7.25909	40.154		109.32	26.0329		53.9313	31.2617
12.6176	44.5578		66.689	40.3162		125.637	26.0812		15.5094	31.3129
86.1605	44.626		93.4692	40.4502		32.8997	26.1412		119.064	31.4169
14.6537	44.7866		146.079	40.4561		16.5893	26.1653		106.991	31.5505
87.9519	44.8173		66.75	40.5952		114.1	26.1873		93.5403	31.6585
167.601	44.8726		144.413	40.6308		138.818	26.1981		109.194	31.6989
31.1431	45.1519		150.361	40.7103		134.787	26.2689		93.8164	31.7333
42.0974	45.2088		29.4988	40.8447		108.294	26.3266		88.6255	31.7582
7.72199	45.2913		145.118	40.8587		148.998	26.3312		45.9584	31.7678
120.023	45.4584		181.016	40.8883		155.771	26.3334		146.528	31.8057
155.28	45.6057		22.1651	40.9214		115.304	26.347		96.6506	31.8447
141.266	45.6718		75.2849	40.969		102.07	26.4107		55.8391	31.8544
149.218	45.7566		87.9238	41.0024		29.5379	26.4107		15.6285	31.8991
142.398	45.8409		116.991	41.1223		117.926	26.415		42.8887	31.9242
100.257	45.8539		83.7839	41.2102		139.39	26.4473		62.1562	32.0947
110.134	46.2967		133.935	41.2288		113.708	26.4868		121.523	32.1763
20.1842	46.3207		125.388	41.5516		126.779	26.6101		65.3054	32.1978
18.9125	46.3443		54.4143	41.5584		15.714	26.628		55.6977	32.3857
94.347	46.6361		17.6624	41.6316		131.665	26.6646		112.478	32.4043
15.5339	46.8052		9.19658	41.6938		108.891	26.6769		156.697	32.4045
87.4538	46.9288		141.743	42.0042		61.3956	26.7153		106.512	32.429
170.92	47.1621		19.3288	42.0048		43.013	26.7253		39.7342	32.5854
17.3233	47.1939		136.269	42.0665		127.834	26.7269		10.8241	32.6185
133.317	47.2587		8.09642	42.2305		113.821	26.7788		137.621	32.6218
166.111	47.3511		143.673	42.2547		127.856	26.8164		107.704	32.7562
90.2705	47.3772		37.6932	42.33		11.4931	26.857		13.8793	32.934
113.579	47.3781		117.991	42.4011		74.9078	26.879		59.2259	32.969
12.9475	47.4694		96.7241	42.5338		164.403	26.9177		187.355	33.1251
123.343	47.4911		61.6189	42.5917		142.274	26.9527		14.7132	33.2866
49.4591	47.9205		61.7846	42.5958		117.818	26.9786		126.842	33.3288
170.479	47.9366		183.496	42.6941		14.7651	27.0037		28.9552	33.3715
147.901	48.0548		124.166	42.7099		69.6568	27.0253		108.997	33.3819
28.415	48.1561		74.5347	42.7902		106.139	27.0488		152.703	33.3922
90.2333	48.2675		70.94	42.8899		110.047	27.0664		9.29147	33.4552
130.678	48.2998		135.211	42.9		126.091	27.1316		124.663	33.4879
62.244	48.5625		157.304	42.9202		30.5116	27.1347		49.2321	33.5721
6.43617	48.5894		12.5571	42.944		132.354	27.1779		153.002	33.5727
125.735	48.599		82.3	43.1087		25.1755	27.2226		109.964	33.6175
117.22	48.7202		129.079	43.1276		16.3432	27.3069		119.584	33.7014
75.3183	48.7892		135.16	43.1474		130.341	27.4493		95.9148	33.7453
142.085	48.8246		143.938	43.2675		129.779	27.468		120.968	33.774
41.0081	49.095		22.3426	43.2756		140.55	27.4793		105.241	33.8456
78.1931	49.1558		125.787	43.4037		151.431	27.5272		124.235	33.8851
144.645	49.2029		143.336	43.4083		121.325	27.5918		114.4	33.9666
67.4785	49.3066		118.398	43.546		132.967	27.605		44.685	34.1259
10.5262	49.598		109.462	43.5636		17.7023	27.6651		136.96	34.1399
119.87	49.6351		57.4217	43.6233		110.489	27.7091		43.5265	34.2954
116.755	50.0008		89.1491	43.6463		104.207	27.7152		114.218	34.3143
180.113	50.0516		116.52	44.1311		127.67	27.8071		94.6672	34.3289
146.851	50.056		76.9942	44.2105		29.3077	27.8194		112.487	34.3984
133.874	50.6415		122.298	44.2731		131.699	27.8463		110.129	34.4182
51.2015	50.6908		66.2944	44.4022		110.295	27.8499		128.38	34.4427
169.803	50.9743		30.2353	44.4032		60.6545	27.8881		13.0425	34.4443
17.4704	51.0704		114.348	44.5356		25.3481	27.9127		99.3963	34.5343
120.142	51.1933		143.872	44.8023		12.9145	27.9572		93.4646	34.6376
18.4558	51.4284		50.5172	45.0339		182.562	27.9812		8.02353	34.6591
184.834	51.4321		135.993	45.145		187.141	28.0057		39.8393	34.7079
139.24	51.7158		144.014	45.2474		153.667	28.0409		162.966	34.7423
45.2575	51.7942		185.772	45.263		150.248	28.0664		106.995	34.7654
74.0746	52.1969		44.5996	45.291		20.5824	28.0679		23.0364	34.7987
183.652	52.2259		9.78904	45.326		22.6045	28.0836		156.43	34.9076
155.627	52.2411		83.7952	45.3439		13.5874	28.1087		156.305	35.0021
136.749	52.3711		99.1048	45.3613		42.769	28.1239		135.003	35.0701
48.9533	52.3994		78.0055	45.773		69.369	28.1621		150.975	35.1108
146.6	52.5343		28.1271	45.8111		55.6447	28.2179		140.517	35.1304
46.3085	52.5499		91.0895	45.8133		169.936	28.246		155.42	35.2321
132.45	52.6673		61.5591	45.972		149.136	28.2566		67.427	35.2742
55.1121	52.9127		105.835	46.1057		15.2771	28.2654		84.415	35.2781
15.861	53.0045		168.152	46.1832		120.282	28.2777		47.486	35.3213
83.7802	53.117		84.4475	46.3834		102.968	28.295		122.272	35.3275
148.22	53.1735		178.629	46.4198		120.125	28.3146		148.741	35.4181
12.5519	53.2578		31.1051	46.5008		123.147	28.3272		80.5833	35.5713
33.0631	53.284		42.9332	46.6598		143.957	28.3395		125.798	35.5819
18.7325	53.301		102.119	46.9203		122.124	28.3544		135.948	35.602
31.7	53.4757		36.8057	47.1022		35.6348	28.3576		90.9104	35.6175
116.702	53.7714		17.4853	47.4051		20.7478	28.4378		137.017	35.6696
135.534	54.1238		159.559	47.6357		123.873	28.5052		98.3223	35.6914
151.551	54.5053		123.182	47.7757		157.861	28.5242		85.2679	35.7566
139.551	54.5296		15.8552	47.8438		107.229	28.5255		127.759	35.7872
11.7649	54.8033		177.777	47.9248		160.791	28.5343		61.803	35.806
151.957	54.8987		122.892	47.9531		141.772	28.5598		137.373	35.8148
19.1846	55.0048		190.541	48.3765		144.231	28.5938		67.6119	35.8336
131.323	55.0447		133.097	48.5287		133.721	28.6477		136.17	35.8658
37.7417	55.0482		120.56	48.5492		98.6078	28.6968		9.0625	35.9541
196.246	55.1563		168.459	48.5544		31.4082	28.7784		131.08	35.9781
119.959	55.525		125.394	48.7658		139.532	28.7955		38.0863	35.9966
96.5	55.5517		22.7291	48.8958		34.7941	28.9419		106.52	36.0055
158.966	55.6757		22.2747	48.9267		15.368	29.0154		160.34	36.0312
121.302	55.7255		115.033	49.0253		126.846	29.0547		119.277	36.0535
11.8653	55.9241		139.591	49.2038		23.798	29.0581		79.9597	36.0614
115.642	55.961		19.9898	49.6939		153.163	29.063		55.1663	36.123
26.5165	56.0655		109.57	49.9269		123.786	29.0682		18	36.1961
125.912	56.1226		154.779	49.9418		121.17	29.0836		121.668	36.2694
102.358	56.1909		110.579	49.9806		51.0749	29.0878		94.6399	36.3887
14.7092	56.3639		129.586	50.3267		48.1728	29.1361		106.09	36.4944
117.173	56.6361		163.032	50.5727		120.248	29.1429		135.439	36.5687
21.763	57.6514		144.495	50.7483		132.502	29.1642		48.5633	36.5714
168.916	57.9003		152.648	50.7491		49.0187	29.1697		66.2204	36.6983
147.505	58.0103		147.27	50.7754		100.952	29.2141		46.3309	36.7135
12.1305	58.1673		11.3258	50.9364		11.2777	29.2199		111.332	36.8093
179.851	58.3974		23.3747	50.9678		12.6241	29.2376		139.29	36.8439
83.3902	58.4371		37.3855	51.0189		163.504	29.2484		70.5021	36.8593
107.792	58.4854		138	51.1569		15.3515	29.26		161.053	36.8659
15.284	58.5471		162.011	51.6265		10.8573	29.2682		168.922	36.9181
159.228	58.5527		90.6694	51.7065		95.2772	29.343		51.3674	36.9305
37.7026	58.6171		161.137	51.7711		61.678	29.4623		110.664	36.9311
73.2982	58.9899		148.03	52.2526		116.444	29.504		40.7215	37.0105
101.28	59.468		97.4286	52.4448		141.341	29.5101		22.1444	37.1575
16.7806	59.6763		125.114	52.5597		11.8172	29.5605		94.7246	37.2027
21.5652	59.7294		127.169	52.576		137.088	29.5794		181.025	37.2347
45.9367	59.9179		84.7892	52.7171		72.1648	29.5878		27.2779	37.2845
124.55	61.2069		91.2518	52.8106		77.9494	29.6502		130.565	37.2944
131.386	61.2738		54.622	52.9682		126.412	29.6643		38.4866	37.3327
19.9483	61.2767		92.3143	53.0242		21.2022	29.6915		153.789	37.3978
59.2563	61.7954		174.021	53.7496		135.33	29.7596		137.353	37.4048
50.4524	62.0787		78.1752	53.8006		167.906	29.8526		36.3951	37.428
190.472	62.1079		141.888	53.8341		55.0244	29.9707		108.89	37.5417
120.346	62.1245		105.308	54.0284		155.22	29.9959		108.374	37.6567
86.4131	62.2578		30.9384	54.3671		117.765	30.1338		114.357	37.7468
169.549	62.3802		149.254	54.4626		160.665	30.1503		79.0929	37.7605
223.994	62.9924		120.491	54.6636		91.3981	30.1506		135.69	37.7708
46.9574	63.7307		176.129	55.0296		136.111	30.2367		140.263	37.8717
15.4961	63.7716		91.6183	55.1088		19.2618	30.4138		37.2284	37.8777
14.1355	64.1929		62.6971	55.1411		114.434	30.438		151.312	37.9564
79.3649	64.2588		23.8005	55.629		125.164	30.4769		115.877	38.0047
22.7493	64.3969		149.932	55.7		35.4276	30.4812		105.096	38.0293
13.5106	64.6326		142.552	55.7661		123.639	30.6355		131.422	38.1138
48.6561	64.7867		70.7815	55.7857		33.1658	30.7239		166.661	38.1389
35.228	65.2746		13.7632	55.8962		120.141	30.9099		86.3728	38.2115
17.0957	65.3704		12.162	56.1729		64.3412	30.9217		95.7922	38.2549
134.233	65.623		59.0326	56.2215		98.8404	30.9336		98.7095	38.2591
21.6803	65.6618		17.5928	56.7721		138.173	30.9704		71.0466	38.2766
153.943	65.7401		140.255	56.8194		79.9565	31.0549		126.426	38.2873
129.114	65.874		78.808	56.9147		6.175	31.0915		71.2706	38.3327
155.021	65.9441		159.159	57.2602		152.471	31.0947		18.5326	38.3582
64.4478	66.2385		88.8889	57.2668		156.103	31.1617		34.3956	38.4782
10.0907	66.5586		34.0249	57.415		144.842	31.176		164.256	38.4972
68.0633	66.6911		118.135	57.6387		10.3389	31.2255		62.4531	38.5256
27.5777	68.3646		83.6561	57.7242		79.1742	31.2662		110.079	38.575
131.269	68.5895		129.885	57.8025		165.826	31.2926		131.514	38.6316
139.176	68.9121		61.5847	57.8563		72.9084	31.3177		22.1842	38.6719
117.914	69.1517		30.7726	57.8601		12.4038	31.3195		88.3961	38.6934
40.0541	69.6123		159.492	57.8927		112.037	31.3802		84.1194	38.704
49.3876	69.7677		11.7624	58.2246		149.374	31.3945		205.223	38.7159
23.9548	69.7741		80.2709	58.7351		145.062	31.4019		91.8278	38.8229
57.3101	70.3147		15.0822	58.7802		57.3037	31.5728		151.575	38.9814
163.148	70.3235		107.31	58.7964		103.093	31.6046		89.3405	38.986
60.9658	70.4582		42.5824	59.216		126.539	31.632		18.5	39.0097
55.473	70.6573		199.609	59.5041		141.103	31.6518		13.2819	39.0797
155.152	71.2171		134.376	59.6701		138.541	31.7222		164.381	39.2477
26.2736	71.2612		13.3883	59.9689		79.1296	31.9663		32.4618	39.2859
49.6239	71.3476		116.016	60.3038		161.89	31.9741		72.3948	39.3206
192.138	71.3958		8.62324	60.588		41.613	31.9829		21.1111	39.3253
17.9158	71.4636		160.011	60.7804		76.3359	31.9936		127.138	39.4365
27.9934	71.5165		153.366	60.7942		14.0189	31.9956		115.674	39.4492
46.6171	71.5379		96.2604	60.8023		101.48	32.0615		109.073	39.6293
9.74576	71.7853		33.433	61.2278		121.613	32.1298		72.4543	39.7836
88.0531	72.3919		70.7473	61.2774		18.0359	32.1673		113.577	39.8033
5.48551	72.4339		148.65	61.4874		175.725	32.2116		8.48288	39.8313
151.262	72.7521		161.303	62.3588		61.1736	32.2558		96.9022	39.905
170.748	73.1937		178.578	62.3987		11.0325	32.2617		79.4793	39.9408
6.66667	73.3416		99.558	62.4949		132.921	32.2675		141.928	39.9663
14.6146	74.3813		158.908	62.6905		111.832	32.3197		36.3597	40.0787
112.754	74.4326		22.8376	62.7558		104.905	32.3745		129.696	40.1148
120.543	74.4334		79.6281	62.9496		78.5607	32.3762		108.45	40.1693
135.909	74.9994		158.148	63.0769		108.561	32.3791		105.839	40.1825
119	75.7584		165.556	63.2002		97.702	32.504		155.848	40.294
131.147	75.8644		131.221	63.3387		127.147	32.6796		27.9604	40.315
32.3234	75.8726		23.2494	63.5201		124.51	32.7284		98.1379	40.3495
143.858	75.9142		98.7268	63.6079		114.527	32.7944		142.067	40.4115
87.236	75.919		182.68	63.6634		139.137	32.7976		140.352	40.4278
29.2562	76.3923		157.589	63.8581		119.286	32.8001		57.7212	40.4736
113.202	76.4582		159.15	64.0943		162.83	32.8458		196.943	40.4768
151.48	76.8928		50.5672	64.4175		132.969	32.8588		112.061	40.581
31.6598	77.1824		29.6005	64.9307		128.127	32.9474		124.278	40.5987
11.9488	77.3915		36.3632	65.0615		159.103	33.1236		117.875	40.6097
13.4803	77.5892		128.826	65.1587		168.404	33.1684		103.332	40.816
32.5373	77.7088		140.532	65.5003		145.581	33.2069		23.0344	40.8377
29.7222	77.8343		9.92167	65.6047		173.783	33.2832		114.624	40.848
19.4101	78.1517		126.375	65.7293		73.2857	33.2933		70.4806	40.8736
160.446	78.3135		116.482	65.9275		148.405	33.3205		40.7064	40.9185
101.014	78.3298		19.3405	66.0966		124.381	33.4009		119.475	40.9749
76.9359	78.4651		22.0827	66.2847		126.741	33.4041		104.095	41.0774
28.4119	78.8659		23.9293	66.2851		128.644	33.4406		135.384	41.1372
10.3087	79.03		18.2759	66.2895		41.0064	33.4503		30.2392	41.1658
8.56679	79.1189		26.3816	66.6137		25.0495	33.4776		149.178	41.2018
189.686	79.1546		18.0022	67.001		70.6856	33.5034		16.0631	41.2752
15.4485	79.2296		35.2857	67.3444		181.539	33.5692		138.411	41.3448
159.769	79.2922		20.015	67.4887		139.43	33.6032		98.1712	41.4188
131.145	79.5012		177.687	67.5101		135.786	33.6054		131.235	41.4648
15.3167	80.004		98.6368	67.9045		140.422	33.6767		120.626	41.4934
119.291	80.1558		137.952	68.0629		45.0737	33.6856		65.8799	41.4971
130.213	80.4049		161.882	68.0724		53.4541	33.6865		73.044	41.5294
14.8814	81.4491		51.0544	68.2063		107.748	33.7135		61.3378	41.5483
125.612	81.7698		19.6538	68.2621		115.11	33.7208		89.2284	41.5909
28.5658	81.8637		158.02	68.4754		90.7663	33.7528		50.6582	41.6091
105.372	81.8675		8.88841	68.502		92.4022	33.7572		141.154	41.6246
96.5704	82.1815		116.769	68.8214		135.232	33.7857		44.3932	41.6496
73.8757	82.189		36.2614	68.9994		155.709	33.8222		176.106	41.66
8.29197	82.5928		52.6014	69.0333		125.196	33.9021		143.794	41.6935
66.2023	83.6138		143.115	69.1138		131.803	33.9193		143.527	41.7075
83.9135	84.1306		49.0657	69.117		127.384	33.9501		25.4108	41.7202
13.2461	84.5445		99.3982	69.999		95.42	33.9563		132.674	41.7301
130.791	85.0337		128.548	70.0609		162.769	34.0083		140.287	41.8096
45.5097	85.2243		116.029	70.1168		108.068	34.0508		101.164	41.8215
92.6813	86.0229		19.5841	70.193		112.155	34.0702		10.7962	41.8452
100.615	86.032		147.666	70.268		20.0774	34.1527		51.5706	41.8575
143.834	86.1363		151.128	70.368		93.0096	34.1747		67.3668	41.8756
111.573	88.2773		81.9642	70.4121		68.3417	34.1784		33.6243	42.1042
84.7872	88.5851		74.5712	70.4135		129.145	34.2064		140.866	42.1319
183.664	88.9676		107.904	70.5051		142.554	34.2085		88.7662	42.2682
135.67	91.1137		50.0024	71.0062		80.6715	34.2319		99.2749	42.2901
8.79481	91.7424		168.877	71.4706		160.965	34.2645		145.224	42.3308
74.3769	91.9992		119.686	71.5469		177.073	34.3101		92.7456	42.3493
28.5345	92.2588		157.273	71.7763		12.1387	34.3111		157.651	42.4708
33.2353	92.3505		49.8726	71.8772		114.275	34.3285		71.8792	42.4816
72.5	92.36		116.459	72.053		92.7851	34.3684		99.4661	42.4824
29.2701	92.4392		8.64241	72.1395		24.5086	34.4023		121.336	42.5459
124.195	92.9559		92.2473	72.5976		33.7827	34.4763		130.956	42.599
19.3266	93.1947		34.7719	72.712		135.286	34.4904		103.735	42.8614
9.20412	94.3697		6.19427	73.6357		107.73	34.5469		13.8528	42.8769
38.8149	95.1137		125.681	73.9154		107.48	34.5528		108.545	42.9788
46.1138	95.2385		43.0214	74.4521		11.6082	34.5631		76.9267	42.9994
194.057	96.0927		171.481	74.8347		103.81	34.6441		104.764	43.022
164.299	96.5178		9.86422	74.9167		126.387	34.6706		166.89	43.1188
16.2099	98.6813		106.629	74.9284		29.1871	34.6905		17.5687	43.135
113.866	99.2026		19.8293	75.3047		15.3879	34.7048		57.8599	43.1485
17.2948	99.9633		123.234	75.5092		154.277	34.7328		100.431	43.2009
72.8221	101.205		9.44012	75.6006		58.6253	34.7383		89.3508	43.2482
9.16894	101.768		154.528	76.3682		133.922	34.7934		128.199	43.3978
7.23614	102.009		150.32	76.4743		71.1832	34.8297		73.3149	43.4917
28.3079	102.056		90.0863	76.5859		81.6282	34.8932		133.944	43.5037
82.432	102.257		14.9195	76.6015		138.844	34.9298		105.881	43.5266
65.7708	102.642		126.559	76.6593		95.2662	34.9482		90.294	43.5964
17.9393	104.178		119.493	76.755		129.268	34.9527		30.3919	43.6182
89.8165	104.644		17.4403	77.0816		126.256	35.0795		105.106	43.7588
35.9695	105.289		160.158	77.3187		141.142	35.1297		126.397	43.8084
11.0622	106.097		105.777	77.3427		8.56291	35.2332		53.2156	43.8848
188.768	106.669		121.099	77.6699		133.471	35.2482		151.62	43.944
21.0389	107.458		144.987	77.8993		50.4078	35.2909		133.95	43.9596
25.0919	108.201		96.7101	78.0083		17.804	35.3758		141.013	43.967
11.1499	109.842		150.471	78.2949		141.349	35.4591		41.935	44.173
5.63604	111.734		135.102	78.4861		152.041	35.4676		65.2467	44.1894
9.35493	112.493		17.6972	78.7993		144.065	35.6471		52.8563	44.2134
15.8563	114.586		19.1848	78.8154		136.217	35.6605		14.4512	44.2748
27.8721	114.799		26.2094	78.8857		136.201	35.6713		94.449	44.3091
100.22	117.367		116.57	79.395		26.8371	35.6716		84.7139	44.3667
176.213	117.402		162.34	79.9793		111.289	35.6999		158.961	44.3744
67.7828	121.079		152.552	80.7126		138.082	35.7852		101.483	44.3823
111.679	121.097		35.0633	80.7605		14.4876	35.8862		111.382	44.404
145.866	123.592		48.0567	81.123		92.1511	35.9312		78.0687	44.4165
61.9561	125.105		83.9005	81.8186		142.559	35.9754		56.3916	44.44
185.596	125.499		160.763	82.0714		148.036	36.0128		100.677	44.5477
116.834	126.175		151.011	82.1812		78.4676	36.0797		127.961	44.6319
12.1941	126.657		170.677	82.4612		6.68493	36.1077		41.0205	44.8078
55.1552	128.095		131.617	82.6766		35.2648	36.1889		114.037	44.9303
32.4751	128.464		150.386	82.7985		24.4575	36.2078		20.9483	44.9496
204.006	128.494		37.3741	84.1315		24.6083	36.2356		69.7305	44.9556
16.1911	131.316		51.6716	85.0645		48.8833	36.2523		136.832	45.0499
165.921	132.005		146.983	85.484		42.3599	36.4905		136.927	45.1434
32.7645	134.254		11.5024	85.6908		20.8698	36.5237		156.458	45.1539
22.7995	136.489		173.277	85.8952		16.681	36.7451		190.015	45.217
59.1061	142.308		148.229	85.9249		92.8924	36.7516		74.5931	45.2722
157.841	145.528		29.3089	86.0489		142.844	36.7536		111.665	45.2793
21.7919	146.008		85.565	86.3029		13.1941	36.7967		21.2345	45.3183
106.787	150.731		6.77011	86.7457		136.903	36.8007		160.934	45.3433
69.4718	151.919		11.1522	87.513		80.3729	36.8486		125.242	45.4343
17.6445	151.956		19.3364	87.5217		137.947	36.8749		92.9624	45.5016
41.7386	152.879		15.0546	88.2083		158.097	36.9129		176.205	45.5108
131.991	153.281		20.8858	88.3784		154.627	37.0673		147.725	45.5654
147.94	156.074		82.3557	88.8562		9.47718	37.2444		98.6209	45.5762
7.64453	158.686		148.641	89.3767		113.055	37.2613		129.824	45.6796
91.7646	159.411		127.768	90.029		6.85325	37.3952		21.9241	45.8074
15.9379	166.769		59.5179	90.0503		151.747	37.5052		106.153	45.8358
69.5924	169.763		21.6756	90.3015		118.073	37.6268		134.082	45.9016
156.264	171.994		115.094	91.134		60.8954	37.6995		147.284	46.0051
129.298	177.025		24.4652	91.896		105.55	37.7272		137.677	46.0118
75.8322	179.72		34.6941	91.9014		137.636	37.9177		103.785	46.0799
123.228	180.89		106.078	91.9199		127.541	37.9404		125.58	46.2418
136.34	193.437		97.0077	92.4276		119.077	38		12.2147	46.2448
61.5593	200.281		94.6142	92.7952		41.6163	38.0539		79.7273	46.3541
130.361	212.578		88.5373	93.1379		90.1928	38.0737		108.815	46.416
147.562	221.978		112.895	93.4534		135.252	38.0965		135.799	46.4177
149.263	223.289		125.176	94.2151		117.669	38.1058		124.643	46.4457
5.845	255.647		24.6066	94.8498		32.0945	38.3229		133.463	46.5027
28.8908	264.511		143.16	95.193		155.065	38.3949		31.9541	46.7592
134.407	264.541		6.59483	95.7224		145.851	38.474		31.8289	46.8903
28.3564	358.496		189.774	96.4468		104.935	38.5463		154.422	46.8976
154.116	361.937		130.164	96.7877		183.552	38.819		75.5302	47.2149
156.459	364.819		15.1233	97.8396		146.125	38.8563		166.424	47.3043
			141.835	98.1099		118.867	38.8887		76.8155	47.4104
			60.8	98.9054		148.068	38.9202		118.541	47.5294
			103.066	99.1012		118.201	38.925		92.654	47.5805
			34.3795	99.5432		127.565	39.2733		135.292	47.617
			103.701	101.165		135.888	39.3118		135.153	47.6776
			30.7235	101.74		150.476	39.3215		124.598	47.7154
			138.819	102.177		148.853	39.4129		14.0967	47.8
			30.8389	103.015		14.5692	39.4211		170.413	47.8924
			25.4037	103.15		137.183	39.4618		145.168	47.9159
			11.289	103.329		154.805	39.5197		13.0162	47.9239
			98.8142	103.458		155	39.5751		14.65	47.9713
			82.6658	103.861		164.705	39.6304		137.863	47.9859
			144.168	104.091		137.898	39.7386		21.8009	48.0706
			193.47	105.087		48.1499	39.7564		15.3779	48.073
			85.5349	105.986		91.0689	39.8139		177.663	48.1052
			120.945	106.678		48.5111	39.8794		133.006	48.1089
			127.943	106.84		117.282	39.9975		96.371	48.234
			148.719	106.876		11.5392	40.0023		109.191	48.5311
			107.092	107.173		69.3888	40.0048		125.701	48.5399
			71.5533	107.804		149.457	40.1777		129.206	48.5832
			33.9029	108.429		152.022	40.2452		89.2346	48.6562
			164.048	109.762		97.6356	40.2539		15.4872	48.9554
			5.1749	110.737		18.286	40.2856		159.978	48.9839
			60.199	111.49		82.9091	40.3035		153.804	49.1908
			30.3247	111.506		117.826	40.3163		23.9273	49.253
			134.585	112.019		11.9304	40.3481		110.869	49.3097
			24.1797	115.622		128.639	40.4829		120.118	49.4321
			60.6786	116.327		137.879	40.5963		166.63	49.7145
			17.0625	116.77		32.0521	40.6521		25.1089	49.7851
			82.2663	116.81		141.049	40.6619		141.221	49.8064
			152.752	117.81		152.136	40.7062		122.27	50.1922
			33.1784	117.866		191.018	40.8205		120.859	50.2897
			37.6759	118.176		106.589	41.0097		140.264	50.3382
			7.34203	121.809		158.874	41.0887		27.7386	50.4832
			97.5144	122.9		41.3705	41.1472		109.342	50.5411
			135.793	123.918		87.1397	41.5992		63.2657	50.7475
			178.812	124.967		149.437	41.6294		95.3914	50.7606
			43.9339	125.748		152.677	41.6502		162.615	50.7636
			144.544	126.53		169.725	41.6959		120.447	50.8126
			20.2255	128.312		115.382	41.7249		180.181	50.9069
			9.42523	129.127		102.807	41.7724		48.014	51.2741
			192.698	130.584		87.2681	41.8494		12.5995	51.3382
			66.4915	131.635		118.39	41.8586		72.8507	51.4826
			52.0575	131.939		144.613	41.8819		18.8241	51.6211
			80.1538	132.212		60.1866	41.8895		80.2659	51.7741
			170.393	132.309		147.436	41.8901		176.58	51.8193
			36.5158	135.34		190.595	41.9056		158.871	51.926
			116.211	137.498		141.19	41.9358		138.334	52.0633
			67.3011	139.219		115.646	41.9985		19.4947	52.0952
			70.051	139.314		48.2396	42.0288		103.624	52.175
			93.8444	142.504		34.1792	42.3031		93.7018	52.2048
			56.6401	143.733		114.239	42.3959		17.54	52.229
			102.565	146.312		133.827	42.4921		163.307	52.2796
			134.498	147.113		155.731	42.7279		18.9673	52.3191
			37.4722	148.018		145.347	42.7444		147.654	52.4262
			87.2297	151.975		133.924	42.953		105.775	52.4349
			12.892	154.121		151.935	43.0423		129.277	52.4677
			17.8893	154.187		150.318	43.0775		117.103	52.4777
			139.038	155.397		117.921	43.1219		25.2908	52.6096
			50.922	155.804		191.757	43.2657		12.5353	52.6396
			77.7477	158.449		153.765	43.3475		168.928	52.6709
			17.2642	160.367		142.879	43.4656		108.016	52.7749
			14.4003	163.339		45.1329	43.5025		20.8825	52.886
			22.2635	163.595		19.7218	43.5378		71.9706	52.8991
			103.678	164.504		141.269	43.6012		57.0086	52.9509
			13.2776	171.893		134.538	43.6775		15.5635	53.0145
			33.9507	173.699		157.726	43.7326		131.043	53.0949
			66.3247	173.717		155.277	43.8048		135.753	53.0979
			21.9864	176.783		19.7654	43.9128		142.204	53.1067
			59.1158	180.253		17.1414	43.9481		95.5879	53.2331
			102.964	188.789		27.9472	44.0599		152.401	53.2697
			46.5714	212.137		63.2734	44.1451		8.78223	53.2937
			127.423	223.205		89.1726	44.3655		104.614	53.4519
			12.5983	223.865		174.397	44.6628		113.59	53.4652
			24.6235	239.59		118.293	44.6631		38.0528	53.5518
			7.47876	257.447		152.78	44.7728		82.7802	53.6224
			33.1226	259.798		110.305	44.7852		20.358	53.7765
			96.8488	265.911		17.9728	44.7906		62.986	53.8719
						98.1432	44.8157		131.676	54.1573
						57.9346	44.8246		179.222	54.1722
						24.718	45.0529		60.549	54.1753
						31.3543	45.0816		149.23	54.2131
						152.179	45.2515		183.889	54.4098
						140.847	45.3173		174.74	54.4208
						153.55	45.3655		22.6048	54.4922
						91.0207	45.3901		128.402	54.57
						142.25	45.3913		134.711	54.6118
						90.3987	45.42		9.17929	54.995
						125.196	45.5506		185.435	55
						107.767	45.5906		130.083	55.0242
						154.67	45.6595		14.3104	55.0495
						103.768	46.0178		142.337	55.2305
						118.082	46.1361		135.341	55.3025
						174.17	46.1603		123.993	55.4164
						70.3465	46.1787		13.3511	55.4844
						115.061	46.2778		84.817	55.607
						149.589	46.4052		95.2819	55.7812
						9.84016	46.4075		171.128	55.7877
						17.0707	46.9159		13.315	55.7933
						106.144	47.1214		118.58	55.833
						114.357	47.343		162.651	55.8357
						81.679	47.6766		149.363	55.8402
						13.0975	47.7468		36.4153	55.8693
						15.5417	47.8369		48.569	55.896
						68.4084	48.0159		145.051	55.9962
						115.855	48.1247		56.732	56.074
						134.103	48.236		17.1952	56.159
						137.1	48.238		151.812	56.322
						184.339	48.4281		101.921	56.3487
						17.229	48.5652		189.036	56.7781
						142.674	48.6609		162.569	56.8529
						20.8957	49.2627		93.0985	56.973
						163.243	49.759		56.1048	57.2504
						153.514	49.879		27.2523	57.4311
						143.842	49.8808		182.506	57.4685
						32.3819	49.9192		175.109	57.639
						163.183	50.6221		44.5217	58.1001
						25.1211	50.7675		14.0694	58.2251
						121.288	50.8372		125.896	58.2467
						19.6587	50.8519		75.1982	58.3525
						162.768	50.9555		15.286	58.7611
						113.507	51.0377		29.3535	58.852
						135.105	51.2169		16.9123	58.8599
						174.702	51.3693		57	58.8908
						9.38802	51.5465		111.312	59.0989
						27.7885	51.5566		93.3701	59.1314
						152.942	51.7098		128.048	59.2059
						57.3445	51.7551		121.056	59.2441
						128.924	51.7695		45.1409	59.4238
						37.3628	51.785		120.832	59.906
						73.2597	52.0783		21.5405	60.0931
						141.794	52.2074		114.664	60.1844
						12.0782	52.2545		146.993	60.3716
						90.7579	52.4017		69.7477	60.6303
						27.6007	52.406		15.1786	60.6718
						142.565	52.4448		89.4946	61.0916
						47.886	52.5931		111.74	61.4778
						150.036	52.7979		139.593	61.5712
						200.4	52.9505		98.897	61.9044
						93.2168	52.9608		63.7758	61.9204
						150.655	53.2356		95.6471	62.192
						16.7305	53.2904		99.9203	62.3821
						121.66	53.5603		100.61	62.4791
						24.7488	53.6954		59.1156	62.4834
						182.24	53.7278		49.6471	62.6929
						111.633	53.7836		84.7175	63.1372
						11.9947	54.1073		43.7351	63.2324
						45.3679	54.138		46.4932	63.2928
						10.1151	54.2595		143.506	63.2961
						79.445	54.3057		129.883	63.3067
						11.1053	54.3861		156.208	63.3261
						30.703	54.4649		20.4297	63.4344
						135.016	54.6702		186.866	63.8909
						22.1378	54.9765		115.193	64.0815
						55.6713	55.4846		40.7977	64.1158
						131.995	55.5776		150.98	64.1426
						6.53864	55.621		76.442	64.3497
						146.429	55.809		162.85	64.4301
						151.655	55.8767		36.1348	64.4943
						15.987	56.0681		24.8665	64.8438
						90.7251	56.3291		12.3655	65.1902
						31.8421	56.3455		135.446	65.2398
						172.019	56.3892		88.82	65.2529
						27.7611	56.5491		13.9516	65.2989
						154.634	56.6414		47.8209	65.5793
						109.165	57.191		20.4965	65.6784
						138.946	58.3828		22.4216	65.7597
						70.5481	58.6099		37.0818	65.7773
						98.8311	58.6288		24.5076	66.1557
						87.7946	58.8882		13.9094	66.2348
						18.4521	58.8892		104.233	66.4929
						65.0448	58.9624		13.5138	66.7914
						34.4019	59.5482		217.578	66.8972
						58.122	59.8663		125.51	66.9334
						57.4128	59.9712		11.5345	67.4725
						70.9258	60.354		149.1	67.6461
						64.3784	60.3632		49.5248	67.944
						164.852	60.4644		147.204	68.6651
						128.413	60.6337		59.7293	68.9671
						88.6123	61.0186		18.1815	68.9944
						135.173	61.1509		118.83	69.4095
						138.443	61.1673		25.1058	69.4512
						20.9045	61.7992		133.866	69.8428
						7.90765	62.0189		148.182	69.9046
						55.0252	62.7594		93.6647	70.1509
						48.3811	63.016		168.422	70.6489
						54.1136	63.1403		166.398	70.75
						17.7234	63.4007		15.7666	70.7702
						110.376	63.7881		32.9045	70.7742
						12.6058	64.0974		62.2595	71.0021
						145.691	64.1347		145.465	71.3708
						173.778	64.1372		22.1107	72.0914
						107.574	64.4435		21.1417	72.1758
						16.5592	64.4577		39.273	72.2211
						15.2136	64.6991		144.306	72.2659
						143.427	64.9628		51.1283	72.5593
						11.7616	65.3467		107.514	72.6513
						145.892	65.3607		17.3846	72.8351
						12.8739	65.3614		158.431	72.9785
						16.8144	65.6077		137.627	73.0519
						121.58	65.7437		42.3152	73.0678
						12.4857	65.8723		64.3518	73.1547
						135.164	66.2034		149.015	73.3375
						14.1446	66.582		53.8538	73.4768
						26.2222	66.5835		168.911	73.537
						89.5105	66.5986		138.22	73.5742
						147.307	66.8361		63.1562	73.5893
						163.461	67.1319		9.21516	73.7634
						49.2938	67.1635		17.0805	73.8547
						98.3103	68.6835		42.2696	73.9251
						51.2744	68.8148		134.574	74.1534
						48.7703	68.9098		175.055	74.1589
						67.6137	70.2987		152.043	74.5155
						168.573	70.5156		14.3403	74.737
						170.969	73.127		15.2312	75.7375
						156.753	73.1898		121.659	75.8633
						33.4238	73.2114		63.7449	76.8915
						14.6934	73.6744		55.9581	77.0794
						28.1424	74.1259		48.8291	77.0812
						121.984	74.772		155.664	77.9288
						184.076	74.7879		15.6477	79.4731
						16.1933	74.8411		40.8827	80.1528
						23.7771	75.9396		18.9591	81.369
						60.0234	76.0374		11.9773	82.4821
						25.4879	76.2063		163.815	82.5087
						132.744	76.6958		19.3	85.2037
						88.4244	77.1802		106.458	85.4227
						121.524	77.239		134.667	85.4326
						144.605	77.3312		142.194	85.4343
						137.178	78.0418		147.578	86.0219
						30.7759	78.542		143.482	86.4414
						215.235	79.0222		171.144	86.8195
						31.6113	79.844		112.595	88.8582
						69.316	80.3204		188.449	89.1726
						174.328	80.5265		148.782	90.4391
						149.958	80.5733		84.2867	90.8123
						12.3709	80.8663		133.984	90.9195
						15.0709	80.88		16.4331	93.3325
						25.0297	82.2591		185.276	94.0481
						58.4206	82.5031		167.342	94.1423
						22.5257	83.1807		25.5758	95.937
						22.6026	84.2901		178.95	96.4612
						12.6187	84.9185		14.4459	101.468
						175.273	86.1127		14.3349	106.596
						6.18333	86.2472		25.1242	109.663
						22.5103	86.9012		108.861	112.155
						124.261	89.0325		39.9586	113.054
						179.845	89.1184		74.0497	114.526
						6.12428	90.9029		138.738	114.931
						119.343	90.9624		138.854	115.219
						17.0539	92.0804		141.559	122.653
						147.997	92.8216		88.6904	134.516
						108.107	93.3165		12.0769	139.257
						132.195	93.8106		25.6605	152.796
						118.536	94.2819
						154.644	94.7406
						76.6433	95.0081
						23.0904	96.3753
						77.2134	96.9772
						173.444	98.7996
						73.0458	99.083
						71.7802	100.719
						105.316	101.44
						140.007	103.262
						76.2193	103.467
						22.6306	105.258
						109.376	106.469
						99.0987	108.492
						51.0561	110.686
						68.537	111.003
						145.332	113.249
						12.7365	113.38
						20.8935	114.815
						50.3178	116.767
						152.353	117.806
						71.5673	120.283
						91.9185	128.576
						75.1036	129.395
						125.276	130.146
						26.7507	136.544
						128.015	137.031
						73.9317	147.07
						27.8521	154.647
						103.821	157.299
						113.67	160.443
						56.9144	171.684
						94.9004	172.806
						93.3949	184.17
						148.617	198.103
						49.0644	247.455

## Sheet: Donor 3
Well 1			Well 2			Infected cells
CPSF6	CA		CPSF6	CA		Non infected cells
52.1828	7.76952		46.9205	8.09692
16.9561	7.79493		11.4846	8.78149
18	8.41245		3.26733	9.03333			CPSF6 mean	Mean infectivity (%)
8.2369	8.73409		40.2227	9.03434		NS control	93.4513	27.0865
11.265	8.83424		12.1413	9.17766
6.5942	9.31915		50.0136	9.53829
56.4886	9.46869		44.5658	9.78431		K/D
70.1211	10.0684		54.7716	10.1148		Well	Mean CPSF6	CPSF6 left	K/D efficiency (%)	Infectivity (%)	KD:NS infectivity
48.4083	10.233		6.89686	10.1416		1	51.9913	55.6355	44.3645	19.013	0.702105
10.4769	10.2708		49.9941	10.4252		2	56.1685	60.1054	39.8946	14.758	0.544978
43.8161	10.3482		66.3632	10.5514
38.7684	10.4154		53.9733	10.6373
10.4513	10.4326		57.4099	10.68
6.96731	10.7054		62.5061	10.7341
6.48787	11.1794		39.0714	10.865
34.1771	11.2462		19.5757	10.8785
62.2049	11.3922		34.3988	10.9101
31.844	11.645		44.9339	10.9572
33.6011	11.7607		36.3383	10.9662
8.96392	11.7972		9.94693	11.1325
73.7116	12.1701		51.8023	11.1708
27.3318	12.2364		51.3086	11.2481
49.6186	12.3198		62.934	11.2834
9.78512	12.4812		25.9892	11.6026
50.2073	12.5649		52.75	11.6817
11.0158	12.6366		55.858	11.72
68.2531	12.7646		10.6314	11.7653
12.4232	12.8316		62.6556	11.8212
9.46961	12.8914		10.9452	11.8406
60.5379	12.8971		30.4089	11.9195
42.0436	12.9928		41.581	12
6.71556	13.4195		66.7271	12.0304
57.66	13.4479		10.5764	12.1655
11.5562	13.4541		20.2016	12.2132
45.5772	13.5657		5.27935	12.2569
8.5218	13.6798		30.5464	12.2846
77.9077	13.7063		10.6629	12.3205
11.8222	13.7321		45.8292	12.5023
36.2714	13.8099		58.6856	12.523
7.45843	13.8364		75.4914	12.9359
65.5877	13.871		110.559	13.1918
29.8529	13.9316		83.7176	13.2101
32.8123	14.0179		64.8968	13.393
36.0633	14.2929		81.6389	13.4574
55.4869	14.3297		8.70772	13.4797
48.9918	14.8826		68.8727	13.5837
58.5432	14.9011		8.35913	13.5918
48.6742	15.0236		15.707	13.6358
35.9634	15.2338		9.41216	13.6459
95.0851	15.3474		54.3095	13.6641
15.7024	15.4201		71.6787	13.7764
9.4801	15.7212		37.495	13.9203
48.3305	16.1663		37.1397	14.2291
44.9073	16.4382		51.4464	14.2429
41.2578	16.5615		29.0536	14.4098
9.46853	16.7784		60.8014	14.5295
17.9918	16.8155		76.9527	14.5706
12.7798	16.8337		78.8974	14.5969
88.0633	16.8963		19.8012	14.6282
15.1568	17.0399		55.3542	14.6872
36.9043	17.0499		51.7402	14.7357
35.1272	17.0913		44.875	14.788
21.9019	17.1952		60.3415	14.8882
65.461	17.1975		66.0769	14.9551
67.2865	17.2944		16.4104	15.0171
14.8118	17.3103		49.5712	15.0843
8.09168	17.3513		10.6763	15.1384
7.92962	17.4642		40.1124	15.1577
7.16562	17.5026		68.4786	15.3634
23.1552	17.699		70.1699	15.3783
52.0255	17.7873		20.6756	15.5079
16.4372	17.8236		52.5495	15.6404
64.9556	17.9911		83.2121	15.6819
12.838	18.0146		86.6884	15.7728
11.7546	18.1098		21.1454	15.836
59.2271	18.1239		50.8683	16.0134
61.5623	18.1511		46.5913	16.2524
50.212	18.3304		60.108	16.3065
8.54684	18.3356		56.7214	16.5042
30.616	18.3942		44.2507	16.5256
13.2941	18.4802		6.53293	16.6017
46.9492	18.5046		13.3793	16.6917
14.4832	18.5463		5.59494	16.7479
58.059	18.5743		36.1651	17.0447
62.1796	18.6517		30.4748	17.2082
24.9115	19.0926		52.866	17.2828
43.4462	19.1894		60.3135	17.2848
72.7057	19.267		77.215	17.3883
6.82948	19.2756		6.08193	17.5954
9.33021	19.2988		52.2863	17.698
11.5656	19.4615		14.7596	17.8238
79.377	19.5152		94.8477	17.8424
63.2816	19.7147		60.8715	17.8901
8.38197	19.8148		54.3247	18.0652
45.9058	19.8385		81.4986	18.3242
16.1743	19.9712		74.5688	18.3358
74.1522	20.0482		4.32773	18.4365
14.2431	20.1707		60.3575	18.5875
93.1124	20.2031		8.50205	18.7574
11.5165	20.3397		113.326	18.7752
10.1156	20.4159		77.4548	18.8239
55.6566	20.5181		24.6206	18.8812
60.8687	20.6012		62.7442	18.8833
32.6106	20.615		42.1094	18.9557
8.04459	20.7022		73.4945	19.0439
9.41463	20.7394		47.0758	19.1969
111.718	20.8147		47.8376	19.233
19.6775	20.8227		9.18103	19.3682
11.6812	20.9143		14.1337	19.4217
110.19	21.0306		11.1854	19.4402
9.94236	21.0827		56.9612	19.454
37.9279	21.2668		12.9381	19.5739
11.4076	21.3248		53.2256	19.6197
90.9605	21.4225		10.3814	19.6675
125.769	21.4342		42.3821	19.7049
52.1436	21.5103		11.5577	19.8318
114.792	21.5252		82.0305	19.8361
19.6957	21.5448		72.853	19.9056
8.82561	21.6365		48.6149	19.9248
7.10409	21.6567		67.5127	19.9622
64.8849	21.7292		23.4536	19.976
12.5039	21.742		15.3478	19.9833
7.75852	21.7658		70.1051	20.0258
25.8995	21.769		62.7107	20.0481
157.044	21.8381		50.6438	20.1739
72.4463	21.8976		12.1322	20.178
12.659	21.914		54.4224	20.3586
11.4613	21.9331		49.2563	20.3955
25.7066	21.9352		12.3256	20.4273
60.7751	21.947		58.4862	20.4914
27.7291	22.1215		117.925	20.501
13.0893	22.1529		26.4018	20.5447
11.2984	22.2139		47.3886	20.5537
35.6944	22.2484		120.982	20.7276
27.5665	22.25		13.1737	20.7595
66.5053	22.2688		63.7781	20.855
10.0435	22.3789		50.1377	20.9682
10.1265	22.4374		54.0765	21.0126
36.0506	22.4483		20.2318	21.0213
29.4378	22.4522		59.3065	21.0729
55.4476	22.6652		8.52181	21.1119
14.2782	22.7358		12.561	21.177
138.569	22.7967		67.8186	21.1867
62.7251	22.8217		16.2462	21.2448
108.475	22.8594		48.1303	21.2646
114.506	22.8797		51.5789	21.2802
57.2341	22.9072		36.0299	21.2884
12.4062	22.9129		57.5539	21.3464
105.524	22.9306		63.5897	21.3737
53.5964	22.9731		56.4369	21.4219
64.5702	22.9738		56.8063	21.4398
61.5556	22.9782		54.1273	21.539
14.1132	23.09		54.0948	21.5462
8.46482	23.1306		26.1838	21.631
125.228	23.1764		99.8142	21.6583
4.30976	23.2178		72.8585	21.6859
13.1013	23.2411		6.47319	21.692
4.92308	23.3182		58.5378	21.7096
64.1214	23.3198		31.2331	21.7135
8.52439	23.3223		66.2803	21.7378
124.367	23.34		55.8727	21.7685
99.5676	23.3693		14.9629	21.8216
50.1327	23.3759		52.3912	21.8421
8.69367	23.3845		59.6443	21.93
10.2229	23.5405		48.8161	21.9694
16.7475	23.5505		54.9656	21.994
14.0905	23.6772		23.816	22.0334
39.8252	23.7151		16.0192	22.1297
41.197	23.75		74.1121	22.1513
14.6694	23.7587		22.7591	22.1597
11.3027	23.7598		15.9129	22.1641
12.736	23.8125		64.6484	22.1957
12.0877	23.8136		43.577	22.2678
92.7132	23.8263		73.8509	22.2781
22.7143	23.8404		142.065	22.2883
98.4587	23.854		40.3266	22.313
45.9237	23.8807		68.9742	22.3333
79.0761	23.8935		52.7244	22.335
13.2968	23.9014		95.3265	22.3353
10.0439	23.9333		74.4798	22.3531
12.5058	23.9862		48.9217	22.3646
150.114	23.9918		63.1273	22.3811
82.5142	23.9928		11.5707	22.4036
126.359	24.0069		22.8902	22.4076
45.8607	24.0272		75.5933	22.4517
19.0959	24.0661		15.4749	22.5044
23.1388	24.083		11.0871	22.5193
11.9037	24.0839		18.2238	22.5636
23.9452	24.0892		30.6683	22.6042
26.0786	24.2008		36.4808	22.7142
14.6685	24.2015		45.4494	22.7433
15.4153	24.2223		70.6723	22.8485
20.2785	24.2343		87.1288	22.8856
33.7418	24.3014		79.6973	22.9113
38.9975	24.351		27.1618	22.9324
141.7	24.3691		67.9055	22.9711
66.68	24.3986		81.8432	22.9858
35.2317	24.4208		46.2804	22.9934
44.7492	24.4353		70.3496	23.0612
76.3094	24.473		47.018	23.0745
6.25067	24.4944		65.9852	23.0775
117.659	24.5129		102.957	23.1141
128.854	24.5389		54.4879	23.1201
51.3525	24.5495		116.344	23.135
7.58841	24.5606		33.8056	23.1596
5.48617	24.5992		46.7324	23.207
11.7119	24.6361		70.972	23.2235
105.726	24.6598		30.4449	23.2437
11.2752	24.6723		72.4103	23.3028
71.8272	24.7161		9.61889	23.3144
159.989	24.7415		52.0172	23.3628
9.68182	24.7423		76.9478	23.3877
90.3013	24.7442		10.2152	23.6083
141.851	24.7679		51.5447	23.6108
43.6815	24.7795		70.246	23.6339
122.367	24.7968		39.311	23.6353
14.7631	24.801		9.40308	23.6532
7.91772	24.8027		51.3117	23.7147
48.9511	24.8307		70.8189	23.7224
92.5838	24.8905		13.5967	23.7267
61.4045	25.0201		46.9585	23.7297
51.2031	25.0522		56.8535	23.7535
35.8357	25.0867		47.3639	23.8199
61.0568	25.1065		16.3549	23.8306
11.4593	25.1095		54.7838	23.8309
63.1976	25.1438		40.9037	23.8326
16.3158	25.1485		9.38806	23.8618
18.1672	25.1624		10.2926	23.8678
128.19	25.1946		8.73438	23.9211
25.644	25.2172		58.4805	23.9332
20.3235	25.2195		104.293	23.9541
16.9821	25.2686		40.4293	23.9976
7.19433	25.2997		22.5199	24.0758
9.73397	25.3111		7.711	24.1068
10.0948	25.3417		14.9806	24.1425
142.037	25.3586		59.8505	24.1704
16.9423	25.3845		74.9014	24.1746
64.8114	25.4394		44.4107	24.1757
19.9003	25.4492		10.6911	24.1816
100.695	25.4661		93.5864	24.3116
125.639	25.5256		81.6942	24.3201
81.6585	25.5317		45.5365	24.3304
12.9537	25.5364		64.1436	24.3654
16.4975	25.5481		22.7181	24.4419
49.3851	25.5562		29.5014	24.4558
117.859	25.5751		72.25	24.4867
141.881	25.579		72.408	24.4966
120.272	25.612		40.5734	24.5159
19.4063	25.6227		13.5442	24.5211
11.7911	25.6233		7.96009	24.5392
16.8931	25.6333		24.2787	24.5629
19.1108	25.6353		95.9901	24.5733
61.414	25.6488		68.5375	24.5872
18.1749	25.6619		44.0143	24.5998
16.3362	25.6769		78.1425	24.6156
27.8361	25.6796		65.7598	24.6588
85.4789	25.7034		89.474	24.6805
4.6412	25.7163		62.7996	24.7207
113.51	25.7634		55.1391	24.7245
8.52113	25.7682		76.5369	24.7356
82.1202	25.7821		46.0967	24.7401
13.2034	25.8244		8.90625	24.7689
16.4591	25.8382		37.7855	24.8058
10.4368	25.8452		92.2318	24.8161
66.0072	25.8502		12.4299	24.8979
62.026	25.8615		40.1931	24.9376
6.57367	25.8779		67.5464	24.9661
143.728	25.9067		71.054	25.0044
30.0459	25.9138		107.831	25.0677
20.936	25.92		57.8373	25.1102
98.4912	25.9323		12.6084	25.1704
123.494	26.0288		10.639	25.1974
24.7638	26.0326		82.8095	25.3635
21.1233	26.053		37.7812	25.3693
31.1635	26.1066		56.4286	25.3843
9.29899	26.1359		37.9362	25.4467
97.8679	26.1534		98.0494	25.4774
100.559	26.1581		5.57282	25.4871
97.7478	26.1774		117.571	25.5049
145.033	26.2079		4.50314	25.5532
15.9518	26.2876		23.1573	25.5636
11.9274	26.2886		105.755	25.5793
17.4154	26.2908		85.0246	25.5912
15.7445	26.293		167.898	25.5993
54.1588	26.295		61.3292	25.656
55.9661	26.298		14.5691	25.6695
8.95796	26.371		77.1288	25.7361
30.5515	26.4003		33.2258	25.7665
17.058	26.4008		60.9855	25.8738
54.2252	26.4069		55.806	25.8747
50.0939	26.443		15.101	25.8942
54.9753	26.4768		27.7886	25.8996
9.47911	26.4798		24.8541	25.9293
32.0692	26.4907		54.9524	25.9347
83.0656	26.5313		23.7534	25.9416
50.2085	26.5381		71.3681	25.9437
11.3717	26.5588		18.1568	25.9674
19.9971	26.5949		15.9131	25.9864
60.6433	26.6138		41.4932	26.0068
14.7543	26.6267		18.6835	26.0123
59.7311	26.6516		99.3879	26.019
20.7775	26.6557		63.5804	26.036
16.1797	26.6561		12.0455	26.0409
138.327	26.6633		103.259	26.1222
11.1719	26.6787		52.2654	26.2117
5.30123	26.7172		105.246	26.2267
115.793	26.7271		70.8723	26.2283
13.5173	26.7325		50.4312	26.2286
47.7632	26.785		64.115	26.288
114.065	26.803		37.4305	26.2922
57.4851	26.809		9.59767	26.3345
52.2742	26.8297		52.3492	26.3578
82.4444	26.8503		67.2465	26.3694
8.59459	26.8561		135.779	26.3765
15.2763	26.8609		93.1491	26.4122
69.302	26.8634		120.367	26.418
23.9402	26.8818		34.1972	26.4404
18.8402	26.925		7.61845	26.499
72.8345	26.9669		116.114	26.5024
49.1599	26.9758		103.841	26.504
24.3945	26.9816		71.8617	26.5058
9.58032	26.9847		21.1919	26.5071
38.6108	26.9865		50.153	26.5076
91.8175	26.9877		39.0653	26.5078
16.4205	27.0141		22.2464	26.5272
30.4318	27.0387		21.1893	26.5699
18.4706	27.0391		117.884	26.6132
155.989	27.0515		28.754	26.6266
101.314	27.0805		7.92992	26.6715
75.9656	27.1294		64.3211	26.6731
80.4164	27.1458		78.6068	26.6873
119.924	27.1707		52.5398	26.6893
56.48	27.171		59.4286	26.6917
110.047	27.1725		46.9404	26.7443
35.2073	27.1854		92.1646	26.7571
26.9605	27.255		68.4241	26.7687
22.7922	27.26		38.2181	26.8077
79.4167	27.267		31.1984	26.8193
47.723	27.2916		41.0361	26.8212
13.9934	27.3239		79.068	26.8275
11.9026	27.3353		16.6514	26.8361
137.017	27.3438		42.8563	26.873
119.852	27.3799		13.8074	26.8987
10.186	27.4038		66.0705	26.9104
100.918	27.4126		37.6723	26.916
164.736	27.4181		43.3713	26.9315
50.7258	27.497		114.406	26.963
81.8785	27.51		88.312	26.9884
92.0649	27.6036		90.1691	27.0124
10.1124	27.6522		36.5913	27.0272
33.1921	27.6585		15.4527	27.0398
68.8841	27.6789		37.1364	27.0567
13.315	27.698		84.128	27.0624
53.2236	27.8053		104.342	27.0631
11.2043	27.8128		53.1267	27.0645
11.391	27.8377		92.6409	27.0685
44.6442	27.8483		25.0576	27.1175
15.7534	27.8758		10.6332	27.1923
128.282	27.9344		44.6878	27.2269
29.5345	27.9469		60.2971	27.2285
111.603	27.9626		144.087	27.2506
14.5961	27.9859		108.408	27.2554
34.3466	28.0353		33.4701	27.2762
145.584	28.0428		19.6547	27.2844
10.1176	28.0442		55.7469	27.2848
11.8094	28.0547		115.979	27.2951
75.6695	28.0612		133.291	27.3254
129.991	28.0932		146.787	27.3407
153.193	28.0948		15.3047	27.3413
14.189	28.1229		61.8512	27.3685
14.562	28.1257		87.3589	27.3896
130.123	28.1263		19.7927	27.3946
13.4409	28.1282		106.194	27.4336
78.1537	28.1343		38.089	27.4405
58.6344	28.1427		111.489	27.4977
42.9213	28.1857		13.2477	27.5215
71.9527	28.1983		135.662	27.5227
137.177	28.2631		8.64607	27.5336
152.343	28.3046		15.2971	27.5463
50.9458	28.3348		13.0817	27.5489
16.875	28.3401		74.1321	27.5716
139.081	28.348		36.6915	27.588
7.77609	28.4221		103.856	27.6255
76.6794	28.4322		48.2827	27.6359
8.9102	28.4447		27.8513	27.6748
127.77	28.4499		11.8228	27.7057
108.828	28.5206		18.0424	27.7873
92.4311	28.5305		75.7299	27.8109
28.7367	28.5543		31.2005	27.8941
28.0102	28.5853		90.3837	27.9022
19.6401	28.6222		12.0824	27.9041
32.0713	28.6809		55.8156	27.9076
16.6406	28.6867		133.292	27.9224
98.6108	28.7285		37.4301	27.9245
28.1393	28.7349		55.3164	27.9427
12.6054	28.7833		24.1617	27.9532
53.7256	28.7836		20.3515	27.9767
126.172	28.8003		58.9973	27.9814
91.5944	28.8008		65.3084	27.9845
11.0378	28.8238		57.3924	28.0169
47.1317	28.8259		59.0058	28.0634
17.4174	28.8382		117.29	28.0965
143.302	28.8515		51.4504	28.107
54.5638	28.895		90.5786	28.119
105.211	28.9181		60.6024	28.128
19.2735	28.9201		11.0449	28.186
20.061	28.9499		16.7189	28.1934
14.138	28.9613		118.945	28.2083
99.1053	28.9737		74.95	28.2166
7.93686	28.9818		10.4165	28.2732
162.14	28.9876		67.5785	28.2916
102.921	29.0239		10.6279	28.2946
94.8011	29.0622		50.1111	28.2966
131.724	29.0886		67.8916	28.3304
8.79565	29.1223		117.977	28.3446
180.092	29.2502		91.9142	28.3512
10.7517	29.2967		71.9656	28.3863
11.7323	29.3207		46.8042	28.3904
12.875	29.3474		45.1114	28.4236
122.801	29.3737		67.4259	28.4468
9.5339	29.3793		106.453	28.4538
64.07	29.397		61.4655	28.4564
88.9782	29.4139		55.6839	28.4573
87.144	29.4247		89.1917	28.4739
18.4583	29.4273		63.7718	28.482
156.644	29.4452		165.468	28.4852
7.31714	29.4647		71.8558	28.4947
65.2182	29.5152		13.2415	28.4967
52.5783	29.5346		34.8478	28.5581
11.0714	29.54		66.4866	28.573
20.3063	29.5786		10.1321	28.5876
21.3202	29.6192		74.6825	28.5912
47.1985	29.6863		114.661	28.5938
24.4972	29.6923		141.283	28.5961
32.9129	29.7138		11.5234	28.5991
36.3702	29.7267		84.5377	28.6419
38.4188	29.7333		80.4809	28.6703
26.4785	29.7762		156.631	28.7361
157.601	29.7873		120.439	28.7377
12.1846	29.8168		103.457	28.7616
163.283	29.8613		82.8	28.7699
16.4152	29.8793		77.7337	28.7763
25.0588	29.8882		56.3869	28.8194
94.9836	29.9309		69.5503	28.8561
75.3907	29.9318		118.062	28.8569
12.0568	29.9913		75.2964	28.9096
131.704	30.0658		10.8226	28.9263
95.4041	30.0816		108.767	28.9491
66.9625	30.1122		55.5882	28.9586
136.416	30.1247		83.3545	28.9884
105.501	30.1259		122.637	29.0192
70.8598	30.1285		50.0977	29.0246
24.0994	30.1668		10.262	29.0321
15.012	30.2188		16.4323	29.0689
14.3944	30.2687		96.5197	29.0901
12.4786	30.3438		25.9475	29.0968
47.798	30.3497		102.707	29.0972
13.3325	30.3947		14.6375	29.1235
13.5018	30.3982		125.245	29.1321
102.408	30.4815		94.9002	29.1416
139.903	30.5151		26.8391	29.1441
9.58763	30.5221		116.208	29.1584
56.4861	30.5656		77.8125	29.166
15.3278	30.5719		59.6256	29.1808
89.5705	30.5763		66.7564	29.1833
79.1972	30.6139		73.7033	29.2048
119.208	30.6356		60.4062	29.2267
10.7574	30.6398		80.7818	29.2465
16.9373	30.6528		48.375	29.2523
19.0232	30.657		27.2189	29.2547
89.0496	30.6682		20.6215	29.2718
79.6472	30.6862		21.7463	29.2867
9.6079	30.7646		24.2679	29.3214
88.3105	30.7821		57.6331	29.3231
101.982	30.7846		35.6259	29.344
135.784	30.7893		14.0732	29.4032
62.493	30.8409		70.337	29.4344
86.206	30.859		14.8875	29.4488
157.229	30.9028		78.9427	29.4888
125.837	30.9248		106.732	29.4894
30.8064	30.9615		13.8736	29.5508
101.772	30.9713		72.4313	29.5657
142.688	30.9748		122.89	29.6086
152.6	30.9767		71.2743	29.6111
53.7295	31.027		109.873	29.6285
13.8813	31.0359		19.3241	29.6306
144.388	31.0447		76.1265	29.6547
16.9615	31.0817		43.4777	29.665
127.144	31.1365		134.186	29.6835
13.9307	31.1412		51.9429	29.6889
12.4726	31.1593		21.3821	29.6917
13.088	31.1739		18.5196	29.7167
12.5773	31.1825		111.156	29.7232
16.739	31.2		4.24893	29.7538
137.504	31.2147		61.3569	29.7674
144.979	31.2211		120.552	29.7757
10.9895	31.2432		49.5562	29.7888
13.0767	31.2434		75.4071	29.8062
36.6013	31.2507		60.1864	29.8494
61.5551	31.2586		125.32	29.8693
56.482	31.2877		74.5839	29.9456
21.5948	31.3553		144.183	29.9542
55.8656	31.3598		32.4563	29.9558
114.039	31.3782		21.2629	29.9673
80.7367	31.3889		86.4634	29.9816
15.5457	31.3964		60.3747	29.9966
126.339	31.3968		31.3994	30.0044
78.1484	31.4526		11.3397	30.0278
151.844	31.4962		49.5878	30.062
50.688	31.5273		63.3741	30.074
135.81	31.5365		38.4825	30.0855
133.78	31.5582		14.9481	30.109
85.6523	31.5618		15.728	30.109
13.6053	31.5749		64.3147	30.1424
151.228	31.5971		11.6107	30.1521
133.324	31.6096		42.8744	30.1873
79.9758	31.6425		13.6534	30.1877
13.413	31.6544		59.8796	30.1929
132.122	31.681		49.144	30.2089
70.7886	31.6839		24.0638	30.2145
130.104	31.6908		110.843	30.23
72.9436	31.6999		87.5896	30.234
20.6963	31.7235		16.6227	30.2394
25.7685	31.7439		73.2199	30.2612
15.9129	31.7592		112.544	30.2644
25.5439	31.7872		21.6916	30.2957
13.067	31.8052		7.66667	30.3493
7.40045	31.8463		60.4121	30.3997
17.6098	31.9647		12.1411	30.4167
28.913	31.9824		58.9173	30.4211
160.886	31.9897		10.2342	30.4505
32.2082	32.0428		34.4417	30.4538
20.945	32.0811		68.8418	30.4539
25.041	32.1106		55.2418	30.473
90.0334	32.155		18.1887	30.4919
21.2091	32.1912		10.6205	30.5229
178.533	32.2749		103.771	30.586
113.201	32.3507		22.349	30.6257
27.9085	32.3547		35.7186	30.632
13.5591	32.4256		22.9831	30.6513
16.2401	32.4385		16.8148	30.6605
69.6334	32.4587		55.585	30.7072
29.4157	32.4692		64.0177	30.7227
146.203	32.4787		29.8014	30.7255
13.9394	32.5056		99.6493	30.7387
38.442	32.5059		56.2752	30.7389
91.0131	32.5751		50.0535	30.7529
9.91724	32.6068		9.22112	30.7868
116.215	32.6339		37.7107	30.8821
23.8879	32.6386		75.837	30.8951
24.8247	32.687		52.6932	30.8975
31.0525	32.6876		108.713	30.9086
16.3018	32.6976		10.1841	30.924
28.3073	32.6992		14.0367	30.9757
157.638	32.7312		56.5262	30.976
131.483	32.911		96.7994	31.0268
64.3324	32.9148		30.582	31.0591
19.2405	32.9759		59.2165	31.0804
116.612	33.0204		137.844	31.0824
169.646	33.0401		61.9946	31.0924
13.1801	33.076		16.0275	31.1162
12.0268	33.1137		16.6275	31.1204
75.3929	33.1232		51.689	31.1279
77.4286	33.1944		56.5572	31.1325
32.1473	33.204		7.65108	31.1422
9.44589	33.2155		13.0883	31.2145
15.6299	33.2248		27.4753	31.2367
99.6929	33.2268		84.3257	31.2487
85.9874	33.2636		19.7892	31.2749
83.9747	33.3158		30.2592	31.2871
12.6265	33.3189		24.6459	31.3269
84.8934	33.3281		86.2798	31.3537
90.5153	33.3653		125.375	31.3681
114.634	33.3676		71.9418	31.3759
22.5587	33.4101		71.6569	31.4107
11.786	33.423		12.2526	31.4255
6.90766	33.438		32.6555	31.4365
21.0269	33.4406		73.7568	31.4414
115.784	33.4485		131.427	31.4465
114.959	33.4853		98.0153	31.4664
119.586	33.5482		26.6247	31.4676
11.1484	33.5521		84.8302	31.4723
8.34009	33.5562		34.1882	31.4769
129	33.5814		15.2521	31.4971
123.928	33.5816		88.8934	31.5046
14.9492	33.6195		103.506	31.5405
109.466	33.6348		175.953	31.5744
170.417	33.6416		99.8015	31.5837
160.192	33.6511		49.66	31.5883
118.446	33.703		51.7261	31.6316
14.9347	33.7191		101.637	31.6433
127.76	33.7434		32.4716	31.6632
122.071	33.7438		61.7715	31.672
13.6921	33.7645		133.797	31.6916
20.0541	33.7975		35.6962	31.6986
23.7264	33.8957		38.6818	31.7334
18.9699	33.8988		103.227	31.7363
126.809	33.9192		82.6349	31.7484
11.144	33.9495		124.594	31.762
103.313	33.9614		22.1354	31.7899
123.163	33.9884		30.2962	31.8011
142.29	33.9952		37.2826	31.8067
28.1351	34.1803		152.751	31.8242
14.4587	34.2189		18.6433	31.8276
26.5862	34.224		47.456	31.861
57.5797	34.2562		55.4059	31.8818
88.4729	34.257		64.1396	31.9058
39.5872	34.3057		153.989	31.9103
32.1582	34.3735		26.1233	31.9118
105.202	34.466		98.5802	31.9685
132.653	34.4763		12.7251	31.9722
164.831	34.4778		18.1789	32.0212
11.3595	34.5183		21.5164	32.0716
18.4899	34.6301		76.378	32.1147
35.5582	34.6402		71.5028	32.1155
127.899	34.6548		132.809	32.1447
52.0811	34.6991		141.211	32.1684
24.3352	34.7417		11.1037	32.1743
19.2283	34.743		73.3846	32.1804
13.7132	34.7453		68.581	32.1881
20.1484	34.7704		122.995	32.2062
134.962	34.8061		86.8339	32.229
20.6632	34.8119		105.086	32.2779
16.3134	34.8129		159.527	32.2865
9.337	34.8463		68.3634	32.2937
43.248	34.8493		40.5608	32.3802
105.158	34.8531		13.3989	32.3983
21.6717	34.8623		168.956	32.4357
142.41	34.9019		12.155	32.4518
18.2023	34.9337		89.4602	32.4741
137.324	34.9731		90.7606	32.4743
17.1506	34.9834		79.67	32.4927
49.8353	35.0045		90.0732	32.5074
22.8133	35.0783		93.4207	32.5126
141.646	35.087		45.5994	32.539
118.678	35.0878		57.1409	32.5504
14.481	35.0944		46.0306	32.5851
50.2756	35.1044		124.477	32.6027
27.8647	35.1067		20.7577	32.6045
30.3647	35.1683		135.004	32.6058
11.25	35.1704		122.574	32.6439
100.608	35.198		79.0115	32.6839
24.9794	35.2211		130.583	32.6894
8.96053	35.2423		155.579	32.6894
16.0488	35.243		29.8116	32.7305
126.569	35.2435		139.125	32.7815
39.5787	35.2696		61.5978	32.7907
15.1445	35.2752		57.3357	32.791
146.113	35.2965		104.71	32.8124
10.2581	35.3069		134.012	32.8184
19.429	35.3201		15.8819	32.8394
32.0481	35.3602		31.3183	32.8821
98.5351	35.3857		13.8283	32.9105
13.4403	35.3923		57.7909	32.915
16.8427	35.4061		142.594	32.9241
14.1022	35.4274		59.7994	32.9261
74.2102	35.4421		140.224	32.9663
42.6161	35.4516		6.17143	32.9807
54.5701	35.5064		11.8546	32.9824
22.6524	35.5065		126.177	33.0062
128.76	35.5223		22.415	33.0107
117.537	35.5309		109.89	33.0417
43.1323	35.559		121.006	33.0596
98.4416	35.5688		112.221	33.0686
59.2372	35.5728		128.461	33.0889
100.434	35.5765		98.788	33.1131
28.7318	35.6085		39.9059	33.1361
16.2776	35.6584		14.5742	33.1404
16.8421	35.6847		94.8933	33.1535
15.5413	35.7416		153.556	33.1551
19.0676	35.7425		15.4116	33.1619
83.5944	35.7738		24.91	33.1675
50.9575	35.8727		24.4139	33.1762
55.3065	35.8872		168.561	33.188
17.3517	35.9522		89.8413	33.1983
12.2028	35.9984		132.345	33.2248
21.7464	36.0403		6.99259	33.2354
39.7065	36.0698		140.382	33.3314
22.1543	36.0913		10.7836	33.3477
12.0432	36.1562		22.5539	33.3752
69.3651	36.1732		14.2476	33.3798
15.6421	36.2086		127.345	33.3823
141.549	36.2724		58.2068	33.4097
106.037	36.3756		119.117	33.4194
32.2976	36.3777		45.6906	33.4235
10.757	36.3976		136.379	33.4832
109.874	36.4021		19.7302	33.5022
64.3396	36.4257		144.795	33.5102
94.5263	36.5623		20.5697	33.5122
116.819	36.5841		129.708	33.5179
20.0085	36.5889		32.1926	33.5259
13.6269	36.5999		28.0833	33.5446
160.523	36.6007		22.6805	33.5576
15.3041	36.6065		142.339	33.5745
22.2257	36.826		51.0428	33.6368
140.5	36.8434		49.1512	33.6559
16.5904	36.8485		58.7257	33.6762
13.4454	36.8731		24.966	33.696
132.431	36.9011		58.219	33.6963
96.8046	37.0233		120.104	33.7066
128.561	37.0256		18.5486	33.7166
22.3628	37.0482		41.0954	33.7338
29.0449	37.0588		47.0623	33.8051
192.898	37.0921		18.5804	33.8099
15.4365	37.1105		105.804	33.8279
37.7373	37.1228		42.9741	33.8362
46.8862	37.1843		18.977	33.873
8.63169	37.2038		143.296	33.8851
112.127	37.2053		14.9083	33.9165
13.0593	37.235		14.7155	33.9179
130.397	37.2427		14.8314	33.9403
26.4097	37.2692		23.9818	33.9764
13.5045	37.2835		107.611	33.9952
16.3435	37.2905		47.0216	34.0072
20.2137	37.3098		50.7605	34.0341
28.1329	37.3144		80.3468	34.0358
36.7485	37.3176		145.797	34.0631
152.17	37.3786		161.524	34.0729
113.929	37.3798		164.887	34.1313
100.038	37.4712		68.0521	34.1488
29.255	37.4731		138.583	34.1893
34.4939	37.4772		92.7077	34.1961
20.8245	37.4916		106.775	34.2572
10.9203	37.5357		24.2151	34.2636
8.80855	37.6123		65.4133	34.2718
104.707	37.6185		122.746	34.3361
28.3958	37.6239		62.0927	34.3735
120.691	37.6426		18.3258	34.42
51.262	37.6538		56.3924	34.427
11.8862	37.6569		28.8433	34.428
149.645	37.6624		5.44469	34.4299
89.4693	37.6823		47.4619	34.439
32.4159	37.7242		5.22727	34.48
194.968	37.7297		83.7054	34.4926
39.3796	37.7341		78.7198	34.5005
122.988	37.8413		12.0406	34.5134
20.7332	37.8726		73.4409	34.5235
26.2706	37.8898		151.096	34.5412
10.2949	37.9401		13.0716	34.5441
32.3791	37.9608		41.3657	34.5614
13.6155	37.9951		71.5723	34.5638
50.5031	38.0022		23.256	34.5709
20.2803	38.0108		19.7386	34.5747
124.681	38.0242		51.3676	34.5921
10.8651	38.0567		118.575	34.6208
22.4394	38.0684		65.5484	34.6253
99.9777	38.0785		23.8351	34.6364
160.347	38.1222		96.1728	34.693
27.1095	38.1285		73.7178	34.7414
18.3497	38.1804		116.036	34.7697
40.4296	38.2222		12.6102	34.8221
160.118	38.2252		40.862	34.8375
13.3672	38.3381		157.422	34.8649
20.4492	38.3534		84.5508	34.8889
144.755	38.3534		111.534	34.9056
25.3457	38.3551		21.644	34.9434
13.962	38.3822		68.2782	34.9525
133.808	38.3933		98.1901	34.9957
134.958	38.4496		20.6059	35.0018
20.3605	38.4969		40.6983	35.0251
18.493	38.5394		53.4641	35.0674
59.5749	38.5782		17.7222	35.0871
113.691	38.6138		69.5535	35.0988
89.9163	38.6624		127.903	35.1285
101.659	38.6892		165.838	35.1372
99.4281	38.7012		127.326	35.1621
28.8656	38.9087		68.1243	35.2053
47.0661	38.9396		48.8324	35.2089
18.6154	38.9545		59.6474	35.2425
39.0953	39.0008		9.46429	35.3043
23.581	39.0473		95.5925	35.3408
25.0111	39.0946		20.7805	35.3608
10.9647	39.1485		91.6906	35.3674
13.3603	39.1843		112.782	35.3875
117.701	39.2068		67.882	35.4013
17.3208	39.2427		135.537	35.4469
39.5935	39.2463		86.3825	35.4813
57.4108	39.2539		15.3318	35.5152
16.2892	39.2605		66.9366	35.5485
114.959	39.2962		109.692	35.6112
154.14	39.3122		109.879	35.6647
171.12	39.3311		126.934	35.7236
50.2574	39.3623		98.8005	35.7351
68.0565	39.4272		34.6569	35.7424
139.193	39.477		58.9433	35.774
23.3343	39.498		18.0098	35.8183
20.6966	39.5657		39.2663	35.8193
41.5783	39.6428		30.8921	35.8547
132.609	39.7035		60.6769	35.8621
145.525	39.7073		87.0243	35.8796
139.97	39.7586		152.315	35.9121
73.7452	39.8053		102.792	35.9242
39.757	39.9118		9.98711	35.9574
45.8808	39.9169		87.0325	35.9787
167.322	39.9579		73.4527	35.9989
148.047	39.9623		43.7167	36.0023
12.1667	39.9981		131.27	36.0165
25.226	40.032		168.427	36.0318
14.1855	40.0327		39.5928	36.0348
111.619	40.0508		91.6391	36.0509
14.6772	40.1416		22.954	36.0605
16.0226	40.382		58.984	36.0606
137.762	40.4389		86.2149	36.1413
55.7832	40.4428		20.6918	36.149
24.5438	40.5158		18.3892	36.1609
16.7143	40.5223		60.4716	36.1818
18.1541	40.5403		74.3653	36.1848
9.23339	40.5543		74.8708	36.2025
20.3481	40.6078		63.2388	36.2282
177.005	40.622		35.2443	36.2701
115.235	40.6506		13.8421	36.3509
26.8289	40.6754		92.4631	36.3559
13.295	40.6873		124.417	36.3562
6.94531	40.7401		121.979	36.3571
55.7995	40.7695		151.142	36.37
125.39	40.8139		127.67	36.396
117.2	41.0166		17.8635	36.4183
80.0119	41.0308		17.8662	36.4262
29.5854	41.0772		132.946	36.4504
37.4797	41.0966		62.4818	36.4604
20.4627	41.0978		121.408	36.473
128.986	41.1713		157.682	36.4899
82.3967	41.2458		139.798	36.4905
8.74286	41.2617		62.0266	36.5215
128.439	41.2687		150.024	36.5398
15.5957	41.3012		10.9757	36.5419
76.9867	41.3223		12.9955	36.571
29.4771	41.4721		99.684	36.6114
9.94624	41.5893		38.7264	36.6591
89.7918	41.62		71.4686	36.6646
92.4875	41.6236		142.603	36.6972
139.951	41.6807		71.1418	36.7389
11.0653	41.7163		12.6959	36.7432
17.2699	41.7843		52.6358	36.7522
11.3357	41.8405		13.366	36.7621
20.0397	41.8522		50.1796	36.7624
14.9539	41.8615		31.9974	36.767
13.2216	41.9018		125.556	36.8049
96.5275	42.0219		5.31203	36.8109
11.8505	42.0276		66.6573	36.8215
31.0147	42.0695		109.836	36.8517
22.9974	42.096		29.6736	36.8587
16.4433	42.1339		6.5	36.878
34.3548	42.1396		169.96	36.8808
16.5803	42.1623		13.6242	36.8975
18.8614	42.2662		62.3843	36.8986
39.8636	42.2803		34.4652	36.9164
25.3456	42.3407		22.0657	36.9268
19.5578	42.4102		94.6023	36.936
19.6742	42.4207		81.8372	36.952
137.099	42.5589		68.8958	36.968
21.5441	42.5873		94.5157	36.9763
11.3473	42.5966		66.1761	37.0037
69.8157	42.6119		108.859	37.0188
161.758	42.6975		72.1257	37.0228
125.755	42.7069		42.1699	37.05
10.8133	42.7678		107.563	37.0642
10.0165	42.8241		117.824	37.0761
61.4902	42.985		19.144	37.0849
86.1191	43.1397		63.6224	37.1447
55.2884	43.1501		68.7613	37.1527
14.2633	43.1821		17.1011	37.1909
127.719	43.2349		136.573	37.2275
111.187	43.3528		23.0173	37.2361
17.8434	43.4303		46.0625	37.2389
10.463	43.4422		20.6562	37.2775
13.8289	43.4819		41.6277	37.3243
32.3617	43.4903		62.8753	37.3396
12.2721	43.5773		59.1672	37.3676
35.7139	43.6462		78.7393	37.3768
25.6189	43.784		130.564	37.4122
12.8489	43.799		141.14	37.4408
36.7445	43.812		24.8982	37.4742
78.3333	43.8634		109.277	37.4888
23.5706	43.9281		36.0873	37.498
26.8147	43.9457		32.4121	37.5138
16.7657	44.1655		25.6314	37.5495
14.8986	44.168		125.879	37.5797
102.9	44.1771		11	37.5998
16.0292	44.3083		123.877	37.6462
19.9815	44.3479		62.888	37.6606
32.5862	44.4421		154.534	37.6952
19.5851	44.4862		59.709	37.6964
64.1582	44.7519		50.1037	37.701
12.388	44.7771		18.3619	37.7099
10.6388	44.7882		18.171	37.7349
23.5287	44.8052		15.8238	37.7576
14.6404	44.8505		65.2507	37.7714
8.8567	44.8758		44.933	37.8523
15.3343	44.8988		35.1719	37.8748
6.97528	44.9047		21.4786	37.8891
122.156	44.9068		132.643	37.9065
38.9803	45.0165		107.49	37.9141
79.4326	45.1272		87.9045	37.9657
24.7338	45.1274		48.4742	37.9813
19.137	45.1349		41.5938	37.9815
28.3083	45.1458		18.804	37.9976
15.7477	45.164		23.075	38.0258
21.4448	45.4088		60.6492	38.0306
11.9611	45.4094		133.181	38.034
22.5461	45.4209		16.7826	38.0496
103.317	45.468		57.6154	38.0578
32.1329	45.4723		10.236	38.1817
18.2724	45.4767		128.282	38.2018
146.863	45.5055		88.4619	38.2271
38.9333	45.5417		106.037	38.2459
35.4192	45.5473		56.7493	38.4103
110.173	45.5775		71.1739	38.454
18.1743	45.5893		88.7765	38.5106
23.4429	45.6911		21.5359	38.5742
112.586	45.8576		79.8204	38.7324
36.7492	45.9539		38.1003	38.7366
6.68456	45.9825		29.1424	38.7923
133.198	46.2652		157.897	38.8276
11.8543	46.2706		12.5819	38.8522
115.555	46.3252		28.2228	38.8561
37.5267	46.4675		14.0195	38.8585
19.8131	46.5079		129.38	38.8598
20.9852	46.5237		65.1769	38.933
40.6719	46.5307		82.3359	38.96
142.705	46.5438		164.227	38.9786
11.8435	46.5893		32.8503	39.0774
74.5939	46.6171		24.9576	39.1105
31.9942	46.6559		33.2979	39.1128
17.9883	46.7687		101.282	39.1307
138.434	46.7932		127.659	39.3152
11.948	46.8933		11.9816	39.3274
18.9057	46.9324		126.281	39.3468
19.0554	46.9463		13.8161	39.3501
17.8049	46.9725		76.7703	39.3954
48.5194	47.0249		57.7341	39.4386
127.251	47.0343		102.593	39.474
15.3807	47.0426		93.4172	39.4824
126.237	47.0882		105.044	39.4825
12.7718	47.2728		96.1233	39.541
143.934	47.3145		16.4343	39.6
138.739	47.4004		13.4104	39.6039
98.9161	47.4088		41.5711	39.6304
17.7249	47.476		29.6394	39.7812
33.7094	47.527		113.09	39.7906
14.9547	47.5661		97.4673	39.8279
24.8944	47.6183		108.727	39.8704
6.77475	47.6422		17.2853	39.9242
21.8109	47.698		141.201	39.9399
13.2042	47.8095		126.108	40.0688
13.5811	47.8565		20.764	40.0715
39.4521	47.8812		73.3284	40.0771
21.56	47.9147		93.2747	40.1291
10.5	47.9407		12.2935	40.1907
105.624	48.028		14.1951	40.2814
14.8841	48.1026		148.561	40.2956
21.4821	48.182		36.2656	40.3194
68.3387	48.2411		32.09	40.3322
12.6336	48.4003		71.0506	40.3384
41.7696	48.57		118.7	40.3491
112.332	48.5924		84.0495	40.3785
16.0559	48.6814		19.5374	40.3877
23.538	48.6949		42.1578	40.4602
150.272	48.7406		25.1023	40.5014
14.5382	48.7857		162.063	40.5412
44.6193	48.8012		11.0199	40.5541
133.176	48.9987		4.00446	40.5766
121.136	49.0129		117.476	40.6218
120.747	49.014		19.5085	40.7006
66.1488	49.0171		30.1571	40.7106
84.1835	49.0434		115.697	40.718
11.6896	49.0997		69.2676	40.7415
13.3273	49.1954		89.3324	40.7422
77.4845	49.4213		164.563	40.7867
12.0771	49.4941		113.728	40.8537
86.6357	49.5138		19.2112	40.8747
11.0481	49.5342		108.102	40.9033
65.9151	49.6889		117.738	40.9137
89.8833	49.7488		54.8579	40.9672
24.1909	49.8184		11.2252	40.989
23.4375	49.8235		26.1717	41.0297
21.0843	49.8308		19.1125	41.0616
22.8455	49.8578		57.9717	41.0754
94.8882	49.9445		129.493	41.0882
13.0131	50.1366		29.9003	41.1348
6.47906	50.191		139.689	41.152
14.8167	50.3213		115.746	41.1878
14.337	50.4361		46.5662	41.2417
17.3783	50.6465		137.011	41.2557
21.9698	50.6513		16.6989	41.3253
20.4748	50.665		16.2527	41.3836
69.1432	51.1925		12.0719	41.3945
59.5479	51.3039		12.5317	41.4174
139.606	51.4589		138.138	41.4368
18.3221	51.4781		18.2507	41.4644
21.3908	51.7524		9.28165	41.4653
24.8815	51.7997		17.2834	41.4661
47.9624	51.9015		19.2219	41.4758
25.6439	51.9875		31.9453	41.5138
13.6304	52.0224		13.3898	41.5629
51.3175	52.225		88.1257	41.5694
19.0142	52.3253		14.9809	41.5963
114.101	52.3379		15.2456	41.6208
14.7711	52.3613		70.9777	41.6812
13.531	52.4024		165.783	41.7349
16.5164	52.4077		125.181	41.7798
17.248	52.427		96.0059	41.7856
12.5126	52.5135		58.3163	41.8346
22.6178	52.7676		128.852	41.8368
144.254	52.8023		16.3091	41.8609
44.9599	52.8376		133.974	41.9254
19.0457	52.841		20.4384	41.9585
73.7152	52.8559		142.724	41.9983
10.8156	52.974		15.6334	42.0328
34.9439	53.0055		130.386	42.0826
23.1995	53.3687		11.3298	42.2017
23.5503	53.4331		72.4441	42.2929
12.8575	53.4415		21.1904	42.3331
15.5718	53.6687		21.9426	42.3754
23.2166	53.9452		32.0671	42.4268
110.98	53.9492		64.5365	42.434
102.437	54.1611		38.866	42.4919
107.799	54.323		26.7678	42.5387
20.6309	54.4052		113.323	42.583
9.63835	54.4293		60.1	42.5918
22.1562	54.4643		57.4474	42.6082
11.2953	54.4728		135.847	42.6388
13.6565	54.5462		50.0086	42.6918
120.522	54.5854		25.1116	42.8029
55.9017	54.9112		41.0696	42.8503
29.9619	54.9969		107.776	42.8813
68.373	55.0859		33.4249	42.8984
19.2605	55.0873		88.6667	42.9294
16.2769	55.2873		84.2184	42.9297
65.4021	55.3679		70.8492	42.9307
10.4109	55.4592		172.108	42.9955
78.6183	55.5198		12.0982	43.0145
7.03612	55.787		137.99	43.0403
105.467	56.3242		18.0933	43.0681
16.6324	56.3333		23.3259	43.0847
29.1832	56.4521		27.3409	43.2714
19.899	56.5173		94.4188	43.2834
19.0192	56.6761		119.465	43.3139
15.4745	56.8825		111.065	43.3225
50.2732	56.9441		34.6667	43.3466
15.6506	57.2501		77.9284	43.348
90.9793	57.3258		45.7508	43.3598
29.9128	57.907		48.7409	43.3669
23.6701	57.9302		45.2386	43.4302
132.227	57.9774		193.335	43.4642
27.4689	58.0144		73.4153	43.4719
6.56848	58.1608		6.93851	43.4841
10.0253	58.195		16.5303	43.4874
34.6904	58.5023		154.792	43.518
22.0037	58.509		120.938	43.5516
19.3704	58.5588		25.2006	43.5727
85.3565	58.6416		128.066	43.5964
75.8706	58.6615		12.307	43.6073
26.3559	59.0346		5.42416	43.6208
69.5605	59.2512		109.45	43.6679
39.6424	59.3544		95.3579	43.6735
19.7071	59.5276		19.7183	43.7304
176.048	59.7752		17.2633	43.7537
13.679	59.8439		144.305	43.7699
13.9066	60.1393		15.5541	43.7873
12.2141	60.1647		86.1543	43.8568
135.807	60.1711		9.94307	43.8855
38.5994	60.2548		64.5187	43.9024
14.8323	60.3099		107.02	43.9041
98.3185	60.4119		47.4727	43.9171
175.563	60.4796		80.8264	43.9589
65.8271	60.677		31.0706	43.9994
54.8477	60.7138		25.062	44.0256
20.1165	60.8271		63.2783	44.0988
6.89767	61.3281		59.8328	44.1232
25.0553	61.7318		25.164	44.1848
5.82595	61.7887		13.1954	44.1987
14.3275	61.8093		20.0778	44.2443
18.2571	61.85		111.919	44.2825
22.2976	61.9241		91.8964	44.2889
162.666	61.9505		125.915	44.2911
138.989	62.0092		46.1148	44.339
22.1892	62.6054		14.7214	44.3483
120.155	62.7177		22.5699	44.3734
132.769	63.0385		30.4697	44.3807
103.257	63.1616		7.97217	44.4168
20.6214	63.1641		136.119	44.4987
129.54	63.2123		17.8123	44.5347
117.725	63.7596		50.1585	44.5421
17.8511	63.8104		56.0723	44.6026
24.9058	63.8245		50.5438	44.635
91.2094	63.8939		163.27	44.6762
36.3217	64.1358		15.5139	44.727
11.0983	64.4077		60.0777	44.7813
33.8029	64.5889		16.1164	44.7847
126.344	64.673		162.656	44.7857
12.5287	64.7684		113.191	44.8594
32.0019	64.853		30.5544	44.9374
19.1349	64.9144		18.3966	44.9482
47.8098	64.9352		16.6022	44.9539
24.6348	64.9545		167.206	45.0305
9.98312	64.9878		23.6118	45.0915
32.7853	65.2978		58.0671	45.3199
132.446	65.6533		99.1027	45.3611
112.075	65.7519		15.2004	45.4245
98.1994	65.982		49.2895	45.4912
23.9048	66.4741		23.3811	45.4947
73.9582	66.563		40.0548	45.5009
26.0438	66.567		15.6516	45.5225
23.2616	66.5786		127.63	45.5278
18.3495	66.6855		160.848	45.5609
89.2468	66.719		82.6961	45.5649
22.1511	66.7323		118.596	45.5716
153.706	66.8349		14.8758	45.6655
28.2772	66.9712		16.9401	45.6916
108.816	67.0076		94.5199	45.75
11.9309	67.1469		10.1599	45.7765
120.921	67.2522		17.7823	45.83
20.0365	67.2762		38.3406	45.8692
131.401	67.9172		18.8102	45.8838
117.03	68.0211		71.5874	45.9361
110.504	68.2146		120.147	45.9462
18.346	68.7102		73.4762	46.0675
8.67667	68.8278		51.5166	46.1006
33.3747	68.8503		18.8436	46.1582
13.7743	69.0019		65.8381	46.2132
22.2995	69.0106		29.5488	46.2281
13.0368	69.065		68.1089	46.2936
19.1777	69.2732		74.5513	46.3027
81.5162	69.4292		74.3673	46.335
14.0809	69.4751		10.7856	46.4058
9.5034	69.6805		12.7249	46.427
33.3293	69.8632		78.0719	46.4346
15.5579	70.1036		5.67092	46.5171
9.72383	70.1236		46.8492	46.6453
80.9762	70.2226		160.068	46.6983
24.2202	70.258		13.9525	46.7874
22.6041	70.4974		9.72771	46.9591
66.3299	70.542		7.65591	46.9878
82.5802	70.6184		150.544	46.9916
16.4419	70.7252		23.3413	47.0183
10.6325	70.8206		58.068	47.05
12.8734	70.9001		17.9694	47.079
40.9029	71.1565		24.7165	47.1837
21.2214	71.2356		16.0919	47.3278
82.6105	71.2653		85.8585	47.3506
19.297	71.4623		51.1295	47.3864
35.5991	72.0821		55.4596	47.4656
15.6271	72.5306		55.8475	47.4736
16.9558	72.6652		21.7278	47.5352
33.8515	72.683		130.657	47.7358
36.1759	72.7683		52.798	47.7372
27.8542	72.8397		54.0595	47.7797
130.158	73.1006		167.298	47.8404
154.943	73.1693		103.605	47.9451
128.656	73.2026		11.5374	47.9682
43.6053	73.2718		15.686	48.064
32.7713	73.3903		12.7387	48.1125
107.035	73.6396		20.6727	48.1227
8.81771	73.766		67.7464	48.1507
6.91206	73.8121		19.0952	48.1658
7.57645	73.8683		14.8478	48.3066
140.045	74.37		61.4143	48.4685
40.8282	74.393		12.5266	48.5072
18.162	74.9085		23.7307	48.5849
13.2735	74.9854		18.0473	48.6041
8.67183	75.0632		42.0539	48.6103
9.7464	75.4109		55.336	48.6939
64.0069	75.434		31.1331	48.8286
89.3979	75.9727		107.421	48.8508
110.168	76.2337		113.26	48.8792
158.579	76.2407		12.457	48.9197
26.6586	76.2421		40.9353	49.0316
23.7782	76.6363		99.9429	49.044
50.2968	76.8055		23.6	49.2231
97.5566	76.8382		113.849	49.2706
12.9916	76.9101		32.3642	49.2964
7.54202	77.0741		139.493	49.3915
12.1533	77.5475		121.359	49.4207
132.462	78.3445		16.6051	49.4471
61.8654	78.5738		44.1782	49.4981
63.6636	78.8017		71.146	49.6366
85.9033	78.8215		51.1382	49.6507
40.8093	78.8964		19.391	49.7962
45.7494	78.9101		104.502	49.8369
20.3591	79.0181		26.9023	49.9125
20.976	79.2996		13.6183	49.9977
34.4656	79.4784		141.857	50.0105
12.1341	79.6201		13.8131	50.0408
81.8867	80.1554		82.5754	50.1035
15.7513	80.2691		116.372	50.1541
20.8356	80.7742		117.704	50.2542
157.597	80.8654		95.6806	50.2945
26.8103	80.8875		21.5296	50.374
11.6334	80.9495		76.7622	50.3976
156.177	81.4794		11.0805	50.4024
114.166	81.8925		61.0567	50.4085
66.8074	82.0362		91.5185	50.5857
141.064	82.3275		66.8019	50.6739
97.3703	82.3411		89.9403	50.7096
10.7103	83.0142		8.19636	50.7429
10.4855	83.2677		25.8864	50.8374
18.739	83.2836		82.9462	50.8404
13.9247	83.5704		113.353	50.8558
140.481	83.6469		134.969	50.8867
80.4902	83.7634		134.505	50.9037
153.518	84.077		107.887	51.0106
46.3178	84.5377		13.8162	51.0485
62.1508	84.5857		17.0107	51.0798
18.4723	84.603		51.7346	51.2417
39.8167	85.2279		162.624	51.4104
21.1848	85.5527		96.1365	51.483
52.6435	85.7308		32.2114	51.5089
5.15385	85.7638		138.439	51.5113
8.47202	86.1816		42.8466	51.5728
178.806	86.3996		91.9735	51.6831
36.8146	86.541		72.0394	51.6879
116.564	86.5838		25.92	51.7245
7.16342	86.5998		156.24	51.7896
109.105	86.7382		25.692	51.8229
70.0906	86.843		46.6379	51.8879
112.049	86.9909		56.7483	51.8943
15.2462	87.078		9.36675	51.9521
64.7988	87.7486		72.6702	52.256
79.7405	88.29		22.3648	52.2936
22.2005	88.7068		34.2905	52.333
46.4358	88.7806		100.21	52.3974
92.4308	88.8009		56.5925	52.4942
12.7756	88.9148		84.813	52.5102
90.9661	89.702		13.4751	52.5297
38.1551	89.706		25.8203	52.6303
17.0634	89.782		71.4677	52.6658
44.1801	91.6389		85.9743	52.731
26.3253	91.9267		18.0515	52.9413
34.8356	92.0789		15.43	53.0031
9.7772	92.112		52.7522	53.0965
25.5244	92.2337		22.0263	53.1392
27.7158	93.5019		90.3581	53.1604
144.287	93.5191		145.225	53.2923
4.64574	93.5691		98.7242	53.357
13.1121	93.7315		8.6715	53.3735
54.7	94.0427		132.264	53.4466
89.7036	94.1086		83.0705	53.4697
12.2995	94.4535		68.6742	53.6046
58.1961	94.6144		15.6154	53.616
27.0428	94.7484		28.6263	53.6179
32.7356	95.351		57.6747	53.6395
31.674	95.6005		8.816	53.6565
86.2711	95.7642		52.3942	53.7586
102.848	96.046		104.008	53.8707
12.6447	96.381		120.499	53.8768
81.8842	96.4773		57.0967	53.9136
33.0712	96.5017		19.8808	54.0137
4.85032	96.5639		34.7117	54.0609
152.625	97.0845		10.8986	54.1062
15.7542	97.3178		113.371	54.1493
13.3073	97.5562		40.4339	54.1621
61.105	97.7908		108.497	54.2483
27.4338	98.1029		57.1445	54.2574
21.7682	98.6652		21.0421	54.3004
92.9339	99.3544		21.1611	54.3007
11.0179	99.5906		103.267	54.3821
20.1061	100.007		13.9686	54.442
16.2011	100.433		27.0823	54.4737
9.94495	100.435		9.21763	54.6059
19.3834	100.464		101.234	54.6337
10.7765	100.594		20.9944	54.7291
10.8753	100.738		7.34226	54.7467
141.72	100.78		112.173	54.7601
37.8321	100.878		25.4571	54.8303
117.595	101.251		10.4437	54.9351
25.6215	101.992		4.69974	55.0937
20.2532	102.54		9.29526	55.2965
32.9719	102.692		113.755	55.3055
32.9657	102.697		16.6048	55.3978
16.7949	102.741		40.5356	55.4424
28.9147	103.244		76.2831	55.6076
147.58	103.295		34.4467	55.6424
43.7521	104.045		97.4377	55.7461
11.6547	104.075		24.2203	55.8711
11.7474	104.408		12.5967	55.8966
13.8947	104.472		101.792	56.0185
154.47	104.909		72.071	56.1973
139.657	105.998		16.1888	56.4412
121.66	106.273		8.2891	56.4591
46.4665	106.429		24.0882	56.5311
17.5104	106.62		133.498	56.5355
21.0714	106.914		15.6575	56.5798
17.5056	107.165		14.5335	56.5924
40.1955	107.315		18.82	56.6692
113.291	108.026		67.7312	56.7071
10.713	108.028		73.3754	56.8037
20.223	108.153		17.1413	56.842
55.6024	108.278		118.565	56.8472
9.27273	108.527		88.5836	57.0156
81.0561	109.192		26.6492	57.0669
86.6693	110.404		18.6328	57.1783
23.4505	110.49		133.624	57.2283
76.4573	111.328		53.9521	57.2927
118.664	111.449		12.8796	57.3516
11.7323	111.665		65.6898	57.4051
13.8462	112.408		8.25287	57.6758
7.62559	112.531		31.4327	57.6777
15.8613	112.572		146.583	57.724
13.6667	113.029		47.5567	57.8336
15.5016	113.515		134.179	57.8579
19.1739	113.835		16.7562	57.8904
179.886	113.871		8.95157	58.0291
13.5506	113.903		112.85	58.0304
15.6312	114.261		40.9169	58.1238
153.633	114.336		5.524	58.1307
30.7596	114.587		6.69892	58.334
10.3148	114.605		130.955	58.5446
15.1192	115.153		55.7448	58.5587
13.1208	115.443		50.4271	58.5875
33.192	115.463		88.0726	58.6924
129.738	115.581		18.125	58.7533
15.5672	115.748		71.3439	58.8074
79.0743	116.152		18.5544	58.8959
20.4071	116.775		121.369	58.9766
47.6939	116.964		8.75287	59.0361
138.829	117.22		127.21	59.3812
11.0588	117.395		114.096	59.4583
80.231	117.494		30.1164	59.4644
164.244	118.218		13.0787	59.5807
13.621	118.317		72.9965	59.8495
10.9721	118.556		60.239	59.8887
74.1062	118.658		146.727	59.9255
8.35787	119.157		111.085	59.9642
40.25	119.276		19.4134	59.9867
42.3081	119.29		44.1187	60.0378
157.049	119.482		3.80335	60.2691
26.0502	119.735		76.7454	60.3202
24.9813	119.867		163.405	60.6074
18.3864	120.576		16.0946	61.1182
11.9296	121.08		34.8254	61.5338
42.2449	121.315		174.296	61.6335
11.8196	121.392		43.1556	61.7337
34.4423	121.7		116.643	61.7562
116.683	121.778		72.7908	61.7584
19.9596	122.466		80.6129	61.8916
31.3805	123.22		90.3324	61.9171
8.64356	123.414		17.6793	62.0018
81.6168	123.669		167.311	62.0068
12.5729	124.216		62.0144	62.0252
174.364	124.575		14.0038	62.0936
35.445	125.026		33.2727	62.1855
130.045	125.512		54.054	62.4604
36.3472	125.856		34.8318	62.5358
42.6989	125.907		67.3848	62.561
13.5781	125.964		67.1244	62.6798
65.4485	126.351		13.361	62.7166
21.7307	126.403		10.0026	63.2611
24.7396	126.407		147.184	63.4558
18.1447	126.975		24.8812	63.5389
123.244	127.011		14.3407	63.6092
16.0782	127.117		86.125	63.8818
20.4432	127.469		21.3802	63.9421
90.6442	128.281		14.0459	64.1378
17.1189	128.76		15.677	64.1683
28.7609	128.847		58.0383	64.502
105.558	128.857		67.5377	64.5824
35.0475	129.541		43.3362	64.7648
50.059	129.918		175.039	64.7769
14.0566	130.27		126.83	64.856
74.5918	130.278		10.7463	64.9386
5.184	131.374		94.0532	65.0014
63.6684	131.393		108.897	65.0219
19.9018	132.023		19.6883	65.1157
7.37037	132.674		108.94	65.4273
25.5106	132.774		22.5868	65.4514
15.6414	132.793		30.8501	65.6209
15.2977	132.911		73.1287	65.9085
20.4587	132.922		30.8412	66.0997
38.7966	132.953		45.0806	66.3109
18.0576	133.254		94.4286	66.3211
4.35477	133.61		144.989	66.349
23.0493	133.895		65.66	66.959
36.5786	134.918		7.79515	67.1559
160.863	135.378		152.645	67.1885
145.951	135.52		86.5649	67.2456
54.5103	135.655		5.14419	67.5753
65.8214	136.054		109.997	68.1839
99.2241	136.296		19.7456	68.2873
65.1163	137.161		108.22	68.3829
14.6805	137.532		17.4763	68.6154
10.5497	139.453		13.8665	68.7256
15.1348	139.588		116.66	68.7503
11.0205	139.813		92.0946	69.1343
27.5193	140.024		63.4797	69.2467
36.2251	140.278		68.0638	69.3412
9.91333	140.321		13.6494	69.4041
21.0896	140.336		45.1318	69.5028
25.1735	140.931		90.0988	69.7706
95.6568	141.078		5.3662	69.8855
145.253	141.606		92.1725	70.4857
30.6368	141.662		71.5253	70.787
36.7692	142.436		53.8245	70.8622
38.6022	142.648		50.7798	70.9665
154.17	142.807		9.92105	71.073
14.0101	143.502		121.315	71.2193
39.273	144.312		60.6897	71.3307
60.4912	145.864		9.63198	71.4865
27.8155	146.098		15.9144	71.7612
17.8517	146.297		19.3111	71.8824
14.4918	146.414		15.5595	71.9767
19.3972	146.534		38.1667	72.2336
17.0027	147.173		9.46285	72.6501
19.3069	147.499		14.4651	73.0448
26.79	147.716		32.9909	73.2292
26.4577	148.592		13.1458	73.2525
12.4664	149.119		17.7188	73.4021
18.7419	149.147		71.9091	73.4465
19.8702	149.503		31.4981	73.4895
33.4218	150.335		25.5055	73.6548
13.7457	151.263		8.18462	73.7612
95.8006	151.403		12.1349	73.7806
12.2188	152.06		20.7951	73.9113
10.3852	153.256		62.7828	74.024
17.9498	153.368		20.4051	74.0872
49.2687	153.696		2.99273	74.2339
18.6014	153.93		7.44743	74.437
52.4015	154.584		29.2225	74.619
20.3381	154.9		31.4972	74.9079
83.0792	155.258		165.569	74.9726
63.5111	155.414		74.2071	75.465
44.5107	155.536		15.6442	75.4898
161.345	155.598		32.6416	75.6679
5.65428	156.093		47.0463	75.9246
11.0887	156.198		9.47124	75.945
28.2025	156.277		67.7562	76.2611
52.952	156.494		80.6839	76.4201
144.387	156.869		78.9408	76.4389
27.5788	157.115		115.975	76.5002
10.9576	157.808		80.8443	76.7899
33.8845	158.383		68.6502	76.8904
24.0554	159.107		4.95592	77.0753
9.62763	159.115		12.1285	77.6133
16.8581	159.127		36.3742	77.8574
46.4479	159.759		11.4955	77.9232
4.18433	161.811		4.95536	78.573
21.7891	161.933		56.8622	78.606
10.0396	162.094		35.8611	78.757
18.3661	163.829		21.9169	79.2496
178.898	164.72		65.1632	79.3644
153.13	164.788		101.1	79.4928
12.0936	169.777		98.0395	79.8369
23.3098	170.916		35.9154	80.1474
20.6177	171.969		76.0879	80.1498
144.107	172.069		52.2372	80.1689
22.753	172.725		22.4623	80.3444
83.5152	173.495		73.1065	80.4444
99.7059	174.085		16.8476	80.7769
31.9467	174.194		26.3346	80.9868
12.9531	174.991		83.2982	81.6968
12.9824	175.982		27.3543	82.0827
14.3926	176.103		79.9267	82.3712
167.992	177.927		11.1355	82.5496
64.5273	179.694		106.339	82.8687
29.348	180.266		118.448	83.2358
55.6913	181.198		6.58238	83.4235
66.11	181.238		69.7694	83.7087
56.2391	181.364		12.8559	84.0805
37.0466	182.543		48.0216	84.1484
6.19776	182.609		15.0983	84.278
24.8419	184.462		11.0529	84.8962
17.1129	186.162		9.32723	84.9234
17.9614	188.774		82.6357	85.0961
79.7211	188.793		58.7802	85.4332
165.016	189.22		79.3627	85.4438
9.07718	189.553		14.0773	85.4518
10.3443	189.709		9.65583	85.535
18.5483	193.002		65.7907	85.5477
9.90492	193.798		18.1927	85.568
91.117	193.912		55.8337	86.5941
22.4936	194.515		24.1689	86.9989
11.0075	194.642		22.2747	87.3232
12.0291	194.833		21.644	87.3774
17.2229	197.532		151.372	87.7056
43.346	200.99		10.1941	87.9252
89.4608	202.232		36.8272	88.0158
78.731	204.069		36.5949	88.0174
148.98	204.303		76.5192	88.2539
54.5833	208.324		16.2705	88.5182
41.3323	208.668		117.184	88.6364
7.38658	210.287		50.792	88.6906
60.8618	211.493		50.276	89.0215
24.7541	212.555		14.6203	89.5264
18.2043	214.739		53.8302	89.6417
121.849	216.474		49.6076	90.0768
4.05628	216.877		62.2907	90.1161
31.3142	218.512		9.00466	90.3955
11.2231	218.743		22.8544	90.5519
162.88	219.589		67.952	90.7692
42.6034	220.232		15.0986	91.3234
11.5037	231.702		24.1823	91.4215
133.828	235.562		16.4943	92.1511
60.6969	237.821		109.424	92.3992
19.2434	240.983		41.5509	92.8163
101.702	241.585		68.2822	92.9153
131.707	242.731		104.336	93.2741
32.7922	245.275		47.7724	93.3631
20.4317	246.169		6.91315	93.6788
46.1988	249.308		8.25616	93.9011
19.8663	252.846		4.97532	93.9767
20.5455	253.915		66.3611	94.0878
20.3169	254.111		68.038	94.3414
12.6697	254.809		66.4451	94.4618
20.4956	255.219		117.283	94.4936
151.596	255.544		10.8769	96.0637
14.4691	256.234		20.0716	96.2308
26.5569	256.891		85.4903	96.3143
15.9596	261.178		78.5798	96.4566
11.8031	265.503		80.7757	97.8022
68.4547	267.219		16.2619	98.2578
31.3048	273.889		52.8707	98.3788
46.2545	276.412		115.355	98.6827
42.7764	278.051		27.4622	98.7951
40.8498	305.16		7.83974	98.8707
5.62037	307.891		21.601	99.0087
35.8156	314.121		115.98	99.2995
34.0055	320.272		106.155	100.284
21.0859	328.406		37.6096	100.369
36.2799	331.416		119.899	100.927
131.841	338.111		11.8765	101.074
193.664	343.056		12.3791	101.547
48.9848	365.807		10.547	101.743
85.9489	378.831		63.7762	102.196
15.5374	451.803		68.8842	102.426
			53.3824	102.644
			20.1304	103.198
			17.814	103.312
			5.31915	103.703
			6.81265	104.059
			14.9437	104.082
			25.5195	104.435
			25.9134	104.643
			88.0636	105.368
			14.2417	105.585
			36.2395	105.678
			7.52442	105.787
			23.1575	106.014
			73.1394	106.392
			24.4439	106.61
			8.65849	107.23
			80.913	107.735
			10.9108	107.753
			39.1326	107.779
			16.4244	108.02
			12.1865	108.222
			11.4496	109.048
			44.0691	109.772
			39.938	110.84
			17.5131	110.911
			21.5096	111.086
			13.6102	111.353
			7.52228	111.513
			10.6697	111.892
			9.65941	112.025
			121.643	112.223
			15.2486	112.576
			61.3788	112.831
			20.68	113.013
			50.0463	113.028
			129.42	113.198
			62.6687	114.258
			40.5514	114.703
			162.818	114.884
			14.6667	115.166
			50.0969	115.533
			47.9609	116.012
			8.83036	116.097
			4.81329	116.693
			13.4618	117.035
			34.6082	117.652
			14.3319	118.808
			79.1879	118.862
			98.2971	119.339
			48.2863	119.356
			15.7466	119.633
			65.8056	120.316
			8.54502	120.319
			15.0404	120.417
			124.724	121.885
			18.1463	121.906
			23.9413	122.126
			23.5616	122.874
			15.0955	124.022
			12.9192	124.679
			13.5989	124.763
			27.6761	125.182
			10.6178	125.389
			38.6166	125.758
			85.3631	126.159
			45.1145	126.609
			30.5091	126.65
			12.4074	127.575
			16.9811	128.88
			67.5413	128.936
			12.1687	130.448
			11.0972	130.692
			9.25246	130.886
			20.9948	130.915
			111.7	131.193
			34.0086	131.359
			35.1136	131.805
			13.7854	132.09
			11.4223	132.436
			21.9621	132.682
			10.8584	132.886
			6.89734	133.161
			34.8163	133.182
			42.2929	135.292
			11.9282	135.324
			34.7718	136.094
			88.5385	137.914
			52.17	137.947
			17.5047	138.703
			13.2786	138.903
			9.50729	139.173
			86.2285	140.049
			10.2679	140.123
			10.1611	140.841
			3.17213	141.011
			18.8481	141.479
			76.0287	142.739
			10.4895	143.494
			52.7034	143.74
			17.5804	144.266
			112.219	145.182
			38.905	145.584
			32.441	146.366
			96.3696	146.475
			6.64407	149.057
			25.4102	149.175
			147.394	149.384
			26.4984	149.642
			66.1	149.889
			38.5549	149.993
			110.504	150.473
			9.95556	150.668
			89.7626	150.843
			81.4778	151.923
			51.5369	154.051
			13.8235	154.238
			76.0311	154.744
			20.9734	154.803
			15.5896	155.141
			77.1294	155.236
			11.6205	155.617
			5.95219	156.2
			39.8874	156.64
			52.9066	157.448
			9.08602	157.558
			69.7113	158.296
			18.0721	158.811
			23.4032	159.146
			13.4332	161.364
			25.8088	162.82
			13.2836	163.095
			10.2254	164.273
			11.2197	164.766
			43.308	166.342
			12.4105	166.59
			28.6527	168.022
			11.9926	168.275
			106.316	168.388
			13.2606	171.362
			149.628	171.501
			25.3952	172.131
			8.08148	173.789
			113.667	174.983
			4.4094	175.596
			61.4067	175.727
			89.9068	177.616
			11.2897	178.254
			8.02725	178.573
			12.629	178.914
			75.4627	180.127
			24.1337	181.729
			7.74747	183.118
			101.164	184.001
			7.3306	184.308
			12.3608	187.272
			38.7521	189.119
			22.9555	189.429
			57.8841	190.323
			12.9085	191.253
			37.8402	192.763
			44.0854	192.958
			11.0905	194.135
			12.798	194.26
			4.17595	197.147
			14.4074	197.503
			55.9392	197.908
			4.57635	199.606
			27.2517	203.119
			10.1797	203.313
			39.2259	203.657
			32.4527	203.932
			79.6904	205.528
			20.7893	206.637
			36.2808	212.917
			64.9332	213.502
			150.266	216.371
			16.8059	216.43
			24.1514	222.299
			43.7177	222.924
			27.8051	230.7
			11.28	232.22
			88.3972	232.278
			25.7692	234.291
			33.4056	234.581
			18.5382	236.508
			12.9055	237.847
			22.6888	237.993
			12.0556	238.831
			16.1154	240.18
			15.4968	241.486
			36.1015	242.538
			69.4969	246.624
			17.2593	246.785
			8.47059	247.115
			47.4839	247.791
			6.7709	248.74
			29.1082	254.821
			15.4611	262.62
			20.1513	263.142
			39.3994	264.225
			64.0651	267.06
			10.2286	278.531
			27.7149	281.727
			20.79	337.046
			5.24549	348.138
			5.42489	357.789
			10.7988	364.555
			18.0673	382.889
			8.9946	385.593
			7.84494	414.958
			10.7487	430.564
			16.2059	444.58

## Sheet: Donor 4
Well 1			Well 2			Infected cells
CPSF6	CA		CPSF6	CA		Non infected cells
43.2734	6.17007		6.39437	4.24651
22.8634	6.72956		50.4115	5.46667
4.89443	7.22515		4.19027	6.04803			CPSF6 mean	Mean infectivity (%)
17.9798	7.70968		42.7235	6.11468		NS control	101.21	7.73
5.86975	8.01255		27.5333	6.57709
35.4985	8.21166		14.3364	7.01553
20.3873	8.21404		24.4533	7.32018		K/D
28.4127	8.34601		21.1865	7.8738		Well	Mean CPSF6	CPSF6 left	K/D efficiency (%)	Infectivity (%)	KD:NS infectivity
12.728	8.58192		32.5043	7.88034		1	45.0882	44.5492	55.4508	3.87	0.500647
49.0071	8.91376		44.3128	7.93878		2	44.0214	43.4951	56.5049	5.03	0.650712
29.2102	9.03065		23.604	8.06275
14.7568	9.48204		23.9349	8.12108
8.25794	9.68504		45.5926	8.20648
10.5397	9.96942		36.7955	8.26697
41.1239	10.0747		16.6184	8.35422
93.0247	10.0885		27.6481	8.43556
5.60734	10.1032		40.7873	8.7026
39.6393	10.6227		15.9451	8.72692
19.7108	10.846		45.0171	8.72881
17.4722	10.8681		44.5547	9.05818
32.5714	10.9664		6.1401	9.10096
8.27004	11.0076		30.5865	9.16667
6.08471	11.1872		37.1085	9.25234
28.8919	11.2477		50.7488	9.26066
18.9124	11.2699		22.4151	9.30516
19.4825	11.4174		37.0627	9.3125
8.07292	11.4469		19.1686	9.31298
5.93727	11.5412		20.6087	9.32852
32.0277	11.6113		37.6748	9.39274
25.0031	11.6492		21.2222	9.4658
42.2046	11.7739		18.3286	9.49822
18.9305	11.7901		36.5448	9.5
19.7382	12.0533		31.1534	9.68786
22.193	12.1108		31.4067	9.77619
37.276	12.1323		18.5198	9.98045
21.9424	12.1596		55.9388	9.98311
22.1675	12.2895		30.6695	10.0375
20.9196	12.347		76.1304	10.0534
10.956	12.6101		39.3951	10.068
34.1718	12.6429		62.8138	10.0968
56.669	12.6628		60.2535	10.1384
26.8218	12.6752		43.516	10.1977
22.8214	12.6821		36.5355	10.2109
50.1318	12.7875		37.8491	10.2251
62.5298	12.9201		21.3008	10.2343
56.9758	12.9609		46.0261	10.2716
42.5037	12.9902		36.4141	10.2724
93.0674	13.014		45.106	10.3171
43.9053	13.065		41.4524	10.3692
31.9974	13.0726		30.469	10.3729
5.11151	13.0993		22.7109	10.3784
58.9917	13.1201		35.558	10.3906
31.2162	13.1579		42.7897	10.411
55.8784	13.2474		23.5113	10.461
20.7518	13.2715		49.75	10.4613
22.6899	13.3092		43.2593	10.4725
11.7842	13.4308		62.0977	10.5045
16.6176	13.4672		34.7062	10.5205
39.0909	13.4752		24.0537	10.5381
62.869	13.4828		18.3679	10.5467
16.1989	13.4938		5.59389	10.5649
18.1091	13.5565		41.2878	10.5689
46.0846	13.646		24.6154	10.619
32.6154	13.7098		14.1483	10.6216
60.8278	13.7524		27.0118	10.6619
16.4995	13.7614		42.492	10.7012
34.9631	13.7692		37.4172	10.7105
89.2014	13.8039		20.2587	10.7488
20.9818	13.8579		45.8921	10.7581
20.2197	13.8997		54.9405	10.7589
40.8254	13.9286		47.6496	10.766
52.298	13.9316		17.6995	10.7669
20.2548	13.943		28.67	10.8393
22.6242	13.9854		9.36364	10.8537
21.6849	14.0816		37.2249	10.8701
64.7443	14.1514		75.6073	10.9145
51.0463	14.1939		25.2673	10.9625
12.6507	14.2544		37.3055	10.9697
10.5276	14.2983		52.6977	11.0227
21.0549	14.3194		31.1394	11.0356
27.2522	14.4738		37.405	11.0672
53.4407	14.5159		30.5919	11.0723
18.0077	14.5634		10.0287	11.0772
25.3398	14.5782		46.1148	11.1024
70.2789	14.5893		30.6905	11.162
11.769	14.6174		36.5568	11.195
21.706	14.7401		45.4897	11.2371
47.2554	14.9882		29.9186	11.2735
19.206	15.0399		21.1049	11.2748
48.1573	15.0943		33.9238	11.3081
37.4805	15.1		13.5714	11.3429
27.0458	15.156		71.5473	11.4013
21.837	15.1843		33.7364	11.4227
47.6391	15.1903		15.8707	11.4255
35.4428	15.2425		22.4222	11.4479
73.8	15.3208		26.0765	11.4481
21.4313	15.3404		15.6119	11.4597
22.1725	15.3409		31.6456	11.4647
52.4482	15.3594		39.7054	11.4881
24.0836	15.3861		56.0182	11.5045
60.8546	15.3911		21.3383	11.5187
66.375	15.4196		85.1793	11.5516
115.467	15.4251		38.2817	11.563
40.6255	15.4919		41.851	11.5895
19.0498	15.5069		43.5556	11.5991
28.0909	15.539		36.6592	11.6201
54.8957	15.5664		18.4502	11.64
22.269	15.6616		5.28879	11.6667
68.1823	15.6649		35.141	11.6797
21.0881	15.692		41.4346	11.7209
47.0088	15.7308		29.9025	11.7311
32.5663	15.7509		16.3391	11.749
77.5902	15.8142		87.7368	11.7555
79.0886	15.826		23.9412	11.7792
38.3654	16.0293		11.4667	11.8009
9.49938	16.099		26.7075	11.824
51.5746	16.1079		26.3561	11.8704
4.97417	16.1119		42.4346	11.8862
72.641	16.1638		33.7015	11.895
13.1504	16.2141		8.41014	11.8957
44.195	16.2215		25.3551	11.9174
26.7193	16.2309		50.6879	11.9293
39.3222	16.259		53.8684	11.9404
46.5274	16.2715		42.9789	11.9456
38.6836	16.3312		38.6716	11.9469
25.3993	16.4066		22.2198	11.967
40.9511	16.4201		31.5302	11.9769
37.8201	16.5093		34.6233	11.991
55.845	16.5109		37.2241	11.9915
7.43802	16.5514		43.9878	11.992
23.9877	16.5752		32.0814	12.0359
35.6011	16.6526		41.3661	12.0364
61.5164	16.7074		48.7921	12.0429
35.5387	16.7359		26.7431	12.0431
65.7177	16.7681		36.0664	12.0558
18.8893	16.8469		9.98807	12.1038
19.7244	16.8821		45.0833	12.1131
7.41748	16.8924		45.1957	12.1362
17.5322	17.0078		29.4345	12.1812
16.3422	17.0105		44.3004	12.249
18.8671	17.044		41.845	12.2622
27.3035	17.069		11.216	12.2629
31.9278	17.1015		30.8275	12.276
30.3853	17.1174		41.4393	12.2841
23.2511	17.1953		80.4703	12.3125
19.5625	17.2148		32.5139	12.3889
74.6081	17.2272		9.66505	12.3894
35.499	17.2617		21.8746	12.3968
21.752	17.3487		41.8679	12.4073
80.6307	17.3625		76.8782	12.4106
38.6012	17.4009		21.5	12.416
28.7864	17.4074		19.3219	12.4177
12.8083	17.5828		45.4802	12.4286
37.6296	17.6271		22.475	12.4632
21.6749	17.7029		50.9142	12.4723
29.4012	17.7088		41.4732	12.4757
18.5036	17.732		39.0556	12.4806
32.2512	17.8386		60.7192	12.4852
17.2444	17.8571		42.5644	12.524
38.4183	17.8919		33.5255	12.5399
43.3448	17.8972		24.7478	12.5473
15.0119	17.9898		40.2986	12.5502
77.9764	17.9982		38.8853	12.5565
23.4051	18.1125		25.3272	12.5815
46.0751	18.2026		43.5973	12.5872
54.3246	18.2059		47.2255	12.5896
49.4034	18.2609		16.6149	12.5938
79.8389	18.3578		25.198	12.5969
18.4942	18.3638		46.5045	12.6104
34.3155	18.3694		42.6835	12.6121
68.4332	18.4332		11.8324	12.6152
10.8282	18.4689		75.1731	12.6405
39.1261	18.4854		32.9212	12.6465
4.42257	18.5417		57.4475	12.6587
33.1847	18.5904		50.5777	12.6869
21.6616	18.5928		36.867	12.7012
101.648	18.6212		36.1095	12.7105
46.3441	18.6254		50.6169	12.7153
43.3642	18.6625		18.0095	12.7171
33.3562	18.6775		42.8	12.7179
40.4035	18.7018		28.7136	12.732
42.9292	18.7405		47.5689	12.742
50.7514	18.7424		32.2222	12.7489
29.3131	18.7778		26.7454	12.7518
39.2721	18.7906		38.2445	12.7686
19.1749	18.7906		45.8499	12.7698
29.4355	18.7982		38.1785	12.7942
12.3715	18.8132		42.3498	12.8044
75.8233	18.8697		50.9714	12.8093
60.9364	18.8701		49.9438	12.8208
13.0183	18.8748		44.3773	12.8327
21.2951	18.9224		36.047	12.8406
27.4972	18.9597		28.4476	12.8408
10.6621	18.9599		96.8223	12.8818
39.1315	18.9645		89.503	12.9115
13.1912	19.064		34.9439	12.9441
72.75	19.0938		76.089	12.9688
61.8459	19.1375		69.34	12.9952
19.9188	19.2412		37.2906	13.0242
41.7893	19.243		34.1729	13.0243
21.6813	19.2686		39.7099	13.0375
32.0705	19.2938		17.9436	13.0632
87.816	19.3028		36.8032	13.0643
81.3895	19.3515		45.6195	13.0718
30.2039	19.4418		62.8076	13.0836
56.7468	19.4507		22.1425	13.0888
48.1274	19.4866		60.8891	13.105
12.4795	19.4975		21.24	13.1137
109.883	19.504		24.8831	13.1508
19.7011	19.5761		34.4396	13.1633
5.15238	19.5899		20.3884	13.1778
31.6487	19.6481		36.3312	13.1936
33.9397	19.6647		74.8273	13.2321
59.1442	19.6653		34.996	13.2341
36.6437	19.7143		44.216	13.2466
17.1889	19.7162		22.6443	13.2556
88.8483	19.756		10.4511	13.2845
38.1333	19.7788		25.1728	13.3079
60.3495	19.8085		28.6619	13.337
30.3743	19.8205		46.3321	13.3636
87.8545	19.8291		36.1094	13.3681
35.5706	19.8552		26.887	13.3692
37.6538	19.8977		5.59108	13.3743
58.4229	19.9281		62.9616	13.3824
94.2124	19.9475		25.513	13.4215
42.4118	19.9525		10.9736	13.4332
67.4368	19.964		39.6584	13.4406
60.0047	19.974		64.3086	13.4723
68.5659	19.9826		53.8845	13.4861
26.5058	19.9855		16.9534	13.4914
8.23011	20.004		37.9178	13.4921
8.78824	20.0417		81.8362	13.5167
85.9602	20.0543		46.0111	13.5174
29.2211	20.1859		50.2506	13.5231
41.7238	20.2065		50.048	13.5362
54.439	20.2703		51.9378	13.5434
25.643	20.2822		17.1286	13.5494
29.9117	20.2921		22.3458	13.5877
41.9167	20.2928		11.2581	13.5928
9.72803	20.2964		40.3106	13.6017
37.8641	20.2997		36.5871	13.6122
42.2414	20.3385		46.8124	13.6221
17.6352	20.3401		9.73267	13.6273
9.85896	20.3593		41.3254	13.6275
81.5603	20.372		45.3594	13.6291
33.6584	20.4439		44.1296	13.6339
35.8664	20.4511		66.0086	13.6458
25.0221	20.4783		62.5263	13.6493
22.3648	20.6039		47.5366	13.6505
73.6557	20.6221		63.137	13.6522
35.5	20.6288		35.4066	13.6611
38.8717	20.6703		33.1496	13.6766
12.0667	20.6708		43.2643	13.6864
40.1769	20.6813		11.7012	13.6882
10.309	20.6836		42.8889	13.6943
19.6936	20.6883		45.0625	13.7126
13.3667	20.712		58.0028	13.7222
45.9199	20.7331		49.9418	13.736
35.2347	20.7769		80.5502	13.7372
43.0137	20.7902		60.9934	13.7756
76.1586	20.7978		25.1599	13.7982
91.9239	20.8064		33.7702	13.8267
51.8299	20.8133		50.7011	13.8288
30.7847	20.8849		7.06198	13.8315
45.1024	20.9041		26.8185	13.8405
80.0997	20.9419		93.3671	13.8454
38.7877	20.9931		50.4107	13.8594
19.2533	21.0231		49.3816	13.8706
99.6509	21.048		28.7345	13.878
17.4541	21.0546		26.7611	13.8791
95.3697	21.0552		37.1151	13.893
16.8267	21.0763		71.4518	13.898
58.1478	21.087		11.3821	13.8991
16.7319	21.1084		37.9705	13.9
64.1992	21.1182		76.0899	13.9128
40.6464	21.1184		40.8933	13.9177
28.04	21.1775		57.8286	13.9233
26.1365	21.1992		35.0109	13.9401
30.9508	21.2186		49.5861	13.9424
41.8575	21.2245		50.1736	13.9451
26.7494	21.2275		38.9461	13.9517
40.6449	21.2473		36.014	13.954
43.3569	21.2711		55.6862	13.9565
35.413	21.315		35.2279	13.9755
18.462	21.327		46.588	14.0037
18.9488	21.3587		9.71144	14.0121
13.1941	21.3696		49.8204	14.0126
51.8845	21.3697		51.2287	14.0138
22.5062	21.3699		18.9027	14.0435
47.7737	21.3793		30.7023	14.0458
25.9657	21.3837		47.5815	14.0532
53.2098	21.3888		43.7156	14.1197
6.24057	21.4522		17.8561	14.1366
26.0592	21.4535		20.8795	14.1448
16.6253	21.4684		14.8367	14.1472
48.97	21.4721		44.9068	14.1556
32.376	21.4831		28.6373	14.1896
23.8362	21.511		72.1807	14.2167
45.0052	21.5373		16.6825	14.2259
23.7711	21.5527		48.5679	14.2383
84.7183	21.5606		64.0048	14.2417
24.9088	21.5767		24.2005	14.2545
27.3246	21.5854		9.69643	14.2582
12.1842	21.6263		21.4435	14.2884
72.9079	21.6741		44.2588	14.2939
86.1477	21.7032		80.4778	14.3415
37.657	21.7399		40.7561	14.3703
97.5352	21.7438		41.929	14.3758
21.9859	21.7582		33.981	14.3911
12.8123	21.7627		12.295	14.413
41.894	21.7894		37.1062	14.4242
69.507	21.8156		26.1757	14.4418
84.2101	21.8195		59.358	14.4668
69.1444	21.828		35.6426	14.4733
20.2494	21.8353		32.6916	14.4773
67.5369	21.8595		15.797	14.4867
40.6998	21.8641		95.4695	14.5236
20.6014	21.875		77.5996	14.5394
60.7799	21.8758		73.3691	14.5458
67.6728	21.8803		29.1987	14.554
70.5065	21.902		48.2564	14.5591
37.5291	21.9158		36.8032	14.5843
28.712	21.9185		103.267	14.5942
14.4719	21.9257		62.7366	14.5957
44.351	21.9294		29.533	14.6096
77.4078	21.9329		25.026	14.623
28.3446	21.9445		67.9718	14.6355
40.029	21.9625		19.5315	14.6463
47.3245	21.9715		47.3077	14.6599
24.8102	21.9748		15.0207	14.6785
52.6075	21.9855		24.2688	14.6868
16.4799	21.9945		45.8179	14.6889
54.0605	22.0527		28.3705	14.697
33.5798	22.0543		18.4017	14.6992
70.273	22.0573		43.8826	14.7231
11.1271	22.0643		27.4152	14.7279
64.2604	22.0655		25.112	14.7315
72.1423	22.0689		48.5911	14.7324
3.17157	22.0775		32.4312	14.7327
20.6923	22.0961		19.865	14.7464
32.79	22.1016		41.1435	14.7523
19.3839	22.119		56.7313	14.7644
5.23651	22.1364		31.4926	14.7679
27.3478	22.184		37.6739	14.7842
32.4298	22.1859		59.277	14.792
51.5118	22.1921		24.715	14.7969
28.3596	22.2019		57.6966	14.7992
32.4481	22.2037		23.43	14.803
57.1502	22.2261		31.1389	14.809
17.5693	22.2295		43.0408	14.8244
53.5786	22.2393		24.3011	14.828
24.9903	22.2806		38.5743	14.8339
109.818	22.2892		36.4792	14.8364
37.7976	22.2959		27.5569	14.8367
60.3407	22.3109		58.3532	14.8386
20.2096	22.3198		37.1116	14.8544
27.0727	22.3272		35.9544	14.8597
18.3326	22.3503		37.4299	14.8689
38.8004	22.359		50.7746	14.8991
27.6076	22.3745		31.2154	14.912
51.501	22.3788		53.7229	14.9238
55.8533	22.3869		43.0066	14.9281
45.1496	22.4008		61.0367	14.9284
20.5075	22.4405		5.68989	14.9325
16.3838	22.4511		11.4217	14.9409
28.3172	22.4559		34.8635	14.9479
52.6818	22.499		52.6681	14.9701
46.2899	22.5		38.3077	14.9797
95.3623	22.5052		48.1376	15.0058
39.9378	22.5293		50.8918	15.0233
94.0461	22.5335		49.3963	15.0275
74.3941	22.5364		30.6374	15.0441
55.928	22.5803		83.8529	15.047
39.336	22.5909		40.893	15.0508
8.8018	22.5929		49.7831	15.0539
15.5804	22.5986		34.7504	15.0718
46.0878	22.6268		37.604	15.0866
76.0082	22.6447		56.6027	15.0879
45.803	22.6476		64.6889	15.1003
26.7011	22.6482		27.6301	15.1007
50.6654	22.6526		59.8089	15.1068
18.9262	22.6777		43.125	15.1115
40.3038	22.6787		32.597	15.1279
39.5158	22.6835		45.2964	15.1286
42.699	22.6908		35.5225	15.1361
25.2886	22.7081		34.858	15.1425
61.7937	22.7376		24.1972	15.1587
40.7476	22.74		20.5864	15.1627
65.6253	22.7514		52.8293	15.1636
62.1911	22.7651		38.9403	15.1667
41.0107	22.7715		37.7965	15.1679
30.3615	22.78		32.9545	15.1765
11.3987	22.7887		21.1492	15.1848
67.9514	22.8258		54.625	15.2021
31.0453	22.8307		24.779	15.2119
29.1807	22.834		43.5809	15.2297
33.1694	22.8347		39.0451	15.2632
25.5882	22.8353		49.0344	15.2711
21.4034	22.8499		6.87101	15.2756
13.1259	22.8557		32.6725	15.2797
122.701	22.8686		45.3107	15.3019
92.8427	22.9043		9.01415	15.3096
43.0826	22.9134		33.7602	15.3104
97.9551	22.9234		85.6851	15.3235
46.068	22.9584		51.4311	15.3308
73.598	22.9589		37.44	15.3333
62.814	22.9611		39.875	15.3522
35.7631	22.9862		53.9707	15.3524
48.8639	22.9945		66.3294	15.3557
88.9975	23.0617		43.835	15.3564
33.2293	23.0631		48.0409	15.3692
38.5122	23.0756		14.674	15.3692
22.3412	23.0824		16.5109	15.3746
45.5471	23.0864		5.4	15.3841
16.1284	23.1051		50.9482	15.3889
36.0194	23.1108		87.9446	15.3897
86.7088	23.1121		41.1974	15.391
59.7277	23.1646		32.2063	15.4
85.933	23.1791		34.3538	15.4063
26.2315	23.1857		59.5109	15.4111
83.4758	23.2031		19.3446	15.4213
33.4753	23.2171		80.8344	15.4227
32.8441	23.2614		65.7033	15.4528
39.4381	23.2699		40.8706	15.4531
27.805	23.2765		14.2305	15.4562
52.4935	23.3008		46.3217	15.4635
58.4408	23.3145		90.9639	15.4675
28.4672	23.3999		55.0975	15.4792
39.3818	23.4284		29.9976	15.4806
30.3982	23.4286		27.8594	15.4898
109.712	23.4482		66.0762	15.4931
23.4082	23.4616		68.7737	15.4976
46.2026	23.484		4.92236	15.5168
23.8991	23.4971		41.3806	15.5265
60.1277	23.5245		62.119	15.533
58.8004	23.5674		46.9585	15.5377
61.4	23.5897		33.0088	15.5401
20.2143	23.59		34.0648	15.5434
43.1156	23.5927		55.5942	15.5437
39.3007	23.6029		21.6103	15.5472
46.1176	23.628		39.2372	15.5648
37.431	23.6406		37.9204	15.5694
28.9535	23.6459		46.3275	15.6035
14.8449	23.646		31.2172	15.6318
33.9315	23.6477		13.634	15.6332
17.0876	23.6517		18.1791	15.6381
44.5203	23.675		40.3505	15.6408
3.5049	23.6759		49.4739	15.6429
15.9722	23.7006		43.6757	15.6452
49.7822	23.7065		37.2222	15.6483
44.7513	23.721		45.7628	15.6534
45.5869	23.7393		19.8429	15.6537
75.1085	23.74		62.6096	15.659
65.537	23.7424		19.3449	15.6882
52.7278	23.7529		24.1079	15.6895
82.2439	23.7639		47.2141	15.7
40.4669	23.7797		48.3724	15.7167
59.7829	23.8196		36.904	15.7172
43.4044	23.831		37.2727	15.7174
68.1362	23.8681		45.8471	15.7274
56.4093	23.8786		13.4644	15.7298
85.9958	23.8901		23.8104	15.7459
79.9607	23.9085		59.6466	15.7558
10.6135	23.9104		49.11	15.767
22.0261	23.9136		45.9309	15.772
34.3208	23.915		17.7047	15.7724
101.242	23.9505		25.3758	15.783
60.0826	23.953		45.5351	15.7857
52.7828	23.9671		72.3709	15.7996
47.8768	23.9727		47.9023	15.8071
69.6719	24.0076		54.2932	15.8141
58.1689	24.02		83.5552	15.8166
22.821	24.0203		48.2938	15.8258
53.8063	24.0227		43.2415	15.8344
58.49	24.0594		46.3354	15.8419
77.3216	24.0667		21.2598	15.8609
116.828	24.0724		37.058	15.8695
77.2462	24.0792		44.392	15.8753
23.974	24.1146		92.6302	15.8948
21.1351	24.1497		84.9976	15.9085
37.4506	24.1596		62	15.9118
33.8685	24.1679		91.6322	15.9231
44.3674	24.1721		30.1111	15.9231
7.34826	24.1925		36.5762	15.9263
40.1261	24.1944		56.7868	15.9345
14.2333	24.1967		42.5531	15.943
43.3158	24.1988		17.3205	15.9575
22.4773	24.1997		47.4479	15.9589
47.5889	24.2221		49.79	15.9597
61.1723	24.2386		45.9971	15.9651
53.113	24.2435		40.0191	15.9679
106.779	24.2751		78.7925	15.9723
27.7314	24.3349		38.8167	15.9739
49.5875	24.3428		15.8082	15.9878
35.7326	24.3441		25.9681	15.9945
35.523	24.3452		29.6	15.9954
45.0159	24.3544		48.8523	16.0086
53.8005	24.3949		43.0847	16.015
6.9122	24.4107		48.4557	16.0323
20.0186	24.4183		32.2168	16.0435
4.00779	24.4298		32.5484	16.0455
38.18	24.4325		35.8586	16.047
27	24.4392		33.4378	16.0516
22.7324	24.4766		35.3054	16.054
66.5828	24.4973		21.9927	16.055
25.173	24.501		27.9458	16.069
93.9976	24.5248		34.0204	16.0855
24.831	24.5446		12.0987	16.0859
17.2396	24.5584		59.6504	16.0936
67.0246	24.5598		43.0048	16.1039
45.7034	24.5909		50.9282	16.1099
38.8381	24.5946		87.4905	16.1129
24.1531	24.6002		20.886	16.1168
26.9714	24.6258		77.241	16.1418
32.3786	24.6279		60.2069	16.1556
15.2512	24.6324		26.0849	16.1651
34.1073	24.6497		35.5498	16.1664
26.4089	24.6563		29.8744	16.1869
11	24.6755		67.1848	16.1951
63.6958	24.6954		74.9555	16.2063
37.346	24.6998		18.8204	16.2322
48.7664	24.7016		27.3906	16.2328
31.6117	24.7156		35.1079	16.2407
57.8967	24.7213		43.3663	16.2427
51.7136	24.7363		35.407	16.2546
27.873	24.7645		46.1595	16.2684
35.8821	24.7718		48.3529	16.2757
25.7558	24.7738		48.312	16.2981
66.037	24.7898		90.2181	16.3354
26.0374	24.8084		52.7539	16.3415
45.3775	24.8125		4.70472	16.3445
58.9504	24.8409		55.7181	16.408
54.3367	24.8466		30.7546	16.4116
68.7648	24.8484		72.8581	16.4182
49.2876	24.8698		27.1567	16.4348
72.2647	24.8782		8.25911	16.4525
91.6615	24.8848		30.5595	16.4538
14.4016	24.8935		51.7882	16.4732
23.7328	24.8997		36.8831	16.4784
33.9021	24.9231		77.6225	16.4843
173.63	24.9252		47.5847	16.4876
43.5972	24.9356		52.6788	16.5
4.31	24.9656		39.2871	16.5161
32.3605	24.97		43.7786	16.5235
45.5665	24.9882		29.4898	16.5241
45.8913	25.0096		32.4271	16.5284
21.0634	25.0324		17.2141	16.5419
70.268	25.0414		54.3122	16.5446
57.0245	25.0444		13.8889	16.5501
38.6417	25.0463		19.4019	16.5524
90.0623	25.0636		32.2394	16.5573
44.9863	25.0763		42.9664	16.5739
39.8095	25.0859		17.5195	16.5838
94.5166	25.0873		33.544	16.6017
56.0519	25.0948		9.13084	16.6402
32.8506	25.0964		22.3342	16.6471
19.1351	25.1051		28.825	16.6719
47.217	25.1293		39.6912	16.6755
42.0534	25.1378		36	16.6837
45.0792	25.1433		26.7146	16.6883
25.7105	25.1439		29.4434	16.6896
44.1943	25.1608		13.4793	16.7004
65.0097	25.1741		29.1027	16.7137
19.3861	25.1777		35.0576	16.7204
32.3529	25.1808		32.7748	16.7424
26.064	25.1936		60.2059	16.7618
16.6892	25.1958		32.1445	16.7747
28.6179	25.2526		35.533	16.778
21.2137	25.2718		26.3189	16.7793
28.3441	25.276		78.4405	16.7887
36.2312	25.3289		41.1393	16.7931
23.7985	25.3302		56.5501	16.8103
29.7119	25.4029		26.2661	16.8149
77.5262	25.405		34.2607	16.8283
133.845	25.4059		33.7784	16.8354
23.5783	25.4368		48.7282	16.8389
21.462	25.4372		46.5329	16.8418
14.7904	25.4436		34.1496	16.8497
28.69	25.4703		13.32	16.8529
57.4391	25.4776		41.7821	16.8582
43.8855	25.4788		51.1937	16.8582
91.481	25.481		45.027	16.8636
68.5988	25.4887		31.6175	16.8701
39.1116	25.4901		48.2257	16.8803
42.3688	25.4952		39.8757	16.8808
116.11	25.5037		43.5088	16.8963
83.2147	25.5144		35.069	16.9094
46.556	25.5367		19.9661	16.9152
36.1339	25.5557		38.8806	16.9499
84.74	25.5584		37.6295	16.9531
21.3617	25.5647		13.8304	16.9545
5.51386	25.5689		80.9106	16.9684
79.7467	25.5831		13	16.978
87.5298	25.5865		46.861	16.9823
54.7862	25.5914		43.5052	16.9975
33.8151	25.6006		77.8293	16.9976
9.55344	25.6108		53.478	17.0126
11.6826	25.6144		88.4745	17.0213
25.6493	25.6234		21.9616	17.0267
72.5778	25.6672		14.0734	17.0346
5.38889	25.6999		54.8707	17.0415
23.3422	25.7064		80.5813	17.0668
19.5866	25.7198		118.913	17.0751
38.6151	25.7415		47.1393	17.0774
16.2618	25.7509		38.2456	17.082
52.3513	25.7528		65.1541	17.0889
20.291	25.7565		27.5814	17.0951
128.067	25.7786		79.8059	17.1164
57.5377	25.7809		32.1667	17.1185
25.0194	25.7924		37.6416	17.1241
35.7398	25.793		24.0779	17.1287
73.594	25.8096		48.7143	17.1296
41.146	25.8177		59.0685	17.1454
12.9131	25.82		56.7848	17.1487
23.6906	25.8226		20.829	17.1632
56.6533	25.8365		53.4795	17.1731
26.1991	25.8533		21.892	17.1763
100.135	25.8563		84.4829	17.1799
47.4123	25.8577		47.1648	17.1864
15.2476	25.8754		19.725	17.1875
53.7293	25.8765		38.8767	17.2063
23.1591	25.8831		47.2629	17.2148
58.6365	25.9055		93.9589	17.2212
44.8529	25.9254		47.7594	17.2798
53.4453	25.9367		65.0636	17.281
54.8105	25.9635		42.9955	17.2894
60.6411	25.9644		53.0609	17.2931
47.8562	25.9731		19.8177	17.2987
66.4705	25.9824		58.5995	17.3085
17.0292	25.9918		30.7362	17.3109
117.808	26.0026		33.9665	17.3166
60.1056	26.0029		64.906	17.3357
44.3441	26.0152		62.8102	17.3402
25.7586	26.0209		25.7679	17.3403
12.2059	26.0304		13.4986	17.3425
87.7422	26.0372		52.5718	17.3473
67.3447	26.0452		38.8287	17.3602
6.7799	26.0493		33.4653	17.3698
27.6793	26.0607		96.9603	17.3768
101.244	26.0777		9.72	17.3773
50.7879	26.1003		69.6984	17.3931
44.4484	26.1135		105.377	17.3946
81.6628	26.1213		40.8067	17.4048
77.0024	26.1215		46.6182	17.4161
23.5963	26.1264		51.4816	17.4227
76.153	26.1443		37.5405	17.4342
43.4668	26.1594		23.6081	17.4363
156.185	26.1813		28.6031	17.4412
37.8516	26.2051		37.3	17.4422
81.613	26.2213		35.37	17.4479
12.4938	26.2336		37.0705	17.4657
82.553	26.2695		36.7091	17.4672
64.6233	26.2741		60.053	17.4754
32.8767	26.2753		69.2217	17.4762
14.7263	26.2806		63.7773	17.4812
29.8917	26.2974		22.0329	17.5201
29.7213	26.3146		52.7649	17.5414
29.3195	26.3151		75.5924	17.5511
51.8876	26.3182		47.751	17.5559
29.003	26.3203		68.2787	17.5562
35.8574	26.321		49.6361	17.5569
73.9523	26.337		51.2468	17.5574
79.705	26.344		44.0123	17.5722
14.6652	26.3477		44.6823	17.5778
14.9588	26.3524		40.3094	17.5779
26.7754	26.3576		40.0465	17.5903
31.7064	26.3748		20.8878	17.6183
40.5744	26.3857		36.8304	17.622
31.1376	26.4136		62.3019	17.6342
63.3289	26.4169		42.7332	17.6436
6.4368	26.4243		31.1656	17.6657
81.6247	26.4412		11.0302	17.6979
46.4136	26.4456		86.1693	17.7223
91.2781	26.4808		93.5057	17.7346
14.3602	26.4903		45.2698	17.7386
23.8684	26.4911		29.3867	17.7398
9.14	26.4933		78.0957	17.7481
6.32627	26.4933		14.9735	17.7533
53.7297	26.501		84.3653	17.7562
54.5794	26.5158		118.384	17.773
75.1549	26.5193		13.4463	17.8067
88.7149	26.5243		15.6	17.8094
80.7173	26.5249		15.1577	17.8124
18.1347	26.5286		33.6169	17.8156
35.4236	26.5364		34.2028	17.8197
37.1209	26.5446		43.6438	17.8222
47.3757	26.5477		18.2368	17.8287
52.1344	26.5573		46.3489	17.8356
85.4714	26.5818		46.634	17.8391
45.7348	26.6102		14.1384	17.8421
53.632	26.6261		49.6114	17.8426
55.9966	26.6358		45.7257	17.8538
87.7363	26.6382		108.538	17.8567
5.04437	26.654		64.7157	17.8568
82.9544	26.6559		43.5335	17.8674
16.1975	26.6919		85	17.8729
24.4195	26.7083		40.6114	17.8814
26.0476	26.7277		42.4758	17.8937
64.1529	26.7388		39.1885	17.8941
39.8274	26.7417		44.1741	17.9167
45.4446	26.7443		41.0685	17.9298
25.8084	26.7616		85.9305	17.9308
17.341	26.7704		24.2461	17.9327
25.5779	26.784		62.7506	17.9471
79.348	26.8033		88.8993	17.9473
12.4619	26.8035		23.0178	17.9507
83.8607	26.8223		28.9345	17.9781
29.5265	26.8334		98.0386	17.9972
60.814	26.8681		31.1429	18
15.6916	26.89		17.0864	18.0035
7.08898	26.9132		44.5675	18.0119
90.5948	26.9223		70.8424	18.0148
53.5296	26.9298		42.4348	18.0243
57.293	26.948		19.3979	18.0366
42.9486	26.9505		34.4441	18.0419
24.0579	26.9592		31.1564	18.0432
59.4204	26.9729		20.125	18.0496
19.5285	26.9793		18.9191	18.0516
23.1986	26.9821		36.2271	18.0576
94.1961	26.9889		47.9957	18.0985
17.1036	26.9907		32.0078	18.1028
68.9974	27.0105		27.4937	18.1037
11.4621	27.0427		20.8128	18.1056
70.4234	27.0431		45.5235	18.1065
73.4484	27.0625		44.3171	18.1066
48.8893	27.0638		39.1708	18.1194
88.0708	27.0776		62.0873	18.1445
4.7563	27.1111		43.7368	18.1563
26.728	27.1148		36.2808	18.1581
73.7018	27.1284		64.7865	18.1875
59.9702	27.1323		46.4043	18.193
52.5909	27.1835		29.2772	18.1962
59.4828	27.1847		26.4038	18.2037
90.2384	27.1947		39.3895	18.2096
40.3661	27.2059		28.4957	18.221
42.165	27.2126		75.8318	18.2256
37.3157	27.243		25.0346	18.2276
41.2008	27.2494		36.8413	18.2463
18.7562	27.257		21.2096	18.25
94.9886	27.2818		124.694	18.2646
27.8776	27.2832		50.0385	18.2695
18.8473	27.2906		54.761	18.273
86.645	27.3098		44.8443	18.2818
81.7514	27.3197		20.9351	18.3034
83.4015	27.3307		15.9866	18.3064
37.8539	27.3309		42.5906	18.3103
90.3145	27.3416		100.139	18.3159
27.6334	27.3582		42.7676	18.3264
43.5913	27.3747		56.3415	18.3283
26.0142	27.3805		17.2865	18.3296
43.282	27.381		50.2422	18.3354
59.9114	27.4146		71.6224	18.3441
5.10646	27.4224		13.0934	18.3562
25.6581	27.4232		72.2857	18.3792
48.287	27.4327		21.2808	18.3877
57.6934	27.4624		43.5736	18.3887
15.9703	27.4638		47.873	18.4
70.4758	27.4953		61.4802	18.412
21.75	27.5166		19.4376	18.4242
32.3905	27.5244		26.195	18.4317
35.3433	27.5263		12.3438	18.4372
80.5918	27.5311		54.4612	18.4425
49.0048	27.5898		19.0455	18.4426
114.836	27.6		37.3515	18.4585
17.3982	27.6321		22.2139	18.4607
22.4874	27.6612		28.1785	18.4815
46.1636	27.6618		21.0769	18.4965
29.3304	27.6651		38.8141	18.501
61.2627	27.6814		39.5768	18.5015
43.918	27.7059		51.5198	18.5031
15.1039	27.7241		92.5253	18.5044
24.7791	27.7333		86.5397	18.5131
26.6382	27.7435		83.5635	18.5193
16.557	27.7441		76.2605	18.5214
43.7511	27.7585		45.0238	18.5246
75.8037	27.7586		56.1883	18.531
98.515	27.7737		69.814	18.5313
24.6462	27.7942		55.627	18.5321
21.483	27.8618		43.9318	18.5365
56.3705	27.8641		36.4771	18.5429
109.59	27.8657		13.3008	18.5512
44.4986	27.8817		107.487	18.5517
34.7335	27.8835		71.0266	18.5666
42.3746	27.8851		40.5801	18.5683
77.8924	27.887		20.4973	18.5683
31.4182	27.9007		67.0966	18.582
29.5853	27.9066		24.5954	18.598
81.4575	27.9164		64.2021	18.5985
10.3133	27.9301		23.8994	18.6011
70.412	27.9315		35.132	18.6022
5.9009	27.9336		43.1462	18.61
102.15	27.9362		37.1143	18.6317
85.6313	27.9475		43.5901	18.6397
60.5864	27.9504		52.9649	18.6651
63.8976	27.9517		91.148	18.6688
39.8049	27.9602		34.2263	18.6689
102.609	27.9642		7.40806	18.67
15.3197	27.973		41.3869	18.6716
16.5577	27.9743		28.1634	18.6742
101.327	27.9873		53.4186	18.6815
42.5424	27.999		28.679	18.7014
12.4883	28.0022		17.9709	18.7028
38.2363	28.0067		28.954	18.7082
30.0022	28.0148		56.8977	18.7084
20.4319	28.022		10.6474	18.7271
14.0953	28.0271		14.9169	18.73
117.482	28.0613		43.5699	18.7313
27.694	28.0617		21.2407	18.7352
106.26	28.0622		39.6131	18.737
23.2201	28.0735		31.7627	18.7468
65.0332	28.0761		22.8784	18.7547
45.941	28.0772		19.832	18.7591
37.2008	28.1038		53.2222	18.7662
64.9133	28.1158		47.9956	18.7741
81.0756	28.1427		28.2339	18.7964
28.7478	28.1493		18.4428	18.7985
26.0436	28.1589		38.3418	18.8243
23.3533	28.1598		55.7454	18.828
18.0091	28.1837		79.6273	18.8405
32.1464	28.2059		36.8732	18.8405
60.7471	28.2111		24.9247	18.8427
38.3516	28.2134		64.3094	18.846
80.3459	28.2195		47.878	18.8468
22.3009	28.233		20.5317	18.8496
54.7857	28.2565		39.6571	18.8544
35.651	28.2628		34.3419	18.8614
83.5777	28.278		16.0719	18.8663
61.7467	28.2941		27.5828	18.8726
32.2314	28.2948		64.2846	18.8744
19.3118	28.3023		79.7615	18.875
34.7214	28.3168		82.9138	18.8896
40.9478	28.3318		20.0297	18.8936
17.242	28.3346		24.7872	18.8973
4.64211	28.3431		36.1359	18.9057
19.7138	28.401		53.3629	18.9103
85.2785	28.4021		35.7319	18.9122
23.3077	28.4275		78.0738	18.9128
43.0616	28.4826		45.5244	18.9248
99.5221	28.4848		29.76	18.9294
33.0146	28.4907		89.9481	18.9326
36.0934	28.5065		25.4174	18.9359
38.6143	28.5073		24.0099	18.9404
24.8339	28.5152		20.2938	18.9406
20.6279	28.516		9.69505	18.9485
4.2217	28.5925		24.85	18.9512
58.0705	28.5988		27.3468	18.9536
17.7984	28.5999		78.3333	18.9541
44.8099	28.6032		103.206	18.9656
32.3842	28.6041		82.3881	18.9713
58.5329	28.6065		59.1714	18.9727
42.2366	28.6226		31.7644	18.9843
18.6692	28.6403		14.5543	18.9868
67.0576	28.68		96.0492	18.9876
82.1374	28.6852		21.9641	18.9929
70.693	28.7488		96.8038	19.0021
97.1796	28.7512		43.409	19.0087
56.9329	28.7829		63.0929	19.0115
91.3774	28.7897		67.6685	19.0133
20.4258	28.7963		59.4047	19.0141
112.34	28.7967		35.1481	19.0158
49.9355	28.8226		5.89398	19.0305
30.9286	28.8243		48.2091	19.0364
35.7342	28.8284		51.9563	19.0369
27.1777	28.8388		20.2057	19.0403
54.0968	28.8454		39.8097	19.0431
8.89116	28.8879		51.6885	19.0454
36.7522	28.8997		42.3832	19.0509
40.3708	28.9062		49.6184	19.0571
66.6926	28.9073		19.6799	19.0629
38.939	28.9119		31.1013	19.0931
32.2981	28.9227		37.1451	19.0933
61.5348	28.9241		28.8114	19.1032
11.5491	28.9402		18.8275	19.1053
78.666	28.9485		83.9886	19.1175
21.2448	28.9499		9.49624	19.1328
90.2015	29.0385		36.6276	19.1355
43.9681	29.0408		46.9221	19.1365
73.9543	29.0907		69.3141	19.1432
32.0326	29.1042		27.3175	19.147
18.1795	29.108		64.7729	19.1596
47.323	29.1259		43.3785	19.1604
79.4008	29.1372		71.411	19.1731
29.7463	29.1431		60.1371	19.187
54.5305	29.1455		85.2619	19.1894
55.5975	29.1527		58.6095	19.1989
39.2852	29.1823		44.479	19.2008
64.5708	29.1847		34.0532	19.2035
16.4615	29.2259		48.2468	19.2045
67.5815	29.2364		77.2922	19.2098
76.4737	29.2527		28.1672	19.2255
9.78851	29.2589		46.9474	19.2376
49.6092	29.2685		50.9858	19.2554
92.6386	29.2789		61.6246	19.2583
45.6496	29.2887		75.5791	19.2731
58.1772	29.2922		46.89	19.2765
93.3995	29.3571		44.8489	19.2785
23.9323	29.3756		41.2434	19.2788
30.338	29.3953		40.8205	19.2813
32.2535	29.4083		33.177	19.2911
16.9302	29.4222		67.3523	19.3012
92.0638	29.4289		53.2781	19.3094
58.6921	29.4515		46.7551	19.3136
92.9235	29.4626		88.1872	19.3136
33.5639	29.4628		12.44	19.3211
59.8799	29.4703		36.8684	19.3254
65.2908	29.4824		22.1746	19.3389
48.9917	29.4856		88.093	19.3457
76.491	29.5009		21.1392	19.3525
44.843	29.5185		20.6206	19.3573
56.8806	29.5304		53.7865	19.3645
48.5336	29.5365		18.1456	19.3698
10.0815	29.5577		20.4164	19.3841
96.1271	29.5651		27.5558	19.4133
86.9426	29.5745		22.1409	19.4272
44.25	29.5908		42.5482	19.4313
26.6079	29.6148		40.3038	19.4534
20.0758	29.6296		20.6881	19.4548
57.8343	29.6522		46.2145	19.464
103.068	29.6825		5.29843	19.4804
39.7545	29.6898		14.8304	19.4867
72.9137	29.7075		51.7525	19.4938
5.61379	29.7143		23.0445	19.4939
71.4234	29.7287		69.7558	19.4963
68.2847	29.7636		75.5395	19.5
50.8333	29.771		12.9495	19.5015
99.9613	29.7907		61.7787	19.5023
56.0461	29.8216		30.5571	19.5061
95.2822	29.8316		44.8211	19.5066
37.0168	29.9347		16.2267	19.5155
20.866	29.9407		103.871	19.5231
18.9719	29.9594		73.8065	19.5295
99.513	29.9598		78.6436	19.5345
52.6132	29.985		36.4	19.5558
64.3026	29.9861		44.8799	19.5579
17.1453	29.9958		35.2889	19.5585
28.176	29.9975		40.0545	19.5667
26.5486	30.0019		64.6101	19.5772
95.8168	30.014		49.0136	19.5926
11.9519	30.0142		8.56203	19.5932
34.2859	30.0232		14.159	19.602
6.44032	30.0256		7.31742	19.6081
58.3875	30.0292		15.4638	19.6123
11.4571	30.0295		74.6729	19.6204
73.3013	30.0327		45.376	19.6303
59.5311	30.0377		56.1365	19.6372
29.3256	30.057		32.9821	19.665
9.63299	30.0704		32.7005	19.6675
6.57767	30.0731		29.6364	19.6753
80.6021	30.0885		28.6262	19.6869
42.0607	30.1002		33.0859	19.6887
17.3724	30.1028		21.9401	19.7057
51.8715	30.1051		8.16176	19.7075
58.1192	30.1083		13.3134	19.7131
36.7519	30.1146		45.6533	19.7161
39.2756	30.1258		64.5517	19.7181
42.009	30.1622		25.945	19.7223
71.7427	30.1699		46.1991	19.724
25.7074	30.2116		36.6124	19.7277
57.4767	30.2144		104.95	19.7285
19.6012	30.2302		84.588	19.7314
7.00273	30.2602		110.496	19.7332
59.49	30.2634		60.0395	19.7349
16.7324	30.2717		48.835	19.7398
35.0248	30.3016		48.9467	19.7516
134.217	30.3536		52.9032	19.752
18.0812	30.4139		70.5757	19.7528
44.4326	30.4305		12.7701	19.7548
38.5096	30.4972		49.6978	19.7567
34.67	30.5112		33.1792	19.7669
92.5364	30.518		24.3358	19.7756
57.4484	30.5198		15.0279	19.7845
27.3768	30.5434		55.1754	19.7864
51.83	30.5546		23.9469	19.7905
27.024	30.5547		31.3792	19.7914
43.6653	30.5891		57.7202	19.7935
33.7686	30.6141		42.669	19.7942
69.0609	30.6184		36.4	19.8018
54.9669	30.6397		17.1268	19.8033
74.1395	30.6502		37.5263	19.8075
44.8273	30.6537		10.9678	19.8093
98.1231	30.659		29.1763	19.8118
24.1618	30.6658		12.6688	19.8123
22.2972	30.6873		26.2699	19.813
25.1932	30.7016		36.1577	19.8147
54.2585	30.7292		47.5154	19.8163
28.7173	30.7303		58.5226	19.8183
78.1959	30.7344		53.1481	19.8281
38.7625	30.7568		53.8786	19.8298
49.5651	30.7568		10.2068	19.8417
36.7771	30.7773		48.9615	19.8535
51.8617	30.7881		26.6791	19.8611
21.2061	30.8017		28.2968	19.8618
82.7953	30.8039		60.9019	19.8649
36.0519	30.8356		25.1362	19.8678
76.1439	30.8359		72.2838	19.8702
23.6623	30.8582		21.1465	19.878
74.7125	30.8588		25.4254	19.8896
91.6584	30.8706		12.7031	19.8952
7.07962	30.8722		56.6839	19.8989
39.3069	30.9041		35.4763	19.9035
54.6744	30.9432		44.8417	19.9067
19.9237	30.962		47.9433	19.9155
99.0396	30.965		61.341	19.9176
114.576	30.9996		37.8753	19.9219
14.3023	31.0051		16.5574	19.9363
25.3171	31.0079		87.5343	19.9403
82.7801	31.0088		59.6851	19.9411
22.0917	31.0122		83.5739	19.9428
24.5216	31.037		70.2115	19.9504
24.3958	31.0484		30.6953	19.9619
32.5851	31.0541		48.8312	19.9638
14.1698	31.0783		15.2953	19.9649
16.7843	31.096		24.6094	19.9664
111.011	31.103		30.9735	19.9698
40.6116	31.1042		59.6413	19.9905
82.1811	31.1084		75.2768	20.0049
35.4081	31.112		86.8505	20.0055
46.2545	31.1151		31.3461	20.0115
11.0036	31.1167		15.5714	20.0241
17.0312	31.1415		22.2847	20.037
38.5517	31.1652		24.2824	20.0379
43.8779	31.1659		78.072	20.0446
50.5247	31.2308		37.8515	20.0519
20.9396	31.2446		82.7133	20.0609
23.7771	31.2466		12.9544	20.0696
16.0435	31.2588		56.6189	20.0745
16.7153	31.263		62.0094	20.0781
43.1648	31.2837		56.4954	20.0797
59.8704	31.2954		46.5976	20.0936
27.359	31.3299		24.2614	20.0964
39.0214	31.3516		16.1465	20.1044
27.6451	31.371		25.5617	20.1089
39.4007	31.3956		32.7127	20.1095
7.96654	31.4093		43.8826	20.1096
61.2473	31.4264		75.645	20.1128
19.0628	31.4266		46.9607	20.1219
45.3507	31.4789		29.2283	20.1256
38.6638	31.492		60.9076	20.1359
38.4669	31.4946		37.2427	20.1369
53.0708	31.5346		43.3167	20.1469
3.49219	31.5347		46.6355	20.1487
30.2808	31.5416		35.7834	20.1513
28.1548	31.5436		25.876	20.1664
20.6328	31.5596		39.5185	20.168
37.1529	31.5703		33.2723	20.1701
49.0882	31.6002		37.8673	20.1782
31.1667	31.6761		54.0697	20.184
81.2786	31.7022		50.9652	20.1996
40.4654	31.7632		42.3616	20.2175
15.1241	31.7668		31.2494	20.218
5.37821	31.7688		7.32533	20.2231
66.5606	31.7788		22.519	20.2357
60.8563	31.8022		69.5682	20.2653
59.9294	31.803		108.612	20.2726
94.8185	31.811		62.1695	20.278
63.287	31.8228		50.6728	20.2851
63.0567	31.8302		23.3663	20.2935
12.5369	31.8699		15.5717	20.2939
35.6958	31.8896		95.9626	20.2998
45.2715	31.913		60.8132	20.3106
97.5994	31.9198		19.9572	20.3181
31.4242	31.9208		18.6049	20.3214
20.2354	31.9424		29.4409	20.3241
7.82534	31.9737		42.639	20.3265
92.6066	31.9786		57.8881	20.3363
61.2854	31.9895		42.57	20.3409
22.7477	32.0167		45.1261	20.3447
67.7483	32.0257		23.6152	20.3486
22.9638	32.0258		25.3769	20.3589
66.9531	32.0352		35.3802	20.3656
89.9461	32.0567		92.3584	20.3668
34.8431	32.0882		28.2046	20.3772
42.59	32.1018		19.6115	20.3892
13.0231	32.1082		61.4579	20.4038
60.5235	32.1155		53.7207	20.4199
62.1014	32.1352		17.0032	20.4226
28.4021	32.1357		43.7718	20.423
54.4398	32.1446		30.7048	20.4256
16.2469	32.1627		51.375	20.4306
158.115	32.1719		40.9464	20.432
47.6026	32.2195		14.5886	20.4355
34.0934	32.2466		34.7781	20.4371
88.7071	32.2499		82.399	20.4376
55.266	32.2918		41.7759	20.4555
62.9184	32.3238		28.7	20.4582
47.8307	32.325		52.6755	20.4634
48.527	32.3555		53.1667	20.4705
8.03556	32.3652		44.164	20.4726
13.1424	32.3711		15.6	20.4837
22.6378	32.3921		43.5252	20.4858
48.9622	32.3939		41.0709	20.5123
42.6718	32.4062		29.95	20.5264
27.9268	32.4153		59.4888	20.5277
9.57438	32.419		27.9798	20.5291
13.0874	32.4222		34.0499	20.5314
46.6579	32.4758		28.8559	20.5342
66.2937	32.5011		31.893	20.5352
49.7701	32.5023		88.6839	20.5371
24.7944	32.5219		42.446	20.5395
42.5565	32.5519		84.1005	20.5424
29.464	32.5557		26.1615	20.5574
41.7842	32.585		31.8333	20.5838
40.7135	32.6177		96.1171	20.585
45.6754	32.6287		68.9101	20.5968
23.3112	32.6621		30.902	20.5976
5.53354	32.6698		27.8402	20.6008
58.774	32.675		45.7824	20.6051
15.9096	32.6846		43.4743	20.6141
41.8244	32.6863		68.042	20.6143
38.6597	32.734		12.8391	20.6231
11.9435	32.7791		67.8559	20.6239
44.4079	32.7872		22.7246	20.624
122.08	32.7956		40.8491	20.6275
37.5345	32.8659		29.9359	20.63
41.6375	32.8806		46.7546	20.6359
96.9688	32.8859		43.7766	20.647
78.058	32.91		23.6394	20.6477
30.0062	32.9265		81.1603	20.6721
10.2266	32.9661		44.6601	20.6769
48.4336	32.9858		39.8462	20.6892
5.365	32.9977		41.3753	20.711
30.1494	33.0008		34.5015	20.7114
10.6751	33.0268		44.5257	20.712
19.275	33.0375		82.6327	20.7138
160.226	33.0499		22.2598	20.7149
16.9471	33.0571		38.9063	20.7166
34.2746	33.0608		32.9821	20.7216
20.875	33.0745		51.7974	20.7303
71.4545	33.1127		70.987	20.731
50.6753	33.1298		69.8521	20.7318
60.6753	33.1847		69.5885	20.7322
41.9788	33.2017		18.5984	20.7382
20.1828	33.2269		26.3941	20.7407
14.11	33.2332		11.1649	20.7473
22.1868	33.2503		11.8032	20.7531
26.3837	33.256		18.1943	20.7556
18.2247	33.2677		47.1884	20.7564
18.3399	33.326		18.9093	20.7598
23	33.3473		49.913	20.7603
67.6343	33.3526		37.3396	20.7605
87.3329	33.3736		10.2628	20.7634
34.3757	33.402		39.2685	20.7646
69.7732	33.406		25.942	20.7778
33.7535	33.429		54.7463	20.7882
19.8033	33.4404		41.318	20.7972
108.009	33.4567		47.8043	20.8036
56.8314	33.506		36.2356	20.8155
37.9492	33.5541		38.5583	20.8201
49.8713	33.5794		93.9229	20.8437
53.5729	33.5967		62.7224	20.8446
22.3746	33.622		79.1338	20.8496
68.8793	33.6273		35.8924	20.8565
42.3321	33.653		22.3694	20.8632
54.5209	33.6634		60.8844	20.8633
33.5573	33.6677		53.5208	20.8821
23.3218	33.6694		52.2279	20.8856
11.1638	33.6731		22.017	20.8864
22.1966	33.6987		23.6613	20.8919
43.8585	33.7242		22.425	20.9007
39.5899	33.739		21.6544	20.9057
46.7482	33.7591		102.736	20.9155
11.1546	33.7856		47.6707	20.9288
21.1098	33.8244		84.2757	20.9312
73.8885	33.8255		36.1414	20.9382
28.3014	33.8258		2.76285	20.954
53.0643	33.8281		66.5502	20.9595
43.5358	33.8755		27.465	20.9604
46.2944	33.9183		43.55	20.969
22.4604	33.9336		38.0446	20.9727
24.7505	33.9658		20.2731	20.9769
60.7267	33.9798		42.5251	21.0192
31.2567	34.0221		36.2751	21.0214
43.9024	34.0934		29.2522	21.023
64.754	34.1102		68.2069	21.0235
38.1868	34.1333		31.492	21.0235
96.9773	34.1429		7.95537	21.0295
23.0795	34.1984		69.9362	21.0458
8.54878	34.2085		62.44	21.0505
100.096	34.2486		36.911	21.052
40.4207	34.2583		35.5518	21.0529
50.6956	34.3195		21.9887	21.0557
69.3485	34.3372		58.2476	21.0585
19.5423	34.4512		36.4881	21.0603
60.7036	34.4555		65.3979	21.0642
53.3805	34.5071		118.333	21.0718
4.16525	34.5091		78.891	21.0771
92.5535	34.5435		69.7234	21.0802
86.4021	34.5776		59.3214	21.084
51.3444	34.5898		51.7676	21.086
63.1379	34.6137		30.9777	21.0861
58.5581	34.6214		90.2381	21.0876
16.3333	34.6269		8.13932	21.0932
56.998	34.6288		71.4174	21.0935
25.9072	34.6341		72.6844	21.0948
34.5686	34.6814		27.0723	21.0979
58.2988	34.7173		7.67059	21.0994
34.1629	34.7456		14.8197	21.1153
66.4042	34.752		42.083	21.1181
23.4378	34.7559		35.3501	21.1202
53.4565	34.7562		38.3648	21.1326
70.1889	34.7669		61.7548	21.1409
19.0145	34.7721		37.0679	21.1425
50.4192	34.7909		72.5856	21.1506
27.5582	34.7968		16.2295	21.1536
30.6795	34.8023		36.9173	21.1568
19.5347	34.8702		27.3378	21.1635
33.3333	34.88		23.222	21.1665
29.2439	34.8819		23.4825	21.1667
23.1516	34.8837		31.3381	21.169
75.3545	34.9071		14.964	21.1703
61.9714	34.9398		30.8586	21.1739
19.0722	34.9634		89.5862	21.174
86.996	34.969		31.1753	21.1802
10.9348	35.0291		57.1084	21.1829
35.7915	35.0511		91.8405	21.1901
20.893	35.077		34.7541	21.1912
39.1586	35.0815		98.8345	21.192
41.3333	35.106		91.9699	21.2178
91.6594	35.1282		54.3661	21.2227
90.9199	35.2253		42.5391	21.2266
44.6211	35.2299		63.9161	21.2291
27.0297	35.238		29.3092	21.2316
101.193	35.2413		63.0424	21.2324
54.5019	35.3027		25.2992	21.2362
38.1261	35.332		74.3777	21.2389
71.3768	35.3859		35.4846	21.2401
43.6908	35.3862		33.9036	21.2403
188.62	35.4035		46.2943	21.2422
35.4866	35.4561		37.2822	21.2521
27.6013	35.4633		29.5942	21.2571
51.4379	35.4734		42.8186	21.2618
32.3766	35.4844		39.3024	21.2673
22.9682	35.5202		18.2657	21.2754
29.0935	35.5892		20.2935	21.2793
41.7352	35.6479		18.0957	21.2805
5.95041	35.6497		30.799	21.2834
63.1936	35.6546		23	21.2859
37.0384	35.6548		53.8843	21.2897
49.8766	35.672		48.3193	21.3011
86.9647	35.6767		31.5679	21.3057
24.9506	35.7136		35.965	21.3063
53.2293	35.7283		14.3188	21.3076
53.5488	35.7374		37.0078	21.3158
40.4832	35.762		88.7872	21.3202
15.7955	35.7903		44.2644	21.3244
45.179	35.7973		33.3857	21.3257
31.8289	35.7979		97.0641	21.3289
116.932	35.8046		9.87097	21.3342
64.2915	35.8203		22.2264	21.3364
10.5165	35.8375		39.2729	21.3454
24.6651	35.8592		27.9932	21.3494
51.353	35.9534		20.6489	21.3514
32.2217	35.9662		46.0517	21.3539
99.6115	36.0222		59.4015	21.3577
81.0264	36.0995		22.907	21.3704
51.7069	36.1028		45.8221	21.3727
88.7711	36.108		13.6087	21.3732
44.5278	36.1593		64.883	21.3763
16.2128	36.1886		71.7563	21.3834
16.5614	36.2562		17.6535	21.3849
39.264	36.2566		33.8906	21.3922
22.762	36.2608		52.3846	21.3991
50.5586	36.2664		40.2244	21.407
53.6351	36.2756		14.0535	21.4123
13.0374	36.3013		33.8449	21.425
89.6316	36.3133		43.0725	21.4251
26.8687	36.3494		56.5566	21.4333
43.7798	36.3765		30.3316	21.4366
118.556	36.3965		36.9769	21.4393
152.569	36.4664		43.7603	21.4469
29.277	36.4758		41.2844	21.4555
81.636	36.4862		49.6573	21.4653
45.7725	36.4939		73.6582	21.4661
10.2286	36.5125		33.7869	21.4691
16.955	36.5409		31.7185	21.4738
20.0633	36.5684		30.8034	21.4778
22.4716	36.6117		53.3416	21.4862
15.0204	36.6206		52.1226	21.4922
34.3908	36.6369		17.5888	21.4929
40.3629	36.6506		48.1801	21.4942
24.0725	36.6643		37.9205	21.5015
43.3547	36.6938		28.631	21.5057
64.1963	36.7629		25.0702	21.5072
40.4886	36.8175		38.7594	21.5103
24.9151	36.8736		25.1133	21.511
26.6122	36.8748		50.5378	21.5129
103.052	36.8889		79.8473	21.5292
14.0233	36.9116		6.4359	21.5313
153.995	36.9626		18.5594	21.5368
26.4413	36.9787		47.3831	21.5458
115.904	36.9843		21.2857	21.5458
16.1667	37.0247		77.7713	21.5459
94.4545	37.0452		21.531	21.5463
12.5377	37.0538		42.6416	21.549
5.71517	37.0538		41.5948	21.5505
19.6604	37.0538		88.9235	21.5577
53.3633	37.0586		12.9977	21.5669
62.8624	37.0788		21.1911	21.5717
102.372	37.0799		43.2047	21.584
31.8841	37.0837		48.7937	21.5841
24.4726	37.1325		24.6828	21.5882
61.8395	37.1464		43.0172	21.5933
31.9573	37.1699		47.8342	21.5974
41.9866	37.1767		52.6242	21.6013
37.3946	37.2382		21.8428	21.6069
88.3452	37.2786		68.0664	21.6078
43.8036	37.2841		35.317	21.6127
45.7893	37.3134		82.1407	21.6152
15.2544	37.336		47.8893	21.6164
37.125	37.3379		32.5228	21.6171
112.783	37.3767		96.9135	21.6216
58.2878	37.4009		84.1565	21.6272
40.8661	37.4126		18.4126	21.6322
64.8327	37.4395		44.4753	21.6389
79.6986	37.4668		58.5399	21.6439
62.7629	37.5457		55.5217	21.6447
66.1099	37.5534		30.7633	21.6471
19.007	37.5975		44.5418	21.6489
40.2013	37.6189		38.147	21.6512
32.582	37.6577		15.4589	21.6708
81.2557	37.6757		36.8369	21.6729
82.7729	37.7232		62.9354	21.6735
40.1496	37.7291		43.3266	21.6808
102.247	37.7348		30.0755	21.6818
33.2533	37.7353		58.1687	21.6876
39.3233	37.7816		35.7631	21.69
41.1972	37.7895		52.7809	21.695
46.082	37.8497		33.6354	21.6999
34.2074	37.8557		50.6306	21.7
63.2581	37.8585		34.25	21.719
10.9869	37.8604		52.9462	21.7243
49.0111	37.8667		42.1584	21.7246
32.1228	37.9081		20.2736	21.7342
17.81	37.9204		46.5887	21.7443
43.9854	37.9461		26.9302	21.7532
27.8662	38.0173		32.5614	21.756
44.7489	38.1176		27.675	21.7597
47.5396	38.1303		29.927	21.7599
19.1011	38.1451		40.8311	21.7689
64.5705	38.1526		13.234	21.7739
58.9412	38.2305		21.3226	21.783
54.3474	38.3057		58.7309	21.7931
25.6094	38.3757		14.5843	21.8008
30.3675	38.4571		25.5671	21.8054
35.2676	38.4662		88.0642	21.8236
99.1559	38.515		32.0744	21.8284
27.395	38.5264		36.6685	21.8313
50.4314	38.5683		77.037	21.8314
13.1492	38.5877		26.5318	21.8343
70.126	38.6056		14.9776	21.8352
36.5245	38.6137		29.3914	21.84
73.0862	38.6314		38.0279	21.8571
59.9354	38.6479		19.3125	21.8586
36.6659	38.6692		22.3119	21.8617
17.2303	38.6881		19.5565	21.8631
38.5223	38.6983		64.738	21.8734
30.558	38.6995		71.8772	21.8826
135.972	38.7034		30.9014	21.883
28.7726	38.7121		49.7232	21.8878
42.6132	38.7819		56.2761	21.8993
25.0774	38.8184		39.113	21.9038
20.976	38.8396		51.645	21.9065
37.0524	38.8802		24.6458	21.9118
39.2156	39.0053		35.5118	21.9163
85.926	39.0396		38.1954	21.9164
18.0979	39.1063		11.5687	21.9174
33.5392	39.1184		30.7299	21.9189
68.4468	39.1435		56.6016	21.9194
19.5162	39.2138		12.6734	21.9368
29.5088	39.2249		29.0428	21.9476
93.8605	39.2608		39.4034	21.95
19.9441	39.2959		75.6069	21.9604
125.223	39.3247		31.3582	21.9608
11.245	39.3448		14.1174	21.9654
71.0651	39.3821		55.681	21.9667
64.3737	39.3831		11.1944	21.9696
34.3264	39.4071		71.4517	21.9727
33.3181	39.4514		22.4747	21.9793
17.8778	39.494		25.4876	21.9904
31.3509	39.5		21.1476	22.0076
32.9412	39.5115		70.4145	22.012
24.5399	39.5411		80.4056	22.0196
39.0881	39.5897		49.4517	22.0239
46.3437	39.6396		14.6175	22.0243
94.6556	39.7306		26.0661	22.0317
76.9444	39.7832		15.4292	22.0386
80.7546	39.8062		84.4409	22.0428
82.6081	39.8089		31.8141	22.0521
49.2195	39.8147		26.6759	22.0648
33.4893	39.8438		36.4012	22.0722
36.0275	39.8826		26.3548	22.0735
17.9421	39.8937		19.5024	22.0748
43.4959	39.9782		24.3687	22.0784
65.3577	40.0028		61.7226	22.0826
10.6323	40.0295		22.6911	22.086
94.542	40.1062		50.1969	22.0866
37.0144	40.1084		31.5014	22.0898
39.3347	40.1176		44.5441	22.094
21.1526	40.1299		47.1573	22.0969
84.888	40.1794		44.9111	22.101
57.7712	40.2054		36.9563	22.1051
84.9325	40.2881		41.0258	22.1075
18.8084	40.3813		61.0784	22.1105
45.4295	40.4673		41.7803	22.1124
36.8206	40.4786		46.2997	22.1166
75.4916	40.5086		22.0296	22.128
40.7596	40.5486		66.063	22.1298
106.111	40.5903		38.2742	22.131
52.4508	40.6102		81.7786	22.131
66.3453	40.6152		64.7663	22.1355
9.66265	40.6163		26.9182	22.1361
36.7906	40.6497		32.3775	22.1378
16.9087	40.7485		43.241	22.1382
6.2094	40.7939		14.4631	22.1391
11.4983	40.7986		47.5749	22.1407
75.5615	40.8079		58.2988	22.1415
56.3417	40.825		55.1797	22.1471
55.4805	40.8297		45.5789	22.1471
16.6573	40.8908		64.3853	22.1487
21.6835	40.903		34.2639	22.1533
40.6991	40.9233		34.3024	22.1559
105.644	40.9811		32.1904	22.1695
95.9938	41.1308		38.763	22.1806
23.3668	41.14		19.9581	22.1807
29.5687	41.1502		22.816	22.1893
58.7788	41.2101		60.156	22.1896
34.6286	41.2683		40.0917	22.19
19.7899	41.2929		19.7756	22.1911
29.8775	41.3014		59.6787	22.2005
43.8583	41.3177		81.1208	22.2085
48.7571	41.3358		93.2391	22.2148
39.2688	41.3396		45.8855	22.2171
32.8373	41.3887		90.8544	22.2181
19.2665	41.3973		28.8914	22.2211
23.8241	41.4061		43.4524	22.2273
73.7316	41.6641		24.0092	22.2303
19.312	41.685		46.9441	22.2304
38.6055	41.7309		80.7103	22.2321
115.295	41.7343		29.37	22.241
67.7715	41.7522		19.0319	22.2522
72.4825	41.7759		41.9108	22.2541
130.803	41.8233		81.707	22.2547
29.0942	41.8921		13.8668	22.2574
25.6748	41.9028		64.4226	22.261
28.8207	41.9402		21	22.2712
82.2744	41.9776		16.1088	22.2762
84.8017	41.9942		56.2373	22.2793
34.556	42.0379		68.9079	22.2807
46.0941	42.068		56.7384	22.2837
48.9895	42.108		76.0347	22.2852
30.3633	42.1221		36.1571	22.2855
29.7412	42.1694		43.7396	22.2865
52.632	42.2649		29.9922	22.2896
53.847	42.2672		57.6421	22.2904
70.4315	42.3928		89.5398	22.2906
52.4089	42.4008		61.9841	22.2907
9.86555	42.5969		54.0445	22.2915
16.9719	42.6413		64.7628	22.2917
61.6004	42.6436		74.1526	22.2987
29.8861	42.7554		24.9562	22.301
100.885	42.7604		86.5788	22.3071
55.0704	42.7912		86.1796	22.3083
45.8201	42.8261		63.5654	22.3113
50.6848	42.8387		61.3953	22.323
28.6512	42.965		59.3858	22.3333
22.5689	42.9664		24.7416	22.3337
37.3424	42.9783		8.06122	22.3381
33.2464	43.0271		20.2163	22.3452
14.1313	43.0332		18.0895	22.3464
37.0115	43.1244		53.9113	22.3465
24.6016	43.1667		115.635	22.3526
82.4311	43.2872		51.7123	22.353
21.2543	43.3014		60.2708	22.356
9.2046	43.3214		83.2476	22.3588
131.508	43.3678		48.9352	22.3633
67.1854	43.3956		73.2599	22.365
13.0288	43.4029		36.8944	22.3655
83.4919	43.4222		46.0705	22.367
29.0395	43.4285		32.0514	22.3828
58.1517	43.4713		21.8458	22.3861
71.9816	43.4869		23.6239	22.3876
37.8073	43.496		38.1006	22.3908
13.4013	43.5404		25.5237	22.3915
110.202	43.5729		55.7761	22.4046
94.0372	43.5751		30.0806	22.4098
18.0903	43.6161		87.1172	22.4124
29.2902	43.6458		15.3002	22.413
54.2836	43.6676		73.1719	22.4175
46.1524	43.727		67.9157	22.4223
31.5148	43.7385		49.4552	22.4319
16.3636	43.7814		39.9206	22.4341
157.9	43.8898		109.997	22.437
94.1146	43.9275		49.1324	22.4398
32.9595	43.9773		25.6193	22.4436
17.1979	43.9833		34.7	22.4437
23.62	43.9893		58.1216	22.4485
77.7	44.121		13.0369	22.4563
32.6653	44.1978		58.9813	22.4597
59.027	44.2157		15.1321	22.4599
35.7146	44.2494		77.4444	22.4602
10.5182	44.264		43.9376	22.4691
118.675	44.2736		67.6122	22.4781
51.8287	44.4298		46.5338	22.4851
19.616	44.4397		101.073	22.4866
95.099	44.5744		10.4784	22.4866
89.1244	44.5949		57.3515	22.4981
19.1196	44.6007		92.136	22.4992
98.613	44.7341		82.7849	22.5065
61.075	44.7915		24.6038	22.5079
53.0169	44.8405		35.3818	22.5175
18.2622	44.8409		38.8097	22.5178
51.3467	44.8937		38.416	22.5228
13.3374	44.9544		99.4596	22.5298
46.6453	45.1383		101.43	22.5398
17.766	45.2552		66.1081	22.552
29.6997	45.2585		71.1941	22.5568
31.5425	45.3232		44.4519	22.5621
23.3682	45.335		59.9333	22.5666
65.6448	45.3401		53.3703	22.572
55.3509	45.3513		39.0769	22.5756
8.284	45.3711		24.9393	22.5762
82.0298	45.4067		29.6121	22.5835
97.1433	45.4234		31.2438	22.5861
46.8492	45.4979		42.3096	22.5871
69.9735	45.5554		52.3869	22.5903
21.5881	45.7613		69.0968	22.6008
14.5542	45.8715		37.3092	22.616
49.571	45.8974		45.7939	22.6181
108.433	45.946		15.7439	22.6307
156.831	46.0667		45.0249	22.6323
52.4693	46.078		47.2587	22.6357
21.0971	46.1084		46.691	22.6358
22.1502	46.2137		45.2708	22.6403
52.1094	46.2668		66.9707	22.643
42.3435	46.3184		114.334	22.6511
78.6468	46.43		9.80984	22.6528
32.8285	46.4911		89.1877	22.6561
37.7945	46.5228		36.5984	22.6564
8.6449	46.8464		71.7686	22.6569
44.2093	46.865		35.3972	22.6621
24.533	46.8654		13.9548	22.6702
69.4419	47.0013		39.2248	22.6746
23.337	47.1164		21.4585	22.681
78.4955	47.1376		54.1523	22.6812
32.3836	47.1523		17.9006	22.6823
17.5	47.3133		86.6271	22.6829
82.4586	47.3743		33.4924	22.6835
16.3524	47.3743		39.1851	22.701
62.3778	47.4432		16.27	22.7012
21.4073	47.4868		91.093	22.7024
38.3308	47.489		13.3695	22.7033
40.1205	47.6287		52.3203	22.7051
30.1785	47.6456		47.139	22.7098
60.5013	47.8076		34.2672	22.7151
32.1599	48.1308		21.509	22.7152
25.7523	48.2375		22.3212	22.7188
31.6626	48.2976		69.7089	22.7202
84.8354	48.8194		22.9128	22.7374
44.969	48.9436		42.7926	22.741
25.3617	48.997		37.4547	22.7483
103.252	49.0259		41.8315	22.7574
16.8503	49.1034		45.0741	22.7652
8.3125	49.2286		23.0534	22.7684
75.1048	49.2629		49.2318	22.776
43.6113	49.3204		68.4581	22.7844
25.2944	49.4144		18.2629	22.7856
44.6687	49.4191		30.6724	22.8012
39.5321	49.4217		50.1618	22.8055
123.88	49.6674		64.7673	22.8068
28.6779	49.6809		20.2272	22.813
43.7268	49.7647		40.7085	22.834
86.4595	49.767		33.983	22.8352
17.8227	49.8179		48.8101	22.8399
39.0739	49.8872		7.93851	22.8403
32.0769	50.0597		42.0699	22.8422
108.94	50.0948		8.33176	22.8424
30.4573	50.4517		26.5714	22.8471
36.0548	50.4559		40.369	22.849
78.9847	50.7475		90.8854	22.8626
19.2023	50.7486		11.898	22.8794
90.5931	50.7741		44.3568	22.8807
35.1694	50.8976		47.9672	22.8831
61.0774	50.9056		23.6215	22.8921
21.284	51.1301		75.781	22.8941
37.7487	51.2385		19.1089	22.8999
134.649	51.4589		44.3	22.9088
6.68165	51.4708		8.62326	22.9116
34.6159	51.6116		28.6821	22.9164
86.2977	51.7929		46.5894	22.9303
63.9573	51.9301		37.7353	22.9336
37.3205	52.014		31.2078	22.9558
26.1663	52.107		35.7631	22.9563
39.1933	52.2658		13.3107	22.9603
17.1879	52.459		49.4669	22.9644
134.145	52.494		13.5027	22.9871
25.0195	52.552		58.4068	22.9903
65.799	52.8035		13.3697	22.9904
25.444	52.8498		32.1663	22.9983
26.2472	52.8967		6.62781	23
62.4286	52.9276		40.476	23.0054
62.8266	53.0375		33.5702	23.0147
65.697	53.1381		18.7381	23.0249
124.503	53.4686		32.0379	23.0251
36.5049	53.7152		36.6286	23.0273
24.6381	53.8303		31.6079	23.0292
34.3343	54.0014		41.8538	23.0378
28.9258	54.0247		59.7112	23.0433
66.3431	54.9109		36.3064	23.0455
44.5534	55.1365		95.7767	23.046
39.1292	56.4188		49.426	23.0479
31.8651	56.4637		25.0154	23.049
70.4326	57.0296		30.5925	23.0505
40.3974	58.1208		36.4714	23.0597
23.3701	58.6842		90.4173	23.062
45.966	58.7509		60.2225	23.065
19.0621	59.1442		12.5813	23.0655
23.2826	59.2649		26.2239	23.0673
41.6131	59.2839		44.1468	23.0722
46.8718	59.4715		79.7572	23.0747
42.2362	59.7228		24.1308	23.0808
68.394	62.0358		19.2137	23.085
38.5308	62.4872		33.4302	23.0945
62.2803	62.8783		20.1542	23.0968
20.082	62.9044		52.961	23.1082
82.3218	63.7268		25.7094	23.1173
34.6478	63.791		20.5659	23.1179
24.8457	64.3531		18.1457	23.1194
21.1816	64.4561		38.4548	23.1213
45.8642	64.549		27.1608	23.1221
121.475	65.3357		66.9016	23.1263
15.926	66.328		13.8031	23.128
64.9281	68.2721		55.8427	23.1312
78.7492	68.3023		20.5428	23.1419
29.3547	69.2698		38.4846	23.1429
22.4724	69.8391		27.8361	23.1436
71.4056	74.0454		29.4412	23.144
52.485	74.1878		23.0023	23.1457
71.7077	74.2688		61.0633	23.15
103.475	76.6361		28.6132	23.1507
27.684	77.4096		13.6439	23.151
16.009	77.885		37.4932	23.1587
20.856	78.1221		40.8462	23.1721
18.3569	79.1872		36.4796	23.1854
6.53468	81.3093		46.3611	23.1883
27.0905	82.2663		16.1256	23.1889
111.83	82.4367		39.4905	23.1944
24.705	85.6569		60.6396	23.1992
15.4234	86.0073		44.8134	23.2005
38.9225	87.1144		83.6828	23.2032
32.3249	90.6278		16.9923	23.2081
34.5583	91.6764		62.2943	23.2117
17.0194	93.8243		20.9879	23.214
20.7054	98.3656		90.074	23.2225
45.8966	101.402		32.0712	23.2238
55.6149	101.679		41.5895	23.2272
67.5986	102.371		22.5779	23.2305
90.4104	107.554		47.2699	23.2315
53.1329	108.586		47.9669	23.232
28.063	109.382		35.7606	23.232
86.3486	110.656		21.7622	23.241
59.4825	110.991		78.3333	23.2445
68.9949	128.383		57.7307	23.2485
99.0051	137.238		46.6765	23.2497
12.6314	139.35		40.5418	23.2521
55.051	141.335		48.2904	23.2572
86.8278	141.703		43.1513	23.2655
88.5742	144.475		59.5657	23.2658
91.9451	148.318		42.0996	23.2711
82.967	149.368		20.7376	23.2718
107.353	151.493		97.281	23.2718
35.183	155.477		55.534	23.2728
77.4365	156.216		67.6678	23.2776
18.3444	158.922		57.7452	23.2861
55.376	166.869		55.6726	23.2892
20.4397	171.302		47.33	23.2926
102.041	180.058		30.6549	23.3011
37.9336	189.55		27.377	23.3018
20.2093	189.757		46.6214	23.3049
85.5533	204.461		82.8449	23.3079
89.7414	207.835		70.5468	23.3182
44.5198	239.13		44.1154	23.3189
5.56466	249.578		111.041	23.322
76.3458	372.624		50.1136	23.3223
			39.4488	23.3265
			74.075	23.3324
			39.4225	23.3468
			75.3631	23.35
			72.2622	23.3556
			81.6545	23.359
			55.7085	23.3622
			48.826	23.3676
			82.2936	23.3795
			39.7478	23.3795
			103.554	23.3895
			60.2308	23.3914
			52.4275	23.3952
			51.1444	23.3983
			86.0909	23.4044
			34.3516	23.4137
			42.0702	23.4143
			79.4865	23.4178
			56.7318	23.4217
			18.4033	23.4218
			42.7982	23.4226
			112.312	23.4275
			68.8502	23.4292
			38.7286	23.4346
			40.4269	23.4455
			47.5485	23.4488
			47.4399	23.454
			42.5808	23.4542
			28.9242	23.4562
			39.2922	23.4569
			37.6143	23.4608
			59.2482	23.4655
			42.0703	23.4687
			45.3412	23.4716
			77.795	23.4741
			77.4799	23.4793
			22.8454	23.4844
			41.4397	23.4894
			25.4686	23.4953
			15.4716	23.4982
			36.0441	23.5008
			68.2797	23.5036
			15.0393	23.507
			16.1368	23.508
			6.47239	23.5174
			40.8198	23.5176
			22.7632	23.5212
			70.929	23.5238
			31.4209	23.5284
			48.4908	23.5303
			27.895	23.5304
			36.01	23.5331
			45.649	23.5341
			78.924	23.5431
			42.0388	23.5515
			48.6184	23.5517
			43.2053	23.5579
			36.3265	23.5647
			64.2241	23.5648
			59.113	23.5758
			18.8276	23.5766
			26.4113	23.5875
			30.6262	23.5956
			43.5517	23.5962
			12.5933	23.6
			23.8107	23.6007
			115.309	23.6035
			20.98	23.6146
			18.9904	23.6223
			17.3312	23.6241
			90.0378	23.6244
			36.4222	23.6287
			7.15812	23.6298
			39.9046	23.6333
			41.43	23.6374
			27.4424	23.6504
			46.4876	23.6524
			22.872	23.66
			34.6824	23.6611
			12.9562	23.6652
			86.4125	23.6736
			34.0992	23.676
			31.3017	23.6805
			45.971	23.6808
			85.2857	23.6832
			34.6392	23.6836
			67.9195	23.6894
			23.6527	23.6964
			19.199	23.7087
			53.188	23.7161
			56.0567	23.7289
			40.4121	23.7343
			39.6932	23.736
			59.8022	23.7374
			22.5956	23.7447
			35.9915	23.7521
			20.2424	23.754
			8.05811	23.7624
			58.894	23.7628
			85.1471	23.7634
			33.0412	23.766
			113.454	23.776
			64.3402	23.7767
			61.9952	23.778
			40.3407	23.7798
			25.2346	23.7814
			54.1627	23.7815
			12.7047	23.7844
			53.0716	23.7935
			52.2932	23.7961
			67.9083	23.7987
			57.2938	23.808
			87.9209	23.824
			26.8953	23.8306
			68.0699	23.8319
			17.0465	23.8442
			89.1497	23.846
			20.8035	23.8565
			39.2633	23.8613
			103.755	23.873
			21.2243	23.8758
			43.0321	23.8786
			10.5416	23.8828
			29.9604	23.8848
			21.6636	23.886
			96.1278	23.8899
			28.0805	23.8902
			31.8344	23.8931
			56.2644	23.9021
			85.2448	23.9041
			35.1149	23.9068
			21.7704	23.9104
			41.4564	23.9109
			121.755	23.9129
			38.028	23.9155
			81.7983	23.9247
			17.4939	23.9268
			14.7624	23.9334
			29.7118	23.9407
			70.131	23.9436
			50.5817	23.9463
			48.5091	23.9467
			22.3705	23.9522
			26.8278	23.9572
			47.1592	23.9669
			83.331	23.9709
			38.3108	23.9769
			5.08636	23.9838
			42.09	23.9911
			75.8132	23.9915
			25.6152	23.9938
			57.8879	24.001
			34.4325	24.0025
			49.9505	24.0026
			67.602	24.0113
			77.0362	24.0151
			8.03505	24.0197
			50.511	24.0215
			35.0476	24.0222
			26.7432	24.0226
			27.5114	24.0266
			40.2609	24.029
			64.1824	24.0308
			56.2284	24.0323
			43.2125	24.0323
			40.9311	24.0327
			86.4441	24.0331
			39.9787	24.0343
			110.257	24.0352
			46.23	24.0368
			87.4187	24.0394
			32.9466	24.0418
			58.5121	24.0447
			118.185	24.0474
			30.41	24.0483
			30.1324	24.0501
			23.8915	24.0503
			20.41	24.0513
			47.6546	24.0537
			51.7268	24.0572
			49.5388	24.0661
			61.5623	24.0706
			25.3917	24.0729
			84.1248	24.0889
			26.8436	24.0956
			43.1101	24.0975
			54.5086	24.1023
			42.8071	24.1036
			20.4571	24.1136
			33.7799	24.121
			34.3626	24.1282
			32.0952	24.1288
			30.2478	24.1309
			50.903	24.1332
			41.3098	24.1364
			15.1854	24.1388
			47.9644	24.1424
			23.5508	24.1437
			45.9853	24.15
			47.3395	24.1523
			46.0048	24.1561
			56.6521	24.158
			30.6365	24.1594
			29.9301	24.161
			72.2234	24.1683
			32.1114	24.1714
			53.1826	24.1724
			23.8558	24.1738
			34.845	24.1773
			50.8298	24.182
			29.1748	24.1845
			8.41749	24.1856
			25.7948	24.187
			28.233	24.1877
			55.7973	24.1888
			42.4466	24.1898
			46.1509	24.198
			42.8943	24.1994
			34.0524	24.2005
			19.3742	24.207
			93.568	24.2119
			22.0795	24.2166
			33.6843	24.2187
			61.2731	24.2195
			11.7587	24.2226
			44.1593	24.2266
			77.4322	24.227
			51.4553	24.2402
			71.9628	24.2478
			43.1803	24.2533
			30.8106	24.2612
			30.776	24.2656
			24.7981	24.2673
			20.3693	24.2676
			17.8431	24.2783
			16.9312	24.3017
			108.24	24.3041
			41.2776	24.3044
			15.8462	24.3155
			37.1503	24.3217
			17.5259	24.3249
			93.3388	24.3346
			58.1645	24.3359
			102.384	24.3375
			15.5878	24.3423
			22.6479	24.3424
			23.9433	24.3458
			23.5585	24.3494
			36.6139	24.3642
			53.1755	24.3702
			34.8882	24.3716
			38.9026	24.3763
			71.0059	24.3825
			64.9213	24.3876
			34.6777	24.4049
			18.3377	24.4141
			50.1266	24.4227
			73.8297	24.4236
			8.91551	24.4262
			43.1944	24.4264
			30.719	24.4325
			26.2104	24.4327
			35.5302	24.4333
			31.7422	24.4409
			23.8343	24.4425
			19.2267	24.4443
			57.775	24.4459
			51.0518	24.4474
			31.6777	24.4476
			49.832	24.448
			82.1241	24.4556
			32.7135	24.4645
			9.06192	24.4664
			40.4218	24.4723
			67.9755	24.4752
			29.5596	24.4771
			52.5518	24.4776
			41.2633	24.4868
			42.8449	24.4918
			52.9923	24.4956
			23.1887	24.503
			12.5115	24.5082
			25.0932	24.5157
			30.4758	24.5159
			32.9621	24.526
			22.6764	24.5298
			44.851	24.5332
			30.612	24.5408
			53.6029	24.5418
			38.9149	24.5419
			40.3458	24.542
			75.6303	24.5443
			18.1147	24.546
			35.446	24.5565
			37.5707	24.557
			48.4766	24.5573
			63.347	24.5584
			27.7687	24.5614
			100.198	24.5621
			89.1391	24.5674
			75.516	24.5727
			51.7391	24.5745
			46.7102	24.5786
			86.8014	24.5814
			73.0185	24.5954
			50.2354	24.5969
			28.0081	24.5976
			72.3535	24.5987
			23.7896	24.605
			17.2905	24.6053
			17.6473	24.6077
			31.3994	24.609
			37.4429	24.6154
			12.3612	24.6194
			105.249	24.6287
[truncated: 1,978 more rows]

## Sheet: Donor 5
Well 1			Well 2			Well 3			Infected cells
CPSF6	CA		CPSF6	CA		CPSF6	CA		Non infected cells
14.8093	3.30522		48.6148	4.48925		15.2514	5.10027
6.52874	4.01521		71.3805	4.7767		41.7696	5.87872
61.3762	5.57692		78.5948	4.77778		68.4085	5.96313			CPSF6 mean	Mean infectivity (%)
32.8904	5.83276		77.8494	5.99769		86.4919	5.98113		NS control	185.047	7.368
96.0322	6.718		27.0812	6.08251		64.4838	6.07857
75.101	6.76042		67.4677	6.2545		57.6568	6.21294
9.77075	6.77953		36.281	6.28527		10.4764	6.5641		K/D
75.8039	6.82748		101.271	6.34973		126.744	6.58559		Well	Mean CPSF6	CPSF6 left	K/D efficiency (%)	Infectivity (%)	KD:NS infectivity
52.6605	6.86029		39.8523	6.35659		44.5483	6.66927		1	96.7602	52.3028	47.6972	5.67	0.769544
8.80385	6.86296		11.5312	6.5796		158.861	6.83682		2	86.2076	46.5987	53.4013	4.3434	0.589495
60.4194	6.9193		101.281	6.66757		65.965	6.86538		3	82.8447	44.7809	55.2191	5.547	0.75285
40.3622	6.96896		84.4008	6.67227		73.45	6.92952
53.1111	6.97241		130.269	6.73178		63.8233	6.97863
53.5041	6.98367		64.276	6.74352		120.877	7.0493
18.2077	7.06038		140.171	6.81053		26.65	7.19027
6.85079	7.08544		92.6981	6.8216		53.4375	7.38244
85.573	7.20213		83.6189	6.82996		110.264	7.44397
28.0612	7.3666		41.8324	6.89757		29.7139	7.49422
11.6626	7.38934		42.8436	6.91502		109.683	7.52795
54.6146	7.3975		70.4381	6.96476		90.8319	7.61714
89.2351	7.40621		64.9883	7.04809		153.431	7.71144
69.897	7.44702		126.066	7.04846		138.941	7.72018
10.5491	7.52991		40.2391	7.05195		64.8187	7.7352
55.6956	7.58018		60.7977	7.10204		55.1951	7.73684
63.3487	7.62058		97.8571	7.17333		61.7353	7.79872
57.7579	7.78082		18.8731	7.25573		78.6496	7.85106
44.6171	7.88341		47.1095	7.3		80.942	7.92444
78.5986	7.89161		132.155	7.30864		85.1716	7.99733
60.3869	7.92513		57.995	7.46305		69.3483	8.02364
59.7346	7.98773		128.391	7.49558		69.2051	8.03409
107.035	8.01154		21.4185	7.52193		175.575	8.07184
64.0723	8.02929		74.4036	7.57364		39.9032	8.08219
68.766	8.11765		136.767	7.59267		16.9861	8.08242
72.2386	8.14332		134.885	7.6079		140.731	8.10055
16.6871	8.19322		68.4174	7.60944		28.5798	8.16529
96.2193	8.22593		112.403	7.69176		95.4248	8.16667
76.4276	8.28667		94.3128	7.71762		70.8972	8.17674
106.996	8.308		132.232	7.7253		70.2103	8.21008
63.4354	8.3661		124.145	7.73251		49.3947	8.2199
9.98104	8.4026		72.4194	7.75		76.0698	8.23056
34.5069	8.46789		9.76829	7.76923		55.7981	8.29358
9.91667	8.47115		27.5246	7.77174		97.5266	8.30937
71.7266	8.48312		119.113	7.77712		139.757	8.32302
65.7203	8.48669		95.4466	7.78346		169.837	8.35793
142.838	8.51643		32.1139	7.78445		106.99	8.35903
65.7292	8.52893		91.2451	7.86822		103.157	8.36697
58.5325	8.54701		27.3314	7.90058		41.6492	8.38957
113.089	8.56279		9.26906	7.92478		106.977	8.43939
102.197	8.57981		18.75	7.93883		52.3239	8.456
145.616	8.59512		126.948	7.94425		85.5415	8.46117
126.933	8.6269		54.9481	8.0293		76.8568	8.47516
118.748	8.63		11.5841	8.06787		80.0918	8.47727
44.3917	8.6347		112.575	8.06838		53.2828	8.48401
100.455	8.64505		30.7909	8.0771		12.8662	8.52443
55.2857	8.66111		32.7112	8.09268		20.7269	8.52574
42.4965	8.69393		160.619	8.10212		76.7033	8.52756
80.8382	8.74074		72.5317	8.11165		42.5316	8.53141
51.9027	8.74131		46.6005	8.11278		102.75	8.55274
108.753	8.75746		103.068	8.11661		31.5299	8.57196
108.565	8.75904		89.6559	8.12562		94.451	8.60817
46.8767	8.77869		83.5478	8.13016		22.9349	8.63127
68.8539	8.80631		69.5495	8.133		118.317	8.63556
66.9081	8.80634		44.1636	8.14452		92.5889	8.6455
107.506	8.83884		117.863	8.18483		90.2535	8.70776
60.3333	8.84429		83.405	8.18719		35.8082	8.71622
60.894	8.84932		101.088	8.19214		191.161	8.72404
77.22	8.86508		86.37	8.2		52.6705	8.73384
144.336	8.87234		94.2054	8.20264		81.7136	8.78208
83.0041	8.91736		34.0472	8.22701		127.736	8.79295
110.643	8.92115		15.2688	8.23228		26.0635	8.79747
105.196	8.96169		103.021	8.23494		198.275	8.80711
48.2868	8.96447		74.6048	8.25592		134.688	8.81843
68.3429	8.9763		66.5377	8.32124		51.2029	8.82692
73.4615	9.01887		32.762	8.33838		162.985	8.83686
71.6829	9.01892		90.9456	8.35613		116.398	8.84052
146.521	9.0443		32.0237	8.35958		114.22	8.856
109.83	9.0572		52.3765	8.36364		60.1571	8.8673
50.9874	9.06281		40.107	8.38564		90.6171	8.9267
43.2517	9.06419		29.6529	8.40206		58.9235	8.9312
39.9075	9.1011		125.636	8.40367		74.7661	8.93834
65.0268	9.11706		57.3367	8.4075		123.495	8.95638
102.227	9.12075		109.786	8.40909		62.4807	8.98305
113.146	9.14924		90.7595	8.41667		96.1548	9.02719
111.046	9.16491		103.366	8.42718		124.104	9.0297
61.6395	9.18077		31.133	8.4383		78.6264	9.03429
69.3586	9.188		159.297	8.47089		146.485	9.0407
71.8877	9.19689		31.5622	8.47978		35.099	9.04187
54.6568	9.22172		115.434	8.52966		128.828	9.04478
51.0922	9.22744		28.5806	8.55056		127.53	9.04577
68.6143	9.25		75.4479	8.55462		81.244	9.05078
97.3412	9.28312		89.5873	8.55512		118.187	9.08684
84.8609	9.3133		141.528	8.55963		127.204	9.08997
116.649	9.31519		45.155	8.57267		58.9148	9.11207
144.388	9.32884		135.35	8.57466		41.1297	9.12668
133.963	9.35809		43.5537	8.57641		105.197	9.17824
96.1477	9.36863		55.107	8.58708		104.505	9.19923
75.4643	9.37097		200.898	8.59367		92.7765	9.19941
52.8919	9.37745		33.3123	8.60156		199.977	9.20349
120.898	9.39697		99.939	8.61538		94.9752	9.21495
42.3064	9.40756		39.7932	8.62944		207.458	9.22476
28.1055	9.41176		90.6651	8.67299		31.0251	9.2475
103.22	9.4247		44.8357	8.67797		199.902	9.25
93.8283	9.44008		140.557	8.68342		88.3853	9.26941
76.5375	9.44444		87.2927	8.6872		120.854	9.30026
155.967	9.45972		84.0457	8.68901		37.6336	9.30088
73.0966	9.47755		108.634	8.71154		81.3275	9.32872
13.5895	9.48724		131.176	8.71531		111.066	9.35371
35.875	9.55149		127.291	8.74719		57.6934	9.375
83.8174	9.55411		29.028	8.78328		190.847	9.38592
167.647	9.60211		103.409	8.78333		126.854	9.39863
65.0491	9.60619		124.037	8.78802		107.144	9.41503
8.16084	9.625		119.168	8.79412		116.756	9.42495
147.611	9.64337		29.4352	8.80795		46.0793	9.45614
66.6245	9.66296		31.3762	8.81175		12.793	9.47143
69.9397	9.68369		159.422	8.81915		36.233	9.47353
185.022	9.70492		50.0612	8.82849		77.7492	9.49342
77.8686	9.83206		149.93	8.84358		44.8279	9.49552
32.6318	9.84411		46.7449	8.84708		127.498	9.50455
118.01	9.8628		169.286	8.85672		18.7895	9.52016
65.4192	9.8678		45.6175	8.85886		49.8697	9.52174
84.905	9.87302		89.5199	8.86935		17.5247	9.52679
192.927	9.88489		62.247	8.8785		64.9402	9.53912
38.6696	9.91102		61.8567	8.88235		41.3415	9.57122
44.6762	9.94748		104.113	8.88535		34.533	9.57874
230.323	9.96324		78.3403	8.88627		34.6067	9.58182
47.5944	9.97967		31.3132	8.89437		76.4225	9.58796
144.794	10		103.68	8.89831		53.0892	9.60656
81.4819	10.0102		79.4063	8.89873		72.8877	9.6701
100.584	10.0353		75.1818	8.90948		137.655	9.67638
60.1264	10.0438		49.6811	8.91373		187.625	9.69004
106.027	10.046		161.531	8.92642		120.402	9.71182
27.3839	10.0557		140.005	8.93041		62.9132	9.71782
68.8791	10.0727		38.0088	8.93626		98.7027	9.73085
57.7803	10.073		115.87	8.93909		159.407	9.76386
91.4775	10.0797		19.2515	8.95413		129.419	9.7658
84.2667	10.13		66.0928	8.95821		53.1889	9.77311
105.307	10.133		61.1603	8.95902		128.701	9.77364
59.9182	10.1332		103.227	8.96053		24.3639	9.78338
55.7363	10.1499		48.1046	8.96296		13.9621	9.78818
68.3182	10.1765		89.0062	8.96646		73.2457	9.79012
79.3958	10.1784		66.4789	8.96859		29.3924	9.81271
116.634	10.1899		41.3341	8.9686		108.042	9.82635
123.069	10.1923		36.1215	8.96904		101.116	9.83772
59.8351	10.215		185.966	8.96947		34.9496	9.84231
143.138	10.2375		181.101	8.97674		59.3182	9.85577
86.1971	10.2381		32.8606	8.98833		132.206	9.88095
95.3209	10.2383		14.2836	9.02624		94.94	9.89552
92.9548	10.2393		55.5885	9.02863		19.104	9.92612
98.494	10.2425		69.0625	9.03072		90.951	9.93689
205.42	10.2439		83.1545	9.03552		79.2793	9.96253
34.7686	10.2451		75.995	9.04926		99.5687	9.97143
81.2614	10.2792		58.9515	9.0628		89.0676	9.98673
73.3565	10.2814		134.176	9.06667		111.63	9.98792
192.34	10.2921		72.0729	9.07843		151.261	10.0024
26.9977	10.2984		61.4319	9.08205		59.9788	10.007
118.116	10.3072		65.0562	9.08303		75.4416	10.0258
77.5517	10.3073		198.327	9.09797		86.8158	10.0489
40.7452	10.3623		39.5172	9.10526		29.3093	10.0588
72.5666	10.3775		114.535	9.10638		97.1722	10.0619
112.883	10.3823		80.7778	9.11013		17.0379	10.0628
71.8406	10.3986		32.8819	9.12531		128.691	10.0774
129.103	10.4176		37.9056	9.14309		45.3527	10.0924
82.4151	10.4178		80.1678	9.1457		146.966	10.0957
40.4305	10.4181		84.8225	9.15108		157.18	10.1191
113.945	10.4346		117.994	9.16134		55.4863	10.1534
131.933	10.4402		37.3352	9.16298		21.6486	10.1558
106.821	10.4515		70.666	9.1901		126.03	10.1588
92.1518	10.4521		85.8965	9.20772		36.7485	10.1606
69.7348	10.4597		118.169	9.21914		78.2811	10.1696
93.4378	10.5054		70.88	9.22606		27.0272	10.1899
160.173	10.5226		25.1511	9.22613		69.6198	10.1901
124.92	10.5266		91.6754	9.23563		69.9612	10.1921
90.2917	10.5326		170.24	9.23698		37.239	10.1921
63.7814	10.5673		107.146	9.24868		102.9	10.2012
49.2324	10.5687		102.431	9.27839		88.4184	10.2088
116.07	10.5728		53.0423	9.28736		67.6958	10.223
127.158	10.5734		140.732	9.30841		79.4104	10.237
79.307	10.5951		94.8212	9.31273		40.4516	10.2399
99.6298	10.6148		59.4958	9.31564		43.0975	10.2594
81.7143	10.6514		42.325	9.32407		129.081	10.2783
22.4492	10.6554		160.274	9.32514		37.5228	10.2809
99.3065	10.6821		61.9067	9.32565		73.5198	10.2827
52.8187	10.6835		132.301	9.33333		16.0912	10.2899
130.703	10.6967		12.574	9.33588		59.0839	10.2999
66.7782	10.7023		78.9961	9.33716		164.792	10.3125
39.618	10.7032		73.4884	9.37176		180.178	10.3184
155.422	10.7126		149.785	9.37273		110.505	10.3197
85.8208	10.7235		26.7976	9.37632		118.961	10.3223
68.6442	10.7254		94.4814	9.39009		107.524	10.3611
142.9	10.7267		92.566	9.39181		60.1098	10.3665
22.7413	10.7527		21.8946	9.39701		125.327	10.39
38.393	10.7564		69.6372	9.41471		133.339	10.3975
162.752	10.7659		169.466	9.42162		70.7787	10.416
25.1186	10.7706		21.5764	9.42407		83.1731	10.4464
36.1243	10.7713		17.6864	9.4292		92.8235	10.4554
22.8727	10.781		91.9964	9.44007		56.7426	10.4828
75.6359	10.7995		71.2971	9.44019		58.3429	10.4858
61.2036	10.8047		94.0933	9.44186		23.6868	10.4986
87.1172	10.814		117.811	9.4481		26.9443	10.5015
60.0593	10.8147		109.142	9.4533		64.6504	10.5198
30.0865	10.8383		48.7538	9.47547		26.2078	10.5309
29.7563	10.8505		56.9	9.48925		67.1493	10.5363
49.6936	10.8674		35.3621	9.49247		44.2677	10.5406
37.3218	10.881		29.0623	9.49716		48.9589	10.5418
145.169	10.8828		86.8992	9.49799		183.674	10.5419
146.047	10.9		52.6284	9.49833		37.5444	10.5481
128.395	10.9118		69.8984	9.49837		28.8027	10.5593
126.304	10.917		108.987	9.50888		98.6296	10.5714
143.591	10.9385		47.5294	9.5102		23.0772	10.575
86.6379	10.948		126.386	9.51395		44.3673	10.5769
94.8612	10.9542		78.0242	9.51497		65.6838	10.5824
33.7452	10.9726		47.7204	9.53953		134.506	10.5915
147.383	10.9731		153.054	9.54392		125.804	10.606
107.946	10.9735		68.8014	9.55404		18.6858	10.6099
146.573	10.9752		104.891	9.55882		71.952	10.6217
166.218	10.9921		94.8489	9.55911		72.9875	10.6222
78.8916	10.994		33.4756	9.5618		55.6777	10.6268
50.2404	11		136.421	9.56425		65.6442	10.6326
51.3014	11.0112		132.332	9.5678		120.488	10.6371
25.4469	11.0255		84.9938	9.57407		161.873	10.6437
115.453	11.0377		75.8106	9.58744		121.701	10.6569
87.3828	11.0379		45.7292	9.59107		16.86	10.6944
37.239	11.0402		60.7845	9.5978		106.056	10.6959
99.0504	11.0417		149.411	9.60305		162.026	10.7007
60.1098	11.0632		85.8369	9.60423		69.8809	10.7354
26.1221	11.0767		34.8128	9.61359		60.5222	10.7427
69.8097	11.089		96.687	9.62834		149.134	10.7463
72.5855	11.0932		35.2094	9.64118		124.902	10.7508
145.989	11.1117		40.9383	9.64307		36.459	10.7523
156.548	11.1171		73.4486	9.64308		32.3375	10.7545
86.8082	11.1285		142.91	9.64789		80.1981	10.7734
186.88	11.1362		28.6687	9.64897		31.9058	10.7799
101.005	11.1416		69.9532	9.65661		67.8679	10.7904
143.649	11.1965		62.8261	9.67148		122.888	10.7924
99.559	11.2017		129.423	9.675		110.925	10.8
123.735	11.2044		156.278	9.67532		47.6427	10.8161
47.6457	11.2567		94.4688	9.68739		110.741	10.8168
100.716	11.2662		45.5224	9.69565		34.5739	10.8174
77.9595	11.2735		41.3983	9.69957		26.7582	10.8367
65.1111	11.2766		24.8526	9.70115		86.7781	10.8621
79.8585	11.2854		33.2967	9.71598		100.84	10.8641
61.4198	11.2891		24.0898	9.71779		36.6023	10.8732
106.368	11.3027		31.4313	9.71948		141.988	10.8744
114.815	11.3038		68.8738	9.7343		143.115	10.885
47.6782	11.3092		128.415	9.73815		167.601	10.9022
44.6232	11.3154		107.21	9.73988		108.758	10.9024
50.5	11.3285		100.595	9.74771		109.279	10.9082
56.1247	11.3302		22.6366	9.75301		57.972	10.9167
61.0178	11.3353		131.699	9.75332		107.005	10.9212
72.6477	11.3356		33.4786	9.75637		63.0747	10.9223
64.3114	11.3489		85.8727	9.76018		63.4569	10.9322
68.632	11.3502		34.8929	9.76438		47.3135	10.9368
72.3383	11.3527		135.972	9.77037		163.292	10.945
142.935	11.3569		38.0112	9.77285		118.849	10.9466
36.4891	11.3641		52.9882	9.77778		40.7247	10.9608
85.106	11.373		54.1576	9.78125		137.893	10.9646
95.416	11.3846		57.1435	9.78357		80.8259	10.9854
104.198	11.3859		152.754	9.78439		38.0235	11.0235
146.487	11.403		178.924	9.78851		30.7257	11.0342
94.2784	11.406		44.4837	9.8103		31.2528	11.0554
129.772	11.4096		73.9288	9.81419		51.1716	11.0568
148.087	11.4149		129.245	9.8162		41.6929	11.0576
83.5115	11.4508		52.8997	9.82621		31.8673	11.0579
101.073	11.4758		101.522	9.83446		52.3373	11.08
151.768	11.4833		111.256	9.83654		148.531	11.0889
74.3294	11.5012		121.991	9.84211		31.0221	11.1078
85.1794	11.5015		144.288	9.85399		110.095	11.1085
95.4561	11.5021		59.9438	9.85475		42.0952	11.1101
95.0436	11.5026		24.334	9.85624		55.5224	11.1667
35.6599	11.5129		86.7349	9.87173		105.321	11.1712
48.1295	11.5144		67.4481	9.87415		50.5634	11.1881
79.5121	11.5195		99.4766	9.87565		43.3221	11.1958
133.386	11.5294		55.8249	9.88101		89.9203	11.1994
141.88	11.536		156.512	9.88854		59.5016	11.2078
40.459	11.5403		141.642	9.8894		45.6618	11.2088
23.0896	11.5416		86.7752	9.90265		110.849	11.2115
103.807	11.5543		187.998	9.91325		189.938	11.25
127.497	11.5621		47.2243	9.91375		54.782	11.2522
94.0906	11.5741		58.3917	9.9169		133.608	11.2559
165.575	11.5742		35.0962	9.91781		85.9444	11.266
108.592	11.5798		43.438	9.92077		227.094	11.2696
153.514	11.63		25.2791	9.92978		143.267	11.2759
113.346	11.6414		73.3061	9.93717		76.0871	11.3099
120.455	11.6434		140.857	9.9375		106.483	11.3333
103.061	11.6541		72.8567	9.94195		128.686	11.3628
46.4935	11.681		123.182	9.94324		54.0791	11.3656
137.991	11.6941		26.6732	9.94678		169.097	11.372
10.8619	11.698		159.456	9.95312		119.728	11.3837
91.3744	11.7014		113.821	9.95735		89.5441	11.3854
180.353	11.7097		99.6341	9.95826		24.8795	11.3996
59.0479	11.7206		116.922	9.95866		82.2072	11.4072
130.19	11.7288		48.0865	9.95957		48.6338	11.4109
107.923	11.7293		35.6081	9.97059		68.2111	11.4275
109.963	11.7314		187.618	9.97462		61.088	11.4409
206.251	11.739		31.2692	9.97701		59.9695	11.4424
30.3442	11.7463		38.4447	9.98109		68.5406	11.4485
49.4434	11.7608		122.267	9.98715		26.493	11.4642
83.1676	11.8005		80.3529	9.99099		77.7938	11.4709
54.3557	11.8088		151.955	10		49.1976	11.4724
214.125	11.8207		62.4093	10.0138		116.149	11.4955
91.2036	11.8452		82.5645	10.0192		41.5073	11.4958
106.535	11.8608		66.5827	10.0235		78.5947	11.4978
71.659	11.8889		78.4077	10.0307		125.664	11.5
61.1204	11.9041		129.769	10.0308		122.839	11.5012
145.327	11.9306		85.9872	10.0466		98.935	11.5029
63.7023	11.9446		50.7114	10.0537		102.874	11.5087
122.499	11.9519		108.471	10.0543		187.727	11.5143
134.678	12.0077		91.6345	10.0549		83.8764	11.5148
132.189	12.0132		29.2522	10.0559		58.9335	11.528
141.587	12.0245		97.7404	10.0636		79.4708	11.5291
56.7474	12.0309		110.309	10.0692		90.8397	11.542
37.295	12.0316		75.2291	10.0696		60.5801	11.5541
49.4554	12.0394		120.285	10.0727		27.6554	11.5579
13.7364	12.0415		46.1631	10.0909		68.7397	11.558
46.1429	12.0426		49.3917	10.0922		21.2305	11.5649
109.19	12.0512		184.254	10.1007		173.368	11.5692
41.9479	12.0617		37.48	10.1142		91.8575	11.5714
57.5	12.0823		111.269	10.1214		93.3985	11.5943
98.9977	12.0826		24.363	10.1224		77.7766	11.5977
110.498	12.0923		65.9905	10.128		54.3149	11.5987
143.253	12.1093		30.9965	10.1324		71.8198	11.6053
14.6364	12.1329		109.311	10.1526		98.1234	11.6167
111.642	12.1336		114.112	10.1569		80.0268	11.6238
18.7581	12.1353		180.317	10.1695		92.0542	11.6329
168.266	12.1395		170.367	10.1746		59.8961	11.6368
120.398	12.1484		63.0732	10.178		137.634	11.6381
16.6969	12.1701		44.1477	10.1803		21.5488	11.6387
102.966	12.1713		43.1772	10.183		12.5064	11.6511
179.01	12.1759		28.2363	10.1877		71.7286	11.6687
20.1995	12.185		83.6355	10.1894		132.363	11.6701
23.1452	12.198		14.9857	10.1939		164.498	11.6835
110.751	12.2179		137.8	10.194		128.085	11.6904
78.4569	12.2218		119.192	10.2053		60.6373	11.6933
70.899	12.2428		46.8209	10.2147		39.5515	11.6954
109.918	12.2483		28.4548	10.2165		27.6194	11.697
171.988	12.2514		26.7586	10.2189		24.6595	11.708
103.784	12.2825		56.3494	10.2192		128.838	11.7096
149.793	12.2868		117.126	10.2219		29.1735	11.7125
156.536	12.2994		55.8487	10.2282		64.599	11.7171
141.123	12.3104		66.3607	10.2324		72.6799	11.7204
112.123	12.3544		84.2785	10.2353		156.609	11.7286
56.9517	12.3561		56.8046	10.2384		56.6973	11.7331
23.0896	12.3569		82.1785	10.2417		29.653	11.7337
59.0095	12.3802		36.1414	10.247		55.571	11.7388
99.662	12.3906		34.5459	10.2477		72.1349	11.7406
122.248	12.4		72.2358	10.2507		106.712	11.7588
117.731	12.413		113.598	10.2544		90.4142	11.7855
141.557	12.423		104.364	10.2619		65.3442	11.7859
174.548	12.4685		172.752	10.2646		76.9437	11.791
40.2124	12.4772		60.3669	10.2648		96.3083	11.7913
83.1021	12.4836		128.084	10.2702		102.714	11.7953
50.7724	12.4904		55.1033	10.2778		146.602	11.8088
84.1478	12.5085		93.3469	10.2793		115.592	11.8089
124.737	12.5121		45.8426	10.287		181.707	11.8203
99.1065	12.5125		30.8903	10.2912		89.7852	11.8212
116.206	12.5303		117.136	10.2971		143.83	11.8225
157.237	12.5478		108.426	10.2973		46.2643	11.8293
11.6156	12.5502		152.95	10.3086		100.833	11.8333
133.535	12.5522		45.512	10.3106		32.3633	11.8363
32.8045	12.5985		47.5528	10.3119		144.008	11.8387
113.793	12.5993		32.4459	10.3196		94.0433	11.8475
103.777	12.6062		33.1161	10.328		27.3872	11.8497
90.157	12.625		62.7	10.3296		29.1837	11.85
67.2669	12.628		111.948	10.3313		57.6432	11.8517
15.2603	12.6298		18.1558	10.3385		46.187	11.8517
190.837	12.6309		59.3445	10.3504		100.669	11.8746
140.895	12.6336		45.3884	10.3518		105.397	11.8796
39.723	12.6408		101.616	10.3548		134.684	11.8927
88.3374	12.6531		42.6065	10.3548		27.7704	11.8968
44.6371	12.6536		82.956	10.3611		125.014	11.9006
103.583	12.658		85.7975	10.3714		90.7146	11.917
39.2542	12.6612		95.1914	10.3731		145.675	11.9426
37.5	12.6643		108.441	10.3756		45.4444	11.9537
108.205	12.679		27.7845	10.3798		18.5505	11.9625
61.1	12.6915		35.6857	10.3846		34.1395	11.9659
91.1682	12.7025		81.8824	10.3951		10.5439	11.9714
164.843	12.7115		130.122	10.4045		69.5569	11.9751
36.7357	12.7128		45.5556	10.4051		26.3592	11.9761
113.075	12.7143		34.6828	10.4089		79.2301	11.9865
68.0248	12.7256		116.89	10.4095		22.0669	11.9972
90.0751	12.7292		212.755	10.411		43.9025	12
61.4809	12.7293		102.579	10.4164		64.4211	12.0105
116.966	12.7338		187.06	10.4197		125.721	12.0136
30.434	12.7468		47.6061	10.4198		119.882	12.021
30.9	12.7549		144.673	10.4203		16.4798	12.0248
120.185	12.7562		37.0325	10.4226		17.9598	12.0348
91.7068	12.7593		35.6799	10.4318		54.1406	12.0398
32.4505	12.7673		71.2736	10.4383		65.9243	12.0438
127.708	12.7704		108.333	10.4404		106.319	12.0459
45.109	12.7771		118.822	10.4419		90.3541	12.0492
98.8827	12.7783		45.5317	10.4451		54.4193	12.0519
96.9671	12.8153		32.8516	10.4471		118.959	12.0552
146.114	12.8571		55.2329	10.4475		77.1591	12.0662
56.1862	12.8642		83.3507	10.4491		126.372	12.0677
104.309	12.8723		73.367	10.4521		75.035	12.0722
94.0809	12.8767		174.323	10.4586		56.5874	12.0756
79.3823	12.9165		73.2015	10.4611		79.065	12.0838
49.8837	12.9375		78.1091	10.4615		54.8736	12.106
32.7622	12.9412		127.307	10.4653		130.501	12.1085
65.8035	12.9455		71.4282	10.4718		24.1574	12.1152
143.609	12.9872		26.9812	10.4781		85.9201	12.1331
71.6199	12.9893		18.8648	10.479		85.0928	12.1487
159.736	12.992		132.014	10.482		23.4454	12.1542
108.956	13.0106		33.4525	10.487		169.732	12.1553
175.391	13.0147		78.7755	10.5026		142.778	12.157
143.683	13.0274		36.3705	10.5075		92.055	12.1694
221.291	13.0292		39.8152	10.5101		64.8588	12.1816
105.545	13.032		149.857	10.5152		184.988	12.2029
20.1716	13.0492		59.5943	10.5153		86.4266	12.2034
133.588	13.052		74.5094	10.5169		42.3416	12.2036
16.9501	13.0522		65.6188	10.5191		139.964	12.207
66.4211	13.0633		49.4894	10.5289		36.31	12.2226
22.1936	13.0879		104.124	10.5352		83.0224	12.2308
59.3447	13.0893		90.394	10.5369		72.1911	12.2364
17.8811	13.0997		97.844	10.538		70.1961	12.2588
26.3411	13.1008		146.177	10.5389		87.756	12.2595
138.29	13.1111		140.103	10.5392		99.2569	12.2623
52.1047	13.1301		67.465	10.5401		137.842	12.263
141.685	13.1323		164.022	10.5542		83.6436	12.2664
124.397	13.1351		87.3781	10.5545		128.919	12.2689
166.862	13.1376		38.9542	10.5635		110.812	12.2725
40.6601	13.1429		81.5597	10.5673		84.0794	12.2761
72.9398	13.1581		121.383	10.5702		24.9764	12.2772
52.6166	13.1988		32.518	10.571		83.1355	12.2827
74.5603	13.2016		118.01	10.5718		131.973	12.3182
132.956	13.2042		73.0917	10.5742		106.386	12.322
101.858	13.2109		51.4891	10.5839		82.604	12.3256
163.36	13.2315		61.7311	10.5873		34.791	12.3333
97.9642	13.2362		47.6533	10.5929		115.025	12.3333
36.4362	13.2396		115.323	10.5952		170.022	12.3401
77.15	13.2479		131.993	10.5958		74.2044	12.3498
82.8309	13.2606		165.843	10.596		128.196	12.359
113.556	13.2625		132.449	10.5974		76.3655	12.3596
150.842	13.2629		91.2141	10.6029		166.571	12.3647
99.8577	13.2646		174.36	10.6038		161.24	12.3681
120.148	13.2671		67.5406	10.6064		143.801	12.3714
119.236	13.2762		88.7875	10.6102		49.7743	12.375
78.1383	13.2943		25.6919	10.6173		36.373	12.377
88.624	13.2959		152.659	10.618		37.1864	12.3873
212.775	13.3196		56.9	10.6209		157.675	12.4099
88.7451	13.3208		70.0404	10.6239		64.7357	12.413
82.7839	13.3229		25.7729	10.6243		86.012	12.4239
113.115	13.3266		133.505	10.6267		110.473	12.4298
124.297	13.3367		75.5845	10.6296		119.39	12.4329
68.8956	13.3478		143.956	10.6376		72.1275	12.4417
94.3131	13.36		124.617	10.6455		57.5982	12.4457
166.842	13.3657		162.38	10.6514		192.081	12.4545
103.509	13.3728		57.4581	10.6537		53.23	12.4618
141.861	13.3797		18.5092	10.6548		58.8125	12.5022
74.2408	13.3869		89.0171	10.6591		134.734	12.5056
122.676	13.4019		122.834	10.6642		161.05	12.5219
14.9029	13.4031		41.5919	10.6646		106.238	12.5284
97.3396	13.4082		42.8503	10.6706		92.2477	12.5308
72.1008	13.4147		82.5537	10.6751		139.847	12.5369
56.5378	13.4299		86.99	10.6782		102.262	12.543
108.27	13.4579		142.628	10.6829		47.8318	12.545
57.8189	13.4581		86.3717	10.6888		174.956	12.5495
39.1656	13.4716		75.6119	10.6912		21.2667	12.5537
142.195	13.4898		85.8716	10.6929		101.811	12.5597
130.104	13.5012		60.3477	10.6939		36.0351	12.5691
154.19	13.5097		103.894	10.6944		167.234	12.5764
67.2665	13.5139		108.376	10.6992		91.8732	12.5791
180.77	13.5211		57.3153	10.6994		96.4589	12.5806
129.98	13.5302		105.474	10.7004		55.5356	12.5864
121.05	13.5311		31.0699	10.7037		120.89	12.5884
134.02	13.5409		23.3341	10.7122		93.0381	12.5973
54.4625	13.5448		59.3737	10.7133		86.991	12.5988
92.245	13.5484		19.7699	10.7137		83.8505	12.599
161.438	13.5518		67.5021	10.7155		70.7918	12.5996
77.9466	13.5598		45.2276	10.7216		17.9809	12.6123
75.3451	13.5639		26.3746	10.7255		120.254	12.6471
95.5734	13.5659		77.426	10.7338		112.823	12.6598
149.993	13.586		117.215	10.7354		183.361	12.6811
84.9383	13.5868		55.7211	10.7375		75.7888	12.6921
124.398	13.6004		33.5818	10.7379		48.873	12.6944
12.6442	13.6022		75.8374	10.7409		63.4314	12.6992
55.1467	13.6027		43.7465	10.7416		176.449	12.7038
61.3255	13.6081		126.268	10.7478		44.8526	12.7206
196.867	13.6378		30.0871	10.753		144.465	12.7234
74.6644	13.6393		26.839	10.7543		42.9926	12.7457
88.8557	13.6422		22.9916	10.7577		134.771	12.7477
77.478	13.658		35.1451	10.7585		194.74	12.7602
107.555	13.6626		99.7991	10.7614		53.0375	12.7747
113.192	13.6647		165.282	10.7615		51.029	12.7774
105.167	13.6692		75.7599	10.7705		16.0855	12.7806
36.6657	13.6895		139.662	10.7709		149.512	12.7826
90.8298	13.6936		149.967	10.7805		58.8451	12.7972
80.279	13.7111		84.537	10.7844		100.632	12.8014
63.9244	13.7409		103.053	10.7975		25.4249	12.8099
117.9	13.7715		41.1647	10.8		60.1935	12.8174
166.467	13.7757		53.393	10.8054		38.5142	12.8257
109.959	13.7812		83.6916	10.8098		157.885	12.8274
107.863	13.7851		87.2427	10.8103		89.0299	12.8466
98.9801	13.7965		34.1893	10.8327		163.378	12.8473
137.201	13.8231		57.6646	10.8328		26.5647	12.8478
56.4751	13.8367		40.4176	10.8333		115.04	12.8553
71.5994	13.8438		189.045	10.8408		30.0428	12.9056
96.6521	13.8762		43.0723	10.8609		129.882	12.9164
190.336	13.8803		40.8496	10.8729		225.542	12.9192
76.2246	13.8938		117.876	10.8748		19.7773	12.9194
99.3138	13.9141		40.5852	10.875		50.7254	12.9274
23.1054	13.9268		42.5258	10.878		25.7619	12.929
146.841	13.9306		108.348	10.881		47.4597	12.933
135.701	13.9335		35.8466	10.8817		62.1152	12.9356
41.7098	13.9616		80.2849	10.883		26.8149	12.9387
155.869	13.9702		60.1677	10.8885		103.689	12.9432
127.691	14.0092		52.249	10.8938		127.828	12.9448
127.184	14.0133		100.018	10.8985		55.217	12.9475
40.2792	14.0161		84.2226	10.9028		127.133	12.9627
37.7966	14.0196		109.175	10.9065		119.876	12.9717
148.67	14.0275		22.2184	10.9184		44.1538	12.9721
71.0144	14.0422		202.279	10.9191		44.6111	12.9861
87.3866	14.0486		140.042	10.9197		60.4711	13.0206
199.261	14.0951		147.447	10.9208		30.3842	13.0233
90.4723	14.1295		33.5772	10.9277		91.1622	13.0353
133.939	14.1306		54.3016	10.9335		24.0185	13.0394
56.7354	14.1323		84.7281	10.9388		234.086	13.0448
127.228	14.1381		80.0065	10.9418		107.41	13.0464
15.4958	14.1423		78.7069	10.9425		177.227	13.0473
43.8175	14.1536		24.1852	10.952		80.8038	13.0474
169.447	14.1576		108.43	10.9521		34.3684	13.0637
162.758	14.1684		14.5572	10.9532		294.336	13.0707
88.6578	14.1707		76.3621	10.958		30.7355	13.0742
69.3874	14.1753		55.1479	10.9588		48.1069	13.086
103.685	14.1954		107.783	10.9614		39.9868	13.087
60.319	14.23		135.939	10.9671		63.4157	13.0912
58.4346	14.2411		34.3428	10.9805		157.928	13.1074
123.446	14.2473		76.4951	10.9813		110.844	13.1093
140.828	14.2511		36.5335	10.982		142.435	13.1131
140.78	14.2662		35.7751	10.988		78.491	13.1358
57.052	14.2685		32.9121	10.9948		36.5605	13.1382
99.7328	14.2694		64.8992	10.9949		142.777	13.1414
118.922	14.2751		165.792	11		19.6688	13.1486
47.2774	14.2811		55.8723	11.0018		57.285	13.1509
73.4969	14.287		53.7889	11.0072		123.73	13.1645
164.743	14.2878		80.257	11.0075		62.2293	13.1649
44.1034	14.2988		28.3616	11.0156		180.648	13.1852
95.0654	14.3227		56.3236	11.0181		89.833	13.1911
96.4058	14.3373		75.9558	11.0205		67.1165	13.1927
29.042	14.342		17.2205	11.0226		42.8505	13.2236
123.25	14.351		41.8105	11.0319		126	13.2446
37.3559	14.3531		40.6131	11.0327		33.1763	13.2486
103.807	14.3619		24.0767	11.0335		43.5983	13.25
64.4206	14.3754		150.775	11.0345		165.814	13.2511
120.966	14.3878		150.752	11.0345		32.2837	13.2574
90.4626	14.3897		50.4646	11.0349		79.9485	13.2607
103.069	14.3927		57.8639	11.0366		20.2244	13.2765
164.232	14.4056		151.015	11.0374		103.869	13.2774
105.74	14.4108		43.0207	11.0459		108.48	13.2802
87.6353	14.4234		39.7065	11.0483		30.6374	13.286
99.5455	14.4378		192.907	11.0486		52.8491	13.2879
68.8482	14.4381		113.317	11.0526		137.57	13.2956
136.033	14.4452		121.875	11.0602		69.1774	13.298
95.1802	14.4473		41.7597	11.0669		118.551	13.3103
59.8024	14.4487		113.537	11.0733		91.5938	13.313
66.9353	14.4524		128.701	11.0744		103.133	13.3165
153.474	14.4618		121.378	11.078		147.681	13.3718
79.5848	14.4822		28.7249	11.0829		42.4025	13.425
209.639	14.4844		90.92	11.084		28.5152	13.4267
144.223	14.5011		65.5703	11.0864		50.3736	13.4296
164.07	14.5246		65.8321	11.0879		34.3234	13.4297
95.9013	14.5326		60.9671	11.0879		31.7097	13.4312
89.0227	14.5506		31.6648	11.0891		77.9755	13.438
74.8938	14.5585		155.842	11.0919		75.1618	13.4489
89.6457	14.5711		88.4257	11.0984		74.3663	13.4535
59.2558	14.5714		37.688	11.1076		119.172	13.4556
148.715	14.5933		87.886	11.1137		57.4512	13.46
131.522	14.6		190.557	11.125		88.2741	13.4615
162.408	14.6039		103.096	11.1303		26.5283	13.4749
41.3248	14.6073		81.6848	11.1377		96.7235	13.4857
66	14.6133		41.1156	11.1386		42.8536	13.5104
99.44	14.6135		108.542	11.1407		25.52	13.5216
119.87	14.631		47.9867	11.1419		62.86	13.5326
82.3364	14.6386		124.32	11.1484		30.4531	13.5421
108.822	14.6505		152.203	11.1566		156.434	13.5534
14.9465	14.6525		31.3351	11.1617		121.907	13.5566
99.3879	14.6615		37.4656	11.1623		146.394	13.5603
122.91	14.6811		53.9032	11.1725		104.83	13.5675
120.829	14.7048		69.5359	11.1803		181.062	13.5686
21.382	14.7398		118.996	11.1818		109.2	13.5793
59.7284	14.7523		50.8261	11.1877		39.4757	13.5801
222.826	14.7564		15.7319	11.1884		90.8662	13.5833
125.879	14.7565		156.289	11.1896		51.3035	13.587
105.104	14.7724		100.321	11.1898		119.502	13.5887
174.248	14.7812		35.8723	11.1917		93.8768	13.605
110.935	14.7818		73.1784	11.1919		55.8893	13.6171
61.412	14.7855		44.9226	11.1938		195.794	13.6299
47.1128	14.8085		168.111	11.1946		60.3309	13.6327
132.441	14.8131		47.0873	11.1993		41.7885	13.6379
138.963	14.8143		188.849	11.1995		42.8567	13.6391
35.0396	14.8164		38.8206	11.2046		115.977	13.6462
126.547	14.8275		138.94	11.2178		82.8133	13.6486
104.333	14.8318		22.3697	11.2228		24.4149	13.6737
94.5735	14.838		155.69	11.226		95.1737	13.6799
53.8501	14.878		37.4011	11.2271		138.573	13.6988
82.0282	14.8852		51.1129	11.2279		228.871	13.7089
48.6842	14.8942		30.777	11.2297		78.0734	13.711
82.1556	14.8953		86.8651	11.2342		39.3425	13.7149
112.316	14.9105		76.3849	11.2384		26.7262	13.7218
20.5773	14.9154		82.1446	11.2416		40.2828	13.7288
143.65	14.9375		24.478	11.2432		28.0129	13.73
186.076	14.9638		96.572	11.2467		63.9712	13.7413
65.7902	14.9913		67.0216	11.252		29.2712	13.7549
116.528	15.0043		61.4327	11.2526		29.5618	13.7641
146.419	15.0163		82.0493	11.2568		142.258	13.7698
106.486	15.026		118.667	11.2623		93.3688	13.7701
29.9544	15.0379		95.1885	11.2661		137.209	13.7801
37.8987	15.0383		24.9649	11.2682		22.659	13.7846
97.5779	15.0441		66.61	11.2696		107.108	13.7922
158.572	15.0665		49.5011	11.271		96.7712	13.7961
135.802	15.0813		143.188	11.2837		143.176	13.8021
69.0701	15.1143		97.4286	11.2841		61.1038	13.8047
130.864	15.1373		115.58	11.2853		41.9839	13.8187
54.9573	15.1376		91.8287	11.3066		59.9182	13.8411
111.599	15.148		28.6745	11.3081		73.7759	13.8517
30.6162	15.1573		51.7912	11.3158		102.879	13.8673
124.732	15.176		26.2377	11.3175		54.7609	13.8701
49.1284	15.1967		57.8668	11.3237		124.308	13.8792
172.296	15.201		113.092	11.329		50.136	13.8807
76.7354	15.2042		45.201	11.3304		61.2587	13.8877
134.916	15.2247		79.0188	11.334		201.502	13.8925
92.4321	15.2379		94.2706	11.3364		37.0423	13.8929
40.7302	15.239		186.797	11.3384		182.349	13.9024
56.2371	15.2424		77.6466	11.3433		33.0644	13.9043
85.6236	15.2461		90.182	11.3535		104.207	13.911
78.9228	15.2493		163.172	11.3556		37.9396	13.915
247.283	15.2566		174.222	11.3604		80.7482	13.9295
85.0432	15.27		173.397	11.3715		134.639	13.9301
168.052	15.3079		82.941	11.3758		21.0938	13.9302
180.891	15.3079		60.9249	11.3769		65.7644	13.9338
94.3023	15.3103		44.1258	11.3822		115.784	13.9394
88.201	15.3291		66.2426	11.3824		49.7815	13.9425
102.334	15.3371		149.117	11.3835		120.01	13.9459
148.523	15.3528		86.9701	11.3917		49.434	13.9475
122.287	15.369		38.933	11.4104		176.192	13.9602
160.871	15.3695		58.7879	11.4157		67.0618	13.9717
71.6721	15.3721		116.942	11.4178		67.1078	13.9791
139.842	15.3785		20.1591	11.4212		126.795	13.9793
83.5232	15.3911		103.641	11.4213		14.7486	13.9796
53.2158	15.3942		141.69	11.4216		105.744	13.9987
112.275	15.4278		147.166	11.4225		45.5323	14.0079
153.472	15.4327		25.346	11.4267		191.839	14.0192
79.2071	15.4449		83.4956	11.4294		37.6384	14.0226
236.224	15.4465		49.5125	11.4361		141.597	14.0305
106.618	15.4586		59.008	11.4385		55.2328	14.0318
151.598	15.4601		31.4414	11.4418		67.0519	14.0383
41.6656	15.4732		87.8186	11.444		59.2646	14.0501
33.2368	15.5287		132.973	11.4493		98.786	14.0635
138.497	15.5551		98.6994	11.457		41.7865	14.0659
119.107	15.5772		131.786	11.4605		59.1864	14.0742
78.9032	15.5887		99.9729	11.4618		94.5078	14.0789
88.2555	15.616		35.1178	11.4759		77.4094	14.089
83.914	15.6218		72.3707	11.4791		85.1222	14.0923
115.733	15.6242		68.9914	11.4814		129.486	14.0925
73.4521	15.6522		97.2456	11.4824		148.594	14.0987
156.036	15.6651		84.0842	11.4828		173.214	14.1008
111.67	15.6707		150.505	11.4938		19.5251	14.1234
59.8009	15.7143		84.2323	11.4957		19.4147	14.127
119.43	15.7175		38.9136	11.5		82.6083	14.1364
123.429	15.744		78.5353	11.5043		41.9395	14.156
30.0651	15.76		67.1549	11.5053		92.7138	14.1609
131.95	15.7617		38.8427	11.5074		60.1872	14.1639
102.44	15.7734		24.1054	11.5084		107.7	14.1645
73.2049	15.7775		118.031	11.5111		86.1443	14.1807
19.8947	15.8352		101.788	11.5111		58.8658	14.1867
95.8708	15.8511		93.9471	11.512		278.667	14.1938
118.291	15.8741		60.2443	11.5143		69.1409	14.1964
64.0972	15.8829		100.935	11.5204		23.8741	14.2059
226.635	15.8987		22.554	11.5214		49.4604	14.2065
109.882	15.9171		23.0189	11.5235		107.268	14.2075
146.335	15.9701		176.731	11.5242		97.7206	14.2188
133.668	15.9774		44.2012	11.5325		95.4298	14.2333
54.4882	15.9835		129.944	11.5337		107.648	14.2366
42.019	15.9847		110.051	11.5343		120.827	14.2437
98.5911	15.9945		36.2808	11.5359		137.606	14.2618
22.4048	16.0145		76.5103	11.542		113.542	14.2623
154.157	16.0257		104.797	11.5429		70.6816	14.2637
121.48	16.0431		23.6974	11.5473		32.6275	14.2724
54.1801	16.0679		64.6649	11.5581		124.37	14.2821
96.9286	16.0937		145.788	11.5671		181.128	14.2832
212	16.1076		154.924	11.5677		137.088	14.2845
80.4954	16.1194		42.1902	11.5699		125.799	14.2853
90.9385	16.1219		136.904	11.5826		101.464	14.2891
92	16.1282		144.94	11.5855		46.1508	14.31
26.4607	16.1354		165.831	11.5882		173.036	14.3116
114.459	16.1673		97.3857	11.5927		45.4669	14.3132
6.71094	16.1737		53.0256	11.5938		26.9565	14.3154
102.951	16.2067		193.982	11.5954		95.1658	14.3273
74.176	16.2466		158.011	11.6011		36.7662	14.3405
43.4043	16.2473		75.3754	11.609		13.5404	14.3519
21.3138	16.2542		97.7724	11.6103		196.882	14.3551
82.4354	16.2646		146.375	11.6103		98.2086	14.3626
99.2217	16.2925		106.515	11.6104		96.1489	14.3633
187.331	16.2954		34.1748	11.6114		111.449	14.3825
154.207	16.3052		124.23	11.6293		54.4464	14.3898
147.33	16.3057		145.836	11.6295		74.9124	14.4172
119.362	16.3085		57.2833	11.631		80.6899	14.4245
66.0572	16.3217		58.3785	11.6323		24.819	14.4282
60.3217	16.3503		153.905	11.6327		121.767	14.4286
84.0778	16.3533		69.6377	11.6373		22.9434	14.4295
182.528	16.393		140.037	11.6376		107.55	14.4458
132.494	16.4029		159.859	11.6385		215.127	14.4486
48.6536	16.4091		52.5267	11.6396		139.878	14.4621
54.8833	16.4119		89.6901	11.6465		158.755	14.4729
109.515	16.4317		50.776	11.6467		155.792	14.4737
66.2601	16.4401		108.776	11.6502		221.587	14.4784
135.136	16.4419		73.2449	11.6506		33.9055	14.4965
98.6225	16.4453		72.2215	11.6535		66.4438	14.5121
84.7811	16.4512		91.8288	11.6655		48.9038	14.5137
85.9478	16.452		79.8869	11.6701		92.3042	14.5138
37.6441	16.4566		67.5139	11.6731		21.7521	14.5163
98.1792	16.4594		76.9775	11.6749		54.9784	14.5345
161.585	16.4615		93.365	11.6766		22.2286	14.5467
75.4841	16.4621		109.643	11.6818		45.2317	14.5649
92.2017	16.4813		90.0214	11.6818		95.4098	14.5673
119.09	16.507		94.6086	11.6829		51.0843	14.5722
104.342	16.5113		136.249	11.6833		101.378	14.5884
114.02	16.5305		156.417	11.692		38.4387	14.5924
101.157	16.5433		90.9608	11.6944		140.875	14.5928
108.031	16.5494		50.8153	11.6959		141.32	14.5956
175.352	16.5544		61.8055	11.6989		123.92	14.6032
140.674	16.5746		73.6589	11.7086		98.7273	14.6071
112.345	16.5787		33.7327	11.7101		121.345	14.6779
107.112	16.5965		65.183	11.7116		128.879	14.6786
87.6963	16.6059		157.101	11.7125		50.6104	14.6939
132.453	16.6498		112.471	11.7147		49.3085	14.7029
65.6219	16.6551		88.7718	11.7149		157.72	14.7297
63.5917	16.6979		157.786	11.7229		129.179	14.7337
45.3256	16.7189		39.0316	11.7234		99.0095	14.7422
175.997	16.7218		112.562	11.7255		142.568	14.7549
48.8787	16.7223		130.255	11.7303		108.146	14.755
116.641	16.731		55.4868	11.7335		120.49	14.761
63.4814	16.7512		56.0444	11.7404		46.539	14.7624
80.9219	16.7549		81.2994	11.743		127.674	14.7659
130.572	16.758		104.377	11.75		15.4362	14.7702
158.114	16.7696		27.316	11.7519		113.805	14.7714
39.5495	16.8287		75.0941	11.752		30.0673	14.7785
104.232	16.8296		94.2528	11.7594		41.5415	14.7886
52.5016	16.8368		30.1974	11.7636		135.561	14.7939
26.9199	16.8419		60.7153	11.7717		76.3463	14.8
166.444	16.847		48.6758	11.7754		122.113	14.8048
123.273	16.8554		80.5201	11.7791		38.2037	14.8176
100.296	16.8711		141.309	11.7794		151.022	14.819
72.1037	16.8801		79.5344	11.7818		144.069	14.8489
70.2681	16.8829		54.997	11.7886		57.6812	14.8575
170.601	16.8842		46.8739	11.7904		82.5345	14.8673
34.2015	16.8967		79.945	11.7917		25.2438	14.8711
123.074	16.9038		126.352	11.7975		52.4723	14.8732
104.241	16.9195		71.9852	11.7993		126.38	14.8919
106.68	16.9306		33.2664	11.8008		48.0299	14.8996
84.4633	16.9493		231.232	11.8114		118.796	14.911
86.32	16.951		32.4222	11.8139		40.9125	14.9377
214.434	16.9568		89	11.8193		53.9183	14.9508
50.4244	16.9694		19.6177	11.8231		44.1272	14.9718
151.17	16.9767		36.2851	11.8247		30.047	14.9779
57.7056	16.9841		182.051	11.8269		42.3408	14.9829
34.7925	16.9972		30.24	11.8351		121.031	14.99
89.4174	17.0077		110.025	11.8352		109.075	14.998
62.7571	17.0324		174.323	11.8383		92.9617	15
203.235	17.0341		162.819	11.8445		34.3569	15.0058
69.2238	17.0478		109.118	11.848		42.7039	15.0124
86.9374	17.069		101.579	11.8502		148.185	15.0244
120.399	17.0833		153.773	11.8516		66.7579	15.0323
140.581	17.0859		77.0266	11.8521		52.8368	15.0618
43.0438	17.0876		56.2843	11.8537		61.527	15.0623
109.515	17.0902		42.5994	11.8559		56.9431	15.0636
62.9709	17.1074		48.7866	11.8661		41.4847	15.0655
215.271	17.1192		68.0959	11.8873		83.3929	15.0657
148.585	17.1321		44.7658	11.8905		134.542	15.0732
104.604	17.1459		197.175	11.8918		161.58	15.0909
164.804	17.1508		29.2714	11.8935		72.5419	15.1091
101.071	17.1551		47.1748	11.8969		51.7256	15.1107
137.173	17.156		132.118	11.8997		117.036	15.1111
141.53	17.1572		183.27	11.9023		101.234	15.1165
136.931	17.1637		67.339	11.9042		146.22	15.1347
94.406	17.1692		107.191	11.9064		206.062	15.1408
130.474	17.2056		52.7388	11.9091		120.531	15.1418
80.9856	17.2212		147.598	11.9176		99.6465	15.1447
20.9729	17.2289		52.7555	11.9181		53.3848	15.1687
186.879	17.2471		103.459	11.9231		191.983	15.1774
79.9692	17.2822		68.8722	11.9252		42.7849	15.1827
82.9038	17.2833		112.477	11.9263		108.182	15.1859
170.811	17.2863		148.034	11.9303		99.6806	15.1974
92.9202	17.2943		145.009	11.9305		28.696	15.1975
52.9637	17.3061		144.294	11.933		97.893	15.2005
71.8672	17.3089		74.6118	11.9384		37.2125	15.2215
140.718	17.3184		128.522	11.9388		35.2515	15.2327
157.506	17.3359		102.582	11.9465		66.6157	15.2332
97.4678	17.3483		62.9904	11.9486		36.7752	15.2363
233.039	17.3646		150.503	11.9591		139.145	15.2393
79.4064	17.3918		91.1292	11.9615		54.8851	15.2413
154.561	17.393		139.204	11.9622		96.8069	15.2447
84.4927	17.4022		139.981	11.969		87.847	15.2572
165.123	17.4119		117.701	11.9693		82.3118	15.2583
31.6084	17.4132		165.971	11.9819		65.1293	15.2642
49.2149	17.4392		45.6915	11.9836		41.8539	15.2717
108.799	17.445		76.7834	11.9842		110.925	15.2758
74.2964	17.4767		29.9828	11.9864		74.3804	15.282
134.322	17.5093		40.9039	11.9882		70.7657	15.2955
91.1892	17.5342		81.8368	11.9896		81.0861	15.2963
160.889	17.5381		43.1199	11.9914		167.758	15.3041
58.5174	17.5808		31.6805	11.9928		139.954	15.3076
33.9048	17.5931		56.7839	11.9948		114.028	15.3112
55.9414	17.5952		28.4931	12.0069		124.117	15.3267
103.737	17.6017		159.464	12.0083		71.9905	15.3551
71.5315	17.6125		47.7306	12.0144		113.119	15.3564
90.3111	17.6157		72.9872	12.0167		103.763	15.3571
56.8779	17.6193		59.2533	12.0222		192.635	15.3611
103.67	17.6338		109.751	12.0224		52.3453	15.3698
69.337	17.645		97.3575	12.0248		36.5743	15.375
155.232	17.6509		184.805	12.0436		106.475	15.3907
18.1702	17.6656		79.6769	12.0476		26.3464	15.392
36.3622	17.675		62.9916	12.056		72.8883	15.4074
66.2301	17.6832		96.4209	12.0714		17.5964	15.4099
24.6289	17.702		85.7935	12.0767		75.2559	15.4163
125.475	17.7197		71.9556	12.0843		38.5552	15.4216
120.928	17.7362		67.3861	12.0937		35.184	15.4222
75.7217	17.7469		28.3225	12.095		77.8586	15.4223
132.991	17.7585		78.6988	12.0961		151.986	15.4326
165.577	17.7704		32.9384	12.1011		32.7326	15.4359
66.8522	17.7715		13.713	12.1122		100.173	15.4513
79.0038	17.8055		60.6174	12.1143		197.35	15.458
111.065	17.8137		46.2738	12.1175		49.664	15.4646
157.195	17.8177		127.574	12.1184		96.7099	15.4679
47.2956	17.8211		126.571	12.1184		73.5859	15.4695
79.5625	17.8213		155.544	12.1239		92.5928	15.4941
87.0548	17.8372		12.3061	12.1269		102.958	15.4973
38.25	17.8385		71.1601	12.1283		62.7926	15.5009
140.626	17.8472		40.8616	12.1337		91.79	15.5025
69.4	17.8721		79.9398	12.1338		35.4444	15.5097
154.951	17.8743		88.9912	12.1339		109.699	15.517
144.683	17.8862		83.6476	12.134		116.878	15.5226
21.1192	17.8938		66.7065	12.1365		145.512	15.5268
22.4527	17.9286		98.3821	12.1421		71.9597	15.5308
88.71	17.9467		96.8448	12.1525		80.9103	15.5468
48.9053	17.9568		55.7957	12.1538		37.7912	15.5484
53.1889	17.9599		51.7591	12.1545		116.374	15.5552
74.2786	17.9607		42.6954	12.1558		30.8191	15.5622
181.635	17.9932		196.28	12.1575		20.7799	15.5652
133.367	17.996		59.4014	12.161		34.7797	15.5714
113.5	18.0093		39.4752	12.1618		69.9381	15.5785
80.7929	18.014		37.1387	12.1697		53.6929	15.5866
149.181	18.0239		17.3844	12.17		54.7196	15.5921
73.4913	18.0317		49.4111	12.1724		150.971	15.6045
85.362	18.0412		52.8318	12.1796		102.413	15.6058
67.4439	18.0422		43.3864	12.1801		31.7893	15.6072
76.1689	18.0433		44.6875	12.1812		157.535	15.61
51.8243	18.0602		30.7564	12.1829		156.17	15.6143
179.505	18.0602		166.058	12.1854		55.3422	15.6221
89.1111	18.0644		131.91	12.1905		96.3438	15.6545
114.673	18.0687		83.2789	12.1969		21.6442	15.6568
53.3944	18.0743		36.6395	12.1995		85.4507	15.665
119.449	18.0854		103.013	12.2131		92.3502	15.6676
82.7642	18.0989		166.887	12.2137		38.1761	15.6766
109.482	18.1003		52.2853	12.2141		208.772	15.6838
84.0821	18.1091		160.759	12.2188		159.164	15.6941
56.1528	18.1114		102.044	12.2212		140.215	15.7024
93.8831	18.1234		19.625	12.2222		102.705	15.7095
31.3782	18.1474		13.9116	12.2294		60.319	15.7281
44.9602	18.1494		21.0865	12.2295		53.6433	15.7381
67.7059	18.1556		143.428	12.2308		32.5902	15.7478
69.7873	18.1571		24.6271	12.2314		146.56	15.7658
138.802	18.2017		129.324	12.2359		28.6427	15.7709
149.865	18.2042		140.755	12.2368		41.7753	15.7733
147.512	18.2081		84.1625	12.2377		114.283	15.7746
161.487	18.2134		80.3437	12.2416		44.0101	15.7832
35.3284	18.2163		88.4789	12.2443		122.502	15.7895
79.7619	18.2204		75.172	12.2483		125.954	15.7974
97.355	18.2218		150.771	12.2569		148.94	15.7984
89.2067	18.2247		16.3486	12.2584		165.964	15.8142
111.493	18.2273		95.8048	12.2667		45.4618	15.8241
182.054	18.2297		95.9573	12.2715		97.1426	15.8293
44.1855	18.2346		61.0183	12.2796		113.599	15.8325
88.8211	18.2472		53.2869	12.2861		26.8934	15.8367
117.336	18.25		136.663	12.2901		44.0262	15.8454
77.1445	18.2653		182.997	12.2936		51.6302	15.8513
115.554	18.2871		50.0035	12.2941		101.232	15.853
60.0526	18.3106		129.242	12.2952		127.07	15.8549
167.385	18.3282		107.224	12.2971		191.877	15.8616
141.307	18.3597		166.601	12.3014		69.9007	15.8667
151.864	18.3778		62.4782	12.3084		121.796	15.8859
123.393	18.3819		113.548	12.3093		25.3349	15.8873
73.9265	18.3944		76.0378	12.3121		112.034	15.8982
94.6351	18.3951		94.7209	12.3125		67.9388	15.9088
43.8563	18.3959		35.4203	12.3133		148.445	15.9129
130.162	18.4052		77.1871	12.3134		157.526	15.9132
66.6455	18.4153		39.2119	12.3173		156.979	15.915
94.741	18.4201		37.5385	12.3182		128.575	15.9204
113.449	18.4311		55.3003	12.3232		91.9639	15.9212
132.755	18.438		47.2058	12.3301		43.5594	15.9224
18.9273	18.4459		28.8447	12.3313		143.636	15.9291
216.97	18.4474		29.2553	12.3359		23.7852	15.9471
88.3932	18.4484		42.6032	12.3477		113.741	15.9673
35.6399	18.459		126.172	12.3521		84.377	15.9679
50.0716	18.4634		121.92	12.3578		34.156	15.968
134.682	18.4701		24.1146	12.3633		59.7544	15.9685
174.747	18.4807		45.8539	12.3657		128.519	15.9697
117.417	18.494		23.6934	12.3725		95.1076	15.9783
124.518	18.5041		24.5988	12.3764		102.995	15.9813
162.817	18.5071		24.0133	12.3803		95.8616	16
100.656	18.5206		61.6136	12.3873		23.9823	16.0088
147.123	18.5455		119.034	12.3944		18.8767	16.0229
100.232	18.5556		51.4124	12.401		80.5567	16.0292
51.9778	18.5652		71.737	12.4061		55.4375	16.0418
135.824	18.5735		99.1388	12.4086		65.279	16.0504
85.004	18.6123		42.6371	12.4148		80.2723	16.0686
58.542	18.6185		50.3415	12.4161		77.2677	16.0701
92.3972	18.6555		61.6391	12.4191		127.137	16.084
152.25	18.6607		125.036	12.4215		109.894	16.0892
126.074	18.6615		118.176	12.4286		25.4605	16.0906
36.9784	18.6617		173.048	12.4286		55.7333	16.093
39.7561	18.6846		28.8526	12.4308		50.4051	16.0957
61.3858	18.7133		79.3378	12.4318		65.8435	16.0997
161.423	18.7279		136.109	12.4332		127.94	16.107
91.8796	18.7324		90.4706	12.4348		20.5223	16.1195
36.2764	18.7331		75.9366	12.435		74.4714	16.1202
62.8934	18.7394		49.7833	12.4407		109.252	16.1264
75.1057	18.7738		97.4068	12.4412		128.396	16.1268
66.6174	18.7869		75.2807	12.4425		119.91	16.1368
81.8547	18.8091		85.2439	12.4457		44.3754	16.1381
30.0025	18.8216		106.178	12.4463		68.5202	16.1542
91.3539	18.8219		134.784	12.4476		129.112	16.1561
145.483	18.8275		52.9038	12.4514		123.015	16.163
108.591	18.8347		159.668	12.4534		28.6388	16.1683
60.9018	18.8469		98.8258	12.456		48.3986	16.1776
56.4848	18.8515		26.654	12.4563		105.033	16.1822
70.7968	18.8539		102.759	12.4625		107.355	16.1848
127.597	18.8555		87.9041	12.4664		22.5865	16.1968
153.154	18.8604		97.6983	12.4758		38.4207	16.1976
126.485	18.8694		21.7541	12.4758		109.495	16.2079
173.368	18.8889		123.332	12.4766		204.911	16.2081
72.8854	18.8893		119.021	12.481		39.5748	16.2161
77.3095	18.8896		42.2371	12.4846		106.669	16.219
54.6292	18.8993		62.7275	12.4924		25.6685	16.2243
83.6134	18.9149		86.8016	12.4946		50.4156	16.2365
102.087	18.9199		136.316	12.5		73.7164	16.2438
52.5275	18.933		93.0355	12.5014		73.0419	16.2509
101.542	18.9385		46.3682	12.5017		166.795	16.2517
93.4328	18.9437		73.2	12.5038		51.454	16.2587
23.8508	18.9837		47.7049	12.5049		43.1865	16.2683
104.945	18.9902		68.3456	12.5063		71.8817	16.2705
62.3159	18.9947		92.4731	12.5088		31.3918	16.2756
53.9324	19.0175		91.654	12.5154		175.007	16.276
209.423	19.0187		121.268	12.5171		15.4645	16.2767
83.749	19.0221		35.6097	12.5198		181.195	16.2812
172.013	19.0248		163.558	12.522		41.3309	16.2857
61.7489	19.0313		85.3393	12.529		83.5494	16.2912
112.436	19.0324		87.0694	12.5294		69.4486	16.2923
65.1333	19.0562		99.3275	12.5304		53.4855	16.2979
87.5353	19.0736		68.4897	12.5306		116.377	16.298
112.107	19.1082		83.4378	12.5311		92.1574	16.3052
66.2672	19.113		143.444	12.5368		50.225	16.3111
76.5531	19.1285		50.8815	12.5386		96.9198	16.3182
156.282	19.157		39.9114	12.5393		33.8768	16.3222
45.9855	19.2096		209.685	12.549		59.1753	16.3352
70.1845	19.2255		40.6715	12.5534		23.4489	16.3369
76.8065	19.2343		85.4365	12.562		31.6776	16.3406
54.9066	19.2457		144.855	12.5625		62.3421	16.3415
158.853	19.248		159.242	12.5649		56.2227	16.3524
64.1806	19.254		184.932	12.5704		87.3767	16.3615
113.008	19.2669		107.962	12.5732		86.9296	16.3684
54.2305	19.2753		111.122	12.5833		48.0931	16.3731
95.6517	19.2812		99.7724	12.5845		77.3333	16.3789
207.739	19.2882		66.0796	12.5854		79.7842	16.3914
136.675	19.3066		30.8036	12.5892		105.573	16.3923
47.3876	19.3116		33.7297	12.5918		107.791	16.3937
59.4749	19.3297		59.5031	12.5951		173.01	16.3949
183.483	19.3472		31.6337	12.5989		95.7224	16.3956
136.261	19.3519		36.5328	12.6008		48.3101	16.4192
116.158	19.391		118.439	12.6018		43.9549	16.425
111.207	19.398		58.0192	12.6025		78.9781	16.4277
94.1148	19.4076		185.628	12.6043		64.9204	16.4341
81.2	19.4159		157.927	12.6115		27.4741	16.4409
93.2799	19.4227		45.7127	12.6152		84.4657	16.4417
86.8468	19.4377		26.1433	12.619		76.4181	16.4529
47.3703	19.4425		43.4145	12.6246		24.6091	16.4533
69.8291	19.4512		160.204	12.6296		164.412	16.4561
191.729	19.4514		29.7494	12.6314		168.877	16.4565
81.9759	19.4519		114.9	12.632		116.338	16.4573
68.2736	19.4645		112.661	12.6352		32.5801	16.4577
78.5153	19.4653		83.9778	12.6402		86.3251	16.4601
112.208	19.4856		116.112	12.6409		43.3855	16.468
93.4103	19.4867		182.467	12.6416		74.9493	16.4785
109.99	19.4907		146.771	12.6435		95.2977	16.4864
93.4794	19.4917		168.476	12.6481		47.8032	16.4948
113.058	19.5108		155.417	12.6508		133.527	16.5023
75.194	19.5339		50.0253	12.6575		75.9789	16.5077
149.093	19.5378		213.523	12.6585		31.925	16.5343
99.1121	19.5493		57.7401	12.6595		56.066	16.5363
115.95	19.5601		41.9369	12.6629		38.8056	16.5363
135.726	19.632		114.483	12.6638		61.2082	16.5374
196.284	19.6444		52.7652	12.6676		49.4835	16.5552
49.0196	19.6585		48.1935	12.6702		18.4857	16.5552
153.412	19.6609		53.3683	12.6778		26.8196	16.5574
68.7167	19.6696		35.1832	12.6811		27.6446	16.5806
60.9606	19.6779		128.227	12.6858		56.3495	16.5806
93.4348	19.6787		139.505	12.6905		123.495	16.5808
52.9101	19.6851		42.0058	12.6948		46.3609	16.5918
69.4574	19.6928		21.7658	12.6975		98.8158	16.6029
91.6084	19.7053		47.2374	12.6982		85.6124	16.6333
46.5344	19.7237		122.354	12.7		155.128	16.6339
32.6112	19.7304		63.165	12.703		69.2224	16.6464
147.334	19.7362		92.5046	12.708		119.361	16.6515
278.547	19.7482		47.7356	12.71		66.8039	16.6524
27.6791	19.7537		81.318	12.7154		183.769	16.6549
113.124	19.7644		101.72	12.7155		101.301	16.6626
96.3608	19.7644		29.6216	12.7173		199.247	16.6639
167.483	19.7792		83.6124	12.7191		55.8026	16.6661
77.6788	19.7809		42.1085	12.7258		57.7187	16.6677
79.9214	19.8119		95.4515	12.7279		44.3177	16.6737
170.231	19.8238		27.2115	12.7297		84.5578	16.6759
95.8618	19.8261		118.375	12.7368		56.354	16.6831
86.6458	19.8306		108.985	12.7376		107.862	16.6851
91.9188	19.8443		53.8525	12.7407		89.7773	16.6858
156.517	19.8484		45.0849	12.75		67.8625	16.6952
94.4413	19.8768		133.49	12.754		41.9	16.7018
36.5075	19.897		143.369	12.7572		42.5654	16.7034
89.1161	19.8989		47.7459	12.7608		90.166	16.7105
136.354	19.9183		178.901	12.7619		127.729	16.7458
89.163	19.9242		155.421	12.765		138.732	16.748
134.33	19.9475		22.8214	12.7668		100.094	16.7623
48.0674	19.9624		141.677	12.7704		78.7163	16.7636
109.248	19.9632		67.5028	12.7731		92.023	16.7681
75.89	19.9672		27.1316	12.7757		109.669	16.7816
163.998	19.9767		58.3207	12.7784		21.2994	16.7918
70.4533	19.9771		69.0656	12.7792		51.0054	16.7947
35.3601	19.9781		169.229	12.7801		111.18	16.7956
81.8382	19.9938		95.9924	12.7855		39.6147	16.8043
64.6233	19.9985		110.874	12.7895		99.0892	16.8047
53.1587	20.0144		63.6629	12.7896		108.812	16.8075
56.305	20.0265		42.8136	12.8097		61.2483	16.8075
98.5369	20.0285		178.619	12.8126		37.385	16.8254
75.93	20.0442		36.9248	12.818		34.9657	16.8352
84.439	20.0454		61.0082	12.8209		34.3484	16.8392
48.5504	20.0559		99.1556	12.8235		82.0046	16.8399
38.6803	20.0638		179.923	12.8235		109.01	16.851
110.87	20.0737		58.4973	12.8291		184.468	16.8596
81.4447	20.0836		146.522	12.8333		147.911	16.8597
115.854	20.0874		63.4915	12.8353		30.8456	16.8598
36.2243	20.0877		76.5112	12.8356		88.1379	16.8677
44.6145	20.118		139.158	12.837		99.0113	16.8767
85.0496	20.1257		108.9	12.8417		38.9356	16.882
69.8861	20.1427		111.631	12.8443		162.256	16.8896
71.0397	20.1525		80.2793	12.8492		62.9045	16.8998
127.886	20.1559		136.111	12.8502		97.5057	16.901
129.576	20.1818		173.735	12.8521		65.089	16.9094
138.752	20.1826		25.7951	12.8589		112.894	16.9221
121.863	20.1845		62.8938	12.8591		30.8985	16.9244
175.17	20.1849		59.4863	12.8643		46.1265	16.9284
109.985	20.2249		126.98	12.8665		139.966	16.9341
87.6207	20.2253		22.1315	12.869		34.1788	16.9382
66.3715	20.2599		90.3101	12.875		60.3623	16.9487
63.6973	20.2671		112.418	12.878		124.954	16.9519
81.6851	20.279		39.9604	12.8786		167.512	16.9561
41.4781	20.2843		94.4952	12.8865		150.079	16.9581
124.517	20.287		37.7895	12.8937		150.151	16.9603
66.5925	20.2879		127.023	12.8957		211.644	16.9653
132.165	20.3042		152.514	12.8989		63.7765	16.9712
170.693	20.3139		38.693	12.9003		49.3401	16.9766
124.666	20.3306		32.8206	12.901		142.917	16.9783
86.3486	20.3352		157.425	12.9202		26.0156	16.9901
133.325	20.3693		48.1166	12.9268		120.559	16.9931
104.453	20.3879		67.1745	12.9365		165.843	16.9936
115.29	20.3903		43.1155	12.9372		24.6019	17
134.566	20.3931		123.753	12.9424		144.494	17.0034
228.039	20.4064		56.0915	12.9426		98.3533	17.0056
42.0992	20.4204		20.3304	12.9474		48.58	17.0178
47.6244	20.4377		151.105	12.9476		131.348	17.0194
80.4203	20.4401		160.997	12.9536		176.577	17.0227
129.887	20.4487		66.0608	12.9537		99.0718	17.0471
47.345	20.454		79.6272	12.9574		135.351	17.0482
165.369	20.4564		24.6465	12.9583		79.7636	17.0486
129.908	20.4832		44.3032	12.9656		74.9215	17.0568
90.5297	20.4834		111.572	12.9695		37.4573	17.0713
97.6327	20.4868		80.5341	12.9751		80.3448	17.0893
41.4463	20.5025		119.364	12.9778		40.5206	17.1055
143.009	20.5056		138.118	12.9794		55.2814	17.1103
30.6181	20.5119		146.182	12.98		116.968	17.115
84.8201	20.5315		116.789	12.9831		84.0333	17.1228
58.3343	20.5398		63.6105	12.9893		58.1031	17.1615
121.551	20.5813		85.9377	13		27.1974	17.1637
130.3	20.5815		88.8244	13		117.601	17.1696
127.813	20.584		28.6345	13		62.6711	17.1736
33.066	20.5873		117.636	13		73.5731	17.1756
63.1823	20.5901		101.723	13.0071		24.4644	17.1786
103.82	20.5902		63.8225	13.0102		174.825	17.1867
22.7313	20.6069		38.2207	13.0103		50.45	17.1881
36.1489	20.6149		25.3697	13.0117		58.6469	17.1903
65.6097	20.6301		50.297	13.0152		28.7545	17.1905
56.3252	20.6467		73.9893	13.0212		45.2071	17.1905
39.7542	20.6529		46.5055	13.0248		127.101	17.1951
234.013	20.6608		34.8414	13.0286		76.6533	17.208
73.616	20.6701		122.132	13.0288		54.3323	17.2129
93.0724	20.6755		67.3421	13.0289		56.2387	17.2275
102.617	20.6813		89.971	13.0376		19.295	17.2334
74.1661	20.7252		111.032	13.0426		142.38	17.2405
167.103	20.7479		146.704	13.0506		32.6515	17.2459
86.316	20.7619		39.294	13.0543		101.483	17.2537
76.1195	20.7911		47.0131	13.0549		38.0693	17.2607
143.277	20.8007		39.0658	13.0566		116.326	17.2648
57.5979	20.8037		137.305	13.0681		145.349	17.2663
182.886	20.8273		36.1162	13.0688		29.1757	17.2721
75.5307	20.83		154.213	13.0693		37.3089	17.2773
162.491	20.8314		46.9615	13.0693		80.4667	17.2885
112.432	20.8491		160.298	13.0761		27.4323	17.3017
86.526	20.8602		126.181	13.0767		137.696	17.3178
91.4299	20.8723		70.9286	13.0783		179.768	17.3264
138.564	20.9318		68.1514	13.08		89.9725	17.3523
145.466	20.9356		21.3652	13.084		96.7351	17.3567
57.1986	20.9366		87.7957	13.0884		105.83	17.3581
118.453	20.9498		120.959	13.0888		113.367	17.3604
195.786	20.9506		105.3	13.0892		78.1908	17.3686
133.882	20.9555		47.5133	13.0979		125.78	17.3885
148.906	20.9657		29.5793	13.1058		42.9056	17.3944
58.6475	20.9717		131.822	13.1067		36.0157	17.3958
60.3905	20.9755		158.241	13.1152		97.3003	17.4048
69.5112	20.9828		87.5796	13.1191		168.571	17.4053
45.8039	21.0069		38.8025	13.127		143.027	17.4095
37.4796	21.0225		80.1698	13.1337		140.825	17.4097
111.212	21.0261		36.573	13.1346		115.929	17.4128
57.5495	21.031		56.5872	13.1394		76.0823	17.4225
109.307	21.034		102.492	13.1425		80.4756	17.4244
73.4378	21.0411		117.205	13.1441		80.2446	17.4258
68.4502	21.0574		42.6626	13.148		53.5551	17.4298
97.3131	21.0761		33.2533	13.1481		50.994	17.4452
54.1814	21.087		88.4694	13.1508		74.4164	17.4471
180.491	21.1042		149.422	13.1529		26.3781	17.4547
56.1938	21.1059		29.8903	13.1574		59.7181	17.4559
129.12	21.1074		46.3333	13.1583		26.8457	17.4565
144.719	21.1232		42.0772	13.1587		50.8861	17.479
126.306	21.1243		46.8272	13.1613		72.5343	17.4814
118.742	21.1445		127.25	13.1637		68.0927	17.484
165.251	21.1459		113.899	13.1767		38.762	17.4912
40.6925	21.1489		114.992	13.179		138.729	17.5
30.1085	21.1495		51.9309	13.1821		67.213	17.5008
60.6047	21.1504		75.1805	13.1864		46.3056	17.5056
42.4523	21.2027		119.772	13.1873		59.7676	17.5159
77.9921	21.2029		71.1241	13.1881		69.4408	17.5187
59.6106	21.2035		63.5095	13.1976		54.7681	17.5212
96.3537	21.2039		38.4817	13.1982		51.0526	17.5223
64.2963	21.2215		36.378	13.2042		111.438	17.5267
153.092	21.2259		152.497	13.207		21.32	17.5285
157.252	21.2382		104.618	13.2128		37.7885	17.5629
80.9016	21.2406		51.4005	13.2234		193.066	17.5804
54.9345	21.2425		111.71	13.2303		71.242	17.5812
46.8	21.26		36.9064	13.2303		30.3713	17.5889
31.0029	21.2669		23.0128	13.2348		138.496	17.6161
38.2096	21.2717		39.5732	13.2485		140.088	17.6282
81.9957	21.2794		108.332	13.2626		27.6748	17.6403
153.732	21.2935		105.876	13.2672		41.2989	17.6513
32.3043	21.296		20.9283	13.2694		93.7706	17.6566
87.629	21.3023		48.1364	13.2699		100.078	17.6567
30.1043	21.3193		46.5203	13.2727		114.378	17.6594
154.733	21.3238		57.8718	13.2759		35.1406	17.6646
35.9765	21.3327		192.712	13.2772		89.7714	17.6781
52.2523	21.3411		67.5	13.2775		82.6784	17.6804
83.8544	21.3424		31.145	13.2784		182.832	17.694
60.2876	21.3443		21.1508	13.2791		51.4839	17.7011
70.6944	21.3473		67.4048	13.2793		36.7081	17.7093
105.805	21.3498		83.1202	13.2802		40.9075	17.7333
73.9845	21.3657		63.5655	13.2878		132.945	17.7414
191.984	21.3801		57.6872	13.2944		61.2493	17.7444
34.0362	21.4085		36.7623	13.3022		39.4618	17.7462
107.555	21.4236		158.622	13.3042		30.4307	17.7521
56.5941	21.4251		42.2147	13.3073		118.349	17.7553
124.372	21.4309		31.4517	13.3156		64.2107	17.7739
222.875	21.4327		92.822	13.3186		127.844	17.7813
115.487	21.4332		111.593	13.3236		79.7824	17.7859
52.9332	21.4341		75.4033	13.3241		243.008	17.7866
93.1682	21.4423		87.9505	13.3271		46.8337	17.7883
96.2853	21.4436		185.508	13.3326		66.8575	17.7993
97.9326	21.4556		55.9381	13.3363		83.7418	17.816
29.9122	21.4783		98.2454	13.3433		113.013	17.8228
120.771	21.4958		28.5419	13.3457		96.7793	17.8333
72.0844	21.4966		42.1976	13.349		20.3507	17.8616
38.1424	21.5023		119.262	13.3509		125.888	17.8848
118.744	21.5264		122.957	13.3678		50.7801	17.8929
77.4426	21.5521		109.602	13.3716		60.7151	17.9027
53.4939	21.5546		69.5502	13.375		57.6	17.9075
33.5944	21.5625		47.5556	13.375		172.903	17.9184
142.253	21.6026		133.539	13.3754		135.566	17.9236
25.699	21.6057		109.998	13.3761		132.986	17.9257
18.8679	21.6167		156.145	13.3771		56.3014	17.9269
114.157	21.6188		64.0316	13.3876		72.7629	17.9337
122.244	21.6239		29.082	13.3891		81.4315	17.9374
90.6498	21.6276		105.081	13.3915		68.1396	17.9461
117.365	21.6288		75.6272	13.3931		39.5152	17.9518
187.023	21.636		95.1799	13.3994		155.602	17.9612
74.3775	21.6429		19.2545	13.406		144.676	17.9698
77.7128	21.6556		59.532	13.4065		48.1937	17.9903
95.9136	21.656		115.676	13.4095		87.37	18
196.576	21.6596		22.7494	13.4097		115.789	18.0062
80.9343	21.6604		38.4548	13.4209		114.527	18.008
75.1818	21.6614		93.3889	13.4232		110.331	18.0144
22.6854	21.6644		160.817	13.4261		164.275	18.0168
79.5217	21.7064		30.3986	13.429		127.15	18.0174
70.4932	21.7082		41	13.4378		50.9471	18.0305
92.1451	21.7106		131.276	13.4425		31.126	18.0314
137.719	21.721		8.05185	13.4437		81.8169	18.0424
105.191	21.7256		84.4428	13.4534		105.065	18.0443
43.4842	21.732		42.9643	13.4613		75.23	18.058
82.4513	21.7383		88.5988	13.4613		48.3918	18.0694
64.6009	21.7428		52.5526	13.4688		21.5552	18.0727
22.2548	21.7596		176.153	13.4701		69.3458	18.0749
107.225	21.7766		141.257	13.4766		182.121	18.0927
143.049	21.8003		128.689	13.4901		218.611	18.0981
60.956	21.8058		78.8299	13.4913		45.7133	18.1002
17.0202	21.8136		85.1952	13.4935		232.824	18.1051
243.249	21.814		38.2749	13.5018		123.4	18.115
55.7402	21.8151		141.437	13.525		22.7816	18.1222
64.8944	21.825		23.6844	13.5251		175.35	18.1367
152.465	21.8341		68.7621	13.5284		77.8506	18.1369
133.958	21.8475		36.3661	13.5428		85.6041	18.1376
83.3458	21.8497		134.93	13.5437		115.816	18.1508
37.3144	21.8525		22.6914	13.5493		162.477	18.1565
111.665	21.8574		149.541	13.5563		77.2216	18.1699
106.089	21.8903		74.0034	13.5631		102.768	18.1747
123.932	21.932		80.345	13.586		33.5401	18.1784
189.525	21.9322		85.5857	13.5953		144.16	18.1971
113.11	21.9368		157.208	13.6038		67.4749	18.2083
111.134	21.9391		83.5402	13.604		71.0853	18.2108
55.2442	21.9455		65.254	13.6078		91.8161	18.2114
152.499	21.9511		13.7362	13.6115		118.25	18.2119
141.642	21.956		44.3152	13.6212		110.347	18.24
72.6423	21.9604		152.49	13.6254		141.922	18.2405
27.8376	21.9636		39.8482	13.627		149.713	18.25
103.262	21.9847		28.3342	13.6279		152.932	18.2625
103.402	21.9894		93.764	13.6342		58.4635	18.2711
96.0847	21.993		53.9971	13.6387		54.5644	18.2757
171.39	22.0173		52.9238	13.6392		222.713	18.2862
70.0817	22.0188		150.115	13.6407		148.167	18.2917
105.28	22.0251		60.2099	13.6408		131.988	18.2978
34.4613	22.0256		87.9105	13.6548		59.8072	18.3018
106.808	22.0332		117.293	13.6588		210.802	18.3298
176.9	22.055		148.846	13.662		97.5403	18.3377
40.3292	22.0563		136.104	13.6621		101.936	18.3381
174.141	22.0728		131.52	13.6652		103.38	18.3426
58.1183	22.0895		84.3481	13.6701		45.4057	18.3439
78.489	22.1233		118.404	13.6731		69.9786	18.3505
66.0108	22.1359		78.3017	13.6768		79.1466	18.352
117.255	22.1397		13.162	13.6783		20.7697	18.3594
105.553	22.1437		104.604	13.6846		128.238	18.3633
22.8548	22.149		59.3103	13.6848		42.7753	18.3689
95.4177	22.1538		30.426	13.6851		24.328	18.3815
91.6581	22.1579		39.9544	13.6958		64.3562	18.3821
122.387	22.163		121.051	13.7011		21.577	18.3897
124.129	22.1659		89.4591	13.7071		45.9542	18.3912
106.513	22.1901		152.79	13.7078		29.6784	18.4007
114.837	22.1906		35.1178	13.7174		109.173	18.405
82.0297	22.2015		138.516	13.722		127.281	18.4142
118.931	22.2258		35.2788	13.7244		139.937	18.4148
14.9539	22.2383		142.091	13.7283		85.4066	18.4152
33.7336	22.2608		58.8251	13.7287		91.9609	18.4208
130.172	22.2773		50.1796	13.7297		39.8689	18.4266
63.674	22.3068		26.3134	13.7406		29.8956	18.431
111.487	22.3117		86.3564	13.7488		29.5665	18.4362
125.403	22.3294		16.9481	13.7545		148.002	18.4364
116.086	22.3419		93.993	13.7556		41.0696	18.4381
72.1492	22.3515		80.2662	13.7585		44.2672	18.4421
85.8254	22.3662		126.906	13.7716		24.3681	18.4477
78.1005	22.3747		34.7599	13.7722		30.5157	18.4516
63.6851	22.3753		143.882	13.7725		40.0705	18.4566
132.549	22.3891		21.108	13.7812		39.1651	18.4566
96.57	22.3953		90.303	13.7821		100.708	18.4642
41.3048	22.3987		103.726	13.7861		167.299	18.4675
85.8593	22.4037		44.7874	13.7907		75.0556	18.474
39.4941	22.4074		71.4312	13.7908		55.5213	18.4846
197.44	22.4108		193.912	13.7931		121.823	18.4926
107.602	22.4301		77.52	13.8093		93.9689	18.4945
48.0811	22.4457		50.4646	13.8119		56.0415	18.4987
73.3696	22.4626		123.876	13.8125		25.8065	18.5025
88.0148	22.4637		77.4612	13.8129		53.7013	18.5172
74.4462	22.4768		83.6098	13.8132		175.493	18.5175
159.609	22.4843		57.4926	13.8136		118.327	18.531
81.4183	22.5056		80.0795	13.8191		36.1445	18.535
178.876	22.5186		57.8157	13.8198		82.3506	18.5376
26.9969	22.5296		86.1202	13.8381		20.5	18.5404
81.7737	22.532		110.264	13.8555		24.2543	18.5419
34.4988	22.5378		47.9377	13.8568		69.1747	18.5423
211.505	22.5434		148.196	13.8587		156.211	18.5474
104.652	22.5696		61.5769	13.8635		293.959	18.5486
75.0293	22.5811		122.43	13.8655		54.0569	18.5637
54.7789	22.5824		52.4412	13.8682		74.3125	18.5664
119.593	22.5898		156.399	13.8729		173.021	18.5714
129.85	22.6054		35.7313	13.8773		113.746	18.5728
120.864	22.6181		146.957	13.8786		52.4321	18.577
191.574	22.6292		97.1739	13.8839		18.1887	18.5887
57.6518	22.6416		32.5147	13.887		26.3088	18.59
75.9439	22.6476		46.2543	13.887		162.925	18.5952
86.6799	22.6565		107.863	13.8985		113.044	18.6058
131.504	22.6639		50.4114	13.9157		106.413	18.6075
127.279	22.6646		215.782	13.9226		27.3531	18.614
95.1535	22.6799		64.2064	13.9293		69.3962	18.6297
121.457	22.7094		24.9242	13.93		34.7203	18.6299
115.944	22.7095		34.1636	13.9354		25.328	18.6339
67.1625	22.7179		93.2443	13.9369		51.8435	18.6415
78.1836	22.7183		40.7625	13.941		56.8223	18.6465
98.0238	22.7305		34.1584	13.9457		103.171	18.6489
43.6598	22.7429		61.4776	13.9471		66.107	18.6493
122.106	22.743		30.3606	13.9471		54.9188	18.6504
35.8267	22.7936		36.2152	13.9527		62.7583	18.6658
175.041	22.7958		146.971	13.9534		33.4589	18.6724
58.6058	22.7964		60.6743	13.9535		80.2915	18.6859
90.4521	22.8063		151.005	13.9575		25.625	18.687
107.009	22.8065		72.8392	13.9603		60.9474	18.6944
50.3277	22.8148		133.328	13.9667		77.4818	18.6989
107.92	22.8187		104	13.969		50.0732	18.7061
90.1097	22.8209		167.685	13.976		166.744	18.7084
86.7893	22.833		72.102	13.9772		55.7558	18.7103
62.5929	22.8373		46.0772	13.9808		55.3024	18.713
108.095	22.8405		120.771	13.9816		113.786	18.7259
148.84	22.8562		38.2678	13.982		26.1697	18.7269
120.216	22.8708		78.0403	13.9831		53.069	18.7321
145.554	22.8816		145.504	13.9832		64.9279	18.7516
209.403	22.8963		75.6575	13.9883		142.647	18.7645
115.952	22.901		49.6514	13.9888		108.589	18.7646
88.4515	22.9032		177.957	13.9946		35.6364	18.7707
123.756	22.9092		146.109	14		45.3547	18.7917
35.9718	22.9229		90.8256	14.0112		37.3094	18.7995
99.2615	22.9252		103.891	14.0112		82.5021	18.8064
101.646	22.9457		31.7563	14.0115		136	18.8074
168.496	22.968		90.0487	14.0162		61.4366	18.822
73.3304	22.9989		146.507	14.0177		98.1721	18.8393
97.8424	23.0213		122.966	14.0205		19.7972	18.8462
201.798	23.0252		35.3179	14.0228		167.019	18.8761
35.8708	23.0389		127.444	14.0302		55.0038	18.8805
62.6033	23.0615		168.586	14.0341		160.864	18.8815
52.3004	23.0665		38.94	14.0449		24.5087	18.8852
142.51	23.0716		63.2458	14.0465		56.1555	18.8875
132.825	23.0966		157.14	14.048		24.6868	18.8992
83.1429	23.1349		39.2612	14.0551		75.0673	18.91
128.497	23.1424		92.5451	14.0629		86.953	18.9115
61.2594	23.1466		42.5229	14.0663		64.8992	18.9188
119.498	23.1506		129.867	14.0667		41.5909	18.9214
83.2968	23.1557		56.5415	14.0691		194.865	18.9219
87.1798	23.1562		17.3141	14.0716		86.9568	18.9223
59.0116	23.1572		123.013	14.0754		29.5568	18.923
64.6828	23.1586		41.6551	14.089		16.1542	18.9356
59.6146	23.1708		56.734	14.0989		32.9182	18.9408
111.694	23.1771		62.2563	14.1057		166.037	18.9425
135.307	23.1789		66.0336	14.1076		72.3801	18.9602
60.5499	23.1807		164.66	14.1129		73.9708	18.9698
84.557	23.192		26.5881	14.1167		155.445	18.9948
158.763	23.2202		92.9359	14.1223		43.5959	19
129.811	23.2271		42.0266	14.1257		145.227	19
107.161	23.2271		111.905	14.1258		62.0113	19.0104
121.745	23.2675		83.6306	14.1291		66.2704	19.0116
148.978	23.2703		116.397	14.1343		37.5533	19.0135
197.819	23.2734		37.4113	14.1346		38.8433	19.0165
195.841	23.2892		57.496	14.1356		51.0033	19.0168
231.246	23.2895		98.3824	14.1373		20.2548	19.0244
54.973	23.2931		92.8013	14.1382		105.066	19.0284
117.773	23.3034		53.8018	14.1513		166.622	19.0377
121.352	23.3053		65.932	14.1674		74.387	19.0442
107.774	23.3102		33.1242	14.1739		36.3636	19.0487
46.0932	23.3192		34.9495	14.1749		204.395	19.0655
59.6313	23.3385		39.4619	14.1755		150.507	19.0693
186.235	23.3493		158.562	14.1796		31.7156	19.0703
189.834	23.3609		140.081	14.1847		43.8282	19.0741
138.34	23.3842		120.888	14.1877		25.0314	19.09
105.664	23.3953		176.522	14.1909		32.9922	19.0905
82.0229	23.3983		81.535	14.2137		161.152	19.0909
195.923	23.4573		29.7197	14.2158		46.8342	19.0975
122.34	23.4594		127.324	14.2193		72.0221	19.101
207.742	23.4731		179.107	14.2195		124.149	19.1064
114.032	23.5144		123.832	14.2196		81.394	19.1065
118.495	23.5254		90.5938	14.2246		21.6092	19.1104
55.6622	23.5256		66.8925	14.2286		55.8465	19.1136
178.795	23.5552		155.27	14.2323		25.0974	19.1148
125.829	23.5734		66.3927	14.2342		74.5158	19.1191
79.2028	23.5755		190.849	14.2396		30.6246	19.1243
99.8299	23.5908		205.336	14.2427		101.24	19.1277
115.235	23.5967		113.391	14.2433		48.1538	19.1314
143.722	23.598		91.7524	14.2443		44.0769	19.1322
98.2196	23.6324		25.0322	14.2451		109.137	19.1322
66.2595	23.6337		30.8324	14.256		113.64	19.1412
64.8827	23.642		110.674	14.2565		136.677	19.1464
107.721	23.664		36.006	14.2565		40.3466	19.159
70.5635	23.6644		134.596	14.2568		74.5805	19.1716
123.635	23.6876		108.526	14.2599		126.313	19.1999
101.676	23.6954		113.043	14.2608		56.426	19.2088
62.1935	23.6998		102.812	14.2802		31.893	19.2142
111.258	23.7176		105.939	14.2807		48.7108	19.2189
177.497	23.7266		40.7511	14.2842		17.8605	19.219
138.182	23.7369		114.02	14.2848		126.083	19.2221
112.282	23.7457		196.097	14.2852		190.472	19.2295
82.8128	23.761		36.9622	14.2903		117.012	19.2367
121.65	23.7723		138.668	14.3021		104.549	19.2392
101.722	23.7974		148.218	14.3101		56.827	19.2487
84.3326	23.8139		128.417	14.3219		74.4683	19.2513
171.249	23.8194		119.424	14.3227		87.4286	19.2513
69.0905	23.8345		87.1984	14.3287		129.864	19.2621
119.562	23.8403		118.451	14.3417		39.4813	19.2663
73.1122	23.8463		61.4271	14.3423		68.2076	19.2665
117.208	23.8479		78.1341	14.3442		44.3442	19.2706
167.678	23.8598		103.169	14.3463		106.431	19.2754
121.953	23.8791		93.012	14.3469		180.006	19.2803
87.4085	23.8801		127.22	14.3481		48.6604	19.2833
92.9893	23.8833		70.6393	14.3552		73.0157	19.2849
93.2591	23.8882		122.976	14.359		33.7768	19.2934
156.337	23.9056		116.31	14.372		22.9595	19.2975
101.157	23.9106		91.2552	14.3721		35.2244	19.2997
156.834	23.9124		65.6271	14.3746		56.3636	19.3027
80.4095	23.9201		135.437	14.3779		98.1286	19.3076
86.7767	23.9316		157.035	14.3884		175.217	19.3175
72.0047	23.9348		43.3141	14.3995		174.501	19.319
123.668	23.9455		177.875	14.4005		27.0401	19.3238
36.8344	23.946		54.4861	14.4047		57.4938	19.3259
76.385	23.955		53.7789	14.4151		122.312	19.3529
41.7015	23.9568		39.0653	14.4299		65.4431	19.3561
34.2642	23.9907		40.7514	14.4347		28.5197	19.358
17.3665	24.0086		46.0059	14.435		56.1235	19.3681
161.946	24.0105		41.3551	14.4361		95.7339	19.3736
157.868	24.0119		165.006	14.4427		58.0025	19.375
33.2201	24.0299		94.293	14.4471		23.5251	19.3932
115.005	24.0366		137.884	14.462		84.2963	19.3967
74.0867	24.0711		72.9286	14.4724		177.398	19.4026
96.9214	24.0745		101.051	14.4739		103.355	19.4405
21.4145	24.0758		133.902	14.4748		157.78	19.4615
157.448	24.0826		62.3377	14.4787		30.5651	19.4665
43.5556	24.0828		106.123	14.4948		47.6209	19.4716
110.387	24.0841		130.799	14.5029		174.792	19.4893
76.3706	24.1054		140.511	14.5066		44.5587	19.4946
161.592	24.1181		107.068	14.5175		29.5152	19.5037
67.4515	24.1777		70.6616	14.5203		19.1667	19.5066
107.211	24.2162		33.5815	14.5233		39.3113	19.5212
81.6793	24.2254		35.4863	14.5245		33.318	19.5255
145.558	24.2357		50.5735	14.5248		143.725	19.5294
52.4204	24.2616		80.6053	14.5291		67.8017	19.5296
39.3135	24.2667		120.807	14.5298		51.0734	19.5451
83.7925	24.2699		115.801	14.5308		137.762	19.5456
70.8049	24.3062		53.0809	14.5318		79.1782	19.5564
149.821	24.3202		68.0919	14.538		33.5	19.5746
157.162	24.3234		96.7367	14.5418		179.42	19.5768
106.929	24.334		42.4741	14.5426		48.4122	19.5792
214.42	24.3379		57.5482	14.554		95.5764	19.5845
75.4549	24.3401		49.771	14.5546		48.8629	19.5848
151.239	24.3457		73.3898	14.5673		152.957	19.5883
122.632	24.3495		85.3489	14.5714		148.187	19.5948
50.6011	24.3506		112.455	14.5747		115.109	19.5988
34.4561	24.3551		129.165	14.5782		108.516	19.6084
116.572	24.3589		37.1688	14.5791		101.575	19.6086
30.605	24.3884		17.7848	14.5833		120.736	19.6162
127.436	24.3905		53.9829	14.585		136.82	19.6255
32.595	24.3991		49.7806	14.5938		38.7336	19.6367
50.9613	24.4367		138.52	14.5978		53.9565	19.6368
51.5903	24.4475		55.4672	14.6005		109.71	19.6442
76.2323	24.4638		112.246	14.6038		30.6483	19.6588
64.0341	24.4715		96.95	14.6152		113.938	19.6613
58.8339	24.5117		181.475	14.6154		153.375	19.6616
134.932	24.5214		124.927	14.62		61.881	19.6695
101.199	24.5233		39.4062	14.6208		85.9556	19.6699
31.5545	24.5318		52.4746	14.6313		32.6856	19.6703
145.91	24.5824		62.9159	14.6329		33.8191	19.6831
82.4959	24.6223		85.2761	14.6363		159.265	19.6844
24.8985	24.6239		43.1174	14.6424		42.8201	19.6886
19.8571	24.6241		114.488	14.6455		149.697	19.6985
168.522	24.6251		56.5	14.6601		72.5675	19.7262
35.3444	24.6539		39.5768	14.6613		131.176	19.7265
29.4556	24.684		38.9821	14.6853		113.719	19.7439
104.019	24.6922		92.3274	14.7		43.9024	19.7649
151.839	24.6986		69.6586	14.7082		109.039	19.766
88.3901	24.6992		192.844	14.7199		65.0297	19.7716
71.5236	24.7027		162.411	14.7208		92.6027	19.7776
47.5821	24.7215		150.483	14.727		35.5151	19.7778
33.9844	24.7283		113.503	14.7276		24.1388	19.7778
112.589	24.7421		72.8623	14.7293		127.451	19.7929
77.4421	24.7821		113.921	14.7307		127.864	19.8005
65.0316	24.7824		67.6698	14.7392		214.35	19.8005
126.84	24.7846		138.914	14.7417		108.988	19.8015
97.3058	24.8234		37.1185	14.7444		120.844	19.8024
89.8693	24.834		48.4798	14.7496		73.821	19.8099
99.2714	24.8357		104.349	14.75		131.789	19.8133
51.46	24.8365		68.5013	14.7551		145.782	19.8246
104.058	24.8403		127.184	14.7654		26.7735	19.8293
134.574	24.8442		65.259	14.784		87.4178	19.8425
108.577	24.8497		61.0592	14.7865		93.9658	19.8488
121.192	24.8499		44.2421	14.7939		148.555	19.8523
143.007	24.8586		157.068	14.7975		31.2896	19.8605
59.023	24.8655		37.1771	14.8043		28.8614	19.8615
89.9116	24.8668		69.3623	14.8098		61.5572	19.8653
77.5187	24.8927		108.839	14.814		70.6413	19.8753
28.2692	24.8931		69.0163	14.817		100.371	19.8775
118.47	24.9027		204.258	14.8182		170.656	19.8804
106.438	24.9154		78.5706	14.8198		50.9486	19.8876
96.8049	24.9259		208.644	14.8223		90.9957	19.8979
29.2778	24.9433		160.808	14.8232		247.837	19.9163
95.0536	24.9474		59.8106	14.8252		90.4928	19.9191
50.4875	24.953		27.0652	14.8254		80.4683	19.9227
85.004	24.9642		53.4314	14.8255		173.816	19.9293
77.8211	24.9895		117.141	14.8263		65.208	19.9295
44.9717	24.9925		116.817	14.83		16.7331	19.9298
88.6714	25.009		74.5539	14.8315		252.163	19.9438
103.86	25.028		107.074	14.8354		104.015	19.9444
37.2487	25.0417		75.7332	14.8426		49.614	19.9481
180.024	25.046		170.156	14.8446		102.561	19.953
91.5467	25.0534		104.177	14.8456		47.9483	19.9688
81.8137	25.0678		47.5733	14.8484		108.36	19.9719
193.531	25.0757		42.8179	14.8527		289.204	19.9743
22.3556	25.0868		98.8889	14.8533		44.5638	19.9759
112.59	25.0908		93.5941	14.8538		147.285	19.9794
59.6536	25.0914		29.2626	14.8557		35.5587	19.9832
169.219	25.1076		28.0511	14.8583		78.9305	19.9864
94.56	25.1101		23.9328	14.8635		31.5663	20.0171
102.633	25.1287		34.4872	14.8677		160.874	20.0222
112.678	25.1293		156.922	14.8684		126.675	20.0256
130.086	25.1323		196.535	14.8708		41.3857	20.0292
75.8746	25.1365		63.3902	14.8732		74.2015	20.0382
113.37	25.1408		60.6022	14.887		117.036	20.0594
22.201	25.1509		166.722	14.8872		33.367	20.0639
285.175	25.1515		62.2048	14.8931		187.115	20.0708
116.757	25.1568		39.8112	14.9091		46.1111	20.0822
42.9124	25.1618		45.9043	14.9152		36.532	20.0852
71.3981	25.192		115.314	14.9206		170.91	20.0935
47.5917	25.25		23.6444	14.9282		165.122	20.1182
189.087	25.261		60.1922	14.9331		40.2626	20.1201
120.978	25.261		174.844	14.9423		133.199	20.1402
100.177	25.264		47.6817	14.9459		67.9212	20.1466
187.175	25.2838		48.5709	14.9481		59.9536	20.1482
50.2056	25.2856		51.3117	14.9523		101.79	20.1585
78.459	25.2882		51.5121	14.967		46.1575	20.1604
145.311	25.2963		120.096	14.9675		18.4357	20.1641
100.994	25.3013		42.8694	14.9742		133.948	20.1688
26.7222	25.302		42.2588	14.9748		87.8175	20.1958
109.31	25.303		55.6014	14.9806		98.1349	20.2032
94.6159	25.3171		91.5961	14.984		23.9795	20.2085
33.3521	25.3864		69.3253	14.9935		37.5558	20.2157
76.6286	25.4072		100.077	15		206.271	20.227
182.858	25.4149		151.897	15.0031		57.7568	20.2305
119.032	25.419		106.839	15.0036		52.808	20.2332
92.6574	25.4274		116.467	15.0038		61.5509	20.2433
131.596	25.4318		185.425	15.0198		43.9177	20.2464
127.954	25.4335		37.4706	15.0233		248.65	20.2655
119.294	25.4454		53.0288	15.03		53.181	20.2725
94.248	25.4586		36.6761	15.0328		41.7348	20.2738
100.488	25.4783		31.6498	15.0334		46.8484	20.2749
112.594	25.4918		38.1721	15.0342		89.3918	20.2839
142.431	25.4971		113.183	15.0387		78.7099	20.2857
136.83	25.517		93.0462	15.0405		147.231	20.2877
53.9921	25.5174		50.7246	15.0405		32.6433	20.3074
79.2389	25.5298		57.6279	15.0409		99.0182	20.3112
115.319	25.567		53.0995	15.0475		40.5326	20.314
150.527	25.5676		94.4792	15.0484		65.311	20.323
46.7622	25.5748		128.791	15.0494		60.9255	20.3252
108.979	25.5923		82.8723	15.0499		66.4057	20.3341
74.9215	25.6018		48.8789	15.0499		39.0157	20.3471
131.858	25.6247		105.631	15.0521		120.298	20.3503
93.6538	25.6268		36.2654	15.0548		70.2189	20.3556
144.594	25.6368		159.456	15.059		129.185	20.357
100.227	25.6959		75.2823	15.0617		163.163	20.3624
24.2269	25.7026		88.2766	15.0644		90.5308	20.3675
164.25	25.7195		122.54	15.0709		26.291	20.3684
141.084	25.7248		92.8925	15.0739		37.9	20.3923
98.5802	25.7289		94.2936	15.0754		37.465	20.4082
146.487	25.7293		26.1044	15.0781		26.8019	20.4106
41.5566	25.7388		22.4157	15.0889		81.6325	20.4277
143.954	25.7639		90.3139	15.0909		118.243	20.4383
105.905	25.7666		114.575	15.0952		84.8871	20.4466
123.566	25.7746		112.775	15.1031		92.6487	20.4644
32.5305	25.7781		73.3693	15.112		50.4391	20.4725
69.0993	25.7942		183.432	15.1189		71.6958	20.4729
137.708	25.8185		44.7895	15.123		73.4744	20.4775
83.5299	25.8196		75.0852	15.1329		27.0844	20.4822
34.7538	25.8236		21.6213	15.1398		142.055	20.4845
110.711	25.8341		137.574	15.1469		39.0508	20.4986
35.7404	25.8378		73.6406	15.1524		131.54	20.4987
185.347	25.8444		67.3324	15.1649		56.2401	20.5
77.622	25.8457		133.074	15.1654		46.0954	20.5031
50.4606	25.8512		116.533	15.1687		71.9225	20.5165
65.0721	25.8581		121.865	15.1713		24.0232	20.518
37.1304	25.8837		57.5778	15.1759		147.172	20.5255
151.864	25.8886		162.365	15.183		32.7683	20.5256
96.1749	25.8889		94.6141	15.204		76.0248	20.5355
103.539	25.8936		106.335	15.2088		34.7171	20.5362
75.0218	25.8997		29.3173	15.2108		52.9197	20.5391
55	25.9364		70.5222	15.2149		37.2179	20.5441
65.7203	25.9375		91.6948	15.2229		29.9963	20.5464
46.4202	25.9484		49.7702	15.2283		31.5567	20.5501
37.6667	25.9663		29.5014	15.2546		46.5366	20.5522
22.1671	25.9755		45.9821	15.2547		87.772	20.5527
151.839	25.9826		25.0486	15.2586		158.94	20.553
50.3921	25.9888		102.85	15.2701		173.786	20.5605
92.3196	25.9986		35.2769	15.2805		49.144	20.567
42.5443	26.0101		69.2068	15.284		50.3872	20.5753
94.8278	26.02		40.3493	15.2847		24.3056	20.5997
88.5096	26.0239		15.4818	15.2945		147.29	20.6091
22.6499	26.031		211.698	15.3032		46.646	20.6111
83.3756	26.0347		108.127	15.3059		76.7692	20.6152
41.8377	26.0382		136.921	15.3102		56.4894	20.6171
81.7316	26.0429		145.828	15.3188		79.3909	20.6258
41.1629	26.0565		102.979	15.3194		59.3095	20.6305
50.4348	26.0646		44.5773	15.3265		77.7222	20.6309
122	26.0652		28.9944	15.328		28.8889	20.6337
198.85	26.0663		70.0203	15.3399		128.41	20.6366
111.512	26.0663		89.0483	15.3463		25.1624	20.6462
237.716	26.0681		14.0699	15.3472		21.8901	20.653
44.2127	26.0716		61.9683	15.3557		29.9011	20.6531
76.5385	26.0984		34.8511	15.3625		139.203	20.6608
163.388	26.1051		124.67	15.3731		37.0806	20.6769
92.8356	26.1459		101.226	15.3765		32.2131	20.6837
80.189	26.1479		57.0228	15.3893		30.1663	20.6843
90.6856	26.201		121.101	15.394		49.1009	20.6929
60.1636	26.2343		51.0062	15.3954		134.25	20.6983
103.684	26.2704		36.0181	15.3991		24.4644	20.7051
117.659	26.2813		158.599	15.4015		84.9565	20.7092
97.4537	26.283		23.515	15.4019		116.006	20.7136
125.446	26.3167		42.8494	15.4044		67.7107	20.7148
175.679	26.3226		156.138	15.4048		112.656	20.7157
19.3106	26.3255		47.2575	15.4141		108.525	20.7175
187.776	26.3285		28.4463	15.4209		183.715	20.7186
168.053	26.3477		99.527	15.4345		75.5753	20.7217
78.6322	26.3491		128.334	15.4363		86.7804	20.7317
271.673	26.42		123.747	15.4511		56.5226	20.7404
70.2057	26.4307		140.402	15.4529		161.926	20.7443
34.6904	26.4324		24.8561	15.4559		115.312	20.7468
219.186	26.4349		21.6997	15.4575		178.579	20.7581
138.901	26.4373		164.597	15.4652		33.0037	20.7646
76.6426	26.4427		53.0507	15.4655		42.795	20.7786
87.8453	26.4433		78.5128	15.4733		92.9533	20.779
201.746	26.4487		151.771	15.4769		64.9464	20.7807
177.933	26.4543		137.586	15.4817		115.64	20.7819
62.6811	26.4863		124.465	15.4862		45.1839	20.7882
14.3607	26.5235		152.004	15.4899		109.304	20.7969
75.2311	26.5398		49.2341	15.4921		21.2794	20.8116
98.566	26.5451		86.1659	15.5087		32.2665	20.8171
109.953	26.5515		45.0812	15.5095		128.412	20.8206
65.0784	26.552		25.474	15.5146		69.8984	20.8218
96.59	26.5574		179.096	15.5188		46.8052	20.8244
103.907	26.5587		83.4289	15.5205		275.873	20.8365
38.1106	26.5753		138.302	15.5238		116.993	20.8792
115.985	26.588		43.5495	15.5352		21.1234	20.8801
163.588	26.5918		30.6899	15.5362		35.0912	20.8846
77.8553	26.6062		69.8661	15.5387		27.5721	20.8849
81.7649	26.6486		31.3684	15.5464		113.146	20.888
97.8561	26.6613		72.3476	15.5509		58.2408	20.8929
121.618	26.6699		89.4144	15.551		119.753	20.898
115.508	26.6718		61.1117	15.5517		151.242	20.9014
63.7752	26.6785		26.6362	15.554		35.7704	20.9019
85.9192	26.6966		31.4319	15.5588		183.056	20.9128
25.9847	26.7252		99.588	15.561		73.7411	20.9149
176.456	26.7505		69.0069	15.5649		88.7692	20.9329
133.321	26.7512		18.0249	15.5653		143.869	20.9423
176.011	26.7801		87.4444	15.5675		44.0473	20.9426
52.7543	26.8216		27.7826	15.5728		113.182	20.9428
37.7378	26.8358		26.9984	15.5815		38.2038	20.9558
92.1128	26.8843		110.548	15.5906		30.3581	20.9564
70.1627	26.892		130.134	15.6092		74.8844	20.9668
28.2877	26.925		25.2923	15.6103		25.9472	20.9672
132.769	26.9486		62.4232	15.613		109.869	20.9775
97.7731	26.9493		120.875	15.6154		68	20.9934
208.344	26.9593		100.945	15.6165		35.9888	20.9935
32.5431	26.9699		127.364	15.6199		94.5444	20.9946
151.352	26.9788		43.7888	15.6212		42.1278	20.9983
47.9242	26.9868		23.0074	15.6325		78.6724	20.9989
60.6419	26.9881		31.5544	15.6345		26.369	21.0094
39.292	26.9988		24.8928	15.6359		53.8591	21.0136
97.7394	27.0107		113.713	15.6478		34.541	21.0316
191.528	27.0233		41.2304	15.6591		17.8	21.0371
177.758	27.0249		134.89	15.6636		79.0627	21.0445
151.152	27.0309		157.623	15.6652		68.9877	21.0451
33.5553	27.052		80.6372	15.6676		48.821	21.0455
70.0376	27.0924		30.5514	15.6693		56.7697	21.0498
136.924	27.0934		210.08	15.6746		55.7028	21.0557
95.4502	27.0993		85.7872	15.6754		35.9233	21.0601
77.5045	27.1147		171.672	15.6826		39.7787	21.0636
30.0831	27.1417		166.177	15.6845		77.755	21.0679
74.2227	27.1738		13.7151	15.6849		41.9962	21.0699
58.8882	27.1843		62.0349	15.6878		77.9565	21.0751
159.762	27.1986		38.7528	15.6909		86.2862	21.0935
21.0571	27.2064		34.3755	15.691		37.9194	21.0962
79.4855	27.2065		121.837	15.6975		55.1322	21.0981
98.4085	27.2377		36.481	15.7072		174.889	21.1043
100.687	27.2489		49.2423	15.7153		23.2249	21.1143
137.583	27.2566		103.057	15.7185		150.387	21.1256
55.0852	27.264		157.777	15.7202		68.12	21.1316
85.5605	27.2867		51.0558	15.7219		67.4846	21.1546
91.5448	27.2968		44.9139	15.7234		45.7317	21.1841
77.0173	27.3597		105.251	15.7263		110.159	21.1947
113.02	27.3807		51.3293	15.7376		26.5638	21.1971
124.318	27.3858		148.732	15.7525		78.3082	21.1975
180.889	27.3887		146.089	15.7539		68.9212	21.2018
84.9457	27.4052		195.391	15.755		63.6782	21.2031
108.209	27.4067		33.6264	15.7583		75.7931	21.2072
159.892	27.4078		112.276	15.7657		166.492	21.2073
143.453	27.4138		63.2149	15.7671		146.971	21.2214
21.8571	27.4145		84.8157	15.7672		77.7458	21.2228
57.8365	27.4245		51.1905	15.7719		106.937	21.2231
50.7713	27.4467		114.743	15.7851		44.1655	21.2441
98.8027	27.4536		100.664	15.7867		37.0388	21.2464
86.7352	27.4566		61.1236	15.7892		76.6226	21.2607
80.7897	27.4591		155.902	15.7958		177.892	21.2608
130.173	27.474		36.4741	15.8061		34.3814	21.2639
40.6462	27.4787		188.452	15.8161		38.3902	21.2645
117.926	27.4826		76.51	15.8285		66.8439	21.2652
56.7409	27.5059		149.344	15.8425		36.3867	21.2692
93.7193	27.5201		74.3361	15.8575		64.54	21.2701
49.0414	27.5284		120.843	15.8582		184.12	21.2819
173.623	27.5658		79.6698	15.8606		43.3645	21.2832
32.8943	27.588		188.658	15.8623		39.8179	21.2841
115.468	27.5929		82.9387	15.8679		34.1049	21.2867
100.147	27.6189		56.3643	15.8741		37.2435	21.2914
58.3894	27.6388		98.588	15.8884		33.401	21.294
48.4574	27.6642		92.0651	15.893		90.0662	21.3221
107.616	27.6649		171.88	15.9052		50.625	21.3242
37.4966	27.6711		49.4545	15.9147		57.2622	21.3247
123.694	27.7034		56.7649	15.9233		86.8231	21.3426
103.782	27.7088		92.5781	15.9239		48.8941	21.3446
143.39	27.7146		222.054	15.9259		47.4243	21.3456
97.4891	27.7559		56.848	15.9263		33.0401	21.3474
60.1688	27.7656		160.689	15.9308		65.3433	21.3517
64.2061	27.77		37.2612	15.9427		184.541	21.3534
56.1375	27.787		34.3947	15.9489		85.3908	21.369
133.89	27.8157		48.1728	15.9633		43.3608	21.37
29.7793	27.8233		41.5439	15.9649		77.2104	21.3706
157.161	27.837		102.853	15.9663		41.809	21.3711
36.0886	27.8447		34.6111	15.9718		77.6062	21.3722
54.2104	27.8578		204.454	15.9772		144.15	21.3889
86.8423	27.8593		67.5445	15.9835		18.3475	21.3898
75.5247	27.8675		113.68	15.9877		15.3097	21.3916
90.8821	27.876		103.807	16.0033		30.2263	21.3955
152.264	27.8899		39.1957	16.0046		99.2141	21.4012
108.794	27.9036		22.254	16.0128		62.6696	21.4023
172.5	27.9671		48.2931	16.0343		90.3165	21.4068
167.399	27.9964		100.199	16.0407		62.2022	21.4117
89.0583	27.9986		32.317	16.0436		58.5207	21.4123
28.3833	28.0522		25.2908	16.0461		75.9794	21.4127
92.5074	28.0526		166.953	16.0497		79.0558	21.4159
158.498	28.0571		78.8439	16.0612		22.3806	21.4437
55.3271	28.0703		179.198	16.074		89.1865	21.4443
111.461	28.0707		41.2902	16.0746		15.9682	21.4462
39.3553	28.0802		121.586	16.0771		67.2359	21.4473
86.4144	28.0816		103.574	16.0815		78.763	21.4508
48.2169	28.0911		219.191	16.0856		74.2576	21.4535
140.655	28.1153		75.3823	16.0976		37.1984	21.4701
27.2379	28.1168		15.921	16.1008		126.678	21.4729
48.4889	28.1453		73.6455	16.1044		77.0257	21.4821
45.9617	28.1544		27	16.1048		177.263	21.4854
115.679	28.157		50.0986	16.1077		20.6254	21.4893
71.0201	28.159		42.6589	16.1093		62.0846	21.4903
92.0374	28.1605		80.6899	16.1141		82.8413	21.4949
98.5745	28.1725		113.544	16.1165		48.4731	21.5274
143.121	28.2406		189.548	16.1189		34.9637	21.5386
104.479	28.2563		51.8502	16.1239		19.2485	21.5448
42.4539	28.2615		47.4915	16.1265		161.04	21.5453
75.6995	28.2693		44.7969	16.1293		99.2554	21.5464
35.2802	28.296		29.9331	16.1387		38.5759	21.5578
23.7413	28.3385		164.972	16.1429		150.214	21.5722
37.7639	28.3523		49.2353	16.1478		24.1625	21.5821
28.7251	28.413		80.1134	16.159		74.266	21.5884
111.925	28.445		27.3659	16.1658		94.6594	21.5969
154.923	28.4474		81.3836	16.169		209.996	21.6189
22.0074	28.4622		66.3692	16.1736		30.1502	21.6248
35.9728	28.4653		118.6	16.2058		30.1607	21.625
122.613	28.4703		83.9944	16.2152		79.6519	21.6381
68.0806	28.4733		98.4431	16.2274		35.5819	21.6409
107.246	28.4805		28.6483	16.2296		39.0646	21.6411
42.9461	28.4861		126.581	16.2374		54.5401	21.6457
76.5637	28.4889		63.4884	16.2382		27.8912	21.649
59.5616	28.4895		154.712	16.2412		111.126	21.6493
148.529	28.533		129.27	16.2491		122.938	21.6522
96.076	28.5436		98.0757	16.2528		159.945	21.6615
110.735	28.5665		124.293	16.2541		60.5453	21.6627
143.213	28.6205		41.3082	16.2565		60.681	21.6675
80.9111	28.6679		64.1669	16.2633		43.9073	21.6686
144.791	28.6699		33.0868	16.2697		60.7795	21.6737
58.294	28.6701		37.1858	16.2711		72.0866	21.6783
25.784	28.6726		110.229	16.2743		44.8978	21.6944
48.3167	28.6955		86.1593	16.2747		81.6145	21.6958
41.4308	28.6997		53.9119	16.2801		92.7254	21.7
147.614	28.715		25.7722	16.2832		157.715	21.7169
146.424	28.7212		102.256	16.2863		74.8729	21.7329
71.8552	28.7598		74.0461	16.2918		177.294	21.7335
101.085	28.783		169.014	16.302		124.633	21.739
91.7255	28.7834		64.9338	16.3154		25.386	21.7526
106.586	28.7919		63.5831	16.3285		62.9865	21.7542
73.5533	28.7947		35.1502	16.3294		122.03	21.7625
148.322	28.8033		138.653	16.336		102.626	21.7631
45.0708	28.8516		66.7172	16.3378		48.8333	21.7749
82.7527	28.859		60.5317	16.3401		127.747	21.7789
127.276	28.8598		39.6921	16.3487		51.6627	21.7833
43.2887	28.8639		72.8008	16.3504		58.4286	21.7879
46.3003	28.868		50.2537	16.3511		90.7641	21.8021
182.425	28.8752		125.275	16.361		72.0858	21.8056
93.9106	28.876		115.227	16.3656		130.972	21.813
88.2	28.8793		80.8766	16.3742		32.985	21.8151
154.56	28.8835		41.5296	16.3766		151.948	21.8211
162.089	28.8981		121.194	16.3868		78.7689	21.8239
214.744	28.9849		86.6007	16.391		42.8397	21.8299
128.879	29.0345		39.7572	16.3953		10.6006	21.8402
31.7603	29.0382		34.926	16.3972		180.696	21.8503
67.7089	29.0816		103.134	16.3989		131.157	21.857
252.496	29.1051		141.317	16.4006		69.3536	21.8577
18.6066	29.125		24.856	16.4104		50.5801	21.8766
54.6469	29.1624		184.932	16.4119		98.6395	21.8838
68.058	29.1654		36.9951	16.4163		32.8438	21.8847
175.231	29.1722		91.067	16.4175		70.5893	21.9136
236.243	29.1731		175.49	16.4279		72.6626	21.9178
66.7056	29.1843		46.9199	16.4313		43.0363	21.9318
118.784	29.192		72.4466	16.4331		22.1865	21.9348
64.3409	29.1937		116.184	16.4379		39.4317	21.9594
134.162	29.206		46.8931	16.4503		73.062	21.9598
99.0138	29.219		79.5703	16.4604		19.6932	21.9736
103.112	29.2254		35.3447	16.4638		21.5515	21.9744
59.8031	29.2263		67.9098	16.4672		89.5518	21.9784
179.438	29.228		123.307	16.4728		59.1476	21.9891
50.0368	29.2284		48.3315	16.473		32.187	21.998
208.577	29.2417		31.9144	16.4774		34.4526	22.0019
98.4344	29.284		90.1146	16.484		30.3867	22.0026
44.3148	29.2847		134.892	16.4842		32.5138	22.0067
79.2595	29.291		106.299	16.5052		38.7337	22.013
53.2289	29.2977		40.3333	16.5119		33.1597	22.0135
53.3857	29.3036		116.837	16.5183		97.7062	22.0144
119.035	29.3067		34.697	16.5335		30.1115	22.0204
164.927	29.3301		80.7948	16.5362		59.48	22.0211
99.981	29.34		44.6123	16.5385		39.7902	22.0261
75.0771	29.3428		36.2587	16.5587		123.544	22.0431
35.6419	29.3531		108.991	16.5632		51.4097	22.053
58.9217	29.3701		134.977	16.564		95.2265	22.0577
213.659	29.3754		69.3059	16.5733		50.1042	22.0634
38.553	29.3823		37.8878	16.5757		92.7736	22.0681
100.138	29.3884		53.5764	16.5769		110.403	22.0713
106.137	29.3909		35.8515	16.5769		44.6765	22.0786
94.8081	29.4209		88.7952	16.603		16.795	22.0833
130.014	29.4223		62.8005	16.6105		39.2116	22.088
240.239	29.4354		76.1605	16.6312		106.755	22.0972
110.554	29.4636		79.5256	16.6409		31.6325	22.1005
87.9498	29.4721		77.3284	16.6443		59.7331	22.1012
58.2492	29.4875		58.5994	16.659		179.699	22.1106
62.057	29.4879		84.5705	16.6754		168.332	22.1174
144.012	29.5295		166.928	16.6854		62.0108	22.1209
98.2027	29.5329		160.158	16.6921		146.849	22.1235
109.373	29.5383		89.5454	16.6926		57.9164	22.1245
161.811	29.5628		181.697	16.6943		103.086	22.1313
152.79	29.5806		194.886	16.6943		117.943	22.1313
73.8346	29.5946		40.7799	16.6981		85.8186	22.1391
94.8812	29.5947		34.199	16.6992		37.9262	22.1404
39.2317	29.6144		74.4461	16.7254		77.8595	22.1526
109.057	29.6231		130.213	16.7258		37.7775	22.1551
84.3753	29.6445		52.4401	16.7264		94.0972	22.1611
40.0495	29.6533		44.331	16.7379		24.6567	22.1657
121.702	29.6776		24.6581	16.7421		129.185	22.1715
76.7513	29.6815		64.7738	16.7455		29.699	22.1809
33.8635	29.7321		71.1459	16.75		60.8059	22.1862
81.8441	29.7596		41.4898	16.75		71.4316	22.1937
155.676	29.7989		97.417	16.7745		68.0211	22.2004
70.8009	29.8017		17.8436	16.7771		26.4554	22.2358
18.1059	29.8208		140.147	16.7803		107.794	22.2374
59.2301	29.8736		112.41	16.7835		77.2811	22.2437
143.964	29.9005		23.9149	16.7863		61.3429	22.2452
53.4083	29.9126		101.165	16.8018		128.489	22.2458
79.3361	29.9319		123.479	16.8148		80.3158	22.2468
68.6333	29.9321		29.2716	16.8149		26.8889	22.247
93.3037	29.9371		172.062	16.817		28.4619	22.2513
43.8936	29.9572		79.0288	16.8281		48.454	22.2612
53.3341	29.9663		97.2174	16.8333		101.37	22.2941
41.4579	29.973		93.9411	16.8333		43.3864	22.3047
75.7067	30.0019		61.1412	16.834		33.3697	22.3095
109.655	30.0174		121.253	16.8372		34.0368	22.3342
26.9383	30.0193		135.665	16.8387		115.19	22.3385
58.8547	30.0529		94.8462	16.8662		141.024	22.3438
152.029	30.0694		146.463	16.8899		157.203	22.3641
131.122	30.0704		31.9941	16.8911		97.4886	22.3688
218.752	30.1101		39.1907	16.9007		36.7578	22.3761
45.2435	30.1256		34.1185	16.9039		61.5044	22.3862
43.8508	30.1647		155.252	16.9099		58.4046	22.4005
38.6235	30.1733		39.0889	16.9355		51.7101	22.4057
224.957	30.1929		31.54	16.9401		55.6098	22.4067
49.7265	30.2033		137.071	16.9424		80.9719	22.4138
34.8695	30.2101		19.7249	16.9577		39.8946	22.4182
83.415	30.2127		40.24	16.9646		85.6743	22.4242
70.3918	30.2284		68.3038	16.9695		23.924	22.4298
165.46	30.2582		43.4822	16.9697		42.7962	22.4304
86.0465	30.2676		78.0581	16.9706		62.7464	22.4377
37.4939	30.275		76.6532	16.971		53.6318	22.4408
77.9631	30.2949		159.89	16.9784		148.509	22.4419
156.888	30.3065		147.621	16.9827		25.8392	22.4509
276.349	30.3178		171.498	16.9895		139.877	22.4671
88.8174	30.3488		143.767	16.9929		54.7835	22.4727
84.9446	30.3588		184.967	16.9938		17.5845	22.4843
112.685	30.3963		40.6707	16.9986		83.1416	22.487
152.138	30.4086		80.1117	17		41.5993	22.489
95.1075	30.4255		131.82	17.0028		84.7273	22.4897
31.361	30.4414		35.6899	17.0032		97.2447	22.4973
55.2475	30.4447		26.4882	17.0098		41.1277	22.5
65.0556	30.4547		55.0849	17.0107		131.694	22.506
98.3958	30.4829		203.221	17.0335		141.218	22.5241
195.225	30.5876		148.74	17.0358		148.526	22.532
36.7337	30.6003		43.8016	17.0554		144.693	22.5326
151.102	30.6562		139.787	17.0665		39.5353	22.5335
128.808	30.6805		117.782	17.0738		148.32	22.5393
46.2807	30.6914		23.6506	17.0881		121.774	22.5471
78.5928	30.6966		124.744	17.094		43.3457	22.5557
73.2341	30.7321		59.7318	17.108		31.8338	22.5779
213.926	30.7377		11.9375	17.1223		45.6145	22.5822
188.471	30.7384		48.2375	17.127		21.0392	22.5962
85.0699	30.7964		86.46	17.1316		85.5339	22.607
125.481	30.8141		87.8638	17.1385		114.104	22.6148
120.996	30.8233		60.9879	17.1526		60.5602	22.619
39.3223	30.8276		31.3496	17.1528		34.2177	22.6316
186.891	30.8591		157.112	17.1562		103.769	22.6431
117.12	30.9132		141.957	17.1569		122.847	22.6489
90.0816	30.9226		128.464	17.1625		126.308	22.6527
118.552	30.9312		53.2694	17.1703		74.5467	22.6528
91.4982	30.982		48.3923	17.1709		36.5983	22.6613
92.9269	30.9876		113.078	17.1826		104.433	22.6673
136.58	30.9881		117.562	17.184		118.804	22.6703
152.031	31.001		53.5839	17.1894		107.656	22.6748
156.889	31.0412		18.1424	17.1966		93.2012	22.6785
136.853	31.0598		77.0601	17.2006		105.54	22.6825
137.384	31.0653		56.867	17.2254		55.9502	22.6833
65.5652	31.0986		136.179	17.2268		62.8355	22.6875
133.834	31.1266		47.2915	17.2366		55.6328	22.6943
47.7221	31.1876		36.9794	17.2519		44.1062	22.6998
102.418	31.1892		85.9195	17.2539		22.6839	22.702
103.75	31.2089		20.7738	17.2577		56.7216	22.7034
95.5531	31.2134		52.2136	17.2642		15	22.7126
128.089	31.2196		38.3815	17.267		30.2199	22.722
54.2117	31.2679		76.9406	17.2755		203.352	22.7338
30.6051	31.3228		122.759	17.2891		138.991	22.7354
91.5216	31.3391		55.2877	17.2905		42.8272	22.7556
70.456	31.3549		25.2122	17.2927		34.7774	22.7571
47.8108	31.3719		66.5698	17.3019		33.9077	22.7731
114.771	31.3875		173.064	17.3035		98.3322	22.8065
88.116	31.4058		165.566	17.3113		44.8586	22.8128
106.668	31.4254		28.8808	17.3135		41.3781	22.8227
127.834	31.4321		112.623	17.3317		63.6237	22.8346
72.4474	31.4446		150.375	17.3333		231.116	22.8621
123.137	31.4673		37.9444	17.3407		48.6879	22.8651
135.624	31.4899		130.566	17.3437		40.4403	22.8677
56.9471	31.5066		41.5957	17.3539		16.7642	22.8904
99.4748	31.526		111.586	17.359		150.176	22.902
152.524	31.5327		44.6585	17.3743		70.1147	22.9167
93.5477	31.5914		141.311	17.3797		123.316	22.9373
96.7449	31.6003		88.7247	17.3834		161.103	22.9419
129.65	31.6022		63.1527	17.3838		52.6866	22.9455
71.7563	31.6377		86.2381	17.3911		109.016	22.9732
29.2644	31.6388		118.412	17.3918		150.135	22.9965
112.213	31.6404		167.713	17.3974		35.1711	23.0093
94.3305	31.6714		82.446	17.4046		132.409	23.0129
101.906	31.6774		60.2937	17.4069		25.6231	23.0252
139.71	31.7459		111.471	17.4196		93.9679	23.0378
102.028	31.7955		30.0861	17.4309		36.2052	23.0423
84.4065	31.8085		128.591	17.4368		126.254	23.0439
66.9481	31.8221		28.1453	17.4373		120.395	23.0496
46.6627	31.8423		85.4156	17.4422		59.1507	23.0564
117.581	31.8481		48.9185	17.4523		90.3086	23.0658
92.0644	31.8562		54.3709	17.4639		111.571	23.0708
110.7	31.8567		202.933	17.464		58.9581	23.074
88.9126	31.8775		171.36	17.4659		51.625	23.0745
45.6611	31.8997		167.967	17.4777		110.226	23.081
77.7094	31.9422		147.932	17.4912		33.7604	23.0918
81.3994	31.968		125.592	17.4928		165.633	23.0919
84.9304	31.998		62.3509	17.5025		150.124	23.1005
148.156	32.0107		13.7086	17.5043		50.5208	23.1074
108.039	32.0637		99.2886	17.5046		80.8489	23.1207
34.5455	32.0793		99.3056	17.5062		78.8074	23.1241
117.586	32.0827		47.0407	17.5094		70.625	23.1252
106.87	32.1161		182.902	17.5174		124.395	23.1256
48.9496	32.1343		58.8754	17.541		27.0613	23.1368
59.6219	32.1441		26.0025	17.5427		106.472	23.1409
174.756	32.1605		89.1761	17.546		108.672	23.1463
21.5203	32.1716		39.6471	17.5488		28.3864	23.1492
75.3059	32.1804		84.1141	17.557		30.5692	23.151
177.523	32.2216		49.4128	17.5591		86.4411	23.1582
73.3091	32.2762		100.49	17.5631		79.9237	23.1649
109.181	32.29		119.853	17.5641		151.679	23.1649
28.8634	32.3218		104.703	17.5652		32.3633	23.1903
60.5696	32.3453		81.8771	17.5776		41.6545	23.1906
101.955	32.4089		119.937	17.581		153.954	23.1943
56.4253	32.4842		48.3627	17.5877		39.3382	23.1986
88.3953	32.4915		43.6977	17.5912		165.091	23.2017
89.0096	32.5096		197.497	17.6013		29.6987	23.2018
91.2169	32.5126		28.0037	17.6016		124.047	23.2298
34.7977	32.5175		126.817	17.6037		160.502	23.2333
71.5024	32.5446		55.3373	17.6139		146.976	23.2347
188.374	32.5561		104.86	17.6148		133.567	23.2542
66.2894	32.5638		99.9608	17.6155		47.7857	23.2683
138.171	32.5887		51.3005	17.616		49.4193	23.2691
63.5119	32.5964		29.4779	17.6181		26.6877	23.275
26.5287	32.5998		36.6835	17.6266		64.3457	23.2785
30.6447	32.63		32.0638	17.6627		52.4769	23.2807
69.9194	32.6376		22.0971	17.6794		143.808	23.2833
48.6289	32.6641		39.9702	17.686		107.032	23.2914
42.1989	32.6786		90.4204	17.6879		40.7323	23.2937
108.136	32.6836		130.245	17.6925		37.3058	23.3153
122.864	32.6937		123.078	17.703		131.055	23.3182
97.5471	32.7254		60.4627	17.7085		71.4384	23.3345
59.1273	32.7554		55.4103	17.7225		27.1116	23.3407
42.5158	32.7609		28.1246	17.7256		51.4032	23.345
67.3835	32.7642		82.9538	17.7298		65.5459	23.3488
152.68	32.7697		207.262	17.7339		65.7785	23.3525
58.5618	32.9055		87.6483	17.7435		27.2743	23.3575
130.016	32.925		136.486	17.7444		39.0295	23.3578
31.662	32.9251		170.858	17.7463		100.688	23.3618
84.967	32.9515		48.0472	17.7471		41.2237	23.3779
58.8369	33.0327		118.425	17.7495		120.852	23.3803
78.2453	33.036		122.432	17.7612		30.1278	23.3969
135.1	33.0364		144.983	17.7696		25.0746	23.4031
[truncated: 1,993 more rows]

## Sheet: Donor 6
Well 1			Well 2			Infected cells
CPSF6	CA		CPSF6	CA		Non infected cells
36.8246	5.27074		33.6496	5.68
19.9119	5.97273		42.9384	5.90634
44.1898	6.42042		21.2745	6.15625			CPSF6 mean	Mean infectivity (%)
11.1133	6.66452		27.5618	6.35389		NS control	91.82	10.438
20.1325	6.94468		26.5833	6.37882
23.7838	7.5531		43.3392	6.48249
30.1122	7.875		37.3535	6.49778		K/D
14.4985	8.02108		22.1531	6.50926		Well	Mean CPSF6	CPSF6 left	K/D efficiency (%)	Infectivity (%)	KD:NS infectivity
26.4157	8.11152		34.7931	6.55301		1	50.7266	55.2457	44.7543	3.94	0.377467
51.0623	8.12403		18.4	6.5671		2	40.0796	43.6502	56.3498	5.93	0.568116
41.281	8.28012		6.07273	6.75113
27.7462	8.35671		37.3676	7.21168
19.691	8.36752		50.3086	7.26979
82.1038	8.53608		25.3333	7.52395
46.6846	8.68214		62.3883	7.6481
28.8595	8.83713		9.50826	7.77869
11.3934	8.84731		20.3817	7.83411
9.62402	8.86914		33.2683	7.92713
14.8338	8.93484		20	7.97167
37.6649	8.98945		30.5288	8.07086
26.6143	8.99065		14.7495	8.07627
23.5446	9.35802		29.9804	8.13687
30.2159	9.48302		42.2599	8.19608
18.0129	9.5875		45.172	8.2402
57.0488	9.59611		38.8594	8.26875
44.7108	9.63542		26.0561	8.27019
51.2799	9.75714		27.2471	8.27143
24.017	9.84358		7.42816	8.30946
27.2046	9.85342		42.1424	8.35395
14.8708	9.85933		17.5802	8.35714
48.1777	9.87243		51.3987	8.39677
22.3586	9.93372		17.4752	8.42651
53.9904	10.09		9.00557	8.4558
33.2579	10.097		33.9381	8.54434
52.0994	10.1258		49.009	8.63004
45.6399	10.1699		39.4419	8.63359
38.5602	10.2593		21.0873	8.64474
35.0618	10.3158		41.3065	8.64565
41.0026	10.3308		33.3231	8.65019
43.4092	10.3378		21.4735	8.66181
49.201	10.3686		24.346	8.68471
40.0782	10.3896		23.8327	8.71429
11.3468	10.3937		45.2179	8.76271
50.3176	10.402		69.8487	8.77933
9.37857	10.4306		47.8223	8.78979
34.9877	10.454		36.8359	8.7954
52.893	10.4748		73.0803	8.8067
72.7099	10.5038		43.095	8.82249
33.7491	10.5282		20.2386	8.84492
15.2349	10.5469		52.4102	8.89346
34.2873	10.5478		28.3459	8.89655
54.9628	10.6657		15.0424	8.98799
19.6707	10.6842		28.8113	9.0056
37.8155	10.7125		13.628	9.02688
34.5506	10.7361		29.1986	9.04096
23.0464	10.7455		50.5486	9.04157
32.6365	10.8293		9.48089	9.0566
45.7126	10.8448		37.0797	9.09319
50.5502	10.8448		53.3385	9.1411
17.4572	10.8594		24.8289	9.21244
54.1283	10.875		36.9828	9.25161
38.7628	10.9512		17.8091	9.26824
47.1879	10.9715		24.7577	9.27548
32.0122	11.0024		49.798	9.30351
46.1871	11.0214		38.2557	9.32581
33.4518	11.1131		30.2452	9.37342
50.33	11.1178		13.929	9.38585
46.9226	11.1284		77.4773	9.38934
24.1034	11.1581		57.7288	9.42628
55.1383	11.2617		28.9228	9.42912
33.5966	11.2673		17.7814	9.48582
61.814	11.2762		40.1953	9.49415
64.7301	11.3392		30.4689	9.51549
41.1565	11.3657		43.8579	9.54768
15.7566	11.4345		23.527	9.57239
65.7681	11.4952		24.031	9.57381
16.8442	11.5129		42.1058	9.58449
42.1466	11.52		50.6888	9.5945
37.3554	11.5879		35.4815	9.61624
55.223	11.5945		37.0332	9.62462
57.7528	11.605		33.0653	9.63584
44.0407	11.6327		32.3057	9.66458
41.7115	11.6541		28.1556	9.67961
12.5742	11.6769		31.8265	9.70088
55.9563	11.6798		12.8651	9.70419
33.4798	11.6914		57.1961	9.70474
35.4669	11.7568		21.8571	9.71538
46.1826	11.7739		46.3781	9.72887
57.2778	11.8101		43.7617	9.73179
48.8804	11.814		15.6343	9.75
12.4583	11.8394		25.4425	9.75145
34.5927	11.8947		28.6469	9.75806
54.5243	11.9158		23.264	9.76161
33.4847	11.9559		54.0958	9.78869
38.0383	11.9606		35.8865	9.78906
45.6585	11.9895		44.3395	9.79205
44.4434	12.031		26.5066	9.79208
6.24132	12.11		31.8894	9.80085
22.3218	12.1351		43.6314	9.80192
27.8966	12.1497		17.755	9.81518
70.5797	12.2005		41.3563	9.82
43.906	12.2044		19.5755	9.83333
45.2537	12.2599		38.0556	9.83721
55.085	12.2665		31.8875	9.86068
14.5275	12.2799		54.2957	9.86127
51.4221	12.3066		33.6971	9.88673
50.6345	12.3327		24.4232	9.89008
59.3686	12.3575		24.1827	9.90952
44.8644	12.3798		27.0582	9.91156
9.80797	12.4059		8.49886	9.92
19.1203	12.4184		38.0696	9.93558
64.2255	12.437		33.7552	9.94097
68.8935	12.4502		17.2368	9.94615
16.1698	12.5196		16.6143	9.94649
44.409	12.5335		55.9009	9.9521
37.4258	12.5667		45.8932	9.97908
54.0277	12.5758		17.2168	9.9915
34.3562	12.5792		13.6157	10
28.614	12.6225		39.6316	10.007
31.598	12.6439		19.279	10.0493
44.5183	12.6536		34.0814	10.0597
7.9186	12.6657		33.964	10.0608
58.7747	12.6783		32.5063	10.0723
21.5474	12.6982		15.57	10.0782
35.5543	12.6994		11.8785	10.0937
18.1885	12.7268		20.9233	10.096
36.3544	12.7488		10.3158	10.1194
37.7735	12.7757		39.9668	10.1213
41.938	12.7849		37.522	10.1397
33.8614	12.7971		41.0094	10.1398
32.1606	12.8105		38.5854	10.14
46.0743	12.8255		38.3401	10.1594
50.9087	12.8554		17.168	10.1762
5.875	12.8646		44.4866	10.1941
54.6776	12.9148		50.101	10.1969
59.5299	12.9191		36.3906	10.1981
49.4431	12.9416		57.8845	10.2304
37.4016	12.9715		32.884	10.2351
58.4018	12.9882		19.4087	10.244
32.1708	13.0387		20.5464	10.2476
56.0634	13.0611		39.032	10.2738
54.6609	13.0657		18.5158	10.278
19.7417	13.1135		23.2132	10.2916
55.3264	13.1198		33.0579	10.3146
48.4568	13.156		4.18478	10.3345
53.0063	13.1609		35.506	10.3532
37.9142	13.1629		51.062	10.4037
51.8513	13.1649		6.50169	10.404
24.2199	13.1943		43.0624	10.4052
55.0947	13.2145		13.871	10.4126
25.5697	13.2169		22.6122	10.4506
59.7568	13.2176		23.6006	10.4583
31.2288	13.2368		39.9176	10.4606
45.9852	13.2408		34.6014	10.4615
18.933	13.2559		26.7533	10.4625
36.3676	13.2564		32.201	10.4635
48.4927	13.2603		40.7401	10.4866
43.5993	13.2651		29.9179	10.5
60.7154	13.2926		40.9795	10.5068
29.2889	13.3026		6.84345	10.5079
38.8374	13.3681		30.2023	10.5189
75.6461	13.3952		9.46056	10.5388
49.6986	13.3965		55.4769	10.5499
24.026	13.4242		24.7719	10.5645
14.2167	13.4256		39.9094	10.5833
16.2677	13.4394		26.3627	10.584
64.9216	13.4599		15.6316	10.5848
44.7585	13.4676		40.0828	10.6011
12.5974	13.5631		10.1167	10.6059
39.1326	13.6022		34.2337	10.6122
74.4222	13.6105		37.9515	10.6166
8.20312	13.6961		27.3827	10.6208
47.9605	13.7095		24.6826	10.6336
57.1122	13.7373		25.988	10.6638
63.3095	13.7662		25.186	10.6934
61.56	13.823		71.0551	10.699
57.4496	13.8556		64.0221	10.7149
51.3394	13.8642		6.11982	10.731
57.4214	13.87		53.2918	10.734
48.8085	13.9085		29.3849	10.7453
50.181	13.95		19.4019	10.7667
13.2834	13.9606		49.0918	10.8073
35.8967	13.975		24.8251	10.8084
44.4844	13.988		39.2431	10.827
63.3713	14		39.9953	10.8369
57.8522	14.0099		41.8204	10.8398
27.4595	14.0275		96.3131	10.8429
80.4748	14.0295		34.7282	10.8439
43.1812	14.0325		38.3789	10.8531
22.1227	14.0786		33.0997	10.8619
63.5732	14.0838		39.2628	10.8738
72.4155	14.1424		31.8465	10.8801
46.1522	14.1745		30.1601	10.9002
73.8957	14.1821		24.1915	10.914
73.9951	14.1923		14.5464	10.9256
7.53093	14.2251		36.6276	10.9336
19.568	14.2262		46.4543	10.9373
43.125	14.2303		27.4728	10.9406
46.4024	14.2365		12.9545	10.9414
59.1402	14.2862		27.9752	10.9556
69.0959	14.3159		44.9293	10.9615
36.7916	14.3341		46.7877	10.9668
46.6818	14.3455		44.8163	10.9731
15.4153	14.3642		36.9776	10.9754
79.1857	14.3842		25.2883	10.9755
59.8299	14.3893		7.34639	10.988
19.229	14.4245		42.9186	10.9918
57.1226	14.4338		37.8152	10.9971
54.8505	14.4503		56.8701	11.0077
8.59135	14.4655		39.8683	11.0196
67.4571	14.4778		52.753	11.039
43.2776	14.4846		40.9757	11.042
60.3984	14.4967		21.1476	11.0766
52.9361	14.5068		9.38569	11.0819
34.8127	14.5335		20.076	11.0826
17.9798	14.5385		46.476	11.0965
44.7519	14.5401		36.6007	11.1159
55.6931	14.5463		7.58299	11.1258
63.6008	14.586		39.0711	11.1352
43.5628	14.6059		22.3354	11.1498
35.6466	14.6157		21.5445	11.1514
50.481	14.6185		22.4953	11.1542
22.7584	14.6207		36.2	11.1576
58.649	14.6894		42.9026	11.1608
30.8478	14.7049		13.9964	11.1799
48.2383	14.7204		35.5886	11.195
66.0848	14.7333		21.6033	11.202
12.4725	14.7376		45.9111	11.2132
29.5396	14.7593		13.9536	11.2248
76.623	14.7714		46.9135	11.281
57.4865	14.7995		28.137	11.2901
51.1605	14.806		53.5655	11.2905
51.4919	14.8387		50.3909	11.2988
48.8747	14.847		38.506	11.3043
33.8864	14.8528		22.5437	11.32
23.2463	14.8563		38.8237	11.3238
10.1153	14.8613		37.9661	11.3318
47.5464	14.8626		47.5458	11.3527
59.6996	14.8725		45.5963	11.3632
20.356	14.8821		31.3668	11.3695
10.2333	14.89		49.4673	11.3777
61.3723	14.8991		30.0471	11.3929
12.613	14.9085		62.2165	11.399
52.3943	14.9433		29.7434	11.406
42.9709	14.9486		27.1524	11.4072
37.1447	14.9494		17.3232	11.4188
76.3691	14.9662		45.7134	11.4239
30.5296	14.9684		36.0565	11.4364
17.8871	14.9936		33.7562	11.4365
94.7974	15.0055		15.3115	11.4369
33.4183	15.0095		16.9701	11.4426
38.3022	15.0202		44.9407	11.4527
64.2656	15.0223		44.8679	11.4591
21.4488	15.0255		58.812	11.5106
65.9878	15.0824		74.555	11.5139
36.3025	15.0939		65.762	11.5148
74.0088	15.1027		38.5186	11.5356
29.5111	15.1289		42.6921	11.5468
49.1602	15.1528		24.1278	11.5795
60.0754	15.1633		12.1871	11.5845
33.4081	15.166		55.216	11.5933
23.4504	15.1714		75.1141	11.6085
52.2669	15.1759		23.6757	11.6324
59.2885	15.1875		20.3725	11.6398
41.0435	15.2112		28.3517	11.6449
47.1137	15.2137		41.6519	11.6757
71.7511	15.2284		32.5417	11.6954
80.0594	15.2304		50.4886	11.696
46.5484	15.2365		22.8924	11.7143
42.7801	15.2462		33.0871	11.7259
56.0244	15.2651		11.0993	11.7389
49.4444	15.2836		17.5744	11.7434
47.1656	15.2862		18.805	11.7512
58.0232	15.2887		29.349	11.752
56.8591	15.2939		20.7521	11.7673
64.8481	15.3107		10.3323	11.7855
46.4456	15.3182		8.27978	11.7857
86.4323	15.3808		9.02675	11.7996
49.5803	15.3942		14.4401	11.8104
50.4186	15.407		49.6271	11.8261
49.6612	15.4173		18.5323	11.8354
57.0939	15.4341		39.6753	11.8476
21.2294	15.4466		18.3357	11.8525
64.6162	15.4569		16.9089	11.8655
70.9072	15.461		41.6473	11.8669
44.098	15.4797		6.24476	11.869
68.6398	15.4817		55.6798	11.8701
50.3507	15.5		32.4516	11.8849
29.917	15.5129		29.9878	11.8852
72.9402	15.5311		43.6823	11.8933
44.3755	15.598		38.1619	11.8958
11.4687	15.627		46.781	11.9022
53.3307	15.6385		44.7552	11.9031
60.6357	15.6467		35.2234	11.9133
78.6667	15.6475		39.9115	11.9188
42.7109	15.6609		14.2229	11.9249
37.0968	15.6689		7.40118	11.9326
57.4633	15.7432		32.0553	11.9345
29.1979	15.7506		39	11.9352
46.9529	15.7851		24.0201	11.9562
55.495	15.8031		64.0025	11.9797
66.5311	15.8082		34.7683	12
19.8802	15.8082		39.2644	12.0123
60.3993	15.8195		9.51603	12.0222
49.3836	15.8315		18.4643	12.0323
40.4479	15.8462		24.8322	12.0397
17.0579	15.8609		12.4355	12.0471
91.8081	15.8832		15.9456	12.0571
75.126	15.8868		18.0539	12.0618
32.1526	15.9016		34.1692	12.0698
40.5268	15.9129		22.1226	12.0778
16.8343	15.9139		31.7932	12.0935
27.3017	15.9296		32.4	12.1111
33.1768	15.9619		42.5163	12.1206
65.5475	15.9692		32.9631	12.1267
32.4734	16.0027		34.9148	12.1338
49.1299	16.0145		73.8419	12.135
19.7606	16.0301		25.0465	12.1429
26.1076	16.045		50.065	12.1473
29.7535	16.0751		23.1621	12.1647
40.5878	16.0896		12.3853	12.1772
44.0498	16.1111		78.4223	12.1912
43.6756	16.1193		12.4503	12.2007
60.4824	16.1205		57.5199	12.2857
49.278	16.1293		32.5625	12.2988
80.7385	16.1627		38.9574	12.3053
47.1244	16.1923		43.0703	12.3103
67.5238	16.2021		16.6111	12.3185
38.0401	16.213		43.3072	12.3225
20.9612	16.225		36.5085	12.3526
31.8365	16.2367		63.8603	12.3653
42.791	16.2615		25.512	12.3763
59.997	16.2645		19.5486	12.4122
67.6109	16.2899		35.8792	12.4202
37.1822	16.2988		61.7028	12.4225
57.493	16.3312		49.7606	12.4398
46.4759	16.3599		13.3225	12.4412
38.1064	16.3924		37.4087	12.4435
62.4868	16.4069		57.9542	12.4587
57.6317	16.4079		93.0771	12.4655
45.1925	16.4112		18.9282	12.466
48.6475	16.4253		50.2419	12.4937
59.7349	16.4328		35.5465	12.4982
17.094	16.4435		41.1121	12.5091
62.1939	16.4596		35.7548	12.5232
44.446	16.4893		47.7663	12.5321
26.0287	16.5188		70.2198	12.5411
64.4791	16.5934		44.9384	12.543
54.0273	16.6327		47.2428	12.5534
44.6287	16.6403		13.5789	12.5556
45.2047	16.6431		15.0573	12.5611
39.5614	16.66		45.8673	12.5623
8.94486	16.6601		42.6006	12.5653
35.1733	16.663		18.4979	12.5669
57.0921	16.6633		70.5831	12.5791
51.9862	16.692		9.88444	12.587
21.3296	16.6986		60.2879	12.5954
77.5368	16.7003		8.02842	12.599
44.6101	16.7079		7.93429	12.6011
38.2105	16.7232		64.1105	12.6082
18.3736	16.738		33.5412	12.6126
14.6227	16.7546		51.9157	12.6253
46.1505	16.7604		44.6838	12.6412
32.9193	16.7828		49.9345	12.6487
19.6813	16.8056		23.9688	12.6598
36.9709	16.8221		58.8669	12.6676
42.3497	16.8277		27.3125	12.6773
73.2274	16.8371		36.9313	12.6941
34.5234	16.8378		14.2649	12.7073
25.6345	16.8401		44.2169	12.7085
45.871	16.856		29.4829	12.7243
58.1636	16.893		44.2349	12.7331
76.969	16.9016		51.6704	12.7345
68.6741	16.9099		41.3562	12.7346
60.309	16.938		31.339	12.75
27.6227	16.9647		38.8506	12.7535
27.2174	16.9792		31.8755	12.757
53.444	16.9865		40.9566	12.7701
56.0637	16.9897		39.5612	12.8059
74.0592	17.0051		49.4815	12.822
59.822	17.0233		34.7318	12.8401
30.5581	17.0418		21.4889	12.8564
34.6773	17.0438		29.2093	12.862
68.1992	17.0479		17.893	12.8669
74.564	17.0574		54.2824	12.8679
38.3537	17.0588		11.2913	12.8928
28.5439	17.0855		54.59	12.8984
64.8864	17.1164		27.4788	12.9061
30.3457	17.1302		15.1045	12.9084
23.2439	17.1342		47.3571	12.9116
15.0392	17.1354		40.9797	12.9157
23.869	17.1375		34.1159	12.9189
57.0055	17.1387		14.8967	12.9274
45.6332	17.1416		14.0758	12.9308
50.3852	17.1433		76.6589	12.9333
67.5394	17.1439		23.8732	12.9401
10.6201	17.1527		41.6426	12.9433
20.8182	17.1585		41.1455	12.9576
56.1687	17.1661		43.1513	12.9763
49.5634	17.1665		41.6056	12.9801
45.9662	17.1872		36.8484	12.9813
46.2968	17.2114		46.331	12.9911
42.8075	17.2415		54.6442	12.9953
41.209	17.2419		30.4545	13.0214
69.6232	17.2506		22.5752	13.0292
45.6707	17.2857		87.7354	13.0296
28.008	17.3		67.9548	13.0297
43.5548	17.3152		18.5505	13.0448
47.8523	17.3294		14.5575	13.0466
15.9884	17.3305		39.2036	13.058
79.0534	17.412		51.8424	13.0614
33.0312	17.4219		56.7669	13.0644
33.0182	17.4237		50.2514	13.0682
43.9848	17.4506		36.6894	13.0734
11.8717	17.4509		86.4518	13.0744
63.4073	17.4693		41.7955	13.0775
46.3401	17.5096		40.0678	13.0779
62.1492	17.5182		58.1448	13.1021
40.8513	17.5226		10	13.119
58.2189	17.5253		44.2494	13.1221
65.064	17.5401		59.7596	13.1317
52.932	17.5433		21.4017	13.1538
22.5918	17.5732		14.004	13.1747
27.2135	17.5977		39.4236	13.1995
59.1927	17.6554		28.0423	13.2013
9.16358	17.6569		31.398	13.2042
61.4379	17.6792		44.3018	13.2045
59.4398	17.6844		43.8918	13.2048
21.1014	17.7012		48.0655	13.2111
28.7683	17.7594		44.7733	13.239
35.7583	17.7786		33.5551	13.263
55.6502	17.779		18.3853	13.2712
73.2602	17.781		38.5398	13.2746
53.4682	17.7946		20.0705	13.2883
49.0405	17.8179		7.51262	13.2884
58.769	17.8213		7.15445	13.2944
20.95	17.8243		57.4382	13.3048
51.425	17.8451		62.2925	13.3271
49.5172	17.8542		58.5076	13.3455
37.176	17.8712		28.5802	13.3607
24.2004	17.8773		39.8162	13.3622
45.2068	17.8854		54.5184	13.3643
41.2761	17.9141		47.6954	13.3656
27.5096	17.9327		50.7616	13.3689
53.0404	17.9375		16.8958	13.3778
23.6338	17.9436		73.1228	13.3798
49.0338	17.9588		38.3991	13.382
51.4761	17.9687		15.1205	13.4016
17.1025	17.9825		28.7867	13.4283
63.1568	17.9955		52.6845	13.4313
59.4983	18.0027		12.0517	13.4552
17.6792	18.0144		16.5576	13.4562
59.0531	18.0284		46.9655	13.4882
27.1815	18.0446		39.6488	13.4899
36.0066	18.047		37.2795	13.4902
15.2368	18.0615		31.091	13.4974
34.8627	18.0815		42.7138	13.5116
60.1477	18.0881		40.0936	13.5159
69.9532	18.1005		22.0756	13.5166
65.4988	18.1023		28.2277	13.5434
37.1103	18.1388		44.247	13.5479
45.6968	18.1754		25.5472	13.554
52.3504	18.1889		9.4868	13.5653
55.6288	18.1912		75.9394	13.5708
40.9524	18.2043		47.1811	13.5784
36.378	18.2087		26.0261	13.5843
57.241	18.2258		58.0785	13.5949
61.5636	18.2261		18.7227	13.623
53.5304	18.2516		45.6576	13.6427
117.249	18.2666		62.8205	13.6639
80.9415	18.2692		45.0784	13.6835
56.863	18.2936		40.5157	13.6846
61.0383	18.3111		24.0177	13.691
82.9329	18.3232		30.5123	13.6944
43.1689	18.3383		60.3438	13.6963
53.2774	18.3511		45.8195	13.7034
55.7389	18.3585		33.7544	13.7143
25.9351	18.3767		60.612	13.7333
59.5741	18.4097		40.8656	13.753
66.5408	18.4392		31.6	13.7616
52.7898	18.5065		36.8973	13.7682
52.332	18.5095		35.3779	13.7775
39.0485	18.514		33.6954	13.7797
72.0942	18.5685		27.8267	13.7913
43.471	18.5745		9.08333	13.7962
24.6079	18.5916		24.7097	13.7965
38.8176	18.602		13.7342	13.822
42.6502	18.6429		47.9829	13.8362
73.1484	18.6509		54.8613	13.8408
25.4842	18.6526		69.4715	13.8421
57.1445	18.6739		36.1483	13.8542
35.7772	18.6908		33.7147	13.8652
55.2369	18.7028		77.0919	13.8926
44.3895	18.7057		53.4103	13.8976
43.2847	18.7076		26.2542	13.9093
14.1438	18.7136		28.3236	13.9164
68.4336	18.749		12.7428	13.932
58.5648	18.7732		37.0888	13.9417
51.5095	18.7839		25.3923	13.9449
56.3223	18.8095		36.9442	13.9487
48.9677	18.8243		78.4968	13.9718
81.1301	18.8558		22.3035	13.9752
46.6427	18.8562		60.6274	13.9788
48.6934	18.861		50.0985	13.989
52.4007	18.8736		7.19502	14.004
48.4111	18.8745		36.5392	14.0061
57.6356	18.8767		28.004	14.0144
10.3866	18.8839		36.1287	14.0157
30.6188	18.9089		49.9271	14.0345
75.959	18.9204		13.7761	14.0393
31.6763	18.9351		49.0291	14.042
41.3225	18.938		39.477	14.0466
48.2443	18.9652		25.3759	14.0531
51.1102	18.9726		27.1981	14.0652
46.9405	18.9833		29.5392	14.0731
73.5466	19.0488		32.9171	14.0848
59.2605	19.0601		16.3485	14.0925
48.7038	19.0737		52.2253	14.0936
55.3283	19.0998		41.263	14.095
59.1535	19.1164		39.5085	14.115
75.0681	19.1189		41.3015	14.121
48.6215	19.1464		41.3736	14.1226
60.1655	19.1476		93.3055	14.1279
66.9728	19.1537		24.9642	14.1302
55.8692	19.1647		30.9083	14.1364
34.9157	19.1655		36.0511	14.1443
52.5291	19.1796		31.7821	14.1493
44.0968	19.1929		56.5286	14.164
107.402	19.2201		11.5675	14.1667
77.697	19.2306		10.6626	14.1793
38.1964	19.2475		71.5066	14.1979
13.6974	19.2505		6.49322	14.2005
47.809	19.2567		24.3514	14.2056
67.8737	19.2733		57.0674	14.2096
61.4541	19.2972		27.8794	14.2139
44.086	19.3168		6.10145	14.2155
46.9368	19.337		42.9157	14.2171
18.3917	19.3403		52.1362	14.2271
40.7445	19.3512		34.5239	14.231
65.172	19.3575		33.76	14.2312
57.4861	19.3638		64.2338	14.236
15.5375	19.3772		51.3456	14.2575
61.7953	19.3845		47.0156	14.2707
26.1564	19.3931		29.978	14.276
21.9505	19.4		91.4493	14.28
59.4653	19.4007		32.1485	14.2816
68.3186	19.4045		19.9097	14.2905
57.5396	19.4102		13.3568	14.3021
63.9214	19.4321		58.5779	14.3046
36.2586	19.4556		12.9299	14.3303
56.1565	19.4644		34.8828	14.3405
76.6615	19.4874		29.8252	14.3589
54.8341	19.4943		64.9377	14.3683
25.4986	19.499		22.1595	14.3725
69.9769	19.5181		36.9478	14.3756
44.0199	19.5287		84.9062	14.3981
62.7616	19.5514		44.5609	14.4035
32.01	19.5625		56.6	14.4091
30.256	19.5726		15.4487	14.4138
70.3292	19.5953		37.0472	14.4322
43.1944	19.6023		41.608	14.4344
9.10396	19.6091		40.2887	14.4363
62.5647	19.6139		49.8636	14.4379
32.6979	19.6205		43.6835	14.4401
42.0664	19.622		90.0875	14.4532
96.7327	19.6228		56.9799	14.4725
17.94	19.6246		59.6022	14.4779
56.0204	19.627		43.6564	14.483
22.365	19.6323		16.1924	14.4841
63.6469	19.6394		26.873	14.4841
62.3922	19.6815		22.1003	14.4881
56.704	19.6847		56.0221	14.5213
52.9962	19.6916		31.8177	14.527
88.4416	19.6944		52.7355	14.5464
28.3708	19.6976		50.6562	14.5932
39.6894	19.7107		18.324	14.5935
33.6765	19.7222		48.36	14.6033
45.5392	19.7261		13.0536	14.6556
38.2571	19.7287		25.8425	14.7015
43.5247	19.744		42.07	14.7086
67.6355	19.7513		49.325	14.7106
38.8544	19.7533		36.7179	14.7222
58.4691	19.7784		42.4717	14.7241
66.3188	19.7895		87.2381	14.7327
37.557	19.7975		14.194	14.7342
20.0486	19.8178		15.4773	14.7374
39.0486	19.8307		50.9255	14.7614
52.7786	19.8316		68.0951	14.7637
30.2765	19.8321		36.7333	14.7647
68.3836	19.8449		35.5485	14.7702
49.6448	19.8559		111.262	14.7791
31.4598	19.857		17.5773	14.817
19.6514	19.868		10.4441	14.8295
21.2287	19.871		9.405	14.8378
51.3259	19.8825		44.8311	14.8395
59.5873	19.8852		55.6467	14.8498
42.1863	19.8898		68.609	14.851
67.3854	19.8934		31.573	14.8656
42.0407	19.8936		13.25	14.8682
63.1798	19.9076		42.7605	14.8938
56.6211	19.9208		29.502	14.9129
61.9755	19.9392		35.026	14.916
52.2771	19.943		54.9877	14.9382
50.0248	19.9564		52.8789	14.9388
10.8205	19.9573		14.1492	14.9438
72.3977	19.9744		34.3322	14.9545
35.1683	19.9835		42.1365	14.9618
35.287	19.9921		10.7701	14.9696
53.107	19.9948		24.7876	14.9825
114.369	20.0317		38.7367	15.0099
22.689	20.0412		22.9208	15.0183
41.6026	20.0569		33.8308	15.0561
41.4126	20.0611		45.8196	15.0634
56.7452	20.0711		123.894	15.0635
43.4126	20.0792		7.3469	15.0794
69.6118	20.0912		47.6062	15.0989
10.0276	20.121		69.1325	15.1089
48.7918	20.1371		40.4095	15.1124
13.8259	20.1519		70.3101	15.1139
29.6276	20.1521		39.8974	15.1361
7.10072	20.1559		44.1052	15.1509
70.0519	20.1713		19.4944	15.1853
32.8007	20.1925		19.3677	15.1872
53.5531	20.1935		48.5273	15.1885
76.4555	20.2147		51.8915	15.192
66.0936	20.2152		65.7935	15.2324
19.8898	20.216		46.5352	15.2377
22.7036	20.2722		47.7104	15.25
30.1564	20.2811		34.5115	15.2615
64.6716	20.3078		58.2252	15.2761
44.9511	20.3121		40.5849	15.2774
30.8328	20.3145		50.5	15.2926
38.2894	20.3153		88.4486	15.293
173.302	20.3174		18.9025	15.299
54.6703	20.3205		44.69	15.3269
22.8165	20.3236		39.1465	15.3608
25.4209	20.3395		13.6125	15.3674
17.4094	20.3629		33.1091	15.3691
48.9836	20.365		161.693	15.3816
72.8088	20.3866		44.8815	15.3867
58.9813	20.3931		60.2137	15.3942
32.9742	20.3962		30.0095	15.4027
40.3017	20.4057		46.7351	15.4029
51.616	20.4157		34.3842	15.435
72.7742	20.4201		64.218	15.4389
33.8317	20.4272		43.0511	15.448
50.4151	20.4274		71.5339	15.475
55.4203	20.441		8.50394	15.4807
59.996	20.486		36.326	15.4811
70.0572	20.5168		39.0992	15.4861
107.931	20.518		48.8132	15.4917
28.0134	20.5187		16.3861	15.4936
15.7443	20.5198		40.0225	15.4974
44.2103	20.5211		7.71984	15.506
84.3019	20.5301		31.133	15.514
64.8922	20.5309		24.2349	15.5195
44.3293	20.5365		129.755	15.5224
44.7742	20.5404		23.3526	15.5405
48.8957	20.5425		66.7476	15.5475
54.4248	20.5725		43.0496	15.5539
48.0894	20.5747		23.9568	15.5651
20.0741	20.5755		25.2617	15.5963
114.244	20.5798		108.376	15.5963
51.7333	20.5879		18.9331	15.604
39.9486	20.5931		23.5174	15.6096
57.1265	20.5938		65.6791	15.6203
41.8518	20.5969		34.651	15.6294
45.8745	20.5992		21.5614	15.6299
60.0558	20.6008		41.1079	15.6303
70.7783	20.6041		66.6068	15.6435
62.8534	20.608		23.283	15.6479
21.6083	20.6173		39.4417	15.6498
74.8225	20.6208		14.7963	15.655
86.5616	20.6335		25.145	15.6805
54.4352	20.654		56.2312	15.6857
55.2183	20.6711		31.1757	15.7147
42.4824	20.6789		33.9914	15.7472
45.0369	20.6811		41.0133	15.7664
37.552	20.6897		53.269	15.7677
22.9136	20.6917		35.9777	15.7803
45.5	20.6985		13.3887	15.7901
57.5558	20.7005		31.4853	15.797
48.148	20.7696		19.1233	15.8194
68.8768	20.7791		46.9417	15.8261
32.1481	20.7841		17.4099	15.8282
36.9641	20.7893		30.8588	15.8302
95.9065	20.8125		31.9499	15.8305
51.3164	20.8242		38.7048	15.8377
25.6916	20.8305		29.0938	15.8475
32.6294	20.8395		18.8366	15.8481
12.7355	20.8472		31.3096	15.8497
66.9972	20.8495		34.7966	15.8516
51.7918	20.8628		9.6	15.8591
52.5366	20.8678		26.7448	15.8954
20.9384	20.9013		30.2234	15.8988
42.5	20.9151		30.6481	15.9046
52.7482	20.92		11.9557	15.9048
29.932	20.9218		6.084	15.913
72.5714	20.9233		10.8556	15.917
50.7004	20.9498		27.0979	15.9203
34.52	20.9511		55.3993	15.929
29.2131	20.9674		39.7698	15.9293
26.5737	20.9755		38.8558	15.9384
45.3815	20.9891		47.2918	15.9567
168.293	21.0072		33.8831	15.9609
23.314	21.0184		44.8299	15.9626
61.7	21.0211		18.3756	15.981
16.4316	21.0455		56.8974	15.986
58.7946	21.0468		20.5953	15.9891
43.2357	21.0541		42.4531	15.9927
67.9679	21.0607		26.9629	16.0084
61.1107	21.0843		55.4589	16.0089
46.7107	21.0969		27.6129	16.0093
45.961	21.1139		51.1707	16.0186
31.2077	21.1167		35.9275	16.0232
37.7452	21.1246		42.1861	16.0475
103.103	21.1321		20.1157	16.0498
59.7368	21.1363		31.0166	16.0672
41.8566	21.1402		54.5974	16.0799
49.2028	21.1431		33.881	16.0816
15.2421	21.1454		52.415	16.0897
48.4615	21.1709		54.2834	16.0936
33.5714	21.2015		33.8945	16.0958
39.4741	21.2047		39.9203	16.1148
69.9268	21.224		49.1783	16.119
47.3324	21.2495		35.5144	16.1242
73.2523	21.2533		66.4726	16.1604
49.8229	21.2555		67.8375	16.1633
55.5768	21.2576		87.5497	16.1692
61.1068	21.2632		58.461	16.1728
46.9178	21.2663		58.0455	16.1826
119.661	21.2786		37.0045	16.202
32.8652	21.2786		25.044	16.2274
77.8154	21.2819		36.367	16.2551
73	21.2874		40.6937	16.258
61.5884	21.2879		43.9243	16.2618
18.4	21.2957		5.74785	16.262
21.0809	21.3048		45.7844	16.2772
61.1804	21.3216		43.5046	16.2781
23.9433	21.3391		34.8754	16.2811
80.841	21.3435		42.1401	16.2829
59.6116	21.3542		40.4986	16.3194
64.4321	21.3584		36.1407	16.3204
19.4286	21.3619		47.4035	16.3325
38.1543	21.3621		26.0093	16.3478
56.29	21.3727		30.2739	16.3639
47.74	21.377		26.8505	16.3688
13.9936	21.3796		17.9928	16.3815
75.9032	21.3939		34.4659	16.4875
48.0241	21.4059		47.6908	16.4876
56.6241	21.4119		34.4378	16.4914
42.8167	21.427		28.6017	16.4991
49.2989	21.4275		30.5049	16.5136
34.2449	21.431		33.4868	16.5138
39.5591	21.479		52.9346	16.5254
45.5938	21.4811		10.1009	16.5355
34.0175	21.4849		41.381	16.537
48.822	21.4915		43.8447	16.5945
129.251	21.494		35.0329	16.6216
45.9497	21.5024		49.4437	16.6225
48.9249	21.506		16.6537	16.6227
24.8945	21.5175		11.5123	16.629
109.84	21.519		78.8464	16.6321
22	21.5215		52.3708	16.6415
61.9799	21.5242		44.0263	16.6429
15.9505	21.5278		31.6986	16.6588
96.4075	21.5558		45.8173	16.6605
57.8813	21.565		37.0061	16.7078
64.0719	21.5724		24.7735	16.7106
41.9685	21.5734		22.9574	16.7279
39.2336	21.5815		49.0552	16.7285
44.8182	21.5836		59.2353	16.7518
35.0771	21.5897		31.7605	16.7528
62.1954	21.5952		25.7721	16.7545
72.2804	21.6		46.6526	16.7576
53.0423	21.6093		24.9928	16.7596
81.8925	21.6376		30.92	16.76
54.3657	21.6396		51.9221	16.7768
37.8874	21.6438		35.346	16.8065
22.9508	21.6825		24.2304	16.8074
29.439	21.6897		27.2485	16.8158
65.3802	21.6955		44.6217	16.836
60.1905	21.7102		28.006	16.8483
38.1654	21.7203		79.2366	16.8563
69.4427	21.7261		43.8801	16.8628
38.3701	21.7282		20.4006	16.8743
70.1475	21.7288		39.8092	16.8907
48.7759	21.7519		86.2185	16.9032
19.4615	21.7551		43.4732	16.9115
44.5285	21.7563		30.3396	16.9375
61.4373	21.7605		36.6	16.9421
32.7904	21.7725		41.5122	16.9426
60.5288	21.7793		32.9064	16.9492
56.8669	21.7906		28.4403	16.9577
36.7914	21.8149		23.6817	16.961
30.6085	21.8268		59.2602	16.9635
20.0418	21.8277		28.256	16.9643
59.5637	21.8378		9.54655	16.9828
66.8705	21.8397		39.1676	16.9843
63.5573	21.847		63.8951	16.9885
66.6516	21.8551		33.3672	17
58.8031	21.8552		37.7319	17
42.4536	21.8685		32.6102	17.0104
74.8746	21.8725		29.6667	17.0112
67.1989	21.8786		21.4768	17.0239
50.5101	21.8809		21.6053	17.0263
53.2456	21.8908		28.8242	17.0281
41.1916	21.8932		40.3506	17.0335
20.5789	21.8996		12.2165	17.0374
35.8195	21.9013		12.3799	17.0409
45.4394	21.9107		30.3343	17.0433
8.21111	21.9308		71.6524	17.0468
38.3386	21.941		46.8009	17.0514
20.3097	21.9432		38.7991	17.1192
36.0291	21.9543		20.583	17.1346
20.9045	21.9551		39.3318	17.1381
66.0569	21.967		44.4345	17.1423
28.0578	21.9748		29.6463	17.1777
49.4393	21.9763		31.7157	17.1813
20.0724	21.9954		24.3163	17.1908
82.5826	21.9987		27.013	17.1959
39.0284	22.0168		14.9372	17.2082
23.5494	22.0238		81.6558	17.2112
17.7757	22.0287		7.8557	17.2224
61.2062	22.0483		40.2741	17.23
33.8316	22.0493		35.225	17.2876
36.1003	22.0582		20.3444	17.2881
72.3653	22.0654		40.3288	17.3053
49.0812	22.0698		42.2698	17.3182
44.0996	22.0726		41.0355	17.3301
48.8289	22.0984		28.8525	17.3352
44.0399	22.1015		40.4747	17.3745
42.7315	22.1056		104.458	17.4201
65.88	22.1128		50.8065	17.4294
43.8864	22.1148		12.3046	17.4447
53.1284	22.1244		37.1949	17.4504
70.8639	22.137		59.5451	17.4613
69.861	22.1385		11.0796	17.504
15.9599	22.1564		30.5251	17.5143
50.5702	22.1598		14.115	17.516
54.8674	22.1622		26.1	17.5216
95.7143	22.1833		35.6798	17.5221
23.2757	22.1928		17.5577	17.5323
36.2934	22.2141		34	17.5324
63.9813	22.2163		55.7936	17.5325
49.5537	22.2244		36.2	17.5511
48.0894	22.2263		120.612	17.5517
73.6964	22.2347		52.502	17.5526
70.2902	22.2379		68.1302	17.5542
37.0751	22.2459		42.0786	17.5632
58.5616	22.2472		10.2979	17.5693
50.188	22.2609		29.5115	17.578
48.8568	22.2652		49.0412	17.5966
15.7826	22.2764		62.4646	17.5993
53.1498	22.2839		39.4452	17.601
14.1541	22.2879		31.1288	17.6019
32.6667	22.289		12.2429	17.6237
62.2657	22.2939		17.7324	17.6278
33.1275	22.2944		67.23	17.6384
23.3516	22.2992		42.7763	17.6411
16.0521	22.3026		26.5083	17.6634
16.3813	22.3091		17.2515	17.6653
69.0749	22.3285		84.9819	17.6737
29.5025	22.3333		39.2051	17.6867
40.9406	22.3531		13.819	17.6978
61.614	22.3611		37.4044	17.7057
48.2235	22.3824		36.4132	17.7201
49.1672	22.3837		46.8089	17.7276
48.6471	22.3941		27.1779	17.75
34.3851	22.396		19.9216	17.7521
68.6045	22.3974		26.8055	17.7662
50.3415	22.4004		77.2857	17.7842
54.9912	22.4042		20.2885	17.8011
23.086	22.4073		35.7896	17.8014
44.792	22.414		19.562	17.8231
36.3159	22.4451		41.7456	17.8371
42.321	22.4472		27.2758	17.8429
42.8068	22.4564		21.5363	17.843
38.3282	22.457		11.1696	17.8676
46.2787	22.4912		48.9571	17.8721
68.4655	22.5059		56.2027	17.8955
70.1274	22.5157		40.5761	17.9111
47.1513	22.5173		31.4603	17.9151
48.0971	22.5241		53.0573	17.9189
73.8494	22.5292		54.0742	17.9195
54.5489	22.5436		56.4809	17.9274
29.5036	22.555		67.3848	17.9301
79.5686	22.5744		38.7862	17.9381
19.1632	22.58		16.1335	17.964
78.5189	22.5824		29.7991	17.9735
15.2464	22.6275		8.56303	17.9833
68.1466	22.6365		89.4658	17.988
22.4336	22.6373		15.3766	17.9892
85.2386	22.6387		53.26	18.0172
84.3904	22.6402		35.375	18.0266
49.8746	22.6483		7.06926	18.029
19.3442	22.6808		29.8445	18.0291
36.3408	22.6809		14.8947	18.0387
49.3036	22.6841		40.6985	18.0398
14.5647	22.6945		24.6692	18.0619
34.1519	22.7027		51.779	18.0774
37.5326	22.7147		21.8916	18.0887
71.9462	22.7513		14.1129	18.0986
65.9785	22.7833		92.5168	18.1013
42.0495	22.7855		107.753	18.1026
25.1449	22.7917		40.4834	18.1067
27.3125	22.7922		8.41206	18.1088
12.3621	22.7924		27.2395	18.1302
36.4167	22.7941		37.1535	18.1334
33.9455	22.8022		38.3676	18.1346
41.4259	22.8111		44.0093	18.139
34.1162	22.8287		35.1509	18.1923
21.957	22.8344		30.6033	18.1948
18.9079	22.8393		39.8651	18.1986
48.936	22.8505		49.6291	18.2096
49.6544	22.851		82.9419	18.2216
30.039	22.8741		36.9233	18.2244
28.0433	22.8965		73.844	18.2349
26.1607	22.8977		28.464	18.2607
54.5381	22.9071		41.9434	18.2637
24.5211	22.9086		27.9163	18.2903
16.4658	22.9174		42.986	18.2953
22.883	22.9307		41.5813	18.2989
106.737	22.9339		30.6065	18.2995
42.5547	22.936		19.0606	18.3127
51.3127	22.9438		8.33077	18.3174
60.636	22.9627		50.3915	18.3189
32.3831	22.9726		23.351	18.3314
44.3051	22.9729		10.8941	18.3392
150.967	22.9756		34.4765	18.3439
88.1308	22.9799		30.1614	18.352
21.5464	22.9981		55.9969	18.3566
47.4138	23.0074		47.1889	18.3621
62.6771	23.0084		25.3227	18.3651
29.1155	23.0124		44.6926	18.3655
59.1133	23.043		19.7073	18.3699
46.7361	23.0539		47.6537	18.3714
53.0786	23.0581		33.2332	18.378
19.306	23.0604		10.4826	18.381
72.6894	23.0653		40.9128	18.3812
54.9433	23.076		57.0909	18.4043
66.9686	23.1202		50.1795	18.4221
55.7922	23.1221		50.5546	18.4233
54.0916	23.1293		50.4139	18.4332
18.373	23.1314		13.6435	18.4634
135.855	23.1346		29.1602	18.4689
35.1309	23.1357		28.5663	18.469
187.462	23.1406		49.1471	18.4929
19.7703	23.1429		10.1743	18.5085
60.9132	23.1454		27.4751	18.5148
40.6145	23.1537		34.9862	18.5185
69.5473	23.1562		28.9912	18.5196
57.8945	23.161		30.8654	18.5201
95.6276	23.1685		9.91549	18.5213
16.3234	23.1738		30.241	18.5789
59.6296	23.1825		35.8893	18.5878
29.5122	23.1926		29.617	18.5906
35.7224	23.2077		91.6589	18.5917
90.0783	23.2206		53.1591	18.5973
78.767	23.2308		57.3654	18.5975
43.8466	23.2459		19.0387	18.6227
66.2313	23.2472		43.5378	18.6357
39.4867	23.2534		15.5261	18.6469
29.0796	23.2688		58.3827	18.6551
28.4195	23.2816		21.4967	18.6552
78.7423	23.2871		40.6278	18.6566
57.5761	23.31		70.0495	18.6576
85.7262	23.3132		25.5787	18.6584
42.4858	23.3216		32.0435	18.6625
47.5125	23.3245		60.3516	18.6689
95.4701	23.3396		33.7493	18.7055
62.0033	23.3452		13.6549	18.7073
53.7861	23.3549		45.4915	18.7138
33.3242	23.3751		76.0639	18.7239
125.87	23.3847		35.9329	18.7711
66.2136	23.3847		20.8042	18.7735
51.5457	23.3847		41.7467	18.7783
21.8743	23.4156		36.9792	18.8109
44.1141	23.421		39.8731	18.8202
16.8986	23.426		54.2413	18.8209
39.1322	23.4316		14.1649	18.8389
67.6931	23.4354		41.9817	18.8439
31.8985	23.4394		38.4686	18.8534
38.3555	23.4416		37.3602	18.8546
74.7643	23.4481		31.5	18.8596
24.0385	23.4706		39.0231	18.8646
92.8853	23.4719		33.8359	18.8725
39.2851	23.4748		20.1878	18.8778
58.631	23.5008		6.72887	18.9119
72.4486	23.5032		39.248	18.9385
57.7632	23.5052		39.622	18.9495
56.1255	23.51		48.0641	18.9594
123.237	23.5231		12.2477	18.9693
34.9535	23.5245		24.0401	18.979
39.2959	23.5364		34.7439	18.992
52.7472	23.5379		54.2568	19
46.4125	23.5403		21.3547	19.0156
138.059	23.5546		22.5418	19.0259
48.7674	23.5639		39.116	19.0291
81.0197	23.5702		53.2776	19.0499
49.6867	23.578		54.0368	19.0542
28.6968	23.5891		29.1246	19.0575
20.3848	23.6087		25.4381	19.0706
76.9968	23.6367		21.6946	19.079
91.81	23.6556		19.6928	19.0866
80.1646	23.6558		28.3026	19.0871
52.4788	23.6751		23.417	19.0921
86.689	23.6763		44.8707	19.0984
55.1556	23.688		16.9686	19.104
70.2934	23.6929		38.527	19.1062
59.8795	23.6933		43.5688	19.1106
90.4962	23.6958		57.4286	19.1426
54.1158	23.7031		107.809	19.1439
156.897	23.7203		53.139	19.1523
56.6392	23.7228		25.3289	19.174
38.9167	23.7232		13.1671	19.1766
74.0769	23.7298		40.3866	19.1937
89.4278	23.7371		48.5836	19.2036
27.4036	23.7372		52.4241	19.2116
70.9916	23.7478		43.2468	19.2263
62.6304	23.7614		9.86691	19.2269
53.4072	23.7657		25.7413	19.2302
32.7877	23.7668		9.83948	19.2463
68.411	23.7738		30.4621	19.2518
42.9298	23.7799		17.4633	19.2543
30.5857	23.7832		58.0741	19.265
64.9	23.7953		45.4679	19.2653
47.7338	23.8059		16.9355	19.2814
92.8395	23.8131		52.0553	19.2828
11.1782	23.816		56.9906	19.2859
9.79018	23.8254		44.8015	19.2965
70.8927	23.8426		40.4225	19.2968
57.3286	23.8512		33.541	19.2989
58.5846	23.8519		36.5182	19.3114
36.8942	23.8534		32.367	19.3168
91.0458	23.8538		75.9802	19.3173
54.9881	23.8588		14.5224	19.3197
38.4115	23.8667		45.8137	19.3277
36.6261	23.8675		25.66	19.3286
54.1116	23.8677		33.2053	19.3339
63.2647	23.8697		16.5865	19.3411
26.6566	23.8766		18.3584	19.3515
21.5115	23.8916		49.9721	19.3675
8.75841	23.8942		29.1067	19.372
43.2984	23.931		18.9315	19.3893
6.94472	23.9313		42.0335	19.4052
50.4735	23.9338		45.6621	19.4141
39.4592	23.944		14.8385	19.418
64.1792	23.9575		11.6411	19.4368
22.2287	23.9607		59.1393	19.4414
66.5186	23.9715		22.685	19.4657
77.655	23.9849		64.9614	19.4781
72.7273	23.9893		95.5988	19.4867
28.1844	23.9914		23.2379	19.4884
36.5271	24.0049		31.5441	19.5067
66.2344	24.0069		9.21471	19.5494
79.5039	24.0386		28.0507	19.5648
61.3382	24.039		30.5654	19.5725
86.474	24.0405		8.43695	19.5837
56.2966	24.0659		32.0325	19.5876
53.0206	24.0831		32.0626	19.5981
40.8558	24.0852		53.4696	19.6082
55.3684	24.1058		36.3453	19.6217
48.416	24.1067		32.9136	19.6595
52.5354	24.1094		43.9552	19.6613
25.1	24.1148		57.9035	19.662
114.703	24.1206		16.5413	19.6673
45.3802	24.131		7.83415	19.6856
40.5137	24.1431		74.9923	19.7007
25.7657	24.162		27.8659	19.7123
48.1652	24.1687		84.0369	19.7519
18.3915	24.1707		43.8136	19.7724
123.119	24.1964		55.2715	19.783
59.6903	24.2009		36.3184	19.7854
50.7031	24.2031		13.4467	19.7867
33.7138	24.2042		14.5279	19.7926
48.0767	24.2065		20.8365	19.8128
28.5728	24.2225		21.9414	19.8188
42.3765	24.2229		13.5081	19.8224
23.758	24.2307		35.2871	19.8401
24.2886	24.2407		14.8542	19.8565
48.199	24.2468		73.8814	19.8571
59.4052	24.2473		89.576	19.875
72.2739	24.2494		80.2077	19.8857
46.1832	24.2545		55.8626	19.8876
29.2844	24.2556		24.915	19.8961
57.5076	24.2588		32.908	19.9043
142.994	24.2685		47.7736	19.9079
84.1917	24.273		30.8127	19.9182
70.2731	24.3065		19.2274	19.9286
31.5407	24.3146		39.1457	19.9511
68.8108	24.3156		38.7934	19.953
63.0036	24.3191		41.2752	19.957
56.3306	24.3297		40.9132	19.9721
69.0645	24.3321		25.5539	19.9781
65.1918	24.3348		33.2417	19.9783
65.2085	24.3351		56.4118	19.982
26.6355	24.3377		60.2674	19.9821
10.6037	24.3423		78.3516	19.9879
58.8664	24.3444		17.503	19.9884
22.9766	24.3482		37.5492	19.9926
38.7411	24.3511		52.1561	19.9932
51.2069	24.3528		14.2784	20.0069
70.8056	24.3537		28.0736	20.0339
47.3218	24.3556		53.9262	20.0364
32.464	24.3713		20.3952	20.0459
67.9337	24.3716		54.837	20.0468
52.2222	24.3875		51.9114	20.0515
31.4181	24.3917		129.919	20.0586
61.1391	24.3943		205.798	20.0612
44.9157	24.4037		27.9501	20.1045
53.8066	24.4069		38.2756	20.107
58.4983	24.411		39.2588	20.1151
54.6298	24.4208		58.6029	20.1339
51.1154	24.4389		48.8412	20.1347
73.5671	24.4446		30.0034	20.1471
28.2099	24.4658		42.0198	20.1593
31.387	24.471		47.3663	20.1612
184.658	24.4766		36.8696	20.162
37.2669	24.4775		43.8196	20.18
75.3539	24.4811		36.9216	20.1821
80.5945	24.488		54.6677	20.1828
49.8258	24.5		21.9913	20.1888
46.4213	24.5211		23.1507	20.1947
78.6156	24.5463		58.1365	20.1975
18.5955	24.5721		20.1601	20.202
51.8667	24.5877		37.9646	20.235
43.0942	24.5892		21.1863	20.2517
38.3081	24.6023		50.9563	20.2635
62.4481	24.6163		40.5244	20.269
30.8048	24.6214		49.4337	20.2971
100.427	24.6303		61.9157	20.2975
45.9368	24.6364		13.4464	20.3047
60.8462	24.6386		8.21983	20.3064
46.2437	24.6462		47.4319	20.3108
48.0628	24.6851		69.8435	20.328
39.7458	24.7151		35.8909	20.3355
63.5696	24.7213		42.5858	20.3367
20.3057	24.7255		51.2184	20.3615
15.6113	24.7408		48.2332	20.3932
48.3877	24.7439		37.9644	20.4305
50.3473	24.7611		40.5622	20.4314
8.50464	24.7746		41.8261	20.4432
81.6908	24.7849		34.4965	20.4496
33.792	24.8014		47.2857	20.4585
31.8333	24.8155		43.4498	20.4801
40.508	24.8246		51.3902	20.4888
38.0621	24.8396		53.1599	20.4964
46.2288	24.8548		112.387	20.5029
18.9883	24.8622		41.2961	20.5096
48.7853	24.8626		5.84424	20.5162
45.5448	24.8692		57.2234	20.5228
47.4775	24.8694		44.55	20.539
33.6505	24.8833		35	20.542
59.8417	24.9131		19.9194	20.542
27.7219	24.9279		41.8148	20.5679
67.9832	24.9303		31.5954	20.5982
17.0372	24.9306		22.2519	20.6012
51.433	24.9385		27.4486	20.6101
51.6327	24.9514		113.488	20.626
20.0036	24.9622		77.9249	20.6269
72.8364	24.9622		63.4863	20.6273
59.8612	24.964		32.208	20.6354
41.8359	24.9641		32.6959	20.6357
40.41	24.9695		48.8582	20.641
30.8545	24.9698		11.3382	20.6568
39.892	24.9754		31.0177	20.6721
39.6222	24.9861		38.6043	20.6874
24.5413	24.9898		41.7686	20.6922
84	24.9967		34.4647	20.6968
10.3421	25.036		12.1609	20.7061
67.183	25.0606		10.1853	20.7063
66.5816	25.0829		21.6131	20.711
78.4834	25.0897		38.3242	20.7165
36.926	25.1059		37.2174	20.7221
64.1621	25.1137		24.5568	20.7243
58.092	25.1269		56.3422	20.7303
48.972	25.1335		66.545	20.7673
31.6543	25.1372		11.6046	20.7917
52.9762	25.1525		40.0489	20.7929
51.6656	25.1528		80.9118	20.7971
41.4491	25.1659		57.7511	20.8107
10.2454	25.1687		47.1326	20.8141
50.3547	25.1763		32.5787	20.8199
58.8857	25.1953		12.0512	20.8263
44.1552	25.1984		47.6061	20.8324
83.2907	25.2113		41.1834	20.8424
79.7045	25.2131		19.1328	20.8475
54.4597	25.2138		55.347	20.8573
70.169	25.2643		67.8368	20.862
52.0191	25.2955		42.524	20.8811
30.3844	25.3098		99.7391	20.8825
29.339	25.3161		33.0401	20.8923
67.2052	25.3186		46.9304	20.9153
44.0452	25.3421		47.6807	20.9187
48.6455	25.349		62.9483	20.9284
132.581	25.3584		45.2746	20.9322
38.2474	25.3642		17.6978	20.9343
46.3739	25.3687		15.4146	20.9509
41.6289	25.3755		7.82783	20.9548
60.2711	25.3834		19.6658	20.9595
48.5	25.3845		39.8232	20.9786
23.7367	25.3912		6.12326	20.9793
6.94253	25.4122		24.9905	20.9847
37.663	25.4166		32.8754	20.9898
62.7803	25.4168		94.1854	20.9908
89.8408	25.4169		35.593	21.002
42.7982	25.4387		7.58238	21.02
44.9213	25.4414		29.2	21.0205
14.4123	25.4552		47.5285	21.0382
42.12	25.4655		27.4644	21.0383
75.7558	25.4679		66.1993	21.0473
36.612	25.4743		44.6361	21.0605
85.7068	25.4746		20.1933	21.0756
32.6248	25.4769		29.0537	21.0787
32.357	25.5073		86.6322	21.0817
18.9774	25.5075		27.5	21.0819
34.4268	25.5268		56.3986	21.0857
34.8561	25.5412		43.3446	21.1034
25.2216	25.5854		44.1132	21.1066
64.0744	25.597		48.7633	21.1389
23.2376	25.6054		58.4281	21.1398
78.1072	25.6141		30.3495	21.1406
30.7884	25.6733		58.6654	21.1495
30.5	25.6757		17.2588	21.1505
39.2479	25.676		18.4088	21.1894
53.8603	25.7175		60.1072	21.2019
43.3621	25.7211		43.2516	21.2264
68.0631	25.7318		28.3906	21.2278
24.904	25.734		35.4107	21.2331
75.3771	25.7692		30.5878	21.2401
8.4522	25.7746		55.4816	21.267
29.6198	25.7839		37.682	21.2729
47.0491	25.7854		42.3376	21.2862
133.963	25.7993		42.8809	21.2955
75.4669	25.8137		33.0299	21.3043
44.8958	25.8309		47.6506	21.3077
55.2468	25.8373		30.7422	21.3363
57.4952	25.8491		43.8566	21.3414
33.6126	25.8627		54.7276	21.355
16.8949	25.8695		36.872	21.3636
51.0721	25.8784		15.8155	21.3641
27.3506	25.8824		14.393	21.3757
49.2626	25.9105		18.6425	21.3807
43.7365	25.9121		50.2414	21.3897
36.6207	25.9148		16.5806	21.3908
35.998	25.9175		15.0319	21.409
35.2464	25.9208		38.8866	21.4268
149.422	25.9227		57.3722	21.4298
49.5035	25.9244		53.7884	21.4336
51.6877	25.9593		11.8171	21.4461
79.19	25.9645		51.043	21.4938
24.1734	25.971		40.6133	21.4993
19.2152	25.9784		32.5085	21.5065
48.5644	25.9811		9.57323	21.5177
106.665	25.9878		59.0368	21.5247
68.8319	26.0179		72.8721	21.5504
59.7727	26.0239		24.4243	21.5542
71.6667	26.0471		44.8594	21.5569
58.5792	26.0637		26.4072	21.5572
62.8816	26.0672		30.0216	21.5892
79.4404	26.0711		31.4655	21.5893
52.1155	26.0734		31.4297	21.6281
63.0822	26.0788		39.7948	21.6391
44.2695	26.0796		137.392	21.6409
170.635	26.1024		61.7738	21.662
42.3306	26.1094		30.6847	21.6628
51.1401	26.1099		53.0366	21.6714
62.3249	26.1161		58.2904	21.6771
72.6466	26.138		32.7315	21.6782
49.32	26.1403		36.4901	21.6812
83.9129	26.155		47.2531	21.6919
67.7941	26.162		51.0123	21.7015
60.4156	26.1644		12.0259	21.7016
71.9721	26.1828		26.1111	21.7067
41.9233	26.1839		50.0993	21.7207
37.0369	26.1965		48.4327	21.7811
75.4512	26.2203		48.2206	21.8004
68.6318	26.2286		25.1842	21.8195
59.4737	26.2378		6.00474	21.8209
64.6441	26.2438		57.0255	21.8235
55.4021	26.2453		43.0916	21.8327
45.1893	26.2542		69.758	21.8366
21.1769	26.2604		37.7614	21.8651
29.6133	26.2632		38.0193	21.8688
23.2322	26.2798		62.2674	21.8797
33.9937	26.3138		28.7345	21.888
70.2457	26.3313		118.092	21.8997
82.6384	26.3445		82.2709	21.9087
59.7946	26.3491		80.2294	21.9331
85.1743	26.3783		14.5321	21.9384
60.5478	26.3996		47.2725	21.9498
41.0479	26.4047		27.1009	21.9509
61.7634	26.4086		48.6813	21.9591
62.269	26.4267		12.2028	21.9673
113.529	26.4428		40.1059	21.9673
154.498	26.4433		14.3529	21.9825
41.5556	26.4472		17.5054	21.9887
60.3745	26.4722		32.5559	21.9965
57.2733	26.4736		75.53	22.0088
54.1995	26.4741		34.783	22.0126
132.326	26.4958		37.273	22.0143
49.2751	26.497		16.6636	22.0245
16.4655	26.4974		37.2131	22.0377
45.1302	26.5042		45.6951	22.0484
60.654	26.505		40.7797	22.0764
26.3616	26.5082		69.3109	22.0817
43.9881	26.5121		44.4021	22.0943
109.546	26.5208		23.1683	22.095
52.4257	26.5387		37.1964	22.1159
53.3723	26.5425		40.8363	22.1178
48.2059	26.5441		41.1973	22.1209
23.3668	26.5456		42.8707	22.1293
53.7837	26.5512		39.9107	22.1444
28.1478	26.5514		71.3807	22.1462
50.6646	26.5527		73.8375	22.1592
41.0741	26.564		42.3042	22.1602
43.7601	26.5753		42.0037	22.1801
132.93	26.5826		68.5729	22.1896
33.6126	26.5941		30.0297	22.1915
72.6157	26.5955		11	22.2426
71.1389	26.6152		73.4345	22.2891
57.4108	26.6209		30.0891	22.295
63.9414	26.6234		28.0212	22.3163
45.6061	26.6329		144.468	22.3189
69.8516	26.6507		66.2145	22.3208
33.1239	26.6546		59.5949	22.3317
63.8587	26.6563		33.2413	22.3465
55.563	26.6655		19.4157	22.3508
40.4837	26.6667		28.7206	22.3589
48.7066	26.6986		53.2845	22.3623
38.9399	26.7244		28.7167	22.3687
13.4008	26.7418		64.8175	22.3766
32.7612	26.75		31.0933	22.378
48.9904	26.7614		22.2194	22.3976
37.7857	26.7718		32.8294	22.4173
54.1475	26.773		64.7273	22.4239
80.7664	26.7769		67.1182	22.4245
20.9571	26.7956		30.9074	22.4335
13.6509	26.7983		58.7451	22.4615
75.1755	26.8		24.9499	22.4761
146.026	26.8032		29.9924	22.5
33.313	26.8107		48.7789	22.5109
43.8927	26.8172		26.4824	22.5126
72.321	26.8219		26.3255	22.5129
63.7463	26.8229		49.174	22.5242
50.7953	26.83		59.7168	22.5267
82.243	26.8308		111.622	22.5303
8.74487	26.8369		33.1794	22.5343
43.1484	26.8437		20.1774	22.5353
41.3881	26.8535		71.5685	22.5458
55.5809	26.8674		44.8225	22.5554
48.7983	26.8784		43.2961	22.5669
80.9665	26.8873		30.8707	22.5794
47.1784	26.8885		60.7329	22.6038
62.6135	26.8898		22.3211	22.6118
39.3873	26.9004		40.251	22.6136
13.9923	26.9124		117.367	22.616
26.8595	26.9148		46.6227	22.6246
64.7822	26.9157		16.3473	22.6453
58.1995	26.9181		64.0383	22.6564
32.5026	26.9304		32.4902	22.6625
33.2052	26.9568		14.4378	22.6643
59.9095	26.9627		12.7681	22.6826
37.7045	26.9799		50.6159	22.697
7.9	26.9945		26.0167	22.7097
108.448	26.9966		46.3177	22.73
28.6443	27.0093		20.5238	22.7444
33.7217	27.0095		11.0125	22.7795
63.8591	27.0163		25.3939	22.8149
63.4977	27.0188		53.3382	22.871
16.1404	27.0198		86.321	22.9033
89.6118	27.0208		28.2407	22.9121
65.9551	27.0243		34.8012	22.9227
42	27.0501		35.3027	22.9366
91.9005	27.0645		47.0248	22.9399
65.4891	27.0699		50.3181	22.9697
103.97	27.0769		52.8381	22.9741
71.2264	27.1134		13.5612	22.9771
63.3772	27.1185		45.9856	22.9923
32.7639	27.1239		40.7866	22.9984
49.6794	27.1244		9.9551	23.0525
55.9614	27.1376		30.8761	23.0587
68.752	27.1378		41.7233	23.0595
65.6941	27.1558		40.9758	23.0639
63.9288	27.1638		37.5095	23.0704
54.4855	27.1673		51.6285	23.0713
16.1977	27.1866		19.0622	23.0782
19.3821	27.1985		42.5457	23.0868
117.031	27.2003		38.9756	23.092
60.3163	27.2113		66.4899	23.0922
42.5625	27.2124		50.0075	23.1145
31.3213	27.2259		86.3642	23.1194
47.8683	27.2552		14.3768	23.1445
63.467	27.265		31.4514	23.1609
89.2925	27.2699		18.9639	23.1661
15.4815	27.2729		27.1652	23.1747
22.3021	27.2757		45.9915	23.1969
149.964	27.2889		55.8359	23.2016
26.9328	27.3047		8.71233	23.2504
65.1231	27.3491		20.7217	23.2534
39.5556	27.3503		23.7425	23.2573
35.6032	27.3577		30.0213	23.2618
12.4953	27.3844		71.5726	23.2789
44.5833	27.3988		9.31971	23.2818
67.0519	27.4085		15.7929	23.2937
6.95353	27.4136		43.7399	23.3045
101.359	27.4225		36.498	23.3075
50.3319	27.4353		33.875	23.3107
30.8792	27.4397		44.6283	23.3148
32.4198	27.4458		25.4797	23.315
16.5296	27.4584		26.2984	23.3247
48.9565	27.4694		48.3732	23.3438
70.3675	27.4735		76.0076	23.3642
13.382	27.4843		16.1556	23.3653
80.1888	27.4876		69.4915	23.3669
60.0079	27.4946		71.5852	23.395
126.586	27.4946		35.0215	23.4081
60.7256	27.5177		33.1579	23.4204
42.2016	27.5206		46.0202	23.4221
11.2272	27.5336		13.356	23.425
64.3474	27.5498		40.3028	23.4314
25.4526	27.5807		21.7948	23.4545
69.1801	27.5809		35.0685	23.4567
57.5297	27.5877		9.53351	23.4592
115.72	27.5949		52.384	23.4835
45.0085	27.6014		52.9922	23.4842
64.0712	27.6046		43.3831	23.4887
61.6534	27.605		55.8726	23.4933
46.7853	27.6056		45.5774	23.5072
81.3801	27.6096		57.3991	23.5224
8.37269	27.6154		63.3529	23.5541
19.2941	27.6194		118.722	23.5557
49.1398	27.6208		26.6088	23.5769
9.58824	27.6318		40.5962	23.5868
82.2911	27.643		57.0161	23.605
15.8985	27.654		88.2518	23.6526
42.565	27.6618		24.7099	23.6795
13.2455	27.6816		48.3661	23.6931
57.0651	27.738		81.5039	23.7086
42.8571	27.7486		72.6006	23.7119
49.8629	27.7529		46.4976	23.7126
72.4607	27.759		17.9658	23.7622
47.9069	27.7608		62.9975	23.7714
75.5	27.7668		27.8314	23.7722
101.631	27.7856		66.604	23.8158
64.1725	27.7862		36.8602	23.8366
74.7339	27.793		47.6288	23.885
48.6949	27.8238		56.9615	23.8852
75.2181	27.831		10.7755	23.8941
88.471	27.8423		48.1909	23.9318
144.949	27.8453		30.3648	23.9533
41.4398	27.8585		26.5284	23.958
56.7506	27.8661		27.7326	23.9701
11.439	27.8766		109.636	23.9882
25.3882	27.9205		72.4008	23.9924
39.3918	27.9454		48.3089	23.9952
75.7679	27.9853		119.762	23.9977
57.2326	28.0013		32.8592	24.0061
50.5556	28.007		48.6092	24.0222
63.128	28.0222		24.639	24.0279
97.2612	28.0285		51.8729	24.0349
29.4884	28.0301		15.8116	24.0379
61.4382	28.0498		39.5783	24.0397
50.1157	28.0665		28.0639	24.0487
30.8915	28.0678		8.77083	24.0679
63.5333	28.0823		57.2885	24.0736
48.6677	28.088		43.7672	24.0884
39.5582	28.1128		36.899	24.095
66.0401	28.1197		26.7485	24.101
45.487	28.1211		51.1452	24.1047
45.5825	28.1285		52.1076	24.1359
10.817	28.1342		25.8685	24.1385
35.2299	28.1452		32.4943	24.1649
76.0979	28.1795		20.1944	24.1863
103.63	28.2046		53.7202	24.1942
44.312	28.206		43.8648	24.2176
52.6955	28.2116		86.2394	24.2242
27.5718	28.2229		7.74621	24.2625
52	28.2371		67.8346	24.2722
13.4959	28.2413		54.0668	24.2793
50.4744	28.2414		61.2447	24.2854
78.3777	28.2458		21.4014	24.2897
80.3994	28.2479		21.3817	24.3429
55.1643	28.2514		61.4831	24.3496
61.1542	28.2877		30.0125	24.3641
56.8898	28.2884		24.1048	24.3774
43.6735	28.3021		76.2818	24.379
70.2641	28.3084		47.0538	24.3808
9.64164	28.3121		49.5439	24.3826
45.3968	28.3246		53.2461	24.4109
57.7171	28.3465		31.9474	24.4554
62.0771	28.3629		15.2784	24.4608
63.7638	28.3649		50.8434	24.483
73.7234	28.3666		47.118	24.5031
35.4378	28.3675		73.6306	24.5167
101.436	28.3685		52.4795	24.5226
49	28.453		149.322	24.5681
61.7273	28.4542		53.812	24.5766
52.9737	28.4554		81.9621	24.5887
72.1667	28.4639		13.8148	24.5987
87.9448	28.4831		34.7902	24.6115
17.8791	28.4888		64.3087	24.6195
10.1837	28.5038		50.0227	24.6263
45.607	28.5176		16.9192	24.6549
29.3224	28.5296		45.6456	24.6778
75.3549	28.5323		63.7482	24.6936
53.7455	28.5557		47.0127	24.7086
61.7585	28.5582		96.511	24.7121
60.1781	28.5618		22.6564	24.7201
95.2469	28.5711		19.4395	24.7245
81.0902	28.591		37.5694	24.7837
56.7487	28.6534		38.4293	24.7961
101.746	28.6542		28.9127	24.8017
69.4611	28.6646		13.565	24.8044
66.3922	28.6947		55.9625	24.8081
49.8685	28.696		55.023	24.8541
34.1116	28.7025		36.3333	24.8829
41.7171	28.7321		51.4085	24.8929
8.88855	28.7538		46.5915	24.9164
48.5017	28.757		79.1395	24.9263
75.642	28.7576		46.8722	24.9286
40.5897	28.7617		16.9342	24.9339
114.733	28.7627		47.7778	24.945
51.4622	28.8		64.5147	25.0299
62.4113	28.81		32.3264	25.0385
57.1466	28.8137		9.8678	25.0503
28.4417	28.8202		76.7393	25.0914
54.8593	28.8224		41.0292	25.1212
43.704	28.8268		23.6186	25.1256
73.0927	28.8678		35.13	25.1339
63.1741	28.8731		54.8729	25.1375
64.1821	28.8741		132.317	25.1439
44.5013	28.8751		32.5301	25.1678
38.3958	28.8762		64.7871	25.2422
54.7992	28.8972		96.7445	25.252
84.8007	28.9152		14.276	25.2695
115.308	28.9217		52.138	25.2721
74.7417	28.9236		60.4452	25.2775
52.4874	28.9444		18.946	25.288
28.8909	28.9453		42.2888	25.294
37.3935	28.9733		18.7433	25.3051
73.3634	29.0019		16.278	25.3127
57.1075	29.0117		52.5067	25.3187
40.2945	29.022		34.4864	25.3519
46.6455	29.0416		27.3448	25.3585
7.59327	29.0424		68.7055	25.3646
73.1569	29.0436		43.5522	25.4051
41.3592	29.0478		119.034	25.4168
73.8578	29.0482		34.7753	25.4573
21.7306	29.0639		23.4036	25.4757
17.1254	29.0713		88.3201	25.4831
17.586	29.0941		38.2862	25.4911
43.7888	29.0982		44.9172	25.5027
75.2903	29.1009		109.934	25.5128
24.6835	29.1169		19.866	25.5262
96.6187	29.1342		42.8946	25.5405
45.725	29.137		52.0123	25.5472
74.9014	29.1746		53.2857	25.566
65.2111	29.1775		74.1549	25.6212
105.375	29.1776		8.65397	25.6327
43.493	29.1889		20.0169	25.6413
84.446	29.2084		31.1119	25.646
72.6127	29.2169		13.2	25.6512
13.4361	29.219		39.7192	25.6651
19.4164	29.2309		90.429	25.668
96.0665	29.2393		76.0846	25.695
27.9751	29.2608		19.1058	25.6992
56.0303	29.2613		64.5112	25.7229
38.7197	29.2967		17.0226	25.7427
35.8329	29.3097		13.9109	25.75
73.658	29.3213		7.57709	25.7521
38.749	29.3399		44.0554	25.7718
12.6988	29.3545		24.6703	25.8355
32.5353	29.3644		37.3089	25.8499
53.2941	29.3759		17.6527	25.8606
32.7853	29.3945		39.6447	25.869
45.3708	29.3951		29.284	25.8702
52.436	29.3982		43.0325	25.8783
29.9424	29.4417		25.1991	25.8872
74.4083	29.5067		20.2083	25.8877
85.6197	29.5083		30.9618	25.9218
36.6093	29.5234		55.9489	25.9237
70.4388	29.5352		97.8018	25.9366
31.491	29.5452		17.7665	25.9479
10.9262	29.5635		26.8494	25.9483
79.7111	29.5751		57.8876	25.9688
44.8929	29.5806		31.8211	25.9917
120.115	29.586		162.423	26.0427
73.2122	29.6047		52.6857	26.0458
43.6333	29.6097		75.4231	26.0501
47.5422	29.6172		176.687	26.0823
28.5292	29.6322		17.8534	26.0907
56.3357	29.6341		47.1535	26.1183
32.3787	29.6453		64.7163	26.1469
70.4357	29.691		22.1005	26.1646
8.34688	29.7088		27.7624	26.1815
48.3889	29.7201		5.88119	26.1955
36.5802	29.7329		38.7037	26.197
74.7717	29.7356		34.5019	26.1975
20.5792	29.7866		70.8532	26.2318
22.4639	29.8329		18.6899	26.2639
27.8761	29.8392		27.6783	26.2826
7.33766	29.8593		112.768	26.2981
90.307	29.8897		40.1714	26.313
32.4971	29.8988		112.977	26.3451
64.8107	29.9435		8.93767	26.3521
119.488	29.9492		57.9931	26.3704
80.5986	29.9644		33.6918	26.3722
14.822	29.9742		26.093	26.403
154.716	29.9815		15.8109	26.4066
70.2282	29.9836		17.9073	26.4307
55.7179	30.0093		32.6412	26.434
87.9201	30.0107		11.4351	26.4494
147.245	30.0514		44.8223	26.4634
61.6255	30.0738		9.84979	26.4666
12.5405	30.0814		120.625	26.467
13.8063	30.0817		26.5768	26.4808
59.1887	30.0982		65.824	26.4814
55.0429	30.1325		47.1258	26.5042
62.2563	30.1573		64.1633	26.5261
61.8947	30.1775		28.8979	26.5309
51.3252	30.1877		9.61818	26.554
16.5446	30.1882		8.2381	26.5986
51.0073	30.2019		20.194	26.6136
57.3231	30.2057		77.4	26.6191
68.1082	30.2671		33.8443	26.6286
46.1111	30.2804		88.5968	26.638
70.8389	30.2857		27.5	26.6414
63.4598	30.2982		26.4267	26.6735
73.6295	30.3081		40.0645	26.6941
60.4257	30.3106		53.4066	26.6998
8.49582	30.3339		15.8371	26.7023
15.7733	30.3955		89.2327	26.706
43.3532	30.4049		52.608	26.7115
163.105	30.41		20.3244	26.723
8.40977	30.4121		36.0662	26.7253
12.9636	30.4179		24.7197	26.7521
78.5263	30.426		28.5627	26.7543
86.0488	30.4462		22.6895	26.7622
79.5448	30.4548		30.9309	26.7638
95.3618	30.4667		50.6857	26.766
62.7065	30.4802		39.7079	26.8133
164.028	30.4862		17.7212	26.8141
15.0427	30.5194		37.756	26.8601
50.9143	30.5289		13.5468	26.8717
49.5429	30.5325		37.7405	26.882
25.877	30.5351		10.8424	26.9364
35.0854	30.5514		77.1459	27.0036
55.9167	30.5539		130.495	27.0164
34.2909	30.5746		62.5152	27.0705
55.2421	30.5824		22.7864	27.1639
60.7575	30.6		63.5687	27.1648
62.4706	30.6236		46.2259	27.1814
51.4987	30.627		24.0506	27.2705
30.3165	30.6329		27.8607	27.2814
30.5121	30.6334		73.8301	27.3078
37.8466	30.6576		66.6731	27.3181
35.1317	30.6661		52.8846	27.3184
57.1213	30.6818		29.035	27.3271
32.2336	30.7263		14.434	27.3341
56.1394	30.7275		20.6639	27.3688
76.0126	30.7336		41.0707	27.3817
65.272	30.7456		116.901	27.3849
45.4644	30.7704		133.62	27.401
46.7426	30.7809		64.3628	27.4126
67.1167	30.7955		56.9427	27.4303
47.5	30.8038		50.6784	27.4499
54.4887	30.8049		68.0896	27.4771
49.9632	30.8061		36.3179	27.4864
44.5594	30.8118		38.5727	27.4927
16.7402	30.8219		29.6822	27.5134
37.2137	30.8488		14.5102	27.5172
26.9872	30.8607		38.8208	27.5958
42.5067	30.9203		149.45	27.6194
15.7596	30.9291		13.7273	27.6524
49.1085	30.9443		147.168	27.6671
97.3592	30.9452		20.1818	27.6924
55.321	30.9475		46.0203	27.7031
35.6142	30.9606		59.2876	27.7047
57.9377	30.9786		49.9271	27.7169
112.675	31.0037		13.7173	27.7183
22.7702	31.0082		21.2222	27.7448
53.8552	31.0296		37.7714	27.8143
53.4752	31.0355		41.2029	27.8534
32.4472	31.0355		16.085	27.8639
134.322	31.0403		42.4582	27.8758
41.1826	31.0474		18.7016	27.8799
53.9055	31.1107		64.1567	27.8957
48.592	31.1215		5.95979	27.8987
59.0562	31.1509		13.8227	27.9038
48.296	31.1884		47.5	27.9253
16.632	31.1948		24.1759	27.9476
61.8937	31.2003		25.4061	27.9663
17.7253	31.2033		10.6166	28.0498
64.311	31.2111		23.9614	28.0615
29.6618	31.2179		38.1032	28.1067
42.7252	31.2517		29.6502	28.1221
18.8078	31.2541		107.155	28.1283
79.8696	31.2582		106	28.1303
22.2843	31.2799		76.2263	28.1677
61.8721	31.3034		13.6923	28.2004
83.4939	31.3159		22.443	28.2759
93.15	31.3561		17.6362	28.3378
20.8571	31.3587		87	28.3972
62.1745	31.3634		25.4825	28.5085
12.4592	31.3668		21.6561	28.5256
49.2073	31.3719		61.2824	28.5465
52.135	31.4113		40.0451	28.5665
56.4196	31.429		24.0685	28.6164
85.9079	31.4684		56.5562	28.6521
54.8395	31.4693		36.5563	28.6922
67.3248	31.4902		34.988	28.7146
61.2283	31.4948		29.6021	28.7395
75.0025	31.5416		55.575	28.7461
75.5299	31.5606		22.5672	28.8269
73.2773	31.5738		20.842	28.8365
46.8163	31.5755		62.2756	28.8957
27.5288	31.5992		58.8937	28.9041
37.1373	31.5999		46.9917	28.9419
75.2579	31.6388		20.5545	28.9453
73.2479	31.6519		57.1129	28.9503
57.0049	31.6623		12.9648	28.9784
66.0554	31.6677		29.8086	29.0053
47.8829	31.6809		61.2355	29.0268
93.0122	31.6933		49.9791	29.0351
69.8997	31.6956		16.0219	29.0481
24.6073	31.6985		37.4686	29.0517
46.7427	31.6992		86.4576	29.0577
52.6299	31.731		11.8029	29.0658
56.413	31.7398		124.222	29.0736
26.2566	31.7408		58.5305	29.1687
38.5241	31.7574		39.2958	29.2164
32.7934	31.7662		14.9784	29.227
68.5126	31.7699		40.8767	29.2466
39.1574	31.8104		41.0736	29.3283
38.8109	31.8349		18.5876	29.3962
29.2579	31.8354		42.3438	29.4733
52.9912	31.865		72.64	29.4876
38.0397	31.8748		54.978	29.5054
25.1742	31.8822		72.2257	29.5493
29.0139	31.8828		158.469	29.5599
113.271	31.8911		18.9435	29.5691
49.0117	31.9106		27.4127	29.6084
85.0476	31.9278		19.0648	29.6294
45.9444	31.958		81.8549	29.6339
55.5917	31.96		59.4706	29.6369
63.3795	31.9845		36.4509	29.6414
47.488	32.025		21.8519	29.6579
95.9439	32.0609		28.0379	29.7013
24.0141	32.0965		76.3279	29.8208
80.8083	32.1328		97.5882	29.8478
68.5946	32.1573		15.3659	29.8545
56.2918	32.1618		13.7083	29.8964
78.733	32.1659		124.915	29.9496
71.7116	32.2172		22.6517	30.0047
30.1079	32.2401		5.35236	30.1076
129.396	32.2627		18.2232	30.1451
34.309	32.2703		44.2333	30.1878
42.3799	32.272		45.3346	30.2377
29.6565	32.2804		48.5275	30.3042
31.1054	32.294		43.1805	30.5123
142.753	32.3047		42.0588	30.6577
50.6321	32.307		80.2105	30.6722
48.9321	32.3102		39.2381	30.6725
30.6541	32.311		33.1541	30.6958
33.7899	32.3144		44.7231	30.7034
35.6235	32.3232		25.3862	30.7163
63.3492	32.3394		121.897	30.7632
24.3629	32.3416		13.5141	30.8343
55.9828	32.359		9.86579	30.8815
59.6	32.3659		39.8006	30.8956
67.2552	32.383		22.1527	30.9061
31.2005	32.3966		45.8617	30.9313
50.2089	32.4373		88.9873	30.9485
107.831	32.4443		10.4591	30.9598
56.7521	32.4575		44.5333	30.962
74.8892	32.4614		51.343	30.9942
18.2148	32.4656		44.3676	31.0348
59.3125	32.4739		77.5494	31.0609
92.3647	32.4862		70.1222	31.0875
52.0962	32.4899		39.5659	31.1207
53.6966	32.5455		30.3075	31.1902
47.748	32.5701		9.73826	31.2254
54.2892	32.627		12.7253	31.2391
58.3946	32.6615		30.0843	31.2443
16.1791	32.7345		15.1707	31.2861
21.0158	32.7391		48.6825	31.3215
10.8905	32.7419		133.43	31.3501
73.2449	32.747		12.9751	31.38
79.8105	32.7527		17.2042	31.3855
112.976	32.8571		50.3739	31.4511
39.8908	32.8791		45.2902	31.4699
15.2581	32.916		48.9941	31.5553
14.6436	32.9185		54.8194	31.5629
19.6545	32.9411		61.0246	31.665
56.7075	32.9715		26.9975	31.7024
79.069	33.0211		48.5652	31.7211
20.8	33.1086		65.7839	31.7987
50.2131	33.1406		60.9594	31.8622
65.2018	33.1732		60.8413	31.8812
10.1239	33.194		25.775	32.0131
72.987	33.2068		71.708	32.054
109.603	33.2096		115.608	32.1429
131.073	33.2241		21.5637	32.1769
64.0402	33.242		11.6322	32.3359
79.8854	33.2813		24.4606	32.3465
67.4	33.2984		122.525	32.3694
18.1726	33.3		27.6128	32.3951
73.0664	33.308		27.1438	32.415
73.4653	33.3341		36.0186	32.4263
50.7931	33.3424		31.5678	32.5354
68.007	33.367		14.0802	32.5725
70.4402	33.4108		39.6347	32.5757
43.2748	33.4125		55.3599	32.5764
24.8233	33.444		17.9318	32.6013
34.9759	33.5074		32.9357	32.6207
51.8414	33.5243		20.1865	32.7637
28.7709	33.5416		78.4163	32.8433
14.4425	33.553		39.6227	32.899
73.5748	33.5756		10.9321	32.9466
66.5086	33.5815		46.5879	32.9598
160.02	33.6241		28.3478	33.0168
48.6291	33.6297		27.3295	33.0853
36.1448	33.6338		8.38697	33.2799
64.8435	33.6667		30.64	33.2957
53.1498	33.6679		21.0055	33.322
24.0304	33.6986		85.3319	33.3716
83.6409	33.7205		73.2429	33.3785
69.3484	33.7387		31.4498	33.3807
34.4536	33.7409		94.1825	33.4017
58.8881	33.7433		122.36	33.4089
41.0979	33.7467		18.1178	33.419
59.021	33.7535		20.5978	33.4818
83.4102	33.7977		38.1183	33.5906
17.3557	33.812		27.6356	33.6057
73.4194	33.8127		93.9805	33.6151
62.7024	33.8194		15.837	33.6635
58.3168	33.839		35.519	33.6866
30.5387	33.8474		14.1304	33.8712
42.7027	33.936		21.1506	33.8893
18.7715	33.9828		43.4696	34.0517
13.1599	33.9853		56.1835	34.0718
80.665	33.9959		31.981	34.148
10.3463	34.0167		14.9192	34.2016
66.8926	34.06		27.685	34.2559
23.836	34.0655		83.9911	34.2838
64.0296	34.0819		8.99724	34.2966
29.5614	34.1032		7.61625	34.3205
67.2059	34.1209		19.5483	34.3958
51.9104	34.1225		19.3516	34.3978
29.5182	34.1235		24.5098	34.4265
47.2944	34.1349		87.1646	34.4632
5.81641	34.1746		23.6376	34.4798
51.9624	34.1891		56.7263	34.5535
70.9636	34.2003		46.9384	34.6267
31.2518	34.204		110.869	34.6765
63.4534	34.2213		15.3303	34.7691
31.9145	34.2261		25.9792	34.7718
45.8706	34.231		10.3482	34.7863
59.8396	34.2442		44.0987	34.8228
49.1423	34.2572		16.7785	34.8352
77.4829	34.2925		45.1763	34.9667
41.4552	34.2974		13.2997	34.9744
149.874	34.3128		32.7528	35.1854
73.472	34.3132		74.4729	35.2405
19.5871	34.3351		49.2069	35.5625
44.3942	34.3531		54.8719	35.606
66.9271	34.3551		74.0065	35.6296
48.5798	34.3557		22.1816	35.7081
62.7746	34.369		26.4267	35.7569
97.8711	34.4247		13.6823	35.7591
60.2046	34.4296		15.1073	35.9169
81.8279	34.5517		82.4512	36.1337
22.7768	34.572		12.9783	36.1862
175.087	34.6133		75.7723	36.2114
79.52	34.7094		49.7696	36.3174
17.3073	34.7606		59.2252	36.4263
59.623	34.7937		82.013	36.4379
53.5421	34.7965		17.3863	36.4611
28.3351	34.808		59.5269	36.7018
33.1792	34.8147		82.2275	36.8966
45.1845	34.8192		97.8151	37.0034
70.7681	34.8421		17.7746	37.1384
18.4824	34.8954		34.8241	37.2
6.86325	34.8974		50.367	37.5558
71.4403	34.9117		9.46229	37.6915
61.0795	34.9192		26.2867	37.7123
97.8172	34.9761		75.519	37.7482
27.998	35.0276		35.959	37.7887
63.7427	35.0331		100.194	37.8576
48.8087	35.0405		33.7617	38.1783
57.0364	35.0583		61.3202	38.3917
63.0684	35.0661		97.662	38.4356
73.1983	35.0666		35.2455	38.4593
88.5964	35.0987		16.9509	38.5795
55.47	35.1197		38.7732	38.5941
56.1446	35.1537		46.6633	38.7335
64.9862	35.1756		37.3919	38.9112
13.8271	35.2197		41.8603	38.9216
63.8051	35.2304		38.4536	39.1163
53.3793	35.2714		72.209	39.562
59.8427	35.3838		33.6769	39.632
70.1299	35.4027		45.0217	39.6717
57.4634	35.41		21.2121	39.7265
62.5182	35.4222		39.6107	39.8338
35.3136	35.4239		18.9813	40.6113
103.492	35.5129		44.6271	40.8083
52.8464	35.5497		28.6972	41.0937
51.7007	35.5528		71.8293	41.445
37.308	35.5605		33.5866	41.5125
68.2035	35.5761		18.2924	41.515
84.3208	35.6266		19.4647	41.6188
18.6103	35.6392		25.8708	41.7382
67.5256	35.6781		9.75188	42.3609
12.2583	35.7367		17.8523	42.5201
93.5168	35.7593		46.9152	42.6297
75.5701	35.7723		23.2862	42.7253
64.6548	35.7952		15.942	42.7433
16.7159	35.7978		21.6105	43.006
66.9455	35.8062		11.7247	43.2002
30.2014	35.8164		27.2517	43.2147
88.6695	35.8409		41.557	43.3491
43.5114	35.9113		50.8075	43.8753
56.4959	35.917		51.301	43.9692
70.4244	35.9231		80.9423	44.1445
48.6144	35.9833		40.1929	44.3876
10.2866	36.0422		13.5229	44.7347
38.7639	36.043		18.7838	44.7655
21.0677	36.063		30.3012	45.3192
70.276	36.1106		43.9774	45.7966
30.2733	36.1882		48.1179	46.0151
69.2863	36.2406		46.9524	46.4596
71.6418	36.2578		21.3902	46.6743
92.1501	36.2727		23.8387	46.8784
115.327	36.3303		10.39	46.8799
35.9779	36.3769		14.3889	46.9825
67.3529	36.3812		23.1723	47.0008
22.0808	36.3882		26.0294	47.3194
118.177	36.392		66.6422	48.6496
58.2662	36.4016		39.3852	49.3105
91.6308	36.4172		38.5175	49.935
48.2537	36.4255		18.8136	50.571
69.1324	36.5144		66.9813	51.1442
12.2269	36.5701		44.3135	51.1506
51.3288	36.5794		34.3584	52.0495
60.3879	36.6066		27.9355	52.1256
25.729	36.6187		43.1775	52.1432
101.62	36.6309		22.9975	52.3088
104.691	36.6704		67.0714	52.9721
29.0941	36.6769		88.0364	53.0756
32.1667	36.7377		22.6759	55.0177
102.24	36.766		12.6608	55.702
61.2225	36.8686		78.439	56.7943
55.571	36.8843		36.2007	57.9737
22.7774	36.8916		52.9316	58.6321
11.8889	36.9385		11.6136	59.2951
14.5211	36.9976		12.4173	59.8606
31.3881	37.0708		69.4615	61.4554
15.2192	37.1105		17.3026	62.8473
79.6109	37.243		36.0524	63.0047
19.8483	37.2532		25.1704	63.8227
63.6689	37.3094		79.066	64.9282
71.5682	37.3097		83.4561	65.1884
41.497	37.3714		32.3868	65.4025
86.4505	37.3819		37.7251	65.9976
88.1195	37.3916		33.7115	67.4803
51.4529	37.4023		48.0446	67.6153
46.249	37.4127		7.9607	67.7288
47.516	37.4246		40.32	68.2756
27.1984	37.4298		28.8199	68.4641
57.2882	37.4444		7.01592	68.9177
67.1509	37.4448		33.2981	69.1237
49.049	37.494		42.5213	69.1632
12.7243	37.4956		46.991	69.9971
75.379	37.5025		23.9383	70.1259
101.592	37.5511		6.94344	70.3987
78.046	37.5642		49.4044	70.4443
20.8657	37.5955		90.8889	71.5014
52.3856	37.5958		8.52033	71.6455
78.7675	37.6271		35.1085	71.7463
37.518	37.6727		47.4143	72.2339
84.2367	37.7282		27.7059	72.8486
55.5353	37.845		88.3801	72.9344
36.3203	37.8852		62.5061	74.663
37.2899	37.8965		64.7044	74.736
68.3725	37.9071		29.5685	74.7388
52.7765	37.9101		35.0028	74.8636
56.2857	37.9481		27.9823	75.8409
59.254	38.0624		77.9612	75.8892
10.2906	38.0637		58.5429	76.1786
60.7511	38.0722		53.7089	76.5335
18.9704	38.175		24.2779	77.0054
53.6123	38.2892		78.4931	77.1473
74.4383	38.3574		66.9574	78.0777
62.5654	38.3636		53.1174	78.3361
45.9068	38.3844		29.3695	78.4776
52.8618	38.3892		26.7581	78.7076
[truncated: 273 more rows]

## Sheet: Donor X2 +LV
		CPSF6	CA			CPSF6	CA			CPSF6	CA			Infected cells
		690.997	2256.72			1464.67	1923.61			2538.65	2570.14			Non infected cells
		1393.11	2017.35			1703.42	1901.13			799.342	2475.23
		1836.05	1712.49			1754.35	1865.73			1000.43	2140.85
		1792.26	1701.56			576.287	1835.74			627.083	2102.86				CPSF6 mean	Mean infectivity (%)
		1875.55	1697.17			1106.05	1824.15			1904.39	1881.03			NS control	695	1.23
		1964.33	1671.05			1718.93	1779.76			1366.84	1667.12
		296.607	1658.87			726.9	1778.21			2000.68	1628.36
		570.078	1609.63			2014.46	1773.38			1359.76	1590.5			K/D
		957.374	1600.87			169.664	1764.01			1218.89	1585.96			Well	Mean CPSF6	CPSF6 left	K/D efficiency (%)	Infectivity (%)	KD:NS infectivity
		1576.14	1593.09			298.883	1761.39			1074.87	1584.27			1	906.506	130.433	0	2.4	1.9512
		1918.36	1551.15			1255.39	1735.89			615.752	1556.16			2	929.251	148.68	0	3.77	3.065
		503.698	1526.33			811.482	1731.13			915.741	1519.51			3	935.581	149.69	0	1.27	1.0325
		1914.79	1514.38			1147.23	1661.24			894.492	1511.77
		927.389	1513.61			1615.06	1637.38			1037.37	1501.37
		902.67	1507.05			1461.8	1628.36			1072.08	1501.1
		1173.44	1459.19			1158.42	1624.62			1023.08	1482.56
		1008.37	1451.65			1616.96	1582.9			1169.03	1475.61
		1054.37	1444.67			367.602	1571.52			738.643	1420.14
		740.509	1438.55			737.411	1566.51			445.509	1396.79
		900.403	1433.67			2217.8	1561.27			1478.03	1393.79
		919.227	1426.28			910.204	1539.6			206.37	1373.59
		1287.97	1421.59			1030.07	1510.99			1194.21	1358.05
		989.493	1409.74			634.364	1504.15			473.27	1354.08
		754.59	1409.21			523.143	1501.2			723.811	1345.54
		1415.21	1396.06			1517.46	1497.92			795.584	1345.38
		1112.77	1393.86			1461.13	1479.16			1281.95	1333.21
		2136.34	1369.31			1632.2	1479.08			1791.85	1331.75
		1128.79	1364.12			1573.27	1475.75			1857.84	1330.81
		1056.17	1339.46			1663.93	1466.89			977.061	1311.76
		1559.36	1336.28			1027.23	1461.08			801.352	1308.43
		829.842	1332.68			1635.56	1441.03			1115.89	1297.41
		1637.07	1328.57			1213.73	1408.3			1350.02	1292.9
		1318.21	1321.11			1143.74	1401.79			1392.85	1290.11
		529.023	1320.66			744.617	1397.38			1002.13	1289.67
		1287.44	1314.22			1063.51	1372.67			1151.97	1278.37
		1293.3	1299.25			993.493	1372.01			1595.67	1266.95
		875.126	1295.92			2125.71	1371.28			1020.4	1262.43
		1588.55	1289.23			929.821	1363.36			1921.98	1261.59
		1256.56	1271.47			1720.89	1358.59			1789.73	1261.03
		1558.94	1256.26			1551.91	1355.1			1410.73	1257.33
		1215.2	1254.47			1103.66	1347.94			2045.89	1252.39
		1007.31	1250.19			1022.21	1340.04			1513.71	1245.59
		1554.19	1248.1			1611.81	1333.4			1098.82	1243.97
		1075.82	1245.3			936.451	1328.54			1191.72	1234.34
		1060.75	1244.44			1321.72	1327.16			1061.14	1218.57
		1054.34	1243.55			1205.16	1316.59			1124.69	1217.34
		1324.02	1242.82			1519.19	1314.88			1271.82	1217.3
		1282.05	1242.32			1603.5	1313.99			383.372	1217.13
		1358.09	1227.46			1541.71	1310.51			1158.26	1214.42
		1790.69	1226			1230.38	1307.35			1366.28	1210.34
		571.41	1219.67			1382.93	1306.68			1052.93	1205.98
		1458.27	1219.07			918.768	1289.33			1031.26	1203.09
		1058.96	1216.68			1199.01	1286.56			1843.15	1197.91
		1597.59	1216.17			1819.6	1278.75			726.978	1191.01
		242.093	1207.34			1428.82	1264.67			1087.91	1177.95
		1366.78	1202.95			892.812	1263.37			1521.68	1177
		1191.72	1199.21			1092.54	1257.73			967.802	1170.74
		1215.43	1195.98			1816.18	1253.02			1815.3	1168.8
		537.249	1194.58			1235.52	1252.45			1720.82	1168.64
		968.095	1193.75			835.968	1252.33			1045.18	1153.64
		1250.56	1192.69			1805.59	1250.05			1259.89	1152.59
		453.283	1189.99			1131.59	1249.98			860.618	1144.48
		1729.19	1188.59			864.203	1247.66			1027.16	1143.64
		1113.58	1170.35			1769.99	1246.3			553.43	1143.24
		1258.48	1157.8			1409.26	1242.45			1499.99	1139.26
		1127.36	1156.79			440.825	1218.18			1087.78	1137.86
		1590.23	1155.79			406.776	1210.66			1900.84	1137.31
		1702.64	1154.1			1519.45	1208.39			1050.63	1129.57
		528.325	1141.58			1140.91	1205.36			1282.71	1129.04
		527.282	1138.99			1372.52	1201.61			1093.34	1126.69
		904.335	1134.72			1546.14	1201.37			623.295	1125.45
		1526.36	1133.06			1427.76	1195.76			263.766	1124.32
		1418.31	1125.62			762.182	1193.82			1022.13	1118.92
		1604.99	1122.21			1072.16	1189.9			434.72	1116.07
		1400.63	1121.82			590.014	1178.91			1063.48	1112.46
		1238.35	1108.08			1436.95	1177.79			1272.49	1109.74
		905.398	1101.42			1433.72	1175.88			707.134	1107.75
		1066.29	1099.33			1709.92	1174.79			1795.3	1107.36
		980.505	1097.9			1074.87	1173.94			627.706	1107.3
		1117.65	1093.95			1221.75	1166.83			880.48	1107.19
		1303.59	1093.9			600.459	1153.54			1809.55	1104.41
		1144.86	1090.44			1089.27	1153.47			746.702	1099.37
		1408.39	1082.07			1612.03	1145.82			1216.53	1096.19
		1589	1079.96			747.985	1144.92			1183.27	1090.24
		1999.27	1078.41			1519.81	1139.51			1784.29	1087.15
		1156.92	1078.19			1001.05	1135.03			969.375	1083.87
		842.979	1078.12			1198.49	1122.03			548.009	1083.79
		1938.6	1073.47			563.195	1121.36			705.297	1083.33
		1303.66	1072.37			537.404	1119.66			1348.26	1082.48
		1619.43	1072.31			1026.31	1119.5			991.264	1082.06
		1300.89	1071.27			1641.62	1117.44			837.71	1074.46
		1801.59	1070.31			1105.54	1113.94			932.682	1074.12
		1418.5	1069.51			1545.22	1112.71			536.813	1073
		794.353	1065.85			1548.24	1112.08			1135.09	1070.7
		1343.88	1064.38			1591.64	1105.91			1832.95	1070.45
		547.212	1063.36			1154.09	1100.28			950.788	1063.93
		1608.72	1061.51			629.388	1098.03			1720.26	1063.32
		799.852	1061.32			914.022	1095.5			2245.23	1062.77
		1530.56	1060.85			1398.83	1091.43			1561.86	1062.37
		858.798	1058.67			495.815	1087.38			1309.93	1058.99
		1197.25	1055.22			1250.77	1086.72			1272.72	1057.52
		496.628	1054.11			1231.15	1085.11			1326.92	1057.31
		1401.72	1053.37			291.447	1084.98			1050.91	1055.85
		1154.74	1050.54			1267.08	1082.76			642.776	1055.72
		834.092	1044.57			1222.3	1081.72			1549.44	1052.24
		954.649	1031.28			1403.22	1078.09			1598.92	1048.96
		1552.14	1026.36			1971.55	1077.62			865.39	1043.55
		1569.51	1026.12			999.639	1074.45			553.71	1041.65
		1742.3	1023.83			594.03	1064.3			1327.86	1039.51
		1785.04	1023.38			1463.1	1061.67			1737.85	1037.7
		1593.48	1022.1			1723.43	1058.07			1989.21	1034.52
		1205.74	1022.03			479.27	1056.48			1181.43	1034.16
		740.262	1020.69			436.83	1052.42			1152.99	1033.49
		1554.24	1019.85			965.982	1051.9			563.919	1029.77
		1690.34	1019.41			2243.89	1048.8			1708.66	1029.68
		631.462	1019.19			702.289	1043.67			1728.24	1028.88
		1354.75	1015			1004.68	1038.72			548.562	1028.13
		1393.63	1013.82			275.845	1034.71			1485.58	1025.53
		654.223	1013.56			1258.22	1033.91			1396.32	1025.11
		1097.41	1005.99			362.451	1033.05			887.827	1024.99
		1033.97	1003.38			1155.86	1032.57			978.142	1023.98
		1360.53	1003.2			1785.37	1031.13			1161.13	1023.68
		782.178	1001.88			588.342	1030.44			1326.55	1022.87
		845.752	1001.39			1783.06	1028.48			831.024	1022.46
		1270.44	1001.1			2023.9	1025.29			1068	1015.05
		183.962	999.252			1119.06	1025.13			679.353	1014.73
		901.372	999.135			272.469	1019.93			1231.85	1007.99
		761.025	997.729			769.412	1019			1182.6	1006.68
		1532.19	994.756			1564.44	1018.8			1359.17	1005.42
		1173.75	993.197			991.614	1018.23			813.823	1004.42
		1438.54	992.579			1208.92	1014.95			746.749	1003.45
		377.693	990.962			1563.29	1011.34			1437.11	1002.75
		1146.96	985.169			1660.5	1010.38			521.188	1001.44
		909.764	983.153			1032.12	1007.93			977.327	1000.92
		264.318	981.884			1026.93	1006.67			1281.85	999.889
		1303.14	980.444			681.035	1001.95			1497.47	998.43
		637.977	976.808			1311.21	997.876			757.837	996.647
		1543.27	976.352			948.993	997.781			912.142	993.86
		1284.69	975.238			488.242	996.958			1258.36	993.712
		502.541	973.127			698.465	996.373			1596.16	993.415
		952.924	967.62			964.665	994.404			532.938	988.22
		1558.59	965.178			852.486	992.581			1243.95	986.408
		1594.78	964.773			1467.04	988.287			935.22	983.212
		1315.38	963.289			1376.59	985.641			899.787	982.44
		1219.83	962.572			1069.3	984.75			1254.9	980.594
		612.618	961.064			1181.48	982.741			909.328	979.939
		1451.6	959.56			1248.89	981.241			432.787	979.479
		1408.25	958.901			938.01	980.897			1283.11	977.513
		1653.45	958.052			1902.8	980.531			818.313	976.86
		477.984	952.528			1708.55	977.448			715.31	974.672
		1438.26	952.472			1094.49	976.716			576.907	974.361
		718.686	952.195			1204.04	973.351			1404.43	970.996
		1471.94	949.746			1851.51	972.755			1650.55	970.985
		1787.54	948.774			1031.86	970.333			1111.23	970.55
		843.113	948.712			824.704	970.319			566.677	968.041
		1248.89	946.417			1088.08	968.668			371.311	967.794
		531.296	943.691			1139.5	968.075			1180.22	966.623
		1020.79	942.431			1064.62	966.129			1301.65	966.23
		1365.22	941.441			964.623	966.068			405.018	964.649
		1721.82	939.416			733.638	965.935			1579.25	963.962
		390.969	939.205			1275.19	964.198			1650.12	963.054
		1227.45	938.999			1914.05	963.671			1475.01	961.115
		296.928	938.867			1614.99	962.976			472.104	961.09
		1419.82	938.817			1084.46	961.119			1103.34	960.921
		936.874	938.339			1049.34	960.481			993.481	959.078
		1420.19	936.813			851.248	959.345			1590.74	958.8
		1039.76	935.797			592.777	957.456			980.905	958.7
		1681.91	934.67			1315.8	957.159			692.037	956.812
		697.152	932.947			1537.47	955.215			1645.52	953.799
		821.15	929.963			1675.55	955.198			603.354	950.869
		1429.4	920.908			408.924	952.013			729.404	950.476
		1206.55	920.111			263.649	951.464			769.633	949.664
		735.33	918.634			1693.4	951.084			1338.14	949.217
		789.098	918.496			1497.29	950.554			946.801	946.978
		691.21	918.338			1706.58	946.305			1370.39	946.834
		2000.96	916.069			857.325	944.536			1449.14	945.431
		1281.25	913.518			1948.18	944.215			1465.04	943.694
		960.049	913.478			1552.97	943.083			825.36	942.936
		812.512	907.452			944.556	940.375			889.765	942.441
		666.424	905.889			1559.29	938.731			2193.98	941.836
		1102.64	905.563			2160.38	937.113			1590.07	941.49
		1052.7	904.822			561.444	936.385			1694.13	937.196
		723.183	899.921			1054.2	935.656			1397.54	932.919
		829.653	897.928			1289.88	934.261			750.01	931.321
		1258.96	897.843			1339.19	933.53			1389.94	930.59
		1442.06	897.285			438.741	932.65			739.23	929.87
		1333	897.203			1006.62	931.909			1321.29	929.504
		1703.68	896.621			1594.73	931.078			1266	926.65
		1365.86	895.825			1301.95	930.408			586.453	925.543
		1115.84	895.5			1248.45	930.054			1196.1	923.385
		785.525	889.903			1738.45	928.036			408.881	923.122
		313.358	889.526			1754.54	927.391			1364.58	922.589
		1289.13	887.933			1410.81	925.493			671.129	921.879
		416	886.832			1432.75	924.882			815.477	921.527
		148.506	886.468			1273.62	924.148			905.957	921.444
		1188.62	884.435			1748.69	923.971			1135.61	920.724
		1133.45	883.423			740.906	922.96			1630.25	919.782
		179.313	875.659			382.812	921.307			1115.58	918.156
		1409.67	875.079			778.909	920.074			1728.72	915.275
		1297.6	872.689			1480	919.569			1035.23	915.152
		247.799	872.235			1156.32	919.288			425.7	914.857
		737.372	872.154			880.04	916.814			1272.91	913.667
		475.521	871.397			1710.28	915.017			1427.66	913.068
		539.229	870.867			1396.89	914.289			1044.55	911.806
		676.355	864.775			1269.29	914.238			570.913	911.324
		970.929	864.423			1515.96	913.846			1014.53	910.337
		240.661	864.109			1866.38	913.162			518.117	909.629
		816.094	862.868			993.757	912.766			2240.67	908.869
		1071.46	861.794			581.568	911.993			1148.7	904.877
		329.867	860.907			1163.27	911.968			1166.66	903.706
		1014.81	857.038			1906.31	911.747			1530.96	903.208
		1658.03	855.821			1192.75	911.737			1446.59	903.131
		1079.88	851.597			387.342	909.646			829.54	900.446
		710.849	849.728			998.653	909.258			1164.59	899.935
		1488.24	849.247			563.741	908.048			1464.3	899.326
		2007.11	847.564			550.837	905.353			960.078	898.743
		1557.11	843.078			311.242	903.193			945.579	898.468
		2006.98	840.966			2168.77	899.769			1144.14	898.314
		1161.77	840.643			1604.02	899.06			767.49	898.218
		704.546	840.469			807.195	896.072			1343.81	896.288
		1501.36	838.861			1085.78	893.55			1812.2	895.642
		352.451	837.059			1362.25	892.896			758.113	895.105
		1017.33	836.454			784.949	892.183			976.135	892.258
		1628.35	835.84			800.289	891.962			863.832	892.116
		1227.79	835.41			1325.18	889.734			441.411	891.648
		659.417	833.552			1033.39	886.873			1017.07	890.982
		583.809	833.208			708.018	884.682			893.711	890.294
		1272.68	829.732			1422.64	884.371			665.741	890.281
		359.196	829.537			1318.12	880.459			1140.05	889.073
		794.314	828.593			1192.69	880.306			1183.55	886.465
		1162.53	828.475			1224.38	879.004			1537.01	884.558
		557.523	828.431			1480.13	878.65			1342.17	884.496
		1124.04	826.725			1215.16	878.528			1730.34	884.264
		1710.71	824			1675.28	877.739			1307.01	883.444
		1405.02	823.351			388.157	877.49			1133.97	882.659
		1515.63	823.264			1215.48	877.404			1406.02	882.519
		610.926	821.621			1024.44	877.257			749.377	882.272
		1756.65	821.582			775.154	875.396			1001.38	882.137
		397.206	820.057			586.091	869.954			1244.4	879.719
		1065.35	819.769			1457.5	867.227			1105.98	878.984
		216.335	819.693			1221.12	862.605			1209.74	877.082
		1300.02	816.869			958.444	861.602			1935	872.499
		1087.32	816.079			1780.52	861.358			728.893	872.13
		689.524	815.087			809.618	859.515			818.696	871.303
		1483.56	810.229			1245.57	858.587			490.422	868.547
		467.589	809.424			570.085	855.404			550.982	868.427
		852.914	808.032			1927.88	851.588			576.702	867.394
		998.662	804.255			1207.32	851.469			1285.06	866.813
		676.296	804.122			1076.98	850.771			913.855	866.188
		927.934	803.788			866.002	850.219			672.888	864.012
		1674.99	801.032			653.645	849.727			1862.41	863.322
		1257.1	799.649			1564.23	846.142			1000.2	861.556
		1208.3	799.235			1553.46	845.611			1112.01	860.973
		907.418	799.179			530.16	845.173			830.592	860.742
		1051.9	798.823			981.027	844.392			284.899	859.998
		324.436	797.804			1720.51	843.84			368.086	859.896
		841.426	797.721			1169.1	842.164			1250.61	858.812
		753.545	793.212			1296.95	842.116			536.026	858.338
		828.621	792.162			1568.97	841.956			1161.61	857.629
		985.905	790.902			1280.42	841.562			1177.83	856.953
		834.061	789.276			463.842	840.334			1063.04	856.877
		778.912	787.583			673.136	840.01			738.405	855.132
		1498.45	787.439			1346.91	839.853			1204.21	854.214
		669.93	785.954			1421.19	839.445			642.039	853.934
		1297.44	784.682			1646.81	839.339			469.624	850.414
		1163.58	784.588			1688.38	838.65			1863.59	847.088
		1331.09	784.296			1407.79	838.371			1119.49	846.621
		580.504	784.262			353.386	836.844			1286.74	844.468
		1017.11	783.805			747.436	836.47			1213.21	841.762
		989.416	781.108			605.64	836.233			872.85	841.062
		1504	780.165			967.154	833.724			1268.5	840.269
		937.907	779.507			504.742	832.823			1285.29	840.261
		1282.66	779.308			653.251	831.234			613.837	839.769
		381.069	778.871			953.35	830.857			1223.73	837.474
		486.493	778.639			481.649	830.127			936.865	836.859
		927.139	778.412			920.04	828.305			1388.55	835.713
		1753.64	777.354			1580.72	828.18			843.22	835.225
		573.414	774.59			904.283	826.852			1300.73	830.922
		527.601	771.856			1303.04	826.685			1580.08	830.794
		799.277	771.144			488.676	824.951			931.882	829.561
		500.884	768.775			866.549	823.219			1431.4	829.409
		908.03	767.387			1158.16	823.21			1836.28	828.935
		995.631	767.281			613.427	823.059			1496.04	828.2
		656.934	766.308			1893.42	823.023			594.486	827.602
		1102.38	766.199			1012.26	819.201			1720.36	826.93
		533.814	764.519			1054.99	818.339			1041.45	826.193
		519.472	763.941			1116.43	815.746			1193.19	826.064
		431.716	761.206			1758.72	815.158			1984.06	825.502
		428.881	760.965			468.286	815.019			419.56	825.035
		1051.98	757.36			1238.4	814.743			615.313	824.534
		2273.9	755.627			1649.31	813.939			398.202	822.964
		1225.87	755.304			2087.21	812.469			1400.7	822.281
		1437.28	753.476			1732.93	811.698			490.414	822.236
		1016.67	753.299			728.246	809.307			973.615	820.056
		582.401	752.145			1054.17	805.822			389.946	818.123
		1181.01	752.05			1154.73	805.785			1292.24	818.024
		1734.98	750.848			1885.85	805.5			901.134	817.846
		883.568	750.446			1224.43	804.92			430.74	815.992
		870.049	750.062			1305.82	803.747			1459.31	815.587
		2320.59	748.293			466.765	803.522			940.491	814.427
		705.361	743.008			1332.7	800.751			1452.88	814.392
		1682.91	742.487			908.07	799.362			1319.43	814.324
		1904.22	742.237			1346.91	798.788			1217.92	814.022
		886.167	741.556			1254.72	797.973			1093.83	813.828
		1216.59	741.523			670.503	796.537			1338.13	812.865
		710.237	740.93			1688.91	793.777			1310.58	812.219
		800.414	740.589			1265.77	790.689			1084.97	811.987
		1214.62	739.521			1252.67	790.553			1617.53	810.086
		1197.8	737.845			357.718	790.546			1094.91	809.114
		1057.79	735.206			492.572	790.409			875.275	807.43
		1058.54	735.156			1539.2	789.856			810.638	807.053
		645.871	732.555			1103.09	789.537			1117.34	807.021
		1297.29	732.536			827.502	789.46			873.109	805.897
		1651.14	730.342			1241.93	785.458			813.239	805.648
		473.097	729.244			824.308	785.433			509.122	804.1
		1562.13	729.07			1063.75	783.297			1078.46	804.081
		1566.8	727.694			1023.91	783.143			1349.44	803.02
		752.405	724.646			238.489	781.971			580.433	802.639
		97.9478	724.279			1806.44	781.23			1118.85	802.582
		1503.15	724.02			947.339	779.199			1472.34	801.932
		1106.94	723.923			830.379	778.082			920.49	801.842
		1540.37	722.167			569.35	777.493			1453.63	801.429
		1450.97	721.664			1535.62	776.746			1183.99	800.605
		1796.37	721.099			636.805	776.507			520.479	800.024
		1199.63	721.098			295.336	772.824			503.224	799.596
		1740.65	719.248			963.725	772.522			662.182	798.817
		977.636	719.03			1452.08	771.792			841.979	798.599
		252.252	717.665			398.81	770.601			1494.86	798.147
		1350.21	717.323			886.659	768.704			933.274	797.568
		594.503	715.652			1239.23	767.579			1114.78	797.122
		359.868	714.593			696.674	765.979			1028.14	796.392
		215.951	714.307			1180.84	763.183			888.408	796.169
		1089.7	714.157			450.538	762.949			726.216	795.379
		145.557	714.1			920.811	762.55			1147.85	795.279
		381.193	713.829			924.555	762.548			998.196	793.78
		1106.15	710.98			348.373	761.243			1084.65	793.597
		1124.82	709.005			1487.99	759.49			1163.51	792.833
		1269.95	707.996			1389.89	758.885			803.914	792.375
		495	707.896			1230.67	758.641			425.775	792.097
		456.017	707.46			397.545	756.871			945.831	791.332
		987.051	706.325			1669.53	756.388			1287.75	790.322
		1714.73	705.938			1896.71	755.981			1525.5	790.161
		912.731	705.669			1060.5	755.231			554.049	789.764
		181.499	705.107			798.05	754.701			859.073	789.744
		624.868	704.961			2238.5	754.61			482.164	789.726
		614.545	704.409			398.308	753.656			1995.44	789.596
		361.098	704.01			457.035	750.748			1528.84	788.017
		2012.88	703.963			687.759	750.637			978.787	787.693
		1581.22	703.943			258.227	750.62			883.111	787.551
		1349.19	703.556			1680.38	747.054			1666.03	787.333
		720.921	703.497			791.203	743.097			1011.37	786.986
		1834.11	702.971			439.472	742.558			955.438	786.468
		663.916	701.772			1221.87	742.146			688.845	785.657
		1227	701.269			408.787	741.148			2080.78	784.567
		1269.17	700.983			693.238	740.651			686.583	784.307
		484.704	700.616			467.244	738.407			376.01	783.328
		1051.56	699.937			970.239	738.286			1118.65	783.103
		1208.44	699.863			1478.61	738.014			1042.69	782.809
		1270.72	699.737			387.424	735.99			1365.98	782.091
		1512.53	698.765			1416.75	735.95			1448.94	781.981
		868.836	698.46			1345.89	735.37			532.394	780.863
		828.455	697.098			1544.61	735.152			1491.53	780.639
		678.029	696.351			1140.82	733.745			1136.9	779.77
		214.082	695.454			366.727	732.009			1548.88	779.488
		807.235	692.752			1818.16	730.472			1547.95	777.108
		1348.53	692.393			1256.18	730.431			731.72	776.888
		1243.13	692.189			1464.8	729.896			519.046	775.88
		1280.97	690.648			1646.94	729.276			1051.87	775.351
		421.781	689.333			501.256	727.826			1255.34	774.335
		588.769	688.312			1710.61	725.861			522.849	773.387
		1324.37	685.75			2004.37	725.836			1480.04	772.973
		694.671	685.502			480.015	725.463			736.772	772.902
		2130.41	685.474			492.597	724.055			900.574	772.7
		1013.9	684.457			476.283	723.237			1004.33	772.003
		998.687	683.144			770.056	722.583			1213.12	770.998
		539.452	682.919			1519.48	721.872			383.479	768.169
		1478.41	681.757			1091.23	721.198			392.3	767.79
		1349.81	681.237			1086.58	721.144			904.787	767.225
		1765.85	680.661			1442.43	720.253			1250	766.468
		511.72	680.442			1057.65	718.86			1470.88	766.404
		1506.38	679.494			372.214	718.453			721.896	766.364
		1370.27	679.166			1183.14	718.452			1212.36	765.16
		1416.92	678.493			658.365	718.284			1006.38	764.02
		946.071	677.985			423.355	718.103			1169.58	763.901
		520.24	677.71			1577.12	717.933			1308.33	763.869
		649.914	676.892			955.274	717.378			1345.73	763.466
		823.708	676.211			838.186	716.963			1515.5	762.171
		347.055	675.914			932.865	715.384			1785.39	761.023
		1797.09	675.527			968.72	714.776			866.97	760.938
		628.827	674.328			756.492	713.872			1035.39	760.814
		1115.44	673.314			605.135	713.058			1417.43	760.382
		1020.33	671.473			1595.25	711.782			1468.24	760.013
		1773.4	670.724			1816.02	709.458			591.315	759.504
		1220.84	670.133			1647.34	709.31			737.321	758.685
		1410.3	668.46			665.358	707.303			1347.91	758.543
		575.292	668.372			1053.73	706.574			856.809	758.23
		335.585	668.322			892.301	706.177			658.193	757.538
		649.019	666.72			704.662	705.732			1265.25	757.523
		520.196	664.568			1038.79	704.352			1468.87	756.259
		1307.66	660.59			712.059	702.575			1397.57	755.688
		303.423	660.252			713.876	702.467			1499.9	755.459
		406.191	660.1			289.431	702.429			1367.69	755.097
		829.715	659.93			357.722	701.75			1596.44	753.842
		535.894	659.919			1000.35	701.527			1323.75	753.251
		1012.71	659.578			318.531	701.119			1549.06	752.042
		1336.62	656.758			967.057	698.165			1230.63	751.748
		1249.5	654.721			503.566	698.121			1366.33	751.032
		528.442	654.621			1169.08	697.427			1227.69	750.89
		806.861	654.094			1298.24	695.162			804.877	750.148
		391.027	653.452			1446.87	694.889			410.603	749.893
		1012.6	653.444			1049.5	694.06			1295.4	749.834
		375.94	653.294			704.063	693.513			1397.3	749.776
		1437.85	651.017			567.198	692.669			972.25	749.522
		410.342	650.855			1774.29	691.542			852.321	748.842
		569.709	649.383			727.938	690.931			1644.68	746.787
		837.697	648.302			1829.6	690.449			535.345	746.725
		1134.49	647.817			1543.97	690.314			1251.72	746.718
		461.353	646.779			1791.29	690.021			1051.64	746.361
		1081.15	646.438			905.973	689.84			626.397	746.255
		1486.37	646.158			974.94	689.603			678.257	744.531
		642.964	645.116			990.915	689.502			288.519	744.471
		1553.61	644.034			957.068	688.079			611.093	743.587
		869.29	643.953			959.367	687.212			1386.27	743.241
		965.925	643.742			1259.79	687.005			999.16	742.959
		479.225	643.73			1299.16	686.7			954.875	742.387
		1149.59	642.491			832.861	685.964			1245.68	742.375
		749.762	640.335			1374.5	685.674			1078.62	742.284
		784.473	639.573			886.888	683.717			917.686	741.757
		1133.86	638.75			1578.19	682.221			771.644	739.497
		865.293	638.719			393.797	681.621			961.481	739.329
		365.366	638.142			1136.03	681.225			1291.91	739.263
		1152.65	637.231			1121.68	680.327			771.519	738.918
		959.779	637.068			1557.54	679.828			569.49	738.167
		1133.25	636.218			371.596	679.388			713.518	737.734
		1113.56	636.103			369.004	677.758			174.56	736.418
		785.354	636.029			1080.18	677.399			1757.53	735.681
		1109.56	635.625			611.923	676.79			1052.08	735.326
		438.957	635.298			1718.33	675.753			1386.52	735.263
		519.141	634.344			384.739	675.561			1470.12	733.766
		1129.03	633.158			1498.21	675.474			1231.46	733.354
		1420.72	632.757			1341.87	675.135			1317.69	733.124
		669.199	632.234			743.769	674.191			589.412	732.951
		771.844	631.942			1510.78	673.828			1311.09	730.191
		986.257	630.226			1302.65	671.715			629.421	729.685
		589.305	629.824			1104.23	671.349			1167.27	729.58
		601.537	625.835			905.293	669.744			1570.99	729.539
		1297.82	625.781			1544.82	669.552			1086.51	729.157
		1095.28	625.232			1885.25	669.329			539.538	729.067
		1034.56	625.142			1328.05	669.268			976.474	728.857
		1124.96	624.486			1299.34	668.931			666.709	727.946
		1334.62	624.369			1101.23	668.881			459.579	727.62
		1725.4	623.049			454.003	667.155			538.433	727.419
		2089.29	622.961			946.785	666.611			1401.38	726.981
		1480.77	622.184			1509.88	665.077			887.463	726.403
		1269.68	621.995			1520.31	663.966			1154.24	726.086
		1512.36	621.342			626.35	663.656			1057.98	725.901
		298.507	621.239			497.139	662.729			880.31	725.582
		685.033	620.672			902.916	662.231			1349.73	724.433
		1262.88	620.507			455.005	661.964			1606.62	724.348
		827.921	620.385			590.6	660.93			1495.8	722.257
		481.905	619.205			1294.04	658.851			643.773	721.79
		970.821	618.007			824.346	658.789			1559.08	721.215
		843.023	617.039			1024.74	658.707			800.462	721.172
		1070.52	616.492			648.83	656.516			1128.55	721.103
		1138.01	616.202			1515.82	655.657			1026.05	720.661
		451.183	614.732			1275.35	655.192			1543.31	720.481
		419.76	614.549			1249.32	654.968			875.476	720.338
		1453.48	614.1			1111.15	654.638			646.495	717.82
		486.916	613.789			1229.65	653.669			1857.79	716.477
		342.83	612.786			1175.81	653.629			1026.81	715.813
		945.966	611.749			1189.59	652.213			1065.42	715.779
		1017.62	611.527			980.195	652.088			419.637	715.651
		1603.5	610.788			633.769	651.247			672.956	715.305
		1486.62	610.638			894.625	650.844			636.482	715.245
		664.848	610.147			1895.14	650.327			415.408	712.98
		968.789	609.782			993.752	648.728			919.003	712.706
		367.714	609.276			682.753	648.662			685.866	712.553
		849.272	608.325			978.362	647.874			494.953	712.546
		1206.36	607.862			1175.36	647.007			640.955	711.728
		1310.91	607.461			1500.46	646.713			916.897	711.081
		938.927	607.214			750.825	646.327			695.586	710.53
		1097.93	604.29			380.346	645.209			1682.01	710.001
		662.973	603.88			1574.15	643.365			464.403	709.299
		567.92	603.76			1647.19	642.976			830.343	709.03
		673.319	602.778			1547.86	640.946			422.294	708.917
		1057.84	600.682			688.931	640.636			1510.22	708.118
		1616.02	600.223			767.311	640.383			795.186	707.897
		1371.74	599.506			528.476	639.573			1369.66	707.554
		1331.27	599.168			1865.9	639.409			722.852	707.313
		1488.18	598.68			1232.32	637.075			963.869	707.295
		1275.05	598.382			1083.4	635.281			997.548	707.248
		418.374	597.673			1476.35	632.958			1723.03	707.041
		959.756	596.846			1716.02	632.085			956.832	706.844
		1800.69	595.899			403.005	631.993			686.94	706.638
		2087.15	594.504			1231.79	630.204			541.758	704.559
		1663.85	593.602			1218.54	630.091			1471.89	704.094
		762.303	592.44			776.508	629.087			1697.83	703.753
		1228.69	591.657			364.808	628.619			1043.15	703.381
		936.863	591.454			309.821	627.728			1460.78	703.32
		1845.01	590.806			664.458	627.724			696.217	702.379
		495.664	590.681			599.234	627.648			1089.32	702.315
		515.157	589.884			1170.97	627.259			1558.04	701.032
		990.47	589.478			951.987	626.905			1383.17	700.283
		972.476	588.643			650.593	626.576			1246.96	700.274
		1486.8	588.481			978.943	625.853			628.567	699.78
		1016.72	588.426			1308.89	624.168			1243.25	699.747
		1159.64	588.315			352.627	623.894			1144.85	699.465
		1655.08	588.11			859.737	623.404			1091.22	698.326
		340.553	587.626			1688.76	622.52			1212.83	697.691
		906.699	587.041			946.937	622.116			1217.41	697.161
		1393.07	586.282			1119.92	621.693			901.411	696.994
		391.204	584.644			1561.44	621.556			1479.55	696.565
		676.108	583.862			840.13	621.373			969.889	696.559
		670.714	583.48			643.817	621.189			1141.73	696.231
		850.12	582.769			1349.2	619.875			1358.2	696.033
		661.041	582.135			1066.23	618.868			1120.75	694.997
		243.793	581.734			1174.58	618.366			205.643	694.784
		647.459	580.717			1081.75	618.199			537.502	694.778
		1172.56	580.691			989.173	618.072			1384.65	694.599
		1280.32	580.638			1093.89	618.003			1514.94	693.696
		1963.96	578.863			1201.93	615.925			862.215	693.439
		1421.55	578.195			497.492	614.582			1022.92	692.798
		571.413	577.665			585.259	614.568			1535.71	692.489
		1282.03	576.298			1048.1	613.901			640.191	692.188
		1262.84	575.34			1025.23	613.6			1857.89	691.357
		749.158	575.065			356.106	612.997			284.461	690.868
		860.359	573.906			1875.67	612.471			701.804	688.62
		1216.88	573.697			552.806	611.888			1145.41	688.373
		652.496	572.889			502.261	611.106			964.767	686.96
		1312.75	572.434			831.221	610.93			1297.34	686.898
		322.023	572.137			1485.17	609.441			1148.79	686.882
		1056.22	570.765			380.748	609.328			583.766	684.802
		926.642	570.47			1518.81	608.974			1870.58	684.61
		1873.59	569.68			437.779	608.827			1164.06	684.262
		1151.94	568.512			1950.74	608.503			1623.02	684.161
		922.346	568.463			1161.38	604.307			879.614	683.832
		501.716	567.95			484.985	603.958			979.249	683.079
		1127.77	567.83			231.661	603.41			847.545	682.867
		1665.38	567.721			1255.65	602.483			1241.73	681.932
		814.301	567.53			1310.64	601.784			1001.03	681.814
		1407.84	566.395			515.967	601.7			1172.46	681.561
		1326.14	566.346			996.53	600.931			1127.31	681.348
		671.071	565.247			1045.26	600.663			1091.55	681.073
		1116.8	564.755			2123.14	600.081			1278.54	680.403
		1135.89	564.52			848.385	599.469			709.053	679.574
		1173.43	563.614			894.877	599.249			944.69	678.943
		1499.58	563.368			610.412	596.933			1399.94	678.921
		1556.66	563.204			527.441	596.342			583.329	678.908
		1663.45	563.191			1979.1	596.025			656.349	678.753
		568.962	563.062			1152.21	594.819			964.386	676.5
		797.733	563.019			1114.26	594.756			951.619	676.358
		1804.3	562.402			1135	594.578			1147.07	675.969
		173.598	561.045			779.749	594.551			554.393	675.955
		499.204	560.636			1546.99	593.361			665.065	675.69
		739.704	559.844			1292.08	593.123			714.748	675.688
		1407.61	559.745			426.895	592.558			354.696	675.521
		607.868	559.729			1137.09	592.484			1240.61	675.487
		583.605	559.259			1515.46	592.324			1177.76	674.985
		754.61	559.256			732.089	591.866			1034.04	674.897
		369.1	558.938			927.636	591.536			1675.88	674.363
		722.508	558.87			861.243	591.411			1200	673.936
		238.31	558.814			377.732	590.4			932.074	673.863
		1626.66	558.322			1493.5	590.075			1090.18	673.668
		930.494	557.754			801.233	589.847			806.05	673.151
		1399.75	557.606			701.628	589.72			1083.55	673.072
		990.456	557.035			688.662	589.341			759.158	672.862
		346.762	556.895			738.484	589.097			1186.04	672.186
		1207.04	555.724			1569.53	588.793			547.422	671.937
		409.652	555.633			664.119	588.609			714.941	670.352
		1287.93	555.513			1380.61	587.254			955.441	669.13
		742.993	554.522			310.258	587.012			1799.57	668.755
		1594.99	554.299			966.479	586.755			1180.52	668.716
		1610.48	553.639			1375.59	586.345			328.117	668.507
		1327.04	553.232			580.25	585.424			1453.56	668.306
		1093.93	551.358			1492.72	585.207			1150.81	666.946
		680.976	550.646			991.616	584.627			1099.65	666.746
		504.021	550.517			418.564	584.106			1624.26	665.727
		1276.97	550.301			73.4679	583.007			1693.9	665.324
		1279.85	549.426			924.042	582.573			1116.19	665.12
		1071.91	548.906			986.111	582.385			560.584	664.64
		520.161	548.153			936.89	582.277			198.092	663.945
		704.444	548.004			988.684	582.156			1154.73	663.654
		1393.33	547.633			1270.24	581.95			950.628	662.808
		1708.36	547.567			411.845	581.635			1149.18	662.498
		543.689	547.413			841.63	581.604			764.434	661.757
		427.267	547.129			899.016	580.692			1059.19	661.576
		1477.8	547.052			553.901	580.414			644.89	661.226
		579.821	546.071			860.363	579.08			240.992	660.198
		616.071	544.872			1200.14	579.052			603.278	659.533
		1336.29	542.921			1249.01	577.5			782.669	659.093
		1024.64	542.834			265.416	576.871			683.638	658.924
		769.036	542.702			430.35	576.583			236.312	658.892
		281.366	541.916			1187.58	576.125			455.957	658.219
		494.144	541.469			715.622	575.253			1301.3	657.772
		442.907	540.191			1714.58	573.339			744.883	656.544
		572.684	539.182			1726.38	573.282			741.068	655.683
		742.703	538.561			981.714	572.966			1009.57	655.385
		421.146	536.846			1023.87	572.332			1159.96	655.132
		772.947	536.516			405.602	572.328			351.556	654.97
		570.198	536.297			1726.16	572.284			1007.72	654.503
		1065.38	536.289			383.898	571.527			1373.4	653.544
		956.578	535.355			1847.38	571.488			1428.58	653.479
		652.801	532.263			1228.11	571.425			1240.05	652.594
		540.494	531.252			714.745	570.253			1188.91	652.54
		1011.64	531.161			218.615	569.744			476.103	652.156
		761.48	531.019			1371.38	568.827			547.718	651.464
		618.436	530.505			1183.95	568.792			921.1	651.404
		1059.88	530.031			1948.16	568.46			426.084	651.356
		739.453	529.9			1293.61	568.163			1368.46	650.962
		258.33	529.558			956.957	567.606			1232.91	650.643
		948.462	528.981			933.33	567.105			787.403	649.242
		492.966	528.678			278.45	566.097			1703.34	649.178
		852.812	528.571			750.029	564.732			1692.87	648.576
		475.88	526.909			1614.53	564.26			468.062	648.377
		232.075	526.557			674.039	563.806			1752.66	648.308
		925.452	525.823			667.708	562.585			442.399	648.276
		1251.78	525.559			838.543	562.508			937.767	646.804
		311.584	525.32			1674.46	562.456			1207.14	646.303
		257.788	524.95			1883.84	561.934			414.971	645.605
		664.989	523.283			1688.72	559.963			2001.6	645.005
		1147.96	523.118			1272.32	559.847			1092.78	644.001
		455.625	522.577			1328.2	559.846			637.596	643.128
		1328.15	520.872			1595.54	559.016			1428.18	642.651
		500.39	519.958			1805.37	559.001			575.649	642.55
		884.814	519.949			1239.05	558.937			392.719	642.191
		563.767	519.927			1397.75	558.383			435.284	641.395
		683.297	519.555			1311.14	555.811			998.562	641.328
		1387.65	519.011			1059.64	555.5			1229.29	641.299
		1039.83	518.936			275.663	555.234			1304.32	639.737
		1234.27	518.634			1270.49	554.479			738.589	639.598
		735.607	518.133			1176.79	553.704			415.458	638.512
		437.468	517.662			664.789	552.87			516.815	638.314
		1022.95	517.484			349.162	552.359			1160.97	637.443
		1246.85	516.337			1116.83	551.622			374.099	635.87
		863.97	515.308			956.379	550.297			1185.06	635.529
		908.402	514.977			998.317	549.997			1160.2	635.348
		264.684	514.574			458.523	549.647			499.249	635.289
		929.865	513.925			1175.37	549.086			1018.78	635.22
		1139.27	513.606			1360.63	547.684			702.465	634.75
		1040.12	513.598			1585.31	546.613			738.744	633.957
		975.189	510.689			1026.5	546.37			751.179	633.42
		738.621	510.37			451.805	543.892			1255.75	633.088
		276.128	509.912			1582.95	541.811			676.976	630.945
		1381.21	509.854			484.05	541.715			382.299	630.688
		689.098	509.703			1476.94	541.041			1233.05	629.906
		704.902	509.413			797.997	540.979			731.36	629.893
		340.795	509.234			310.018	540.917			748.167	629.805
		921.502	508.912			798.399	540.841			919.72	629.628
		1661.08	508.133			1325.11	540.52			407.245	629.626
		1019.35	508.044			886.355	540.504			801.316	629.221
		432.941	507.465			725.39	540.36			658.591	629.111
		455.444	507.01			1741.49	540.261			1249.66	628.375
		1932.82	506.211			885.783	539.659			1382.23	628.252
		1053.97	505.453			892.203	539.341			831.431	627.924
		1491.82	505.058			443.083	539.107			764.896	627.871
		687.899	504.958			573.561	539			1259.81	627.682
		1342.44	504.618			306.312	538.831			1535.59	626.246
		843.661	504.433			741.234	538.603			367.448	625.584
		864.352	504.197			557.656	538.361			1436.84	624.957
		335.727	504.173			253.636	538.317			1188.68	624.327
		465.323	503.361			403.663	536.559			1292.25	623.049
		647.146	502.863			1069.85	536.068			1624.82	623.007
		1225.89	502.845			1308.92	535.781			496.575	621.856
		1611.11	502.605			508.876	535.411			874.654	621.537
		999.805	502.457			767.116	534.471			1255.68	621.503
		1031.76	502.227			1292.18	534.362			1339.86	621.489
		1039.32	501.419			1369.69	533.875			958.975	621.417
		1054.89	501.39			1058.85	533.501			538.197	621.047
		687.067	501.205			912.111	533.377			1129.4	621.023
		1027.97	500.219			624.463	533.152			567.489	620.783
		1283.41	499.861			1156.03	532.834			1296.71	620.741
		964.587	499.59			1323.79	532.557			887.445	620.12
		1270.81	499.368			242.986	532.488			694.64	619.495
		521.322	499.108			1091.69	531.514			686.487	619.437
		1635.27	498.702			400.827	531.354			876.118	619.401
		624.749	498.687			1484.52	530.126			831.755	619.298
		340.74	498.607			828.29	529.556			1170.59	618.768
		1555.89	495.924			1214.01	529.486			468.322	618.737
		1034.05	495.687			845.056	529.159			756.307	617.89
		409.655	494.81			291.123	528.988			1174.22	617.88
		376.59	494.465			935.717	528.956			1252.33	617.552
		902.83	494.384			361.785	528.717			1263.07	617.28
		337.454	494.291			1044.88	528.473			1102.97	616.739
		1066.74	493.49			1085.55	527.965			667.019	616.38
		1160.97	492.774			944.052	527.527			414.549	616.373
		359.104	492.438			449.564	527.1			669.599	616.267
		1351.37	492.431			1250.11	526.432			619.375	616.107
		917.47	492.345			1214.73	526.336			467.482	616.068
		674.987	492.314			1494.27	526.271			820.661	615.265
		369.772	491.413			1585.9	526.194			187.82	614.961
		1453.5	490.419			510.602	526.003			1346.39	614.857
		454.942	490.379			1354.38	525.992			1725.64	614.378
		691.755	490.334			1113.15	524.857			714.736	613.713
		372.308	490.21			455.573	524.77			493.226	613.693
		602.787	489.902			420.325	524.576			1556.48	613.662
		303.561	489.616			983.617	524.277			931.245	613.657
		1055.05	488.517			283.322	522.095			1028.24	613.591
		917.485	488.5			1262.76	522.089			799.536	613.352
		1622.17	488.25			831.889	522.081			2242.58	613.017
		515.777	488.243			723.191	520.649			807.419	612.178
		679.101	488.123			741.64	519.618			1115.3	612.154
		880.78	488.015			867.03	519.107			1999.28	612.064
		891.11	487.065			941.165	518.953			437.734	611.605
		1553.15	486.967			868.639	518.834			1772.25	611.603
		1311.01	486.24			561.12	516.729			586.098	610.266
		545.859	485.38			489.729	516.196			1710.6	610.22
		1763.54	485.307			632.762	516.189			394.896	610.147
		1857.47	485.055			943.692	515.352			374.948	609
		656.955	485			391.648	515.22			1674.05	608.884
		746.277	484.784			848.096	515.035			1208.73	608.829
		514.594	484.407			1108.56	514.765			734.318	608.712
		849.236	484.251			472.144	513.951			1705.64	608.702
		1525	483.983			1705.08	513.778			1545.1	608.555
		1654.42	483.683			1022.69	513.758			996.718	607.916
		1781.35	483.264			552.488	513.182			711.922	607.899
		1432.76	483.188			1390.84	512.819			1143.28	607.125
		165.981	483.01			429.435	512.558			1388.73	606.817
		1556.91	482.356			208.785	511.872			668.322	606.122
		1345.55	482.322			503.667	510.823			519.043	606.084
		2011.23	481.715			1574.56	510.638			1211.49	605.497
		979.829	481.637			853.18	510.489			1681.77	605.47
		454.341	481.518			1090.2	509.932			1194.44	604.559
		920.395	481.423			474.032	509.716			522.396	604.532
		1036.52	481.372			844.049	508.983			589.105	603.705
		550.603	481.343			1109.66	508.91			1114.36	602.948
		619.468	481.275			112.38	508.042			532.878	602.848
		1279.55	480.807			874.737	507.709			639.567	602.713
		343.998	480.583			223.93	507.493			806.344	602.301
		480.461	480.393			870.303	507.217			1056.79	602.023
		284.172	480.246			933.927	505.622			999.212	601.561
		700.137	479.012			1256.85	505.416			1455.54	601.176
		1487.84	478.912			523.363	505.262			1503.73	600.882
		737.223	478.634			362.711	504.678			1003.56	600.656
		647.769	478.604			1208.4	504.438			663.907	600.499
		1017.38	478.43			958.1	503.424			1375.06	600.46
		302.024	478.379			652.359	503.416			425.769	600.436
		949.644	478.231			1408.05	502.865			466.438	600.228
		141.517	477.621			971.758	502.697			457.004	599.956
		1125.77	477.276			1290.03	502.535			1259.13	599.865
		687.589	476.008			1229.25	502.098			710.962	599.412
		2024.81	475.995			1264.55	500.061			1672.12	599.349
		165.081	475.584			1397.82	498.713			1208.81	598.546
		418.386	475.361			1218.09	498.528			722.465	598.522
		576.46	474.571			1132.04	498.421			760.745	598.419
		508.876	473.543			1334.41	498.247			937.505	597.926
		712.212	472.757			430.267	497.507			475.811	597.844
		432.5	472.482			368.747	496.809			887.963	596.702
		1727.5	471.001			1285.13	496.739			330.308	596.519
		929.648	470.947			1082.55	496.537			1400.78	596.36
		780.498	470.186			776.437	496.426			907.727	596.178
		897.712	470.062			237.98	496.304			1638.59	596.023
		1054.71	470.043			1549.37	495.858			1704.18	596.003
		1126.17	468.688			997.048	495.695			753.785	595.375
		798.081	468.613			1403.73	495.144			1518.75	595.002
		445.892	468.242			1652.24	494.881			1120.04	594.845
		433.029	467.725			1521.63	494.77			1063.49	594.264
		505.755	467.682			420.019	494.147			343.513	593.869
		1057.61	467.253			1335.88	493.872			1176.72	593.363
		907.544	467.092			1334.51	492.916			1569.55	592.338
		1590.03	466.689			434.475	492.49			789.761	592.114
		1232.31	466.482			314.315	492.315			524.293	592.037
		740.714	466.402			1375.2	491.54			485.203	591.65
		1200.15	466.274			814.483	491.44			831.431	591.443
		564.638	465.892			1600.65	491.226			1442.34	590.641
		1221.64	465.813			1280.74	490.892			863.26	590.554
		474.478	464.682			417.126	490.63			1195.45	590.179
		1322.6	464.342			876.419	490.49			543.282	589.921
		1724.01	463.699			783.296	489.39			1462.49	589.914
		1354.73	463.627			1107.72	488.95			1152.75	589.456
		1444.85	462.931			354.034	488.88			1058.98	589.401
		393.118	462.262			350.68	488.103			952.373	588.83
		605.361	462.118			893.257	487.777			1147.9	588.447
		710.315	462.07			1699.24	487.42			878.831	588.309
		782.84	461.887			1691.08	486.822			1259.1	587.954
		271.503	461.84			1040.24	485.876			780.019	587.868
		715.118	461.754			438.303	485.699			669.594	587.862
		1579.11	461.617			567.361	485.325			938.068	587.567
		1359.8	461.459			1062.6	483.563			1310.07	587.429
		804.229	461.128			1553.75	483.364			754.581	586.45
		1101.64	460.655			483.946	482.621			707.769	586.429
		1462.8	460.465			502.673	482.333			1570.5	586.382
		592.743	460.205			476.737	482.285			174.931	586.342
		1447.47	459.976			486.38	482.222			598.102	586.235
		1516.93	458.922			541.84	482			1635.59	585.63
		1348.69	458.414			1573.82	481.865			1582	585.001
		1112.79	458.264			559.988	481.67			956.398	584.841
		207.063	457.935			1106.54	481.614			1636.58	584.332
		258.479	457.73			1718.13	481.329			503.675	584.328
		1146.81	456.73			1117.5	481.125			1270.25	583.746
		938.01	456.413			1320.15	481.05			498.754	583.661
		703.454	456.315			1141.72	480.954			666.571	583.463
		377.257	456.046			199.084	480.457			1708.09	582.957
		1616.86	454.883			368.366	478.749			1280.39	582.491
		1108.72	454.691			1360.46	478.485			889.384	582.306
		1397.33	454.29			1225.62	478.346			770.741	582.223
		323.854	454.122			1057.92	478.257			649	582.128
		1356.23	453.216			1000.38	478.196			1008.01	582.095
		705.174	452.985			1284.66	477.461			457.502	581.57
		1440.56	452.955			265.142	475.477			668.703	581.404
		742.649	452.212			704.039	475.219			671.586	581.333
		1112.68	451.592			671.976	474.234			1317.88	581.298
		321.851	451.029			1049.63	473.796			1589.49	581.188
		873.312	450.756			295.513	473.76			1224.88	581.046
		683.009	450.72			252.808	473.713			808.04	581.029
		205.789	450.386			1107.26	473.517			900.802	581.021
		163.384	450.218			1011.1	473.494			1064.61	580.57
		518.897	449.973			674.008	470.644			970.949	580.365
		1240.22	449.816			955.381	470.359			1353.74	580.129
		703.41	449.518			614.273	470.315			383.55	580.08
		280.008	449.362			1827.28	470.2			791.656	579.821
		382.38	448.611			1757.4	468.744			424.993	579.407
		1610.05	448.531			356.008	468.313			372.349	578.828
		907.638	448.235			1444.57	466.168			781.941	578.726
		620.251	448.134			944.684	464.802			965.225	578.605
		1194.4	446.865			507.896	464.762			1099.65	578.243
		495.251	446.857			736.627	464.736			554.952	577.422
		539.619	446.499			1300.11	464.432			1573.65	576.935
		369.233	446.141			1018.78	464.115			735.407	576.489
		1095.44	445.605			1093.45	463.881			784.203	576.253
		668.453	445.199			1433.14	463.41			1392.67	575.685
		1302.49	445.153			484.5	463.336			638.36	575.537
		888.062	445.111			1282.5	462.843			441.403	575.393
		925.611	445.031			1895.84	462.622			521.863	575.346
		629.22	444.602			352.071	462.166			504.593	575.27
		1350.74	444.526			1734.84	461.786			431.008	575.113
		491.803	444.307			1377.35	461.61			1005.17	574.53
		916.831	443.861			523.347	461.367			2187.89	574.482
		630.882	443.169			590.351	460.628			196.218	574.105
		410.93	442.638			457.646	459.82			691.313	572.95
		580.267	442.509			1347.76	459.49			1166.94	572.728
		936.132	442.2			699.209	459.023			1185.02	572.434
		1224.16	442.062			1211.23	458.063			562.386	572.167
		1284.53	441.956			993.527	457.439			1077.12	572.09
		876.596	441.759			725.808	457.09			1058.16	571.895
		586.114	441.219			1225.24	456.677			586.483	571.677
		395.678	440.989			380.614	456.611			1536.04	571.544
		606.908	440.106			863.104	456.467			566.347	570.912
		606.57	439.767			269.398	456.294			1270.59	570.864
		820.469	439.59			256.645	454.413			232.418	570.82
		715.194	439.464			110.651	453.681			1371.65	570.669
		386.646	437.498			1943.99	453.252			1377.3	570.663
		359.452	436.763			353.647	453.005			1207.88	570.173
		1186.1	436.762			723.169	452.169			1477.57	570.137
		816.843	436.103			1130.35	451.498			473.374	570.052
		826.779	435.821			635.223	451.245			1477.48	569.667
		409.927	434.685			428.545	449.97			966.11	569.048
		499.931	434.086			1472.42	449.502			672.865	568.838
		824.997	434.046			1080.99	448.452			1540.43	568.686
		410.187	434.021			1075.84	448.103			895.863	568.55
		720.599	433.815			914.263	447.916			960.328	568.54
		264.363	433.388			504.377	447.626			301.71	568.082
		490.757	433.102			460.342	447.097			876.092	566.524
		1802.27	432.938			608.727	445.678			1179.57	566.354
		700.75	432.741			724.739	445.393			2098.03	566.348
		940.482	432.045			717.479	445.25			2240.46	566.222
		769.588	431.696			462.478	444.751			478.438	565.908
		299.843	431.641			1796.15	444.566			1341.65	565.225
		1061.88	430.904			847.328	444.503			903.776	565.109
		835.608	429.972			944.989	444.249			700.75	564.704
		1052.16	429.766			495.768	444.058			1281.65	564.525
		567.646	429.654			1725.37	443.346			632.053	564.369
		343.824	429.389			1328.52	443.283			694.765	564.076
		1027.37	429.165			1177.91	442.454			1339.04	563.947
		443.591	429.083			1466.09	441.877			259.214	563.35
		1257.79	428.954			829.054	441.651			1530.05	563.053
		1188.54	428.954			1167	441.613			1033.71	562.595
		912.234	428.7			1758.9	441.554			811.757	562.235
		1733.22	428.696			562.918	440.739			591.79	561.969
		1203.66	427.962			1050.25	440.553			920.135	561.691
		484.712	427.302			1718.88	439.085			1801.26	561.614
		1992.63	427.182			1516.42	439.03			375.153	561.497
		1021.08	426.712			1343.72	438.805			965.777	561.142
		741.62	425.887			626.275	438.628			975.161	560.291
		774.643	424.597			491.49	438.51			1208.47	560.055
		487.295	424.542			978.449	437.451			608.867	559.984
		1373.7	424.066			1463.72	437.304			571.706	559.776
		1177.93	423.976			1560.85	437.209			686.194	559.556
		1062.82	423.826			729.392	436.928			604.698	559.552
		616.528	423.783			406.475	436.69			1278.07	559.45
		1389.49	423.744			1100.97	436.671			1654.35	558.621
		322.564	423.652			1663.06	436.295			870.381	558.462
		557	423.231			1754.93	435.156			822.144	558.033
		1753.91	423.212			959.54	435.114			1056.72	557.478
		373.244	422.718			1094.06	434.986			1194.98	557.452
		1646.1	422.668			785.164	434.602			848.308	557.334
		1442.33	421.838			1554.08	433.493			807.957	557.319
		246.242	421.318			1361.94	433.357			1541.87	557.294
		300.463	420.112			1112.61	432.741			1159.84	557.224
		469.218	419.659			1020.54	432.712			829.508	557.171
		1213.31	419.627			164.984	432.32			1074.62	557.123
		1337.66	419.591			438.685	432.014			1144.34	556.499
		1014.03	419.497			1565.62	431.285			990.206	555.208
		271.853	419.065			1256.04	431.117			634.626	555.094
		1152.65	418.609			218.252	431.08			1531.69	554.818
		1350.42	417.853			678.796	430.299			491.102	554.802
		1431.18	417.782			860.157	429.609			1021.03	554.425
		507.224	417.382			896.326	429.308			255.463	554.352
		404.034	416.818			219.017	429.206			1310.56	554.223
		1517.07	416.354			1308.92	429.141			488.414	554.077
		1253.95	415.579			329.653	428.888			830.482	553.93
		496.294	415.246			1049.39	428.871			653.5	553.704
		663.305	414.748			280.55	428.31			308.587	553.634
		1314.3	414.64			473.095	428.258			649.88	553.255
		414.694	413.933			1097.43	427.909			266.711	553.11
		457.485	413.24			647.785	427.021			782.308	552.93
		280.582	412.989			1767.14	425.227			576.102	552.849
		818.814	411.445			1204.59	425.049			833.609	551.058
		471.052	411.177			1033.07	424.559			1403.1	551.003
		334.789	410.353			1516.67	424.025			222.957	550.601
		1918.26	410.126			495.112	422.61			1184.68	550.184
		490.093	410.094			1893.24	420.813			679	549.7
		1239.07	410.072			1331.5	418.269			1002.44	549.297
		905.83	410.061			1150.69	418.013			522.351	549.067
		1391.87	409.718			469.101	417.518			779.927	548.964
		581.984	408.546			906.612	416.572			971.6	548.962
		895.251	408.296			443.674	416.167			465.531	548.618
		521.145	407.232			298.353	416.143			816.182	548.207
		1019.77	405.939			1378.5	414.665			1595.7	548.037
		435.566	405.615			1397.62	414.638			917.636	548.037
		1029.3	405.497			550.922	412.732			1564.07	547.79
		1500.99	405.003			1463.68	412.45			758.067	547.674
		1524.18	404.911			855.867	412.238			410.543	547.045
		420.324	404.574			973.871	412.236			1285.8	546.92
		429.726	404.523			1548.78	411.713			326.232	546.834
		1266.94	404.162			932.448	411.652			1128.02	546.661
		112.8	404.022			587.895	410.496			1322.92	546.536
		626.331	403.677			281.333	409.626			1066.07	546.425
		1313.63	403.649			344.46	409.556			940.791	545.707
		1016.34	403.226			1193.28	408.482			369.969	545.704
		86.0254	403.055			1252.58	408.48			951.157	545.594
		598.497	402.229			1021.7	407.926			1166.53	545.44
		1294.8	402.099			672.749	407.896			286.461	544.226
		990.245	402.095			1491.85	407.521			368.984	544.175
		1493.76	402.09			607.804	407.399			839.333	544.088
		557.517	401.682			1334.72	407.347			912.485	543.922
		1109.01	401.401			315.606	406.73			1117.07	543.425
		462.636	401.291			566.712	406.662			842.246	543.348
		1334.53	401.133			1069	406.123			301.216	542.961
		798.214	401.073			1185.37	405.806			516.862	542.928
		1239.01	400.443			970.546	404.588			194.407	541.647
		532.475	400.088			810.942	404.322			956.088	541.609
		1024.36	399.715			740.111	404.249			1217.38	541.407
		737.061	399.655			867.786	403.493			825.398	540.913
		1420.91	399.296			1148.1	403.057			1865.43	540.777
		1089.43	399.091			1778.88	402.187			1349.51	540.708
		1034.1	398.872			163.948	402.153			606.823	540.581
		679.769	398.669			961.423	402.076			993.038	540.21
		1026.7	398.085			1009.43	401.609			957.865	539.633
		421.333	398.072			568.12	401.581			946.752	538.84
		1515.5	397.737			809.96	400.833			876.113	538.529
		1207.73	397.268			141.778	400.723			1691.11	537.976
		1115.8	397.234			567.525	400.071			377.212	537.757
		503.891	397.006			407.378	399.905			1059.16	537.652
		487.369	396.927			1227.23	399.431			1346.95	537.322
		280.966	396.578			910.043	399.15			566.342	536.952
		1831.4	395.765			958.78	398.499			988.306	536.937
		876.144	395.741			1544.21	397.756			1513.07	536.867
		1086.72	395.619			947.236	397.383			1466.28	536.795
		141.335	394.104			423.449	396.738			443.168	536.735
		487.642	393.586			752.649	395.896			738.871	536.441
		1297.04	392.827			374.342	394.78			676.665	535.056
		244.253	391.883			1607.41	394.327			417.452	534.959
		555.637	391.539			1159.86	394.14			1324.66	534.603
		1039.18	391.383			1015.75	393.133			1072.58	533.87
		1082.9	391.365			1212.64	392.354			1126.4	533.32
		425.83	391.338			1204.66	390.553			561.92	533.008
		587.801	389.685			446.468	389.619			919.582	532.894
		414.93	389.3			881.635	389.104			1913.97	532.339
		1525.15	389.194			312.489	388.664			1192.39	532.301
		1045.55	388.421			1010.66	388.636			459.019	532.152
		829.839	387.885			1262.34	388.512			640.436	532.148
		599.637	387.757			112.653	388.362			1328.15	532.117
		1255.4	387.538			754.268	388.042			743.729	531.944
		405.54	387.452			519.925	387.922			1465.01	531.354
		1309.53	387.07			361.834	387.376			1238.24	531.252
		970.5	386.663			1321.08	386.728			431.045	530.66
		972.631	386.127			1667.26	386.071			1305.13	530.284
		513.926	386.037			712.828	385.702			485.082	529.826
		1669.37	386.006			1293.26	384.353			1042.55	529.685
		1137.9	385.78			451.645	383.595			1261.75	529.58
		1032.49	385.403			494.468	383.462			1241.74	529.126
		349.824	384.938			1377.08	381.714			1143.37	528.895
		812.981	383.986			1003	381.22			1627.85	528.484
		1502.16	383.765			1745.8	381.149			370.923	528.233
		319.928	383.575			334.414	380.109			994.009	527.632
		984.701	383.574			358.456	379.796			1123.71	527.217
		266.808	383.357			1121.34	379.077			976.502	527.123
		539.835	382.444			732.454	378.401			452.798	527.018
		230.989	381.965			1599.5	377.791			969.788	526.675
		896.302	381.814			545.079	377.526			973.476	526.173
		1220.56	381.649			1265.01	377.501			474.753	525.673
		707.763	380.653			670.073	376.319			759.289	525.557
		1148.5	380.452			640.69	376.265			762.824	525.484
		568.511	380.111			1858.44	374.48			764.602	525.158
		1183.44	378.844			766.401	374.432			605.967	524.46
		465.261	378.749			1286.33	374.317			871.474	524.186
		309.276	378.621			549.176	373.899			1087.36	524.154
		983.094	378.257			1085.88	373.071			1402.82	524.072
		854.137	378.158			1141.82	371.448			1434.07	523.923
		883.893	377.607			1862.63	371.439			1483.63	523.61
		600.514	377.378			907.094	370.164			536.572	523.336
		445.91	377.142			690.585	370.021			1278.25	523.233
		1229.3	377.012			698.868	369.998			1877.87	522.87
		1358.79	377.009			786.447	369.867			1624.08	522.655
		192.651	376.338			113.224	369.811			724.062	522.447
		1198.59	374.771			762.745	368.843			1554.29	522.306
		996.877	374.522			972.976	368.664			419.137	521.972
		588.455	373.96			1430.21	367.186			586.9	521.889
		389.923	373.791			1100.16	366.069			748.199	521.889
		833.026	373.578			403.134	366.042			382.262	521.714
		707.673	372.884			1808.89	365.975			1070.37	521.684
		418.148	372.696			984.511	365.317			841.923	521.501
		782.03	372.196			1056.88	365.286			1528.48	521.482
		417.701	372.015			344.417	364.699			839.234	521.159
		1196	371.625			277.024	363.311			1612.6	521.127
		316.954	370.407			137.846	363.283			548.944	521.027
		534.446	370.221			554.132	363.083			1121.34	519.991
		1023.57	369.515			411.426	360.963			450.666	519.827
		1301.62	369.438			942.637	360.808			738.556	519.562
[truncated: 1,339 more rows]

## Sheet: Donor X2 +AAV
	CPSF6	p24			CPSF6	p24			CPSF6	p24			CPSF6	p24		Infected cells
[truncated: 7,580 more rows]

[truncated: 5 more sheets: Donor Z2 +LV, Donor Z2 +AAV, Donor Y2 +LV, Donor Y2 +AAV, Correlation]
